# Supplementary material for: Stall force measurement of the kinesin-3 motor KIF1A using a programmable DNA origami nanospring
Source: eLife. 2026 Mar 25;14:RP108477. doi: 10.7554/eLife.108477 (PMC13016605; doi:10.7554/eLife.108477)
Supplement: Figure 1—source data 1. [file elife-108477-fig1-data1.xlsx]

## Sheet: d
extension (um)	Force (pN)	extension_SD (nm)	Force_SD (pN)
0	0	0	0
0.06049	0.04231	0.05588	0.07983
0.15133	0.08121	0.01087	0.1059
0.18049	0.08776	0.00698	0.1169
0.20204	0.09332	0.00569	0.11703
0.2206	0.10401	0.00494	0.12676
0.23704	0.11715	0.00455	0.13755
0.25198	0.12083	0.00418	0.14209
0.26719	0.14122	0.00452	0.14562
0.28304	0.15499	0.00468	0.16659
0.30034	0.17377	0.00512	0.16438
0.31747	0.20201	0.00506	0.18034
0.33313	0.22475	0.00407	0.20125
0.34758	0.23577	0.00418	0.18546
0.3614	0.29259	0.00394	0.21662
0.37425	0.31547	0.00358	0.20946
0.38607	0.37079	0.00329	0.23204
0.39698	0.41464	0.00296	0.22791
0.40645	0.49321	0.00262	0.2455
0.41483	0.52858	0.00227	0.25213
0.42257	0.57853	0.00208	0.27916
0.42982	0.65231	0.00216	0.28659
0.43673	0.69851	0.00172	0.30457
0.4426	0.74597	0.00161	0.3027
0.4484	0.80259	0.00168	0.31735
0.45393	0.87139	0.00152	0.34483
0.45909	0.93353	0.00152	0.3518
0.46408	1.00808	0.00136	0.38755
0.46879	1.07355	0.00132	0.41192
0.47324	1.14137	0.0013	0.43054
0.47755	1.20507	0.00115	0.43976
0.48155	1.28648	0.00114	0.46894
0.48537	1.33677	0.00103	0.50136
0.48893	1.4248	0.00101	0.55355
0.49227	1.49963	0.000979	0.5621
0.49575	1.61688	0.000974	0.61966
0.49899	1.68712	0.000885	0.66012
0.50203	1.78275	0.000896	0.70555
0.50511	1.85351	0.000898	0.72469
0.50827	1.95611	0.000931	0.7988
0.5114	2.01683	0.000883	0.85835
0.51441	2.13156	0.000843	0.91069
0.51734	2.29171	0.000841	1.01114
0.52028	2.35309	0.000829	1.00532
0.52299	2.43527	0.000743	1.08296
0.52556	2.64553	0.000722	1.19383
0.52802	2.68266	0.000748	1.19363
0.5305	2.83464	0.000686	1.29606
0.53281	2.90975	0.000654	1.38211
0.5351	3.05402	0.000642	1.4904
0.53729	3.16604	0.00064	1.55938
0.53948	3.28106	0.000601	1.61835
0.54158	3.39795	0.000634	1.72459
0.54381	3.43606	0.000634	1.74022
0.54599	3.62857	0.000615	1.80549
0.5483	3.72186	0.000678	1.88074
0.55052	3.80654	0.000641	2.00122
0.55279	3.92815	0.000641	1.97356
0.55502	4.01352	0.000626	2.13776
0.55732	4.18099	0.000698	2.09715
0.55964	4.23684	0.000615	2.13076
0.5618	4.49003	0.000649	2.27645
0.56395	4.59531	0.000614	2.33934
0.56603	4.73743	0.000615	2.41376
0.56812	4.91429	0.000615	2.60588
0.5704	4.98472	0.000702	2.51524
0.57274	5.14185	0.000652	2.4846
0.57493	5.51864	0.000599	2.77242
0.5771	5.95857	0.000639	2.7453
0.57936	6.17783	0.000654	2.73614
0.58162	6.41803	0.000667	2.93298
0.58398	6.74657	0.000672	2.98724
0.58628	7.15771	0.000688	3.22884
0.58867	7.17373	0.000704	3.02449
0.59117	7.46863	0.000718	3.22087
0.59374	7.78193	0.000762	3.23438
0.59635	8.41874	0.000758	3.58798
0.59911	8.63485	0.000822	3.38363
0.60196	9.20372	0.000822	3.67528
0.6048	9.99027	0.000849	3.91084
0.60784	10.6829	0.000917	4.12653
0.61118	11.4817	0.00105	4.55759
0.61504	12.449	0.00125	5.12008
0.62036	14.3625	0.00186	6.06436
0.6274	16.5584	0.00221	6.34388
0.63585	18.3188	0.00262	6.26917
0.6456	23.6319	0.00308	6.6547
0.66071	28.8445	0.00647	5.81612
0.68263	40.9685	0.00577	5.36109
