# Supplementary material for: Stall force measurement of the kinesin-3 motor KIF1A using a programmable DNA origami nanospring
Source: eLife. 2026 Mar 25;14:RP108477. doi: 10.7554/eLife.108477 (PMC13016605; doi:10.7554/eLife.108477)
Supplement: Figure 2—source data 1. [file elife-108477-fig2-data1.xlsx]

## Sheet: Simulation_chain
Simulation	chain fitting
398 nm				501 nm				599 nm				658 nm
video_id	frame_id	estimated length		video_id	frame_id	estimated length		video_id	frame	estimated length		video_id	frame	estimated length
1	0	419.285		1	0	482.842		1	0	622.415		1	0	647.589
1	1	425.639		1	1	516.174		1	1	609.133		1	1	673.456
1	2	410.014		1	2	492.885		1	2	632.064		1	2	659.216
1	3	408.094		1	3	497.586		1	3	594.016		1	3	699.905
1	4	410.326		1	4	505.989		1	4	634.493		1	4	666.838
1	5	410.958		1	5	494.035		1	5	631.896		1	5	657.927
1	6	394.458		1	6	509.919		1	6	577.688		1	6	660.243
1	7	380.842		1	7	496.906		1	7	617.699		1	7	674.583
1	8	397.798		1	8	506.975		1	8	630.466		1	8	648.621
1	9	406.915		1	9	495.066		1	9	620.179		1	9	676.185
1	10	397.99		1	10	497.136		1	10	594.009		1	10	658.192
1	11	422.722		1	11	500.109		1	11	605.44		1	11	626.161
1	12	415.125		1	12	507.244		1	12	601.672		1	12	650.675
1	13	412.787		1	13	498.998		1	13	599.391		1	13	637.969
1	14	407.746		1	14	498.712		1	14	624.683		1	14	645.252
1	15	411.64		1	15	498.968		1	15	600.657		1	15	670.923
1	16	403.836		1	16	493.75		1	16	612.535		1	16	668.651
1	17	418.897		1	17	503.34		1	17	595.631		1	17	639.771
1	18	431.408		1	18	482.398		1	18	579.506		1	18	661.578
1	19	408.721		1	19	495.557		1	19	613.22		1	19	685.977
1	20	401.178		1	20	486.651		1	20	597.967		1	20	666.761
1	21	410.65		1	21	504.271		1	21	622.381		1	21	658.007
1	22	412.516		1	22	505.676		1	22	614.172		1	22	681.915
1	23	393.442		1	23	523.216		1	23	606.432		1	23	669.336
1	24	407.224		1	24	480.169		1	24	617.001		1	24	639.183
1	25	394.855		1	25	506.776		1	25	606.928		1	25	669.475
1	26	394.888		1	26	496.368		1	26	601.757		1	26	647.674
1	27	414.258		1	27	499.782		1	27	591.522		1	27	637.344
1	28	421.321		1	28	483.901		1	28	623.928		1	28	668.86
1	29	391.914		1	29	492.685		1	29	623.732		1	29	642.423
1	30	419.122		1	30	515.53		1	30	618.784		1	30	662.546
1	31	396.454		1	31	494.411		1	31	594.005		1	31	632.352
1	32	390.121		1	32	499.199		1	32	604.926		1	32	648.668
1	33	412.01		1	33	505.106		1	33	604.342		1	33	672.363
1	34	421.585		1	34	485.373		1	34	614.405		1	34	649.469
1	35	419.638		1	35	503.982		1	35	602.503		1	35	672.785
1	36	408.996		1	36	501.174		1	36	616.169		1	36	642.087
1	37	384.818		1	37	491.278		1	37	598.436		1	37	654.169
1	38	403.303		1	38	503.876		1	38	595.461		1	38	672.684
1	39	378.755		1	39	486.21		1	39	604.957		1	39	650.675
1	40	415.186		1	40	498.128		1	40	608.277		1	40	654.1
1	41	381.937		1	41	510.883		1	41	590.194		1	41	660
1	42	404.499		1	42	520.938		1	42	617.309		1	42	651.014
1	43	401.947		1	43	490.599		1	43	605.244		1	43	651.034
1	44	390.079		1	44	528.588		1	44	623.215		1	44	652.456
1	45	403.94		1	45	505.923		1	45	620.47		1	45	665.665
1	46	422.508		1	46	503.161		1	46	601.993		1	46	654.276
1	47	399.392		1	47	496.633		1	47	592.675		1	47	653.278
1	48	407.652		1	48	511.307		1	48	611.782		1	48	654.536
1	49	394.447		1	49	499.492		1	49	602.531		1	49	652.905
1	50	399.212		1	50	526.061		1	50	600.674		1	50	672.225
1	51	402.805		1	51	496.924		1	51	605		1	51	648.079
1	52	387.522		1	52	500.367		1	52	589.986		1	52	673.932
1	53	418.824		1	53	497.487		1	53	605.004		1	53	660.198
1	54	404.577		1	54	500.743		1	54	612.849		1	54	672.239
1	55	415.257		1	55	500.202		1	55	594.091		1	55	665.976
1	56	417.757		1	56	523.205		1	56	626.844		1	56	656.031
1	57	405.339		1	57	487.057		1	57	585.456		1	57	634.323
1	58	408.463		1	58	503.906		1	58	624.347		1	58	653.956
1	59	415.148		1	59	508.625		1	59	610.685		1	59	656.438
1	60	407.462		1	60	489.178		1	60	625.209		1	60	639.151
1	61	412.504		1	61	478.292		1	61	607.097		1	61	648.845
1	62	414.892		1	62	496.603		1	62	597.385		1	62	651.313
1	63	438.072		1	63	506.056		1	63	587.427		1	63	647.403
1	64	399.991		1	64	517.068		1	64	595.73		1	64	678.376
1	65	412.258		1	65	485.191		1	65	621.692		1	65	659.362
1	66	401.92		1	66	495.494		1	66	628.129		1	66	689.167
1	67	404.164		1	67	488.986		1	67	625.855		1	67	674.99
1	68	422.295		1	68	483.266		1	68	630.796		1	68	655.13
1	69	411.12		1	69	494.116		1	69	623.919		1	69	664.717
1	70	406.344		1	70	504.105		1	70	622.78		1	70	669.619
1	71	411.527		1	71	505.186		1	71	608.103		1	71	649.737
1	72	391.402		1	72	487.985		1	72	617.413		1	72	670.035
1	73	396.07		1	73	504.851		1	73	611.614		1	73	676.93
1	74	388.183		1	74	517.962		1	74	616.742		1	74	661.879
1	75	414.845		1	75	504.27		1	75	626.271		1	75	656.901
1	76	403.354		1	76	492.662		1	76	599.704		1	76	636.172
1	77	405.743		1	77	522.475		1	77	625.215		1	77	671.029
1	78	419.911		1	78	502.588		1	78	598.798		1	78	646.629
1	79	423.1		1	79	475.523		1	79	585.841		1	79	669.853
1	80	405.59		1	80	486.61		1	80	605.403		1	80	660.188
1	81	411.758		1	81	504.438		1	81	613.833		1	81	659.385
1	82	392.029		1	82	509.11		1	82	636.433		1	82	649.854
1	83	430.06		1	83	500.324		1	83	610.881		1	83	667.425
1	84	411.381		1	84	495.861		1	84	599.862		1	84	659.172
1	85	398.159		1	85	510.853		1	85	611.284		1	85	654.574
1	86	398.78		1	86	490.453		1	86	591.556		1	86	674.76
1	87	417.188		1	87	501.554		1	87	602.085		1	87	660.646
1	88	405.968		1	88	485.008		1	88	615.383		1	88	645.041
1	89	418.053		1	89	492.809		1	89	611.332		1	89	680.086
1	90	389.454		1	90	490.629		1	90	582.936		1	90	675.519
1	91	388.972		1	91	512.921		1	91	622.409		1	91	660.916
1	92	439.227		1	92	505.758		1	92	597.847		1	92	653.182
1	93	422.035		1	93	491.852		1	93	607.513		1	93	660.202
1	94	409.145		1	94	533.39		1	94	619.234		1	94	651.674
1	95	427.09		1	95	463.595		1	95	587.515		1	95	649.029
1	96	419.29		1	96	516.826		1	96	619.55		1	96	672.457
1	97	413.765		1	97	493.004		1	97	611.929		1	97	641.363
1	98	400.866		1	98	490.41		1	98	614.753		1	98	669.062
1	99	411.405		1	99	506.049		1	99	591.637		1	99	659.883
1	100	395.767		1	100	502.955		1	100	590.045		1	100	686.742
1	101	394.619		1	101	493.654		1	101	589.77		1	101	637.297
1	102	418.589		1	102	487.318		1	102	616.594		1	102	658.978
1	103	417.402		1	103	517.053		1	103	625.519		1	103	653.277
1	104	398.937		1	104	505.892		1	104	608.238		1	104	651.496
1	105	392.704		1	105	504.31		1	105	624.457		1	105	643.403
1	106	414.22		1	106	487.589		1	106	589.668		1	106	655.799
1	107	397.191		1	107	498.601		1	107	602.657		1	107	670.664
1	108	388.982		1	108	508.196		1	108	608.12		1	108	642.984
1	109	379.467		1	109	494.793		1	109	639.586		1	109	678.109
1	110	403.566		1	110	497.074		1	110	608.78		1	110	660.424
1	111	405.233		1	111	469.911		1	111	620.343		1	111	660.155
1	112	426.812		1	112	506.48		1	112	595.984		1	112	659.323
1	113	413.012		1	113	483.909		1	113	628.442		1	113	636.073
1	114	407.469		1	114	481.543		1	114	618.333		1	114	667.838
1	115	407.796		1	115	505.856		1	115	601.18		1	115	637.309
1	116	425.532		1	116	500.586		1	116	614.558		1	116	662.535
1	117	399.863		1	117	507.991		1	117	601.032		1	117	649.266
1	118	426.548		1	118	478.888		1	118	624.302		1	118	651.53
1	119	412.677		1	119	461.237		1	119	579.005		1	119	662.755
1	120	405.793		1	120	479.44		1	120	583.651		1	120	645.373
1	121	393.746		1	121	493.551		1	121	612.972		1	121	666.307
1	122	409.017		1	122	501.119		1	122	634.123		1	122	649.447
1	123	385.825		1	123	489.175		1	123	621.472		1	123	643.005
1	124	417.093		1	124	485.021		1	124	608.784		1	124	689.961
1	125	421.449		1	125	491.103		1	125	614.74		1	125	666.373
1	126	401.056		1	126	500.517		1	126	619.308		1	126	666.791
1	127	410.586		1	127	475.513		1	127	596.509		1	127	669.36
1	128	399.443		1	128	491.015		1	128	610.425		1	128	677.564
1	129	401.931		1	129	512.172		1	129	614.364		1	129	683.111
1	130	396.808		1	130	494.405		1	130	597.171		1	130	664.762
1	131	387.157		1	131	523.07		1	131	611.669		1	131	657.563
1	132	403.147		1	132	495.068		1	132	626.7		1	132	651.308
1	133	404.048		1	133	486.133		1	133	609.404		1	133	651.135
1	134	398.154		1	134	482.987		1	134	613.772		1	134	670.441
1	135	434.766		1	135	508.239		1	135	614.362		1	135	672.777
1	136	404.235		1	136	489.073		1	136	619.745		1	136	641.015
1	137	404.222		1	137	470.103		1	137	616.631		1	137	659.73
1	138	417.701		1	138	484.1		1	138	625.841		1	138	656.338
1	139	417.388		1	139	473.915		1	139	618.576		1	139	672.555
1	140	397.355		1	140	493.191		1	140	633.727		1	140	664.426
1	141	405.85		1	141	515.262		1	141	604.13		1	141	659.138
1	142	421.415		1	142	497.754		1	142	623.924		1	142	641.059
1	143	388.641		1	143	497.874		1	143	594.005		1	143	661.016
1	144	411.294		1	144	532.306		1	144	616.412		1	144	632.349
1	145	409.373		1	145	472.596		1	145	634.001		1	145	632.019
1	146	403.94		1	146	475.4		1	146	602.459		1	146	650.665
1	147	408.014		1	147	519.784		1	147	593.569		1	147	674.961
1	148	415.214		1	148	494.807		1	148	618.311		1	148	683.717
1	149	411.39		1	149	480.94		1	149	618.929		1	149	617.354
1	150	417.894		1	150	489.018		1	150	611.195		1	150	666.915
1	151	409.281		1	151	485.364		1	151	610.465		1	151	651.696
1	152	416.072		1	152	520.05		1	152	647.155		1	152	647.854
1	153	422.862		1	153	486.474		1	153	587.606		1	153	665.102
1	154	405.431		1	154	505.223		1	154	609.466		1	154	661.221
1	155	394.947		1	155	483.342		1	155	619.823		1	155	636.286
1	156	438.694		1	156	499.217		1	156	625.104		1	156	670.816
1	157	407.652		1	157	511.539		1	157	608.241		1	157	658.174
1	158	417.278		1	158	505.227		1	158	607.286		1	158	667.464
1	159	409.848		1	159	516.767		1	159	605.925		1	159	679.792
1	160	406.286		1	160	502.304		1	160	602.415		1	160	669.457
1	161	410.657		1	161	484.213		1	161	602.264		1	161	684.142
1	162	398.559		1	162	497.437		1	162	608.854		1	162	650.584
1	163	424.904		1	163	506.969		1	163	612.692		1	163	663.835
1	164	394.733		1	164	482.467		1	164	622.363		1	164	662.227
1	165	404.46		1	165	506.315		1	165	608.846		1	165	662.005
1	166	422.23		1	166	509.384		1	166	601.448		1	166	674.781
1	167	405.561		1	167	506.955		1	167	624.675		1	167	668.087
1	168	403.115		1	168	475.409		1	168	604.11		1	168	669.413
1	169	396.773		1	169	492.287		1	169	595.242		1	169	651.272
1	170	421.708		1	170	483.88		1	170	631.515		1	170	676.166
1	171	419.131		1	171	498.469		1	171	610.543		1	171	644.446
1	172	402.226		1	172	485.455		1	172	599.713		1	172	643.896
1	173	429.036		1	173	523.965		1	173	605.865		1	173	690.722
1	174	421.494		1	174	511.741		1	174	651.911		1	174	626.415
1	175	407.71		1	175	504.346		1	175	619.138		1	175	661.918
1	176	419.32		1	176	476.477		1	176	610.849		1	176	680.513
1	177	421.034		1	177	453.135		1	177	618.179		1	177	661.84
1	178	394.682		1	178	502.134		1	178	591.381		1	178	663.292
1	179	424.224		1	179	480.467		1	179	621.645		1	179	643.133
1	180	413.109		1	180	491.047		1	180	616.264		1	180	668.162
1	181	406.025		1	181	521.071		1	181	612.086		1	181	668.746
1	182	398.057		1	182	505.313		1	182	599.589		1	182	658.541
1	183	410.384		1	183	488.535		1	183	623.38		1	183	673.711
1	184	428.675		1	184	507.896		1	184	598.459		1	184	661.559
1	185	419.778		1	185	496.703		1	185	606.451		1	185	655.71
1	186	408.816		1	186	481.233		1	186	601.187		1	186	662.657
1	187	420.217		1	187	492.12		1	187	614.25		1	187	641.118
1	188	374.935		1	188	482.465		1	188	635.448		1	188	677.177
1	189	406.728		1	189	509.379		1	189	622.848		1	189	639.144
1	190	398.934		1	190	514.598		1	190	579.057		1	190	665.441
1	191	416.335		1	191	480.824		1	191	608.917		1	191	648.822
1	192	399.104		1	192	479.417		1	192	601.998		1	192	656.092
1	193	409.696		1	193	497.117		1	193	607.97		1	193	628.698
1	194	406.29		1	194	485.763		1	194	596.898		1	194	678.339
1	195	422.103		1	195	499.534		1	195	616.871		1	195	665.319
1	196	397.433		1	196	537.813		1	196	616.731		1	196	644.663
1	197	410.03		1	197	477.406		1	197	611.576		1	197	662.499
1	198	389.661		1	198	498.428		1	198	608.487		1	198	671.082
1	199	412.916		1	199	486.436		1	199	634.685		1	199	662.568
1	200	423.484		1	200	496.012		1	200	632.059		1	200	672.349
1	201	405.683		1	201	499.7		1	201	620.249		1	201	679.573
1	202	392.814		1	202	490.676		1	202	602.488		1	202	676.034
1	203	387.969		1	203	494.994		1	203	631.889		1	203	663.326
1	204	416.646		1	204	490.855		1	204	602.677		1	204	645.007
1	205	415.36		1	205	500.383		1	205	623.973		1	205	650.393
1	206	408.518		1	206	501.161		1	206	623.51		1	206	639.287
1	207	420.219		1	207	497.973		1	207	563.515		1	207	653.272
1	208	407.99		1	208	501.179		1	208	618.62		1	208	663.201
1	209	403.786		1	209	498.306		1	209	597.999		1	209	681.07
1	210	402.887		1	210	494.716		1	210	601.879		1	210	631.906
1	211	382.855		1	211	486.191		1	211	601.48		1	211	649.593
1	212	434.674		1	212	497.158		1	212	622.378		1	212	618.3
1	213	405.038		1	213	494.58		1	213	596.349		1	213	641.467
1	214	384.206		1	214	489.523		1	214	633.475		1	214	667.069
1	215	400.722		1	215	500.931		1	215	597.195		1	215	641.662
1	216	412.154		1	216	514.538		1	216	615.437		1	216	649.64
1	217	413.814		1	217	516.009		1	217	611.987		1	217	680.997
1	218	411.459		1	218	500.265		1	218	605.383		1	218	642.764
1	219	386.786		1	219	499.425		1	219	607.774		1	219	664.519
1	220	414.098		1	220	521.512		1	220	601.75		1	220	671.007
1	221	401.987		1	221	510.91		1	221	611.531		1	221	631.211
1	222	411.674		1	222	497.432		1	222	613.271		1	222	649.7
1	223	400.75		1	223	505.142		1	223	600.555		1	223	668.914
1	224	398.736		1	224	498.344		1	224	597.888		1	224	671.983
1	225	408.786		1	225	502.755		1	225	617.693		1	225	657.248
1	226	423.77		1	226	527.046		1	226	607.252		1	226	628.443
1	227	434.608		1	227	499.805		1	227	617.294		1	227	641.24
1	228	411.722		1	228	488.583		1	228	601.081		1	228	657.046
1	229	386.595		1	229	476.705		1	229	609.854		1	229	632.441
1	230	406.249		1	230	507.471		1	230	612.325		1	230	657.96
1	231	388.827		1	231	483.826		1	231	611.41		1	231	666.853
1	232	399.697		1	232	483.049		1	232	620.73		1	232	636.394
1	233	389.426		1	233	504.442		1	233	629.754		1	233	683.886
1	234	387.677		1	234	502.105		1	234	630.728		1	234	640.269
1	235	419.14		1	235	507.482		1	235	626.029		1	235	673.278
1	236	379.314		1	236	480.049		1	236	606.137		1	236	655.131
1	237	439.705		1	237	505.583		1	237	602.53		1	237	646.967
1	238	382.354		1	238	484.995		1	238	635.319		1	238	649.643
1	239	428.39		1	239	463.212		1	239	638.759		1	239	636.073
1	240	413.253		1	240	487.788		1	240	594.183		1	240	669.989
1	241	409.313		1	241	488.938		1	241	610.908		1	241	667.261
1	242	414.118		1	242	494.349		1	242	630.215		1	242	648.019
1	243	408.336		1	243	487.046		1	243	600.981		1	243	658.663
1	244	401.163		1	244	479.684		1	244	623.257		1	244	644.707
1	245	423.596		1	245	491.721		1	245	607.244		1	245	676.173
1	246	400.373		1	246	488.668		1	246	627.42		1	246	674.486
1	247	398.862		1	247	488.451		1	247	611.009		1	247	660.063
1	248	393.446		1	248	498.623		1	248	607.239		1	248	655.59
1	249	407.334		1	249	494.384		1	249	621.178		1	249	663.877
1	250	415.51		1	250	505.754		1	250	597.97		1	250	652.817
1	251	375.436		1	251	504.153		1	251	598.101		1	251	653.046
1	252	402.176		1	252	463.619		1	252	619.615		1	252	641.877
1	253	406.463		1	253	505.132		1	253	615.999		1	253	640.84
1	254	416.713		1	254	492.59		1	254	595.898		1	254	688.475
1	255	401.011		1	255	482.663		1	255	607.463		1	255	663.047
1	256	390.802		1	256	524.837		1	256	612.412		1	256	629.591
1	257	413.351		1	257	496.679		1	257	610.867		1	257	676.842
1	258	409.412		1	258	490.245		1	258	622.144		1	258	678.587
1	259	424.401		1	259	489.252		1	259	582.566		1	259	683.236
1	260	419.238		1	260	503.876		1	260	603.577		1	260	656.342
1	261	405.534		1	261	518.644		1	261	598.327		1	261	660.681
1	262	393.084		1	262	505.085		1	262	603.334		1	262	635.347
1	263	393.497		1	263	511.039		1	263	612.299		1	263	671.962
1	264	423.047		1	264	492.344		1	264	597.348		1	264	668.727
1	265	404.108		1	265	503.216		1	265	620.118		1	265	656.948
1	266	436.811		1	266	518.508		1	266	610.185		1	266	662.992
1	267	414.622		1	267	480.232		1	267	599.576		1	267	672.709
1	268	396.454		1	268	492.413		1	268	604.118		1	268	662.945
1	269	398.465		1	269	505.939		1	269	599.336		1	269	657.559
1	270	391.103		1	270	530.162		1	270	616.983		1	270	659.396
1	271	395.062		1	271	505.361		1	271	604.782		1	271	645.616
1	272	399.051		1	272	503.67		1	272	611.25		1	272	672.685
1	273	411.868		1	273	507.192		1	273	606.981		1	273	667.06
1	274	407.81		1	274	506.24		1	274	592.937		1	274	671.56
1	275	401.313		1	275	498.778		1	275	618.239		1	275	668.028
1	276	420.51		1	276	480.847		1	276	598.02		1	276	675.051
1	277	408.222		1	277	510.112		1	277	610.275		1	277	662.16
1	278	423.936		1	278	505.442		1	278	637.463		1	278	651.556
1	279	420.19		1	279	511.128		1	279	628.234		1	279	650.728
1	280	421.27		1	280	496.149		1	280	609.92		1	280	668.435
1	281	406.43		1	281	491.699		1	281	622.578		1	281	654.319
1	282	414.398		1	282	475.062		1	282	616.104		1	282	650.821
1	283	416.583		1	283	495.586		1	283	599.926		1	283	654.92
1	284	402.772		1	284	484.945		1	284	590.796		1	284	678.25
1	285	401.684		1	285	528.267		1	285	606.796		1	285	633.556
1	286	422.33		1	286	481.128		1	286	601.951		1	286	665.939
1	287	401.64		1	287	492.387		1	287	588.964		1	287	649.275
1	288	387.371		1	288	531.875		1	288	618.195		1	288	654.529
1	289	403.174		1	289	507.658		1	289	605.061		1	289	651.157
1	290	395.426		1	290	482.29		1	290	631.551		1	290	655.108
1	291	420.21		1	291	476.735		1	291	615.539		1	291	653.225
1	292	411.816		1	292	481.407		1	292	596.736		1	292	631.461
1	293	403.493		1	293	478.179		1	293	639.819		1	293	631.745
1	294	408.265		1	294	501.534		1	294	606.062		1	294	658.096
1	295	430.797		1	295	477.399		1	295	599.437		1	295	664.786
1	296	388.747		1	296	494.984		1	296	626.917		1	296	652.799
1	297	413.754		1	297	498.743		1	297	619.937		1	297	653.209
1	298	388.234		1	298	481.364		1	298	608.739		1	298	661.159
1	299	421.863		1	299	489.955		1	299	609.715		1	299	659.89
2	0	409.103		2	0	508.85		2	0	565.565		2	0	676.836
2	1	409.67		2	1	508.879		2	1	617.141		2	1	684.74
2	2	406.528		2	2	479.42		2	2	585.709		2	2	642.035
2	3	414.558		2	3	498.526		2	3	601.924		2	3	653.437
2	4	408.047		2	4	502.495		2	4	579.698		2	4	662.313
2	5	402.657		2	5	498.618		2	5	588.837		2	5	672.556
2	6	411.252		2	6	507.66		2	6	604.74		2	6	676.659
2	7	409.765		2	7	521.535		2	7	599.591		2	7	655.047
2	8	430.635		2	8	523.152		2	8	593.074		2	8	657.727
2	9	397.04		2	9	500.361		2	9	591.798		2	9	682.41
2	10	397.778		2	10	500.028		2	10	613.453		2	10	653.194
2	11	425.2		2	11	516.86		2	11	579.53		2	11	661.499
2	12	404.684		2	12	509.419		2	12	593.508		2	12	672.225
2	13	418.756		2	13	500.152		2	13	594.487		2	13	667.089
2	14	418.077		2	14	483.737		2	14	603.016		2	14	675.775
2	15	417.412		2	15	520.589		2	15	604.899		2	15	669.485
2	16	397.412		2	16	498.114		2	16	602.147		2	16	675.154
2	17	409.009		2	17	536.756		2	17	617.911		2	17	651.912
2	18	403.684		2	18	509.71		2	18	601.601		2	18	663.002
2	19	408.884		2	19	493.61		2	19	588.11		2	19	647.993
2	20	397.764		2	20	491.489		2	20	625.356		2	20	651.892
2	21	415.483		2	21	545.032		2	21	604.317		2	21	676.411
2	22	401.301		2	22	522.352		2	22	592.6		2	22	647.405
2	23	396.167		2	23	490.083		2	23	595.234		2	23	664.936
2	24	414.786		2	24	516.657		2	24	581.548		2	24	677.781
2	25	412.578		2	25	510.629		2	25	611.49		2	25	662.394
2	26	401.889		2	26	518.61		2	26	582.896		2	26	688.129
2	27	409.493		2	27	508.48		2	27	583.39		2	27	650.993
2	28	424.456		2	28	507.89		2	28	604.757		2	28	660.734
2	29	412.105		2	29	508.129		2	29	615.951		2	29	681.283
2	30	387.418		2	30	528.522		2	30	600.88		2	30	668.702
2	31	415.942		2	31	511.316		2	31	571.846		2	31	651.336
2	32	417.838		2	32	497.307		2	32	582.524		2	32	681.715
2	33	400.689		2	33	501.238		2	33	592.439		2	33	680.7
2	34	394.809		2	34	505.116		2	34	601.954		2	34	675.534
2	35	405.71		2	35	501.808		2	35	583.333		2	35	648.488
2	36	426.356		2	36	509.043		2	36	597.874		2	36	684.316
2	37	418.007		2	37	497.579		2	37	594.09		2	37	646.066
2	38	426.288		2	38	512.312		2	38	589.892		2	38	670.609
2	39	400.055		2	39	524.639		2	39	582.882		2	39	676.825
2	40	408.54		2	40	504.655		2	40	601.875		2	40	678.099
2	41	390.03		2	41	493.594		2	41	588.561		2	41	670.295
2	42	398.737		2	42	521.719		2	42	586.048		2	42	668.639
2	43	414.026		2	43	493.003		2	43	595.368		2	43	680.763
2	44	404.629		2	44	489.995		2	44	592.591		2	44	680.245
2	45	417.831		2	45	534.637		2	45	552.77		2	45	694.007
2	46	423.386		2	46	516.295		2	46	613.901		2	46	652.787
2	47	400.355		2	47	497.16		2	47	607.284		2	47	683.177
2	48	433.673		2	48	538.656		2	48	600.769		2	48	656.106
2	49	395.981		2	49	502.984		2	49	563.914		2	49	660.392
2	50	397.697		2	50	499.65		2	50	587.162		2	50	659.437
2	51	406.557		2	51	512.203		2	51	603.054		2	51	659.948
2	52	403.274		2	52	492.745		2	52	610.994		2	52	655.403
2	53	408.936		2	53	515.246		2	53	592.872		2	53	679.286
2	54	408.959		2	54	526.545		2	54	598.225		2	54	697.448
2	55	386.272		2	55	537.91		2	55	586.404		2	55	694.303
2	56	405.309		2	56	532.502		2	56	599.512		2	56	687.296
2	57	396.241		2	57	514.133		2	57	612.368		2	57	641.672
2	58	405.514		2	58	497.438		2	58	600.76		2	58	663.175
2	59	412.017		2	59	519.241		2	59	606.601		2	59	658.164
2	60	416.35		2	60	519.259		2	60	598.357		2	60	661.971
2	61	396.052		2	61	532.893		2	61	593.905		2	61	691.159
2	62	417.277		2	62	507.078		2	62	601.033		2	62	671.98
2	63	385.977		2	63	505.294		2	63	594.692		2	63	647.112
2	64	399.354		2	64	513.13		2	64	602.996		2	64	676.843
2	65	406.627		2	65	509.49		2	65	600.714		2	65	669.486
2	66	390.42		2	66	510.602		2	66	576.976		2	66	683.082
2	67	401.261		2	67	511.04		2	67	586.628		2	67	648.224
2	68	414.036		2	68	513.944		2	68	584.863		2	68	639.993
2	69	417.615		2	69	514.817		2	69	621.327		2	69	659.615
2	70	417.396		2	70	506.144		2	70	613.598		2	70	663.08
2	71	393.661		2	71	501.932		2	71	590.758		2	71	677.738
2	72	412.099		2	72	491.248		2	72	615.459		2	72	666.085
2	73	403.41		2	73	486.603		2	73	574.797		2	73	655.517
2	74	406.25		2	74	501.693		2	74	600.367		2	74	649.713
2	75	397.651		2	75	510.978		2	75	597.202		2	75	696.302
2	76	412.462		2	76	494.606		2	76	618.526		2	76	659.68
2	77	414.631		2	77	521.007		2	77	569.957		2	77	678.309
2	78	389.617		2	78	505.746		2	78	593.015		2	78	636.101
2	79	402.786		2	79	492.792		2	79	617.892		2	79	654.765
2	80	414.611		2	80	517.983		2	80	615.011		2	80	662.708
2	81	402.08		2	81	508.936		2	81	600.375		2	81	662.624
2	82	392.89		2	82	516.049		2	82	610.986		2	82	685.946
2	83	415.565		2	83	510.69		2	83	593.389		2	83	650.814
2	84	420.139		2	84	505.188		2	84	583.75		2	84	637.712
2	85	423.538		2	85	509.421		2	85	595.939		2	85	658.382
2	86	391.244		2	86	510.481		2	86	600.734		2	86	714.723
2	87	415.291		2	87	498.66		2	87	608.466		2	87	665.863
2	88	405.4		2	88	500.909		2	88	585.713		2	88	676.814
2	89	424.48		2	89	498.469		2	89	604.446		2	89	673.919
2	90	416.038		2	90	501.911		2	90	612.857		2	90	651.303
2	91	416.556		2	91	541.095		2	91	571.717		2	91	644.25
2	92	384.4		2	92	495.888		2	92	596.243		2	92	654.959
2	93	403.859		2	93	510.479		2	93	608.329		2	93	668.431
2	94	402.154		2	94	497.254		2	94	595.48		2	94	686.596
2	95	418.996		2	95	514.782		2	95	582.675		2	95	646.015
2	96	385.912		2	96	509		2	96	591.775		2	96	660.678
2	97	407.184		2	97	515.882		2	97	589.297		2	97	672.827
2	98	399.143		2	98	518.29		2	98	620.234		2	98	651.038
2	99	381.446		2	99	530.697		2	99	586.886		2	99	673.469
2	100	402.81		2	100	508.257		2	100	602.103		2	100	661.071
2	101	422.55		2	101	522.478		2	101	587.437		2	101	670.08
2	102	395.15		2	102	506.052		2	102	595.362		2	102	662.07
2	103	399.344		2	103	501.839		2	103	599.56		2	103	649.775
2	104	399.395		2	104	504.55		2	104	582.626		2	104	683.409
2	105	429.179		2	105	510.708		2	105	589.209		2	105	666.518
2	106	382.831		2	106	504.89		2	106	576.156		2	106	683.885
2	107	412.762		2	107	506.837		2	107	617.686		2	107	644.025
2	108	408.89		2	108	509.258		2	108	606.144		2	108	660.966
2	109	423.651		2	109	507.176		2	109	598.93		2	109	687.356
2	110	397.58		2	110	502.867		2	110	610.952		2	110	677.073
2	111	415.144		2	111	508.165		2	111	587.926		2	111	681.754
2	112	424.614		2	112	506.783		2	112	609.265		2	112	678.329
2	113	401.262		2	113	536.8		2	113	586.127		2	113	653.602
2	114	427.327		2	114	486.731		2	114	614.049		2	114	649.629
2	115	390.104		2	115	498.279		2	115	584.868		2	115	654.236
2	116	415.92		2	116	502.731		2	116	582.913		2	116	670.02
2	117	385.763		2	117	511.282		2	117	613.528		2	117	635.578
2	118	395.833		2	118	512.492		2	118	606.871		2	118	655.806
2	119	422.019		2	119	508.735		2	119	575.607		2	119	676.523
2	120	414.885		2	120	491.12		2	120	582.083		2	120	663.861
2	121	398.353		2	121	518.025		2	121	589.363		2	121	677.77
2	122	397.124		2	122	507.24		2	122	584.144		2	122	644.145
2	123	412.692		2	123	496.809		2	123	589.186		2	123	671.638
2	124	406.692		2	124	516.923		2	124	609.884		2	124	668.295
2	125	419.778		2	125	509.665		2	125	605.701		2	125	649.128
2	126	406.189		2	126	521.403		2	126	586.454		2	126	667.141
2	127	416.284		2	127	525.246		2	127	590.78		2	127	673.28
2	128	384.16		2	128	500.112		2	128	594.863		2	128	669.597
2	129	404.197		2	129	509.045		2	129	603.027		2	129	656.739
2	130	420.031		2	130	498.333		2	130	585.821		2	130	664.989
2	131	414.147		2	131	500.335		2	131	607.317		2	131	642.349
2	132	412.561		2	132	516.128		2	132	590.531		2	132	657.026
2	133	418.09		2	133	517.911		2	133	609.626		2	133	684.396
2	134	422.43		2	134	497.254		2	134	594.304		2	134	659.776
2	135	414.4		2	135	520.214		2	135	569.189		2	135	672.152
2	136	409.802		2	136	516.821		2	136	622.13		2	136	666.736
2	137	406.967		2	137	518.029		2	137	627.56		2	137	664.322
2	138	408.172		2	138	511.506		2	138	585.411		2	138	663.17
2	139	407.721		2	139	522.688		2	139	642.643		2	139	669.935
2	140	427.362		2	140	494.339		2	140	602.248		2	140	667.845
2	141	414.28		2	141	515.957		2	141	582.342		2	141	665.313
2	142	410.421		2	142	516.082		2	142	588.723		2	142	676.236
2	143	412.949		2	143	502.717		2	143	594.091		2	143	676.599
2	144	418.372		2	144	488.713		2	144	565.467		2	144	675.526
2	145	400.292		2	145	522.828		2	145	596.985		2	145	669.985
2	146	398.812		2	146	506.399		2	146	585.578		2	146	658.163
2	147	416.558		2	147	496.206		2	147	595.449		2	147	671.563
2	148	408.198		2	148	505.454		2	148	577.615		2	148	665.814
2	149	405.192		2	149	510.775		2	149	604.996		2	149	675.728
2	150	409.518		2	150	520.824		2	150	570.707		2	150	633.079
2	151	409.577		2	151	497.206		2	151	597.304		2	151	678.044
2	152	403.932		2	152	490.878		2	152	592.474		2	152	670.022
2	153	407.913		2	153	520.309		2	153	606.785		2	153	635.89
2	154	421.684		2	154	477.736		2	154	622.892		2	154	657.213
2	155	406.625		2	155	510.36		2	155	587.613		2	155	669.79
2	156	408.57		2	156	519.308		2	156	594.186		2	156	715.282
2	157	422.138		2	157	529.295		2	157	620.595		2	157	677.481
2	158	430.322		2	158	523.596		2	158	592.184		2	158	680.662
2	159	417.563		2	159	509.421		2	159	596.138		2	159	661.326
2	160	420.758		2	160	492.846		2	160	580.325		2	160	682.024
2	161	402.416		2	161	491.778		2	161	617.522		2	161	697.8
2	162	411.645		2	162	499.749		2	162	600.086		2	162	660.038
2	163	421.702		2	163	502.141		2	163	603.969		2	163	668.081
2	164	402.629		2	164	512.039		2	164	582.11		2	164	683.529
2	165	394.668		2	165	502.188		2	165	588.892		2	165	687.1
2	166	429.573		2	166	511.887		2	166	614.446		2	166	683.799
2	167	388.047		2	167	519.86		2	167	602.917		2	167	679.467
2	168	389.535		2	168	512.147		2	168	580.219		2	168	663.395
2	169	410.926		2	169	521.96		2	169	592.004		2	169	666.348
2	170	434.346		2	170	521.157		2	170	618.537		2	170	642.316
2	171	409.975		2	171	514.02		2	171	580.505		2	171	703.227
2	172	415.114		2	172	504.004		2	172	574.566		2	172	650.45
2	173	396.773		2	173	496.011		2	173	588.53		2	173	692.144
2	174	423.889		2	174	487.163		2	174	590.407		2	174	680.926
2	175	408.208		2	175	494.578		2	175	592.148		2	175	677.854
2	176	394.647		2	176	509.51		2	176	598.831		2	176	665.686
2	177	402.166		2	177	511.671		2	177	585.057		2	177	669.743
2	178	409.784		2	178	507.97		2	178	601.552		2	178	663.472
2	179	427.684		2	179	509.325		2	179	595.923		2	179	630.976
2	180	410.074		2	180	514.332		2	180	566.071		2	180	661.381
2	181	413.478		2	181	512.269		2	181	587.855		2	181	664.138
2	182	400.912		2	182	510.634		2	182	588.784		2	182	668.579
2	183	422.828		2	183	518.678		2	183	588.67		2	183	666.505
2	184	372.615		2	184	522.25		2	184	588.749		2	184	655.477
2	185	398.588		2	185	503.75		2	185	610.953		2	185	661.357
2	186	397.848		2	186	497.639		2	186	606.613		2	186	678.691
2	187	428.609		2	187	524.586		2	187	574.228		2	187	613.928
2	188	396.063		2	188	498.538		2	188	590.923		2	188	661.652
2	189	408.494		2	189	497.208		2	189	609.854		2	189	666.221
2	190	394.594		2	190	526.897		2	190	599.987		2	190	692.214
2	191	401.499		2	191	508.494		2	191	605.306		2	191	677.94
2	192	396.348		2	192	518.039		2	192	589.327		2	192	649.14
2	193	394.223		2	193	514.552		2	193	598.642		2	193	670.362
2	194	409.734		2	194	512.788		2	194	590.823		2	194	664.427
2	195	412.215		2	195	517.277		2	195	589.181		2	195	688.017
2	196	395.911		2	196	501.018		2	196	603.138		2	196	670.38
2	197	403.678		2	197	483.45		2	197	542.316		2	197	673.305
2	198	375.479		2	198	501.625		2	198	613.63		2	198	681.278
2	199	407.641		2	199	535.288		2	199	626.192		2	199	679.946
2	200	426.399		2	200	510.681		2	200	614.958		2	200	681.149
2	201	410.45		2	201	531.543		2	201	589.811		2	201	692.562
2	202	431.027		2	202	506.318		2	202	578.388		2	202	670.796
2	203	407.53		2	203	502.707		2	203	601.756		2	203	613.008
2	204	390.276		2	204	530.999		2	204	622.645		2	204	694.951
2	205	406.055		2	205	498.479		2	205	628.371		2	205	632.291
2	206	412.299		2	206	503.883		2	206	579.515		2	206	676.703
2	207	391.157		2	207	490.41		2	207	568.023		2	207	636.963
2	208	429.625		2	208	521.207		2	208	558.04		2	208	665.918
2	209	431.309		2	209	530.823		2	209	595.35		2	209	664.546
2	210	400.399		2	210	527.245		2	210	596.574		2	210	641.998
2	211	405.133		2	211	501.786		2	211	611.367		2	211	625.992
2	212	411.726		2	212	522.515		2	212	579.147		2	212	693.555
2	213	394.914		2	213	490.165		2	213	609.755		2	213	656.333
2	214	389.518		2	214	502.133		2	214	584.087		2	214	687.764
2	215	391.815		2	215	503.908		2	215	618.032		2	215	672.444
2	216	387.184		2	216	514.393		2	216	604.177		2	216	672.711
2	217	411.503		2	217	529.432		2	217	613.172		2	217	648.646
2	218	410.582		2	218	497.875		2	218	602.446		2	218	650.227
2	219	376.164		2	219	497.972		2	219	603.452		2	219	685.356
2	220	417.618		2	220	505.982		2	220	599.865		2	220	646.271
2	221	404.973		2	221	519.038		2	221	600.19		2	221	670.404
2	222	418.494		2	222	505.231		2	222	615.348		2	222	683.227
2	223	389.183		2	223	513.99		2	223	586.771		2	223	699.074
2	224	428.691		2	224	508.774		2	224	600.442		2	224	682.01
2	225	396.039		2	225	506.934		2	225	578.929		2	225	649.537
2	226	398.67		2	226	515.261		2	226	579.27		2	226	640.969
2	227	426.612		2	227	507.621		2	227	607.56		2	227	655.301
2	228	406.358		2	228	500.957		2	228	607.085		2	228	670.656
2	229	424.654		2	229	504.291		2	229	601.84		2	229	681.629
2	230	375.141		2	230	523.464		2	230	564.966		2	230	653.963
2	231	409.993		2	231	499.383		2	231	614.361		2	231	668.888
2	232	408.512		2	232	506.533		2	232	586.501		2	232	647.805
2	233	393.348		2	233	518.159		2	233	596.401		2	233	682.317
2	234	397.726		2	234	519.286		2	234	584.175		2	234	696.77
2	235	400.971		2	235	521.379		2	235	608.538		2	235	671.466
2	236	396.57		2	236	524.19		2	236	596.11		2	236	689.414
2	237	396.148		2	237	544.574		2	237	607.119		2	237	664.189
2	238	421.211		2	238	499.566		2	238	615.511		2	238	680.127
2	239	412.83		2	239	497.448		2	239	608.603		2	239	683.486
2	240	411.433		2	240	509.274		2	240	594.118		2	240	683.167
2	241	402.089		2	241	481.091		2	241	609.988		2	241	694.759
2	242	398.58		2	242	509.471		2	242	603.439		2	242	654.374
2	243	399.897		2	243	505.775		2	243	596.479		2	243	668.712
2	244	398.284		2	244	503.532		2	244	576.918		2	244	698.389
2	245	415.579		2	245	529.974		2	245	603.958		2	245	646.068
2	246	413.819		2	246	489.719		2	246	605.823		2	246	633.566
2	247	420.467		2	247	526.784		2	247	593.32		2	247	651.903
2	248	413.177		2	248	478.979		2	248	610.84		2	248	680.209
2	249	396.588		2	249	510.577		2	249	596.274		2	249	668.587
2	250	410.618		2	250	526.427		2	250	607.745		2	250	674.23
2	251	407.637		2	251	495.049		2	251	583.43		2	251	667.684
2	252	399.91		2	252	507.439		2	252	585.858		2	252	663.558
2	253	408.548		2	253	499.737		2	253	599.957		2	253	653.741
2	254	409.259		2	254	517.374		2	254	605.041		2	254	651.502
2	255	413.884		2	255	490.853		2	255	610.907		2	255	677.009
2	256	395.951		2	256	515.515		2	256	597.965		2	256	664.267
2	257	421.581		2	257	498.456		2	257	603.753		2	257	691.678
2	258	416.166		2	258	511.582		2	258	601.185		2	258	679.371
2	259	391.583		2	259	503.19		2	259	591.55		2	259	678.295
2	260	399.975		2	260	511.75		2	260	580.462		2	260	645.449
2	261	404.078		2	261	502.797		2	261	591.657		2	261	669.669
2	262	387.741		2	262	501.87		2	262	606.67		2	262	665.279
2	263	389.416		2	263	499.689		2	263	601.994		2	263	642.582
2	264	422.337		2	264	501.966		2	264	601.461		2	264	660.777
2	265	389.794		2	265	511.208		2	265	621.235		2	265	673.302
2	266	408.806		2	266	518.984		2	266	579.28		2	266	669.294
2	267	410.183		2	267	522.216		2	267	603.11		2	267	684.004
2	268	418.571		2	268	527.573		2	268	611.218		2	268	676.901
2	269	409.924		2	269	512.087		2	269	600.444		2	269	639.076
2	270	428.29		2	270	504.137		2	270	594.735		2	270	666.194
2	271	414.328		2	271	511.772		2	271	604.157		2	271	669.117
2	272	393.804		2	272	515.419		2	272	614.749		2	272	652.184
2	273	433.722		2	273	533.211		2	273	574.201		2	273	683.782
2	274	390.799		2	274	533.739		2	274	599.58		2	274	671.251
2	275	417.287		2	275	495.524		2	275	579.165		2	275	684.574
2	276	413.589		2	276	503.442		2	276	565.962		2	276	695.683
2	277	399.316		2	277	490.078		2	277	591.324		2	277	670.245
2	278	389.693		2	278	496.076		2	278	605.02		2	278	639.573
2	279	411.802		2	279	491.505		2	279	611.108		2	279	685.998
2	280	434.589		2	280	501.567		2	280	587.454		2	280	644.758
2	281	422.243		2	281	499.387		2	281	593.906		2	281	653.425
2	282	428.507		2	282	500.066		2	282	593.787		2	282	675.88
2	283	404.698		2	283	522.418		2	283	588.874		2	283	672.267
2	284	419.362		2	284	523.488		2	284	601.846		2	284	670.62
2	285	417.636		2	285	503.396		2	285	590.136		2	285	681.723
2	286	403.847		2	286	493.297		2	286	586.377		2	286	666.429
2	287	410.843		2	287	492.62		2	287	597.501		2	287	672.81
2	288	414.951		2	288	495.563		2	288	597.459		2	288	654.88
2	289	397.956		2	289	511.128		2	289	601.724		2	289	658.348
2	290	418.46		2	290	511.463		2	290	590.732		2	290	687.004
2	291	396.443		2	291	517.37		2	291	588.527		2	291	645.126
2	292	393.957		2	292	534.672		2	292	584.586		2	292	658.342
2	293	411.986		2	293	531.613		2	293	606.203		2	293	647.209
2	294	404.441		2	294	499.414		2	294	595.379		2	294	668.283
2	295	421.367		2	295	499.424		2	295	616.364		2	295	659.496
2	296	391.7		2	296	505.053		2	296	576.353		2	296	665.922
2	297	406.292		2	297	523.94		2	297	567.799		2	297	670.992
2	298	388.201		2	298	503.675		2	298	572.162		2	298	681.204
2	299	428.476		2	299	503.34		2	299	611.997		2	299	670.645
3	0	401.35		3	0	515.434		3	0	615.14		3	0	665.735
3	1	404.056		3	1	521.326		3	1	591.405		3	1	661.099
3	2	420.864		3	2	524.604		3	2	607.015		3	2	659.997
3	3	399.07		3	3	510.389		3	3	586.026		3	3	682.686
3	4	401.532		3	4	504.49		3	4	594.117		3	4	671.391
3	5	403.311		3	5	506.179		3	5	604.868		3	5	642.424
3	6	407.118		3	6	505.51		3	6	598.844		3	6	678.221
3	7	417.677		3	7	515.754		3	7	608.877		3	7	668.323
3	8	410.062		3	8	520.027		3	8	587.221		3	8	682.508
3	9	393.835		3	9	524.23		3	9	612.951		3	9	666.507
3	10	399.458		3	10	496.216		3	10	620.017		3	10	666.047
3	11	409.192		3	11	520.86		3	11	592.134		3	11	661.545
3	12	422.039		3	12	505.128		3	12	613.305		3	12	641.302
3	13	404.783		3	13	502.699		3	13	601.463		3	13	690.311
3	14	410.668		3	14	513.655		3	14	591.162		3	14	681.887
3	15	399.992		3	15	503.475		3	15	598.678		3	15	664.686
3	16	401.85		3	16	502.71		3	16	612.703		3	16	682.73
3	17	420.21		3	17	525.423		3	17	590.21		3	17	659.536
3	18	419.726		3	18	517.568		3	18	597.698		3	18	651.571
3	19	409.395		3	19	506.035		3	19	600.382		3	19	682.131
3	20	415.763		3	20	519.729		3	20	586.161		3	20	652.271
3	21	424.376		3	21	497.841		3	21	581.568		3	21	691.171
3	22	392.683		3	22	527.139		3	22	597.25		3	22	635.602
3	23	425.601		3	23	521.596		3	23	578.592		3	23	664.22
3	24	407.528		3	24	498.392		3	24	579.453		3	24	652.756
3	25	426.182		3	25	480.447		3	25	598.003		3	25	639.317
3	26	429.33		3	26	530.535		3	26	596.408		3	26	665.098
3	27	407.709		3	27	496.877		3	27	589.592		3	27	679.595
3	28	411.856		3	28	497.895		3	28	604.078		3	28	672.734
3	29	401.539		3	29	501.959		3	29	565.952		3	29	647.423
3	30	416.188		3	30	510.212		3	30	594.033		3	30	668.824
3	31	409.192		3	31	498.508		3	31	598.989		3	31	649.077
3	32	416.484		3	32	504.771		3	32	615.483		3	32	654.498
3	33	394.65		3	33	524.081		3	33	620.148		3	33	644.051
3	34	414.816		3	34	504.651		3	34	581.835		3	34	667.362
3	35	412.104		3	35	507.149		3	35	586.53		3	35	666.295
3	36	405.098		3	36	499.755		3	36	625.959		3	36	653.313
3	37	415.67		3	37	518.161		3	37	624.706		3	37	688.139
3	38	425.782		3	38	496.671		3	38	599.794		3	38	645.092
3	39	394.02		3	39	523.915		3	39	591.668		3	39	648.291
3	40	401.912		3	40	504.137		3	40	589.995		3	40	668.437
3	41	404.025		3	41	527.744		3	41	606.989		3	41	681.68
3	42	402.428		3	42	500.263		3	42	595.061		3	42	692.235
3	43	405.119		3	43	519.194		3	43	600.402		3	43	652.723
3	44	402.665		3	44	539.331		3	44	586.864		3	44	663.464
3	45	398.303		3	45	501.712		3	45	606.619		3	45	679.152
3	46	403.508		3	46	518.732		3	46	596.848		3	46	667.102
3	47	382.863		3	47	525.596		3	47	601.645		3	47	665.795
3	48	406.659		3	48	519.597		3	48	590.716		3	48	668.959
3	49	406.527		3	49	505.658		3	49	588.856		3	49	670.071
3	50	405.168		3	50	507.399		3	50	612.86		3	50	657.314
3	51	400.858		3	51	514.662		3	51	591.655		3	51	651.315
3	52	400.125		3	52	513.811		3	52	605.647		3	52	669.131
3	53	385.154		3	53	535.926		3	53	598.478		3	53	683.049
3	54	402.428		3	54	514.866		3	54	615.04		3	54	661.017
3	55	414.603		3	55	511.865		3	55	591.791		3	55	649.115
3	56	400.286		3	56	503.57		3	56	592.197		3	56	672.101
3	57	385.433		3	57	501.68		3	57	584.753		3	57	654.721
3	58	429.302		3	58	520.05		3	58	619.947		3	58	681.14
3	59	422.18		3	59	505.82		3	59	594.642		3	59	669.11
3	60	411.707		3	60	518.163		3	60	602.395		3	60	656.54
3	61	406.097		3	61	498.178		3	61	584.639		3	61	664.32
3	62	403.619		3	62	496.255		3	62	618.816		3	62	672.497
3	63	413.896		3	63	520.419		3	63	606.069		3	63	650.36
3	64	406.94		3	64	498.784		3	64	627.217		3	64	673.669
3	65	409.762		3	65	514.685		3	65	589.31		3	65	692.306
3	66	399.216		3	66	500.735		3	66	631.028		3	66	670.862
3	67	391.864		3	67	521.795		3	67	597.59		3	67	706.767
3	68	405.729		3	68	523.44		3	68	611.991		3	68	670.25
3	69	419.603		3	69	503.849		3	69	609.841		3	69	677.966
3	70	389.205		3	70	531.889		3	70	600.934		3	70	670.387
3	71	403.583		3	71	528.319		3	71	581.735		3	71	643.949
3	72	395.462		3	72	502.534		3	72	606.632		3	72	664.372
3	73	395.798		3	73	490.263		3	73	606.434		3	73	709.353
3	74	388.01		3	74	519.992		3	74	604.084		3	74	649.095
3	75	381.699		3	75	502.743		3	75	574.693		3	75	657.347
3	76	405.275		3	76	491.537		3	76	601.957		3	76	660.44
3	77	400.144		3	77	487.047		3	77	603.623		3	77	664.716
3	78	406.948		3	78	508.932		3	78	612.693		3	78	669.558
3	79	396.242		3	79	515.572		3	79	595.821		3	79	672.363
3	80	399.767		3	80	521.708		3	80	596.221		3	80	694.379
3	81	403.351		3	81	508.832		3	81	604.377		3	81	679.142
3	82	416.353		3	82	509.665		3	82	620.283		3	82	672.052
3	83	408.087		3	83	522.048		3	83	579.967		3	83	657.695
3	84	397.085		3	84	521.125		3	84	606.062		3	84	648.39
3	85	397.125		3	85	486.122		3	85	598.189		3	85	704.733
3	86	404.119		3	86	518.324		3	86	605.443		3	86	686.933
3	87	406.263		3	87	524.818		3	87	621.333		3	87	663.007
3	88	411.472		3	88	503.46		3	88	621.47		3	88	666.873
3	89	412.205		3	89	498.038		3	89	621.092		3	89	675.336
3	90	409.596		3	90	505.555		3	90	600.98		3	90	674.704
3	91	407.956		3	91	498.785		3	91	596.812		3	91	682.193
3	92	417.123		3	92	516.517		3	92	600.741		3	92	694.906
3	93	418.711		3	93	491.303		3	93	594.859		3	93	670.846
3	94	384.667		3	94	501.007		3	94	609.151		3	94	651.893
3	95	396.82		3	95	492.297		3	95	587.946		3	95	629.895
3	96	405.874		3	96	530.273		3	96	609.945		3	96	673.523
3	97	417.07		3	97	515.245		3	97	588.669		3	97	669.378
3	98	389.771		3	98	495.666		3	98	593.859		3	98	670.859
3	99	411.131		3	99	487.945		3	99	612.107		3	99	680.379
3	100	385.954		3	100	511.747		3	100	591.751		3	100	672.425
3	101	383.194		3	101	517.13		3	101	603.442		3	101	659.898
3	102	429.419		3	102	522.048		3	102	608.891		3	102	656.832
3	103	410.841		3	103	496.633		3	103	603.385		3	103	631.321
3	104	397.25		3	104	498.42		3	104	611.471		3	104	657.597
3	105	415.621		3	105	522.01		3	105	600.014		3	105	668.031
3	106	412.972		3	106	502.653		3	106	611.807		3	106	658.956
3	107	406.817		3	107	524.725		3	107	596.29		3	107	659.426
3	108	400.385		3	108	523.833		3	108	594		3	108	671.112
3	109	408.357		3	109	511.018		3	109	611.453		3	109	647.464
3	110	410.678		3	110	512.081		3	110	601.675		3	110	642.856
3	111	420.768		3	111	505.071		3	111	629.528		3	111	683.87
3	112	413.228		3	112	503.903		3	112	598.229		3	112	658.93
3	113	407.521		3	113	539.267		3	113	585.923		3	113	668.731
3	114	414.36		3	114	485.496		3	114	603.3		3	114	654.25
3	115	380.314		3	115	527.874		3	115	605.449		3	115	667.997
3	116	402.087		3	116	474.677		3	116	600.832		3	116	657.701
3	117	410.059		3	117	493.425		3	117	598.558		3	117	676.373
3	118	394.84		3	118	519.964		3	118	576.899		3	118	681.699
3	119	416.171		3	119	506.546		3	119	585.34		3	119	680.299
3	120	419.263		3	120	500.268		3	120	617.106		3	120	666.837
3	121	396.894		3	121	508.626		3	121	590.803		3	121	643.681
3	122	397.028		3	122	535.796		3	122	601.03		3	122	655.478
3	123	386.416		3	123	506.438		3	123	612.574		3	123	701.999
3	124	391.389		3	124	520.296		3	124	585.131		3	124	669.598
3	125	398.469		3	125	499.29		3	125	598.706		3	125	654.418
3	126	408.939		3	126	512.682		3	126	580.301		3	126	668.193
3	127	418.6		3	127	508.075		3	127	586.97		3	127	674.236
3	128	403.324		3	128	500.89		3	128	592.984		3	128	673.619
3	129	399.178		3	129	520.545		3	129	618.32		3	129	653.361
3	130	421.547		3	130	501.773		3	130	587.229		3	130	651.973
3	131	410.433		3	131	544.16		3	131	594.44		3	131	657.799
3	132	403.693		3	132	509.004		3	132	601.264		3	132	660.315
3	133	396.488		3	133	526.119		3	133	602.78		3	133	675.522
3	134	415.954		3	134	504.229		3	134	616.159		3	134	657.109
3	135	409.828		3	135	519.721		3	135	609.447		3	135	663.809
3	136	416.294		3	136	523.614		3	136	567.079		3	136	665.359
3	137	413.504		3	137	522.906		3	137	587.774		3	137	669.623
3	138	393.551		3	138	509.39		3	138	602.35		3	138	654.713
3	139	384.486		3	139	529.88		3	139	594.414		3	139	686.406
3	140	377.981		3	140	509.385		3	140	597.022		3	140	665.934
3	141	407.22		3	141	509.024		3	141	606.783		3	141	667.921
3	142	410.42		3	142	495.314		3	142	598.86		3	142	653.4
3	143	413.584		3	143	512.878		3	143	587.808		3	143	693.163
3	144	411.818		3	144	516.341		3	144	573.408		3	144	665.823
3	145	387.132		3	145	536.82		3	145	605.009		3	145	680.505
3	146	412.993		3	146	526.944		3	146	599.412		3	146	680.297
3	147	408.068		3	147	546.999		3	147	602.954		3	147	667.123
3	148	388.189		3	148	508.07		3	148	589.522		3	148	657.854
3	149	405.794		3	149	506.694		3	149	579.273		3	149	666.84
3	150	394.598		3	150	517.789		3	150	589.563		3	150	645.84
3	151	392.429		3	151	490.451		3	151	608.309		3	151	648.308
3	152	410.09		3	152	513.453		3	152	599.797		3	152	678.843
3	153	404.457		3	153	511.833		3	153	600.085		3	153	664.155
3	154	401.496		3	154	495.816		3	154	594.544		3	154	648.485
3	155	410.824		3	155	521.171		3	155	589.611		3	155	669.6
3	156	386.353		3	156	509.344		3	156	590.619		3	156	667.75
3	157	409.328		3	157	508.287		3	157	627.623		3	157	698.508
3	158	416.958		3	158	514.55		3	158	625.182		3	158	689.773
3	159	404.585		3	159	509.312		3	159	605.755		3	159	668.814
3	160	415.506		3	160	512.022		3	160	625.533		3	160	641.422
3	161	405.236		3	161	541.545		3	161	601.95		3	161	688.058
3	162	386.074		3	162	507.993		3	162	600.638		3	162	647.109
3	163	411.835		3	163	517.362		3	163	601.808		3	163	669.184
3	164	405.33		3	164	501.662		3	164	582.929		3	164	662.104
3	165	398.507		3	165	529.172		3	165	577.473		3	165	662.503
3	166	391.126		3	166	513.48		3	166	603.297		3	166	660.097
3	167	410.201		3	167	513.331		3	167	611.405		3	167	663.076
3	168	411.33		3	168	527.878		3	168	592.057		3	168	672.687
3	169	390.398		3	169	516.751		3	169	572.9		3	169	674.262
3	170	407.151		3	170	507.561		3	170	590.251		3	170	659.494
3	171	422.713		3	171	515.128		3	171	611.571		3	171	682.313
3	172	434.185		3	172	518.294		3	172	592.228		3	172	651.478
3	173	423.703		3	173	522.468		3	173	588.96		3	173	651.789
3	174	400.625		3	174	500.155		3	174	580.072		3	174	641.107
3	175	414.956		3	175	521.656		3	175	595.453		3	175	638.834
3	176	406.069		3	176	509.392		3	176	597.53		3	176	641.887
3	177	416.835		3	177	496.622		3	177	572.875		3	177	669.871
3	178	405.208		3	178	511.373		3	178	583.768		3	178	692.313
3	179	410.469		3	179	528.795		3	179	592.282		3	179	685.597
3	180	420.948		3	180	522.308		3	180	591.612		3	180	665.532
3	181	402.809		3	181	490.516		3	181	569.851		3	181	651.075
3	182	393.903		3	182	500.721		3	182	607.126		3	182	617.392
3	183	411.283		3	183	517.162		3	183	591.234		3	183	664.556
3	184	419.931		3	184	493.281		3	184	604.819		3	184	666.938
3	185	390.409		3	185	512.005		3	185	596.428		3	185	680.559
3	186	399.935		3	186	542.053		3	186	613.305		3	186	680.091
3	187	379.826		3	187	490.022		3	187	610.153		3	187	658.348
3	188	403.43		3	188	505.424		3	188	563.419		3	188	658.587
3	189	398.443		3	189	518.853		3	189	618.476		3	189	631.635
3	190	420.397		3	190	506.585		3	190	585.532		3	190	679.542
3	191	418.318		3	191	484.335		3	191	575.725		3	191	681.43
3	192	405.427		3	192	510.109		3	192	601.696		3	192	646.349
3	193	402.07		3	193	519.562		3	193	594.662		3	193	668.383
3	194	404.711		3	194	509.932		3	194	637.113		3	194	653.873
3	195	406.997		3	195	484.315		3	195	576.735		3	195	674.389
3	196	389.027		3	196	502.036		3	196	599.449		3	196	670.632
3	197	389.581		3	197	496.935		3	197	592.389		3	197	685.664
3	198	385.829		3	198	540.577		3	198	585.472		3	198	665.629
3	199	399.231		3	199	506.32		3	199	583.934		3	199	646.005
3	200	403.528		3	200	536.701		3	200	631.284		3	200	684.226
3	201	415.145		3	201	524.812		3	201	606.087		3	201	652.332
3	202	397.697		3	202	526.383		3	202	627.115		3	202	659.672
3	203	401.719		3	203	505.067		3	203	601.777		3	203	671.542
3	204	400.065		3	204	480.044		3	204	582.448		3	204	679.751
3	205	413.914		3	205	517.662		3	205	601.001		3	205	669.651
3	206	415.001		3	206	503.042		3	206	614.898		3	206	665.962
3	207	390.086		3	207	505.876		3	207	610.176		3	207	679.703
3	208	400.559		3	208	504.733		3	208	603.212		3	208	676.364
3	209	407.618		3	209	512.591		3	209	616.196		3	209	668.752
3	210	412.077		3	210	512.985		3	210	576.214		3	210	668.852
3	211	379.425		3	211	496.421		3	211	589.575		3	211	660.017
3	212	396.175		3	212	524.906		3	212	597.94		3	212	675.295
3	213	397.835		3	213	498.155		3	213	602.633		3	213	688.901
3	214	410.69		3	214	505.455		3	214	620.757		3	214	703.458
3	215	419.253		3	215	469.532		3	215	590.252		3	215	684.292
3	216	404.847		3	216	502.404		3	216	591.023		3	216	660.628
3	217	409.137		3	217	500.656		3	217	594.753		3	217	638.97
3	218	392.111		3	218	491.63		3	218	605.349		3	218	633.891
3	219	390.422		3	219	513.303		3	219	588.219		3	219	665.357
3	220	393.623		3	220	518.191		3	220	584.924		3	220	662.823
3	221	406.914		3	221	511.052		3	221	616.551		3	221	638.03
3	222	391.681		3	222	549.47		3	222	615.968		3	222	673.315
3	223	415.015		3	223	502.766		3	223	584.135		3	223	678.72
3	224	398.328		3	224	506.882		3	224	603.358		3	224	664.415
3	225	407.475		3	225	518.472		3	225	609.872		3	225	680.187
3	226	381.962		3	226	529.448		3	226	608.059		3	226	641.276
3	227	406.251		3	227	523.944		3	227	619.099		3	227	627.312
3	228	398.759		3	228	497.211		3	228	609.758		3	228	690.822
3	229	410.332		3	229	506.008		3	229	601.197		3	229	656.226
3	230	413.705		3	230	517.805		3	230	606.461		3	230	661.579
3	231	379.73		3	231	514.646		3	231	587.579		3	231	690.1
3	232	405.157		3	232	498.169		3	232	593.907		3	232	669.251
3	233	386.587		3	233	505.596		3	233	594.066		3	233	653.983
3	234	419.16		3	234	508.858		3	234	623.29		3	234	670.616
3	235	408.497		3	235	521.31		3	235	606.84		3	235	663.973
3	236	425.43		3	236	505.96		3	236	589.018		3	236	657.572
3	237	410.932		3	237	514.777		3	237	613.63		3	237	647.561
3	238	396.539		3	238	505.869		3	238	592.099		3	238	691.514
3	239	402.271		3	239	496.193		3	239	589.949		3	239	671.311
3	240	392.015		3	240	514.549		3	240	606.99		3	240	677.906
3	241	403.815		3	241	496.705		3	241	591.626		3	241	635.616
3	242	382.913		3	242	529.296		3	242	601.48		3	242	646.18
3	243	397.299		3	243	503.983		3	243	606.598		3	243	664.363
3	244	404.024		3	244	500.892		3	244	602.597		3	244	661.039
3	245	418.792		3	245	502.163		3	245	607.025		3	245	673.459
3	246	413.675		3	246	513.23		3	246	596.372		3	246	667.543
3	247	408.27		3	247	520.145		3	247	623.564		3	247	660.61
3	248	428.807		3	248	487.563		3	248	609.606		3	248	652.175
3	249	405.443		3	249	497.938		3	249	613.488		3	249	659.508
3	250	416.218		3	250	516.192		3	250	609.172		3	250	667.806
3	251	406.01		3	251	503.355		3	251	606.133		3	251	693.292
3	252	415.575		3	252	508.049		3	252	604.021		3	252	686.173
3	253	393.329		3	253	517.855		3	253	579.021		3	253	673.968
3	254	402.234		3	254	527.713		3	254	630.961		3	254	667.367
3	255	403.672		3	255	507.245		3	255	608.142		3	255	655.682
3	256	418.784		3	256	525.459		3	256	609.421		3	256	659.762
3	257	438.797		3	257	517.462		3	257	602.713		3	257	644.23
3	258	414.999		3	258	533.391		3	258	579.391		3	258	658.748
3	259	394.024		3	259	487.28		3	259	605.963		3	259	676.095
3	260	387.112		3	260	511.541		3	260	578.704		3	260	661.157
3	261	409.546		3	261	504.137		3	261	608.306		3	261	639.896
3	262	397.85		3	262	493.252		3	262	584.76		3	262	635.975
3	263	424.302		3	263	493.447		3	263	583.43		3	263	672.34
3	264	369.89		3	264	514.667		3	264	589.925		3	264	668.912
3	265	376.995		3	265	509.401		3	265	609.409		3	265	658.943
3	266	398.605		3	266	523.595		3	266	605.386		3	266	648.698
3	267	399.515		3	267	481.983		3	267	586.055		3	267	673.862
3	268	391.555		3	268	506.498		3	268	599.435		3	268	661.237
3	269	411.155		3	269	525.879		3	269	613.233		3	269	676.208
3	270	405.792		3	270	507.788		3	270	622.643		3	270	670.633
3	271	431.508		3	271	506.633		3	271	607.872		3	271	660.818
3	272	426.945		3	272	532.097		3	272	628.395		3	272	672.663
3	273	399.223		3	273	503.33		3	273	589.101		3	273	668.177
3	274	388.027		3	274	496.226		3	274	585.717		3	274	656.352
3	275	390.588		3	275	507.994		3	275	604.082		3	275	678.101
3	276	415.573		3	276	522.024		3	276	628.332		3	276	699.345
3	277	416.922		3	277	510.492		3	277	593.907		3	277	657.375
3	278	409.803		3	278	515.766		3	278	595.109		3	278	655.087
3	279	410.302		3	279	514.768		3	279	618.661		3	279	649.76
3	280	407.991		3	280	498.65		3	280	613.008		3	280	681.239
3	281	409.091		3	281	494.202		3	281	579.548		3	281	675.341
3	282	405.712		3	282	527.624		3	282	577.573		3	282	668.193
3	283	400.772		3	283	529.727		3	283	584.796		3	283	664.825
3	284	391.771		3	284	529.237		3	284	608.761		3	284	655.186
3	285	402.266		3	285	509.218		3	285	609.09		3	285	657.511
3	286	396.56		3	286	509.395		3	286	623.221		3	286	655.077
3	287	424.778		3	287	490.142		3	287	612.546		3	287	696.942
3	288	409.368		3	288	526.192		3	288	614.235		3	288	645.683
3	289	382.479		3	289	527.367		3	289	568.857		3	289	669.913
3	290	389.185		3	290	521.446		3	290	592.994		3	290	662.374
3	291	420.904		3	291	490.441		3	291	607.064		3	291	651.331
3	292	396.129		3	292	498.256		3	292	598.131		3	292	677.554
3	293	413.156		3	293	517.134		3	293	615.607		3	293	670.522
3	294	404.966		3	294	514.266		3	294	571.823		3	294	648.391
3	295	422.039		3	295	509.757		3	295	614.972		3	295	665.256
3	296	397.193		3	296	497.158		3	296	613.02		3	296	654.354
3	297	407.175		3	297	517.691		3	297	608.735		3	297	658.372
3	298	416.048		3	298	517.653		3	298	592.563		3	298	679.706
3	299	412.404		3	299	509.342		3	299	580.377		3	299	638.829
4	0	407.74		4	0	488.664		4	0	594.458		4	0	693.772
4	1	399.561		4	1	471.026		4	1	593.999		4	1	668.795
4	2	387.633		4	2	502.647		4	2	596.324		4	2	653.185
4	3	391.435		4	3	502.623		4	3	607.447		4	3	655.346
4	4	407.505		4	4	490.228		4	4	634.122		4	4	635.482
4	5	382.64		4	5	536.849		4	5	599.92		4	5	660.896
4	6	368.108		4	6	492.727		4	6	589.441		4	6	674.015
4	7	396.672		4	7	480.996		4	7	623.182		4	7	660.539
4	8	392.802		4	8	489.834		4	8	598.159		4	8	669.843
4	9	383.5		4	9	498.758		4	9	598.801		4	9	671.904
4	10	382.882		4	10	503.884		4	10	612.216		4	10	663.39
4	11	397.721		4	11	521.161		4	11	593.349		4	11	661.179
4	12	397.1		4	12	503.48		4	12	639.495		4	12	679.657
4	13	398.554		4	13	508.865		4	13	607.046		4	13	679.647
4	14	370.141		4	14	504.196		4	14	612.811		4	14	674.42
4	15	386.509		4	15	478.439		4	15	624.524		4	15	666.608
4	16	415.323		4	16	504.71		4	16	622.943		4	16	651.625
4	17	388.434		4	17	498.869		4	17	618.466		4	17	683.725
4	18	404.127		4	18	476.161		4	18	606.932		4	18	658.848
4	19	381.328		4	19	500.46		4	19	610.929		4	19	641.923
4	20	393.27		4	20	488.89		4	20	595.121		4	20	649.538
4	21	399.71		4	21	532.951		4	21	604.389		4	21	681.047
4	22	395.311		4	22	488.062		4	22	608.862		4	22	652.847
4	23	389.092		4	23	507.378		4	23	636.219		4	23	664.718
4	24	380.055		4	24	512.13		4	24	617.45		4	24	684.379
4	25	372.433		4	25	495.172		4	25	594.11		4	25	684.837
4	26	372.275		4	26	489.116		4	26	605.869		4	26	647.628
4	27	375.013		4	27	504.466		4	27	618.391		4	27	674.381
4	28	408.308		4	28	500.761		4	28	611.665		4	28	638.329
4	29	392.714		4	29	498.136		4	29	619.94		4	29	671.654
4	30	402.916		4	30	502.487		4	30	587.151		4	30	669.726
4	31	373.645		4	31	493.441		4	31	589.595		4	31	661.404
4	32	388.352		4	32	506.731		4	32	643.402		4	32	680.751
4	33	394.753		4	33	538.534		4	33	602.419		4	33	672.559
4	34	401.724		4	34	487.012		4	34	599.339		4	34	689.95
4	35	405.604		4	35	500.623		4	35	607.379		4	35	664.909
4	36	386.823		4	36	484.628		4	36	612.083		4	36	644.007
4	37	402.343		4	37	510.268		4	37	587.959		4	37	680.181
4	38	381.599		4	38	519.425		4	38	602.952		4	38	656.799
4	39	389.372		4	39	507.484		4	39	653.391		4	39	699.86
4	40	411.704		4	40	511.298		4	40	607.408		4	40	667.398
4	41	391.596		4	41	509.882		4	41	601.707		4	41	663.182
4	42	374.584		4	42	489.257		4	42	622.188		4	42	645.104
4	43	380.431		4	43	506.47		4	43	615.066		4	43	667.494
4	44	371.615		4	44	534.253		4	44	585.921		4	44	674.827
4	45	387.661		4	45	501.392		4	45	620.821		4	45	665.376
4	46	376.747		4	46	504.674		4	46	605.747		4	46	685.446
4	47	399.723		4	47	501.279		4	47	618.705		4	47	660.116
4	48	397.386		4	48	495.29		4	48	605.146		4	48	651.027
4	49	391.779		4	49	488.756		4	49	595.912		4	49	657.72
4	50	394.383		4	50	498.495		4	50	599.701		4	50	655.359
4	51	400.519		4	51	505.121		4	51	634.058		4	51	636.439
4	52	396.339		4	52	500.769		4	52	629.581		4	52	693.865
4	53	397.561		4	53	505.179		4	53	588.828		4	53	656.101
4	54	367.401		4	54	510.349		4	54	614.514		4	54	653.02
4	55	394.565		4	55	509.087		4	55	599.181		4	55	692.307
4	56	411.632		4	56	498.799		4	56	616.755		4	56	683.157
4	57	379.511		4	57	504.214		4	57	602.709		4	57	660.193
4	58	394.446		4	58	505.188		4	58	621.26		4	58	690.02
4	59	391.108		4	59	511.122		4	59	597.442		4	59	662.62
4	60	382.111		4	60	508.973		4	60	617.968		4	60	671.659
4	61	366.768		4	61	503.581		4	61	577.107		4	61	688.785
4	62	391.132		4	62	510.728		4	62	615.1		4	62	654.209
4	63	399.522		4	63	494.071		4	63	600.349		4	63	664.637
4	64	385.747		4	64	495.45		4	64	606.147		4	64	669.079
4	65	392.892		4	65	514.381		4	65	589.263		4	65	666.05
4	66	388.046		4	66	497.383		4	66	598.54		4	66	657.679
4	67	407.567		4	67	501.775		4	67	627.438		4	67	658.969
4	68	394.43		4	68	489.014		4	68	596.165		4	68	675.091
4	69	397.434		4	69	511.649		4	69	600.016		4	69	662.149
4	70	370.886		4	70	497.998		4	70	619.726		4	70	681.271
4	71	388.914		4	71	516.518		4	71	605.265		4	71	649.001
4	72	401.49		4	72	509.086		4	72	612.095		4	72	645.212
4	73	395.04		4	73	505.349		4	73	611.926		4	73	652.233
4	74	377.924		4	74	509.405		4	74	623.05		4	74	671.632
4	75	404.216		4	75	502.264		4	75	609.034		4	75	679.707
4	76	373.828		4	76	496.233		4	76	632.002		4	76	675.455
4	77	421.925		4	77	493.098		4	77	617.295		4	77	683.211
4	78	394.128		4	78	508.941		4	78	626.61		4	78	665.155
4	79	382.897		4	79	513.605		4	79	608.657		4	79	665.28
4	80	385.354		4	80	492.818		4	80	587.84		4	80	655.992
4	81	394.767		4	81	498.966		4	81	629.725		4	81	656.08
4	82	388.121		4	82	508.787		4	82	596.223		4	82	683.206
4	83	380.803		4	83	488.854		4	83	594.403		4	83	685.311
4	84	388.672		4	84	495.963		4	84	622.724		4	84	667.725
4	85	389.993		4	85	493.203		4	85	597.958		4	85	658.983
4	86	381.888		4	86	500.163		4	86	599.919		4	86	685.31
4	87	389.166		4	87	527.199		4	87	616.62		4	87	668.397
4	88	383.083		4	88	510.017		4	88	597.622		4	88	650.669
4	89	396.509		4	89	494.283		4	89	601.759		4	89	657.186
4	90	401.904		4	90	488.234		4	90	629.862		4	90	680.873
4	91	398.154		4	91	492.395		4	91	601.308		4	91	679.242
4	92	381.411		4	92	505.222		4	92	617.735		4	92	677.967
4	93	395.592		4	93	496.857		4	93	587.063		4	93	641.594
4	94	383.103		4	94	502.804		4	94	636.632		4	94	672.262
4	95	386.88		4	95	495.008		4	95	603.703		4	95	670.667
4	96	401.224		4	96	510.06		4	96	614.898		4	96	662.081
4	97	386.919		4	97	515.813		4	97	602.209		4	97	657.265
4	98	407.608		4	98	526.243		4	98	607.769		4	98	660.542
4	99	374.469		4	99	499.419		4	99	620.702		4	99	666.819
4	100	394.155		4	100	516.135		4	100	595.655		4	100	679.982
4	101	383.188		4	101	512.328		4	101	596.965		4	101	664.621
4	102	398.667		4	102	509.034		4	102	598.745		4	102	677.175
4	103	380.342		4	103	497.804		4	103	607.562		4	103	650.052
4	104	376.465		4	104	512.243		4	104	626.427		4	104	671.491
4	105	386.04		4	105	478.053		4	105	611.099		4	105	676.448
4	106	404.366		4	106	509.503		4	106	609.857		4	106	671.062
4	107	380.231		4	107	515.106		4	107	610.144		4	107	640.085
4	108	381.146		4	108	502.706		4	108	604.919		4	108	637.125
4	109	385.029		4	109	506.371		4	109	610.749		4	109	660.096
4	110	391.115		4	110	505.449		4	110	604.715		4	110	650.118
4	111	395.101		4	111	520.172		4	111	582.25		4	111	663.809
4	112	398.007		4	112	495.299		4	112	580.033		4	112	666.532
4	113	385.518		4	113	484.947		4	113	597.187		4	113	670.268
4	114	392.46		4	114	523.186		4	114	616.908		4	114	661.577
4	115	367.253		4	115	497.246		4	115	608.338		4	115	667.49
4	116	386.61		4	116	496.265		4	116	612.578		4	116	660.887
4	117	395.897		4	117	497.954		4	117	602.664		4	117	667.649
4	118	383.707		4	118	515.2		4	118	607.124		4	118	675.43
4	119	379.26		4	119	509.389		4	119	615.046		4	119	680.359
4	120	377.013		4	120	487.74		4	120	579.746		4	120	687.647
4	121	373.606		4	121	492.545		4	121	598.722		4	121	660.595
4	122	402.181		4	122	486.102		4	122	599.831		4	122	659.096
4	123	396.379		4	123	495.529		4	123	594.829		4	123	679.097
4	124	397.487		4	124	489.709		4	124	634.067		4	124	713.99
4	125	397.911		4	125	514.033		4	125	604.47		4	125	659.117
4	126	384.323		4	126	511.388		4	126	606.143		4	126	641.501
4	127	390.455		4	127	506.645		4	127	591.474		4	127	640.864
4	128	375.382		4	128	499.335		4	128	609.736		4	128	666.06
4	129	380.977		4	129	514.385		4	129	644.568		4	129	660.861
4	130	390.144		4	130	505.461		4	130	615.289		4	130	682.481
4	131	379.251		4	131	519.973		4	131	597.13		4	131	673.563
4	132	392.956		4	132	500.546		4	132	628.445		4	132	661.676
4	133	381.972		4	133	521.778		4	133	611.884		4	133	642.399
4	134	388.152		4	134	509.039		4	134	593.632		4	134	664.147
4	135	385.043		4	135	494.444		4	135	631.95		4	135	689.552
4	136	397.292		4	136	516.695		4	136	580.928		4	136	667.236
4	137	393.284		4	137	523.168		4	137	621.535		4	137	673.868
4	138	405.579		4	138	512.186		4	138	613.792		4	138	659.599
4	139	402.67		4	139	492.605		4	139	614.058		4	139	651.578
4	140	378.547		4	140	535.946		4	140	594.193		4	140	657.446
4	141	401.65		4	141	519.557		4	141	609.802		4	141	667.346
4	142	403.966		4	142	506.908		4	142	628.321		4	142	689.11
4	143	395.401		4	143	491.677		4	143	590.374		4	143	660.82
4	144	402.673		4	144	496.355		4	144	613.051		4	144	665.359
4	145	386.9		4	145	489.923		4	145	606.03		4	145	691.164
4	146	394.472		4	146	512.485		4	146	610.031		4	146	661.749
4	147	406.206		4	147	509.807		4	147	621.696		4	147	664.631
4	148	388.952		4	148	510.353		4	148	599.069		4	148	656.248
4	149	363.426		4	149	504.657		4	149	590.388		4	149	666.077
4	150	397.434		4	150	523.873		4	150	582.25		4	150	687.997
4	151	380.886		4	151	517.125		4	151	589.898		4	151	670.386
4	152	404.362		4	152	516.894		4	152	606.438		4	152	670.583
4	153	372.754		4	153	519.007		4	153	593.815		4	153	645.295
4	154	385.356		4	154	488.189		4	154	611.327		4	154	636.3
4	155	376.924		4	155	513.115		4	155	602.065		4	155	665.115
4	156	397.653		4	156	488.289		4	156	589.543		4	156	696.184
4	157	398.075		4	157	495.162		4	157	630.243		4	157	633.791
4	158	382.845		4	158	492.653		4	158	620.757		4	158	641.657
4	159	383.152		4	159	517.464		4	159	629.459		4	159	658.343
4	160	377.062		4	160	506.91		4	160	576.327		4	160	676.76
4	161	388.883		4	161	498.396		4	161	607.571		4	161	657.924
4	162	385.867		4	162	476.695		4	162	607.259		4	162	660.471
4	163	387.212		4	163	515.483		4	163	613.145		4	163	652.636
4	164	387.14		4	164	481.975		4	164	593.984		4	164	675.011
4	165	369.449		4	165	490.965		4	165	587.947		4	165	663.88
4	166	368.994		4	166	497.715		4	166	610.01		4	166	675.611
4	167	417.991		4	167	500.507		4	167	611.882		4	167	656.759
4	168	407.875		4	168	514.075		4	168	602.388		4	168	667.78
4	169	393.286		4	169	481.931		4	169	590.936		4	169	660.249
4	170	410.795		4	170	494.277		4	170	626.735		4	170	647.589
4	171	386.068		4	171	506.089		4	171	612.597		4	171	675.468
4	172	390.31		4	172	504.374		4	172	610.292		4	172	652.368
4	173	399.2		4	173	506.105		4	173	617.153		4	173	661.794
4	174	401.752		4	174	501.662		4	174	594.206		4	174	686.444
4	175	387.001		4	175	476.17		4	175	616.816		4	175	677.739
4	176	382.982		4	176	497.107		4	176	614.649		4	176	679.923
4	177	392.505		4	177	506.4		4	177	618.048		4	177	673.127
4	178	370.248		4	178	510.788		4	178	597.648		4	178	663.448
4	179	404.026		4	179	490.554		4	179	595.34		4	179	663.133
4	180	397.36		4	180	483.091		4	180	614.439		4	180	657.973
4	181	369.207		4	181	507.285		4	181	617.943		4	181	638.318
4	182	404.278		4	182	506.147		4	182	595.539		4	182	712.101
4	183	388.404		4	183	500.045		4	183	605.796		4	183	641.786
4	184	393.657		4	184	505.022		4	184	596.394		4	184	665.634
4	185	390.443		4	185	501.022		4	185	580.491		4	185	677.501
4	186	399.403		4	186	512.926		4	186	571.507		4	186	645.263
4	187	393.409		4	187	502.77		4	187	631.577		4	187	657.701
4	188	395.992		4	188	483.425		4	188	628.028		4	188	689.921
4	189	385.101		4	189	536.086		4	189	613.019		4	189	672.161
4	190	372.954		4	190	501.228		4	190	620.75		4	190	649.342
4	191	383.93		4	191	510.15		4	191	615.644		4	191	665.077
4	192	391.797		4	192	495.131		4	192	619.261		4	192	665.248
4	193	379.748		4	193	514.676		4	193	610.111		4	193	662.894
4	194	389.71		4	194	488.274		4	194	608.557		4	194	658.742
4	195	368.798		4	195	507.822		4	195	610.452		4	195	651.917
4	196	380.742		4	196	490.11		4	196	587.397		4	196	650.266
4	197	402.98		4	197	510.277		4	197	595.96		4	197	679.889
4	198	379.783		4	198	510.655		4	198	614.915		4	198	668.315
4	199	389.214		4	199	517.884		4	199	582.299		4	199	673.681
4	200	408.034		4	200	493.866		4	200	612.069		4	200	664.296
4	201	367.312		4	201	506.124		4	201	611.316		4	201	683.702
4	202	398.152		4	202	492.987		4	202	598.205		4	202	681.946
4	203	372.407		4	203	508.25		4	203	629.468		4	203	660.722
4	204	379.816		4	204	496.738		4	204	624.348		4	204	673.07
4	205	387.851		4	205	499.101		4	205	629.149		4	205	676.121
4	206	390.215		4	206	499.669		4	206	624.873		4	206	635.05
4	207	396.725		4	207	481.271		4	207	575.376		4	207	648.399
4	208	391.089		4	208	492.05		4	208	611.222		4	208	638.259
4	209	394.725		4	209	499.099		4	209	606.151		4	209	686.897
4	210	399.229		4	210	507.532		4	210	601.493		4	210	641.693
4	211	387.815		4	211	522.05		4	211	625.626		4	211	670.796
4	212	384.609		4	212	491.36		4	212	608.821		4	212	662.743
4	213	397.572		4	213	508.052		4	213	627.102		4	213	649.739
4	214	384.345		4	214	521.306		4	214	616.191		4	214	682.92
4	215	403.526		4	215	507.567		4	215	608.381		4	215	668.372
4	216	383.488		4	216	491.873		4	216	618.609		4	216	668.541
4	217	382.358		4	217	495.215		4	217	611.274		4	217	663.127
4	218	381.44		4	218	506.902		4	218	605.233		4	218	653.335
4	219	397.958		4	219	505.087		4	219	629.082		4	219	682.036
4	220	402.234		4	220	473.389		4	220	632.192		4	220	668.407
4	221	400.834		4	221	532.146		4	221	612.29		4	221	659.685
4	222	388.766		4	222	495.121		4	222	613.17		4	222	634.331
4	223	367.35		4	223	481.171		4	223	604.354		4	223	668.864
4	224	390.933		4	224	493.052		4	224	590.874		4	224	687.955
4	225	394.753		4	225	522.008		4	225	592.03		4	225	705.168
4	226	383.047		4	226	517.93		4	226	587.809		4	226	687.075
4	227	377.359		4	227	502.637		4	227	577.198		4	227	663.001
4	228	411.17		4	228	507.504		4	228	606.95		4	228	664.4
4	229	378.894		4	229	493.707		4	229	623.148		4	229	670.891
4	230	393.252		4	230	483.976		4	230	619.189		4	230	687.862
4	231	395.628		4	231	511.801		4	231	594.438		4	231	661.756
4	232	404.276		4	232	526.82		4	232	600.374		4	232	665.578
4	233	396.141		4	233	514.999		4	233	602.882		4	233	640.294
4	234	388.959		4	234	497.656		4	234	626.619		4	234	672.878
4	235	397.646		4	235	481.097		4	235	608.163		4	235	677.628
4	236	400.926		4	236	515.491		4	236	598.62		4	236	633.777
4	237	391.522		4	237	519.014		4	237	634.918		4	237	672.246
4	238	396.64		4	238	487.307		4	238	602.637		4	238	651.111
4	239	396.036		4	239	492.827		4	239	590.302		4	239	662.276
4	240	392.275		4	240	508.007		4	240	607.791		4	240	661.757
4	241	396.954		4	241	507.953		4	241	610.943		4	241	688.243
4	242	378.822		4	242	532.73		4	242	608.255		4	242	670.905
4	243	399.735		4	243	518.644		4	243	604.409		4	243	648.675
4	244	374.041		4	244	506.614		4	244	610.514		4	244	681.611
4	245	386.224		4	245	497.242		4	245	605.185		4	245	674.546
4	246	396.819		4	246	500.581		4	246	606.519		4	246	651.625
4	247	392.431		4	247	504.124		4	247	621.06		4	247	671.711
4	248	392.32		4	248	498.727		4	248	586.885		4	248	659.274
4	249	387.225		4	249	512.596		4	249	578.327		4	249	659.45
4	250	402.019		4	250	506.701		4	250	587.677		4	250	673.64
4	251	402.257		4	251	498.983		4	251	620.203		4	251	632.253
4	252	391.172		4	252	508.335		4	252	614.451		4	252	683.508
4	253	378.491		4	253	477.667		4	253	599.472		4	253	668.661
4	254	366.998		4	254	508.532		4	254	649.265		4	254	700.501
4	255	402.15		4	255	498.596		4	255	585.597		4	255	685.272
4	256	398.306		4	256	499.528		4	256	632.032		4	256	659.373
4	257	392.403		4	257	520.344		4	257	594.487		4	257	664.013
4	258	383.46		4	258	482.735		4	258	589.081		4	258	678.066
4	259	399.334		4	259	490.39		4	259	594.21		4	259	654.115
4	260	393.307		4	260	509.11		4	260	617.985		4	260	693.958
4	261	400.062		4	261	489.044		4	261	622.27		4	261	657.441
4	262	383.722		4	262	515.354		4	262	599.364		4	262	663.541
4	263	408.541		4	263	538.876		4	263	581.788		4	263	666.854
4	264	381.825		4	264	510.397		4	264	621.329		4	264	685.597
4	265	388.567		4	265	476.367		4	265	596.671		4	265	673.206
4	266	396.075		4	266	508.443		4	266	588.532		4	266	679.164
4	267	408.63		4	267	499.747		4	267	618.013		4	267	682.566
4	268	410.073		4	268	513.962		4	268	623.947		4	268	674.517
4	269	391.876		4	269	508.965		4	269	571.708		4	269	648.92
4	270	383.154		4	270	499.118		4	270	640.786		4	270	653.489
4	271	382.016		4	271	507.479		4	271	646.732		4	271	646.558
4	272	390.388		4	272	522.22		4	272	592.084		4	272	662.17
4	273	396.58		4	273	493.656		4	273	575.648		4	273	693.511
4	274	397.39		4	274	503.594		4	274	590.776		4	274	652.665
4	275	408.705		4	275	496.594		4	275	586.052		4	275	696.969
4	276	379.796		4	276	517.81		4	276	601.189		4	276	660.395
4	277	397.629		4	277	507.543		4	277	612.825		4	277	668.384
4	278	397.491		4	278	506.848		4	278	631.686		4	278	677.58
4	279	394.672		4	279	506.296		4	279	615.532		4	279	643.109
4	280	378.639		4	280	493.577		4	280	622.873		4	280	666.955
4	281	415.67		4	281	506.158		4	281	607.667		4	281	653.843
4	282	386.595		4	282	531.301		4	282	598.742		4	282	652.423
4	283	397.06		4	283	489.524		4	283	607.142		4	283	652.282
4	284	389.818		4	284	500.971		4	284	583.989		4	284	677.697
4	285	393.578		4	285	490.694		4	285	624.664		4	285	657.465
4	286	400.91		4	286	491.114		4	286	604.555		4	286	710.583
4	287	391.408		4	287	497.055		4	287	591.707		4	287	652.824
4	288	400.332		4	288	530.808		4	288	614.37		4	288	668.772
4	289	395.851		4	289	519.206		4	289	601.595		4	289	664.717
4	290	376.555		4	290	532.149		4	290	596.704		4	290	665.875
4	291	391.204		4	291	502.645		4	291	600.493		4	291	655.713
4	292	396.734		4	292	526.483		4	292	618.497		4	292	665.818
4	293	380.104		4	293	530.597		4	293	594.853		4	293	680.697
4	294	402.453		4	294	493.734		4	294	622.953		4	294	675.911
4	295	399.146		4	295	494.141		4	295	618.504		4	295	673.879
4	296	396.921		4	296	506.889		4	296	603.936		4	296	676.168
4	297	383.732		4	297	517.352		4	297	624.262		4	297	672.397
4	298	413.118		4	298	503.719		4	298	604.022		4	298	674.564
4	299	375.018		4	299	487.429		4	299	621.835		4	299	694.361
5	0	388.904		5	0	493.967		5	0	577.768		5	0	676.031
5	1	386.694		5	1	491.863		5	1	588.02		5	1	675.796
5	2	400.755		5	2	497.808		5	2	603.932		5	2	693.599
5	3	405.226		5	3	496.356		5	3	603.835		5	3	647.227
5	4	394.949		5	4	513.849		5	4	619.112		5	4	669.754
5	5	408.179		5	5	486.931		5	5	629.318		5	5	671.655
5	6	403.541		5	6	537.435		5	6	607.391		5	6	660.633
5	7	408.756		5	7	517.58		5	7	607.465		5	7	662.345
5	8	399.29		5	8	475.725		5	8	597.258		5	8	682.078
5	9	392.618		5	9	514.194		5	9	609.094		5	9	664.909
5	10	394.129		5	10	524.109		5	10	606.251		5	10	670.219
5	11	391.598		5	11	498.27		5	11	600.178		5	11	672.142
5	12	403.466		5	12	501.226		5	12	595.559		5	12	660.789
5	13	376.053		5	13	498.795		5	13	637.724		5	13	682.682
5	14	403.452		5	14	509.521		5	14	606.673		5	14	671.206
5	15	378.83		5	15	501.943		5	15	574.974		5	15	651.893
5	16	400.068		5	16	505.828		5	16	588.897		5	16	638.176
5	17	401.582		5	17	500.397		5	17	617.158		5	17	678.636
5	18	394.408		5	18	508.225		5	18	603.983		5	18	670.465
5	19	390.572		5	19	509.667		5	19	609.764		5	19	664.172
5	20	401.248		5	20	477.689		5	20	610.593		5	20	676.844
5	21	389.687		5	21	486.376		5	21	589.175		5	21	679.544
5	22	375.451		5	22	478.182		5	22	605.928		5	22	660.297
5	23	391.938		5	23	514.911		5	23	603.892		5	23	674.918
5	24	375.36		5	24	513.865		5	24	622.155		5	24	637.817
5	25	395.835		5	25	506.439		5	25	615.38		5	25	671.31
5	26	378.595		5	26	472.761		5	26	611.85		5	26	641.104
5	27	407.6		5	27	494.608		5	27	594.695		5	27	661.3
5	28	382.269		5	28	508.898		5	28	596.989		5	28	665.093
5	29	399.487		5	29	508.189		5	29	592.148		5	29	672.763
5	30	378.552		5	30	506.878		5	30	620.673		5	30	678.045
5	31	395.837		5	31	502.098		5	31	575.988		5	31	649.533
5	32	392.664		5	32	511.177		5	32	594.33		5	32	665.499
5	33	391.225		5	33	520.4		5	33	617.615		5	33	660.524
5	34	384.661		5	34	505.883		5	34	605.78		5	34	659.904
5	35	377.885		5	35	507.209		5	35	602.91		5	35	663.104
5	36	383.76		5	36	508.65		5	36	597.185		5	36	665.55
5	37	409.512		5	37	486.867		5	37	594.945		5	37	687.153
5	38	395.651		5	38	500.519		5	38	627.181		5	38	688.074
5	39	398.872		5	39	516.132		5	39	644.349		5	39	659.859
5	40	392.698		5	40	497.454		5	40	613.292		5	40	670.941
5	41	394.362		5	41	494.752		5	41	603.576		5	41	677.466
5	42	396.391		5	42	500.836		5	42	604.717		5	42	665.517
5	43	392.926		5	43	485.365		5	43	604.083		5	43	673.424
5	44	405.644		5	44	503.443		5	44	586.351		5	44	686.679
5	45	397.542		5	45	485.677		5	45	596.277		5	45	672.327
5	46	400.647		5	46	508.636		5	46	594.189		5	46	692.45
5	47	404.137		5	47	511.263		5	47	593.134		5	47	655.17
5	48	382.421		5	48	506.441		5	48	635.447		5	48	650.625
5	49	391.738		5	49	507.769		5	49	596.634		5	49	657.718
5	50	391.202		5	50	534.19		5	50	597.628		5	50	683.216
5	51	393.123		5	51	525.01		5	51	591.254		5	51	660.373
5	52	408.049		5	52	473.188		5	52	605.845		5	52	682.462
5	53	401.718		5	53	510.256		5	53	592.331		5	53	651.514
5	54	380.006		5	54	489.143		5	54	604.863		5	54	661.298
5	55	353.643		5	55	491.568		5	55	606.833		5	55	704.74
5	56	407.713		5	56	511.8		5	56	596.306		5	56	661.654
5	57	404.187		5	57	499.175		5	57	600.965		5	57	702.127
5	58	392.386		5	58	500.492		5	58	618.856		5	58	667.13
5	59	394.668		5	59	516.055		5	59	604.243		5	59	667.529
5	60	387.184		5	60	528.054		5	60	581.786		5	60	672.597
5	61	381.353		5	61	517.77		5	61	599.056		5	61	676.751
5	62	390.444		5	62	492.765		5	62	604.046		5	62	657.622
5	63	379.566		5	63	503.347		5	63	614.777		5	63	666.813
5	64	392.445		5	64	500.667		5	64	612.325		5	64	668.522
5	65	383.056		5	65	496.022		5	65	590.787		5	65	640.964
5	66	397.083		5	66	515.182		5	66	588.266		5	66	683.953
5	67	384.808		5	67	515.849		5	67	617.284		5	67	660.82
5	68	395.314		5	68	495.625		5	68	608.352		5	68	664.781
5	69	393.439		5	69	485.059		5	69	597.795		5	69	677.961
5	70	385.2		5	70	497.804		5	70	602.68		5	70	656.678
5	71	395.328		5	71	487.672		5	71	595.1		5	71	673.87
5	72	403.282		5	72	486.494		5	72	599.361		5	72	665.474
5	73	403.582		5	73	521.192		5	73	582.764		5	73	700.429
5	74	416.818		5	74	492.524		5	74	616.235		5	74	667.959
5	75	372.412		5	75	526.07		5	75	594.065		5	75	673.69
5	76	389.774		5	76	533.487		5	76	599.208		5	76	655.648
5	77	406.6		5	77	529.175		5	77	593.349		5	77	663.414
5	78	383.274		5	78	487.003		5	78	581.757		5	78	663.241
5	79	393.07		5	79	526.796		5	79	603.88		5	79	662.258
5	80	378.452		5	80	497.493		5	80	620.266		5	80	657.084
5	81	368.961		5	81	478.462		5	81	599.111		5	81	666.964
5	82	395.725		5	82	527.185		5	82	606.175		5	82	644.842
5	83	415.17		5	83	505.362		5	83	601.243		5	83	665.446
5	84	389.788		5	84	479.36		5	84	591.951		5	84	666.767
5	85	398.508		5	85	528.753		5	85	574.406		5	85	641.88
5	86	393.441		5	86	501.994		5	86	606.679		5	86	668.846
5	87	379.154		5	87	504.044		5	87	628.658		5	87	665.002
5	88	390.128		5	88	504.458		5	88	603.266		5	88	636.619
5	89	412.359		5	89	516.479		5	89	585.527		5	89	668.602
5	90	395.298		5	90	510.016		5	90	595.126		5	90	658.643
5	91	388.092		5	91	509.81		5	91	618.129		5	91	667.956
5	92	398.808		5	92	495.785		5	92	614.952		5	92	676.571
5	93	400.959		5	93	510.019		5	93	575.059		5	93	666.429
5	94	400.24		5	94	517.583		5	94	585.011		5	94	676.187
5	95	376.43		5	95	508.16		5	95	607.303		5	95	664.289
5	96	395.801		5	96	505.58		5	96	620.619		5	96	669.154
5	97	394.256		5	97	526.109		5	97	626.952		5	97	686.325
5	98	397.721		5	98	511.469		5	98	619.831		5	98	676.681
5	99	380.621		5	99	492.723		5	99	607.472		5	99	666.088
5	100	395.014		5	100	522.623		5	100	576.476		5	100	688.81
5	101	402.324		5	101	489.232		5	101	619.33		5	101	695.73
5	102	376.239		5	102	498.353		5	102	589.509		5	102	669.514
5	103	387.022		5	103	508.315		5	103	594.214		5	103	673.351
5	104	392.572		5	104	506.057		5	104	579.273		5	104	664.322
5	105	385.511		5	105	475.546		5	105	584.781		5	105	653.668
5	106	402.446		5	106	490.549		5	106	600.781		5	106	682.951
5	107	391.985		5	107	524.849		5	107	568.315		5	107	675.12
5	108	391.762		5	108	502.306		5	108	574.611		5	108	651.145
5	109	395.767		5	109	503.615		5	109	609.862		5	109	675.81
5	110	379.612		5	110	525.279		5	110	603.803		5	110	700.229
5	111	388.146		5	111	504.159		5	111	594.531		5	111	698.937
5	112	401.533		5	112	493.544		5	112	591.698		5	112	687.217
5	113	379.565		5	113	503.296		5	113	610.944		5	113	689.144
5	114	388.531		5	114	486.261		5	114	564.872		5	114	633.283
5	115	409.409		5	115	496.953		5	115	585.979		5	115	659.756
5	116	385.637		5	116	493.281		5	116	599.194		5	116	658.779
5	117	397.412		5	117	494.153		5	117	594.453		5	117	672.794
5	118	391.116		5	118	506.131		5	118	604.309		5	118	652.148
5	119	383.68		5	119	507.934		5	119	609.382		5	119	653.389
5	120	387.312		5	120	480.432		5	120	614.292		5	120	660.893
5	121	403.583		5	121	491.385		5	121	606.207		5	121	682.468
5	122	399.753		5	122	508.095		5	122	607.565		5	122	662.276
5	123	386.866		5	123	509.608		5	123	581.252		5	123	653.7
5	124	394.097		5	124	503.405		5	124	605.531		5	124	647.438
5	125	418.416		5	125	517.396		5	125	596.208		5	125	676.489
5	126	355.034		5	126	519.113		5	126	619.515		5	126	672.513
5	127	380.262		5	127	487.465		5	127	627.641		5	127	679.472
5	128	397.081		5	128	527.815		5	128	590.389		5	128	671.987
5	129	375.822		5	129	476.356		5	129	600.925		5	129	648.856
5	130	403.579		5	130	492.938		5	130	594.339		5	130	661.963
5	131	391.049		5	131	508.657		5	131	620.186		5	131	676.13
5	132	402.512		5	132	482.019		5	132	620.735		5	132	649.705
5	133	403.477		5	133	496.692		5	133	589.601		5	133	651.884
5	134	356.859		5	134	504.927		5	134	618.403		5	134	645.975
5	135	398.766		5	135	482.321		5	135	624.423		5	135	667.751
5	136	405.225		5	136	492.421		5	136	590.343		5	136	653.56
5	137	407.291		5	137	494.44		5	137	637.795		5	137	673.166
5	138	412.575		5	138	503.428		5	138	612.63		5	138	666.714
5	139	379.912		5	139	486.268		5	139	593.993		5	139	651.096
5	140	404.947		5	140	515.133		5	140	613.32		5	140	679.057
5	141	403.546		5	141	499.764		5	141	610.621		5	141	678.315
5	142	391.522		5	142	491.611		5	142	602.152		5	142	697.825
5	143	388.915		5	143	521.543		5	143	596.99		5	143	714.967
5	144	388.292		5	144	521.424		5	144	612.023		5	144	654.619
5	145	391.433		5	145	495.956		5	145	572.017		5	145	663.9
5	146	392.013		5	146	505.369		5	146	613.288		5	146	657.389
5	147	381.759		5	147	524.664		5	147	616.386		5	147	658.698
5	148	401.581		5	148	500.177		5	148	603.09		5	148	683.511
5	149	385.799		5	149	497.159		5	149	607.626		5	149	661.661
5	150	369.943		5	150	528.176		5	150	590.371		5	150	667.482
5	151	390.263		5	151	514.157		5	151	617.229		5	151	676.476
5	152	403.591		5	152	513.766		5	152	598.745		5	152	699.535
5	153	387.124		5	153	518.383		5	153	590.673		5	153	647.913
5	154	378.766		5	154	512.515		5	154	586.981		5	154	663.899
5	155	379.497		5	155	510.731		5	155	615.213		5	155	668.965
5	156	390.072		5	156	490.3		5	156	607.38		5	156	675.977
5	157	382.393		5	157	508.731		5	157	572.666		5	157	665.639
5	158	377.107		5	158	502.025		5	158	619.71		5	158	681.731
5	159	377.784		5	159	485.516		5	159	598.522		5	159	652.01
5	160	394.971		5	160	502.576		5	160	620.85		5	160	660.407
5	161	390.025		5	161	496.151		5	161	598.856		5	161	669.111
5	162	384.574		5	162	542.486		5	162	614.476		5	162	657.8
5	163	387.82		5	163	521.056		5	163	611.941		5	163	668.555
5	164	382.762		5	164	474.882		5	164	616.937		5	164	676.373
5	165	403.024		5	165	502.845		5	165	614.845		5	165	662.643
5	166	398.79		5	166	512.209		5	166	608.855		5	166	692.053
5	167	401.361		5	167	522.924		5	167	601.043		5	167	656.078
5	168	401.783		5	168	526.684		5	168	610.411		5	168	684.547
5	169	404.57		5	169	522.115		5	169	591.782		5	169	665.929
5	170	379.694		5	170	486.057		5	170	607.788		5	170	714.824
5	171	373.308		5	171	501.512		5	171	604.141		5	171	658.609
5	172	408.921		5	172	504.359		5	172	606.801		5	172	669.466
5	173	406.677		5	173	490.829		5	173	590.836		5	173	648.273
5	174	394.319		5	174	507.285		5	174	586.287		5	174	677.808
5	175	406.188		5	175	515.967		5	175	586.618		5	175	667.348
5	176	388.17		5	176	520.367		5	176	628.609		5	176	664.558
5	177	387.46		5	177	515.343		5	177	599.443		5	177	674.317
5	178	404.981		5	178	506.58		5	178	602.137		5	178	659.311
5	179	395.874		5	179	499.907		5	179	594.618		5	179	680.844
5	180	382.385		5	180	525.687		5	180	593.517		5	180	667.674
5	181	386.047		5	181	501.983		5	181	606.636		5	181	657.876
5	182	398.767		5	182	493.748		5	182	611.579		5	182	691.751
5	183	382.82		5	183	517.574		5	183	592.134		5	183	680.506
5	184	394.231		5	184	503.034		5	184	610.697		5	184	658.992
5	185	380.143		5	185	490.218		5	185	633.693		5	185	691.406
5	186	394.184		5	186	507.406		5	186	569.977		5	186	661.451
5	187	390.862		5	187	506.618		5	187	599.367		5	187	646.809
5	188	369.913		5	188	524.669		5	188	617.992		5	188	669.804
5	189	410.955		5	189	511.121		5	189	600.303		5	189	683.59
5	190	395.256		5	190	499.425		5	190	595.088		5	190	659.214
5	191	395.509		5	191	499.4		5	191	604.679		5	191	668.198
5	192	407.367		5	192	516.382		5	192	594.708		5	192	674.254
5	193	376.973		5	193	517.986		5	193	609.744		5	193	678.768
5	194	364.492		5	194	515.631		5	194	628.48		5	194	670.46
5	195	387.509		5	195	492.964		5	195	603.117		5	195	667.262
5	196	374.153		5	196	504.997		5	196	591.705		5	196	624.972
5	197	378.631		5	197	495.786		5	197	576.63		5	197	675.614
5	198	395.043		5	198	507.448		5	198	608.573		5	198	645.808
5	199	413.585		5	199	509.806		5	199	616.944		5	199	677.312
5	200	390.505		5	200	498.079		5	200	624.129		5	200	661.134
5	201	395.724		5	201	517.721		5	201	590.872		5	201	666.362
5	202	380.635		5	202	523.436		5	202	605.362		5	202	686
5	203	411.585		5	203	484.769		5	203	597.148		5	203	631.75
5	204	391.627		5	204	491.557		5	204	633.949		5	204	660.263
5	205	393.259		5	205	496.25		5	205	611.271		5	205	670.941
5	206	414.103		5	206	495.288		5	206	603.977		5	206	675.81
5	207	374.285		5	207	487.508		5	207	635.166		5	207	658.518
5	208	375.576		5	208	511.715		5	208	587.483		5	208	685.634
5	209	382.551		5	209	515.115		5	209	611.832		5	209	661.592
5	210	377.253		5	210	510.691		5	210	606.857		5	210	684.275
5	211	396.234		5	211	518.424		5	211	599.734		5	211	678.37
5	212	376.766		5	212	498.855		5	212	602.719		5	212	692.156
5	213	399.337		5	213	515.638		5	213	594.201		5	213	686.934
5	214	393.935		5	214	505.168		5	214	603.687		5	214	690.219
5	215	405.056		5	215	484.29		5	215	595.304		5	215	657.637
5	216	397.816		5	216	499.73		5	216	610.17		5	216	674.838
5	217	376.982		5	217	519.796		5	217	603.028		5	217	698.124
5	218	384.492		5	218	500.245		5	218	617.335		5	218	652.836
5	219	413.002		5	219	523.522		5	219	577.418		5	219	693.252
5	220	384.075		5	220	480.811		5	220	623.948		5	220	651.504
5	221	387.528		5	221	513.318		5	221	602.923		5	221	674.1
5	222	404.928		5	222	505.693		5	222	620.966		5	222	674.693
5	223	401.213		5	223	469.65		5	223	594.882		5	223	668.421
5	224	379.309		5	224	521.479		5	224	593.735		5	224	677.339
5	225	390.537		5	225	506.449		5	225	621.586		5	225	689.039
5	226	396.731		5	226	488.394		5	226	593.549		5	226	673.284
5	227	405.411		5	227	497.031		5	227	581.108		5	227	683.514
5	228	391.708		5	228	502.84		5	228	604.489		5	228	663.084
5	229	385.368		5	229	497.648		5	229	598.939		5	229	682.623
5	230	408.577		5	230	490.463		5	230	590.212		5	230	646.109
5	231	380.701		5	231	494.01		5	231	588.804		5	231	681.847
5	232	408.039		5	232	518.23		5	232	610.085		5	232	676.705
5	233	386.911		5	233	509.552		5	233	589.988		5	233	656.821
5	234	382.83		5	234	489.041		5	234	597.018		5	234	658.734
5	235	404.782		5	235	491.879		5	235	617.974		5	235	668.028
5	236	406.369		5	236	496.212		5	236	603.293		5	236	668.528
5	237	389.122		5	237	494.944		5	237	592.228		5	237	668.921
5	238	395.101		5	238	526.343		5	238	628.355		5	238	685.38
5	239	387.001		5	239	523.735		5	239	597.625		5	239	656.642
5	240	396.81		5	240	508.147		5	240	587.056		5	240	679.146
5	241	388.623		5	241	490.819		5	241	611.289		5	241	663.593
5	242	401.781		5	242	517.286		5	242	597.8		5	242	667.621
5	243	395.592		5	243	505.62		5	243	619.141		5	243	661.036
5	244	390.822		5	244	509.304		5	244	634.403		5	244	675.457
5	245	397.794		5	245	507.57		5	245	568.581		5	245	671.477
5	246	389.71		5	246	485.722		5	246	585.387		5	246	680.573
5	247	406.926		5	247	489.612		5	247	621.608		5	247	682.946
5	248	385.08		5	248	488.658		5	248	596.564		5	248	655.657
5	249	408.142		5	249	514.368		5	249	595.996		5	249	660.844
5	250	390.412		5	250	524.108		5	250	587.027		5	250	661.016
5	251	406.296		5	251	528.369		5	251	616.814		5	251	686.154
5	252	379.446		5	252	500.681		5	252	604.657		5	252	668.953
5	253	394.105		5	253	482.321		5	253	603.58		5	253	651.902
5	254	400.207		5	254	491.603		5	254	611.294		5	254	671.016
5	255	409.29		5	255	499.597		5	255	606.267		5	255	675.067
5	256	390.122		5	256	500.024		5	256	608.637		5	256	671.607
5	257	395.86		5	257	492.068		5	257	581.728		5	257	664.744
5	258	414.357		5	258	489.774		5	258	610.523		5	258	679.999
5	259	402.884		5	259	509.829		5	259	596.659		5	259	670.773
5	260	398.837		5	260	471.021		5	260	609.853		5	260	668.416
5	261	401.841		5	261	482.511		5	261	594.814		5	261	656.471
5	262	397.076		5	262	511.529		5	262	585.562		5	262	688.908
5	263	394.274		5	263	501.826		5	263	617.626		5	263	687.396
5	264	388.865		5	264	509.872		5	264	596.224		5	264	651.219
5	265	410.276		5	265	539.125		5	265	609.691		5	265	647.23
5	266	371.291		5	266	510.254		5	266	614.738		5	266	690.935
5	267	395.078		5	267	500.643		5	267	616.024		5	267	669.139
5	268	387.097		5	268	485.649		5	268	610.434		5	268	667.963
5	269	400.187		5	269	507.94		5	269	608.918		5	269	671.038
5	270	394.832		5	270	526.135		5	270	596.901		5	270	684.352
5	271	386.266		5	271	514.134		5	271	591.063		5	271	681.104
5	272	385.07		5	272	518.645		5	272	609.121		5	272	682.073
5	273	387.767		5	273	525.75		5	273	593.796		5	273	664.469
5	274	403.574		5	274	499.655		5	274	634.616		5	274	660.262
5	275	395.926		5	275	492.832		5	275	580.856		5	275	677.267
5	276	398.262		5	276	492.654		5	276	604.274		5	276	656.307
5	277	393.331		5	277	517.921		5	277	626.197		5	277	666.201
5	278	384.871		5	278	500.124		5	278	591.033		5	278	694.836
5	279	376.096		5	279	507.218		5	279	613.955		5	279	649.097
5	280	391.685		5	280	516.103		5	280	600.183		5	280	693.713
5	281	397.963		5	281	496.827		5	281	602.025		5	281	667.304
5	282	391.105		5	282	507.65		5	282	599.861		5	282	681.596
5	283	395.884		5	283	507.014		5	283	579.266		5	283	666.423
5	284	385.923		5	284	495.679		5	284	606.104		5	284	654.195
5	285	418.984		5	285	507.779		5	285	584.497		5	285	664.327
5	286	392.791		5	286	501.352		5	286	630.956		5	286	680.744
5	287	404.485		5	287	501.061		5	287	577.638		5	287	676.382
5	288	378.621		5	288	484.307		5	288	596.692		5	288	687.719
5	289	383.816		5	289	527.378		5	289	598.424		5	289	678.748
5	290	378.862		5	290	509.188		5	290	595.115		5	290	676.163
5	291	390.347		5	291	522.617		5	291	610.433		5	291	696.069
5	292	380.499		5	292	520.271		5	292	577.581		5	292	673.452
5	293	374.467		5	293	514.397		5	293	582.263		5	293	633.741
5	294	390.743		5	294	508.835		5	294	590.227		5	294	669.571
5	295	396.946		5	295	495.815		5	295	614.723		5	295	652.655
5	296	388.675		5	296	505.418		5	296	617.361		5	296	665.43
5	297	383.645		5	297	500.18		5	297	607.427		5	297	661.948
5	298	413.459		5	298	500.852		5	298	587.564		5	298	646.753
5	299	379.913		5	299	509.837		5	299	575.44		5	299	669.143
6	0	407.621		6	0	504.883		6	0	605.514		6	0	659.468
6	1	392.807		6	1	504.303		6	1	611.653		6	1	676.854
6	2	389.584		6	2	506.702		6	2	622.092		6	2	664.256
6	3	398.835		6	3	495.11		6	3	587.695		6	3	666.656
6	4	389.347		6	4	501.82		6	4	607.917		6	4	662.428
6	5	396.091		6	5	498.031		6	5	609.193		6	5	674.632
6	6	409.755		6	6	501.766		6	6	637.425		6	6	710.484
6	7	401.426		6	7	503.805		6	7	597.975		6	7	676.026
6	8	390.88		6	8	510.945		6	8	621.116		6	8	667.548
6	9	391.056		6	9	488.338		6	9	596.793		6	9	657.379
6	10	408.42		6	10	504.151		6	10	602.445		6	10	675.462
6	11	389.054		6	11	478.433		6	11	613.446		6	11	680.784
6	12	365.54		6	12	516.938		6	12	623.404		6	12	707.156
6	13	397.7		6	13	498.52		6	13	579.035		6	13	656.994
6	14	397.708		6	14	540.169		6	14	614.764		6	14	692.795
6	15	405.561		6	15	501.516		6	15	591.626		6	15	652.567
6	16	377.2		6	16	505.841		6	16	639.138		6	16	661.129
6	17	410.376		6	17	492.1		6	17	600.651		6	17	663.083
6	18	409.452		6	18	491.562		6	18	613.411		6	18	635.298
6	19	387.995		6	19	506.785		6	19	613.425		6	19	662.986
6	20	390.191		6	20	520.968		6	20	599.292		6	20	681.543
6	21	391.531		6	21	493.583		6	21	609.044		6	21	664.446
6	22	391.356		6	22	517.479		6	22	611.036		6	22	662.424
6	23	385.553		6	23	494.788		6	23	625.813		6	23	680.494
6	24	390.433		6	24	508.848		6	24	594.971		6	24	675.876
6	25	389.502		6	25	487.349		6	25	616.8		6	25	651.827
6	26	393.347		6	26	523.953		6	26	622.944		6	26	664.551
6	27	388.546		6	27	521.349		6	27	611.372		6	27	664.783
6	28	380.947		6	28	525.766		6	28	621.937		6	28	689.703
6	29	375.332		6	29	516.105		6	29	611.86		6	29	679.145
6	30	392.788		6	30	502.662		6	30	618.021		6	30	699.433
6	31	385.16		6	31	494.908		6	31	596.874		6	31	641.971
6	32	389.489		6	32	527.84		6	32	626.024		6	32	662.897
6	33	417.493		6	33	521.47		6	33	589.604		6	33	671.047
6	34	409.136		6	34	492.547		6	34	598.02		6	34	685.533
6	35	391.241		6	35	512.151		6	35	598.188		6	35	644.146
6	36	405.867		6	36	512.506		6	36	613.175		6	36	668.045
6	37	394.222		6	37	511.553		6	37	636.075		6	37	634.642
6	38	371.345		6	38	516.696		6	38	624.496		6	38	671.583
6	39	377.697		6	39	504.151		6	39	584.736		6	39	700.62
6	40	393.255		6	40	519.395		6	40	590.211		6	40	660.731
6	41	412.491		6	41	533.442		6	41	600.501		6	41	677.264
6	42	384.068		6	42	501.562		6	42	608.797		6	42	686.256
6	43	383.206		6	43	516.946		6	43	628.532		6	43	659.207
6	44	384.321		6	44	500.985		6	44	626.786		6	44	680.137
6	45	392.495		6	45	520.333		6	45	592.54		6	45	649.653
6	46	401.595		6	46	520.313		6	46	591.127		6	46	643.609
6	47	401.618		6	47	505.325		6	47	616.811		6	47	662.471
6	48	416.749		6	48	514.86		6	48	607.198		6	48	664.822
6	49	394.537		6	49	520.026		6	49	607.607		6	49	631.63
6	50	383.389		6	50	522.986		6	50	599.445		6	50	672.792
6	51	395.063		6	51	500.915		6	51	604.938		6	51	661.604
6	52	365.658		6	52	473.371		6	52	626.604		6	52	661.673
6	53	379.207		6	53	511.984		6	53	594.674		6	53	673.457
6	54	385.403		6	54	507.572		6	54	582.126		6	54	669.677
6	55	389.36		6	55	492.453		6	55	623.831		6	55	671.697
6	56	396.901		6	56	507.063		6	56	635.878		6	56	660.532
6	57	385.037		6	57	517.167		6	57	597.7		6	57	665.081
6	58	376.162		6	58	501.764		6	58	600.683		6	58	672.637
6	59	377.785		6	59	514.57		6	59	621.014		6	59	655.906
6	60	396.031		6	60	520.796		6	60	605.379		6	60	662.154
6	61	388.637		6	61	535.823		6	61	615.99		6	61	660.915
6	62	391.2		6	62	502.836		6	62	595.526		6	62	664.384
6	63	390.121		6	63	516.954		6	63	602.104		6	63	652.012
6	64	387.005		6	64	517.718		6	64	604.163		6	64	651.668
6	65	404.653		6	65	507.585		6	65	599.089		6	65	673.455
6	66	392.819		6	66	521.136		6	66	599.312		6	66	671.899
6	67	378.863		6	67	508.871		6	67	622.533		6	67	670.003
6	68	392.443		6	68	521.714		6	68	623.347		6	68	678.9
6	69	407.964		6	69	498.59		6	69	600.585		6	69	688.088
6	70	396.067		6	70	511.509		6	70	626.59		6	70	670.5
6	71	398.353		6	71	495.612		6	71	641.579		6	71	677.139
6	72	387.477		6	72	509.254		6	72	612.231		6	72	677.343
6	73	384.153		6	73	490.697		6	73	588.881		6	73	697.852
6	74	399.524		6	74	512.072		6	74	616.094		6	74	661.819
6	75	405.866		6	75	511.392		6	75	641.885		6	75	687.255
6	76	405.293		6	76	493.075		6	76	612.91		6	76	691.244
6	77	394.427		6	77	510.694		6	77	592.301		6	77	645.42
6	78	390.746		6	78	509.235		6	78	605.931		6	78	665.534
6	79	417.201		6	79	515.014		6	79	605.886		6	79	664.058
6	80	421.103		6	80	497.753		6	80	609.287		6	80	643.739
6	81	389.071		6	81	488.052		6	81	627.864		6	81	649.514
6	82	396.497		6	82	504.351		6	82	621.561		6	82	661.499
6	83	376.538		6	83	526.359		6	83	618.258		6	83	665.025
6	84	385.74		6	84	484.139		6	84	597.406		6	84	640.292
6	85	400.584		6	85	476.886		6	85	600.444		6	85	677.09
6	86	390.213		6	86	501.629		6	86	612.404		6	86	673.934
6	87	409.373		6	87	497.242		6	87	615.034		6	87	655.655
6	88	376.545		6	88	519.268		6	88	624.216		6	88	671.72
6	89	406.725		6	89	518.434		6	89	606.412		6	89	691.341
6	90	377.704		6	90	515.215		6	90	615.096		6	90	664.965
6	91	379.483		6	91	507.826		6	91	600.532		6	91	684.784
6	92	384.491		6	92	522.194		6	92	614.484		6	92	691.455
6	93	393.639		6	93	510.061		6	93	609.733		6	93	674.706
6	94	388.851		6	94	516.173		6	94	593.811		6	94	702.256
6	95	401.829		6	95	507.898		6	95	603.67		6	95	658.477
6	96	390.142		6	96	521.535		6	96	610.796		6	96	672.457
6	97	392.98		6	97	509.803		6	97	609.928		6	97	682.268
6	98	385.112		6	98	515.155		6	98	614.684		6	98	670.757
6	99	406.762		6	99	509.771		6	99	610.606		6	99	680.722
6	100	382.33		6	100	505.322		6	100	620.687		6	100	713.304
6	101	390.277		6	101	502.735		6	101	614.728		6	101	663.647
6	102	397.178		6	102	503.836		6	102	588.61		6	102	697.104
6	103	395.65		6	103	501.838		6	103	598.582		6	103	676.907
6	104	392.082		6	104	491.251		6	104	613.47		6	104	676.869
6	105	401.83		6	105	510.935		6	105	605.356		6	105	681.218
6	106	392.374		6	106	495.067		6	106	623.598		6	106	677.332
6	107	392.52		6	107	489.484		6	107	590.256		6	107	677.778
6	108	383.074		6	108	505.794		6	108	615.931		6	108	699.598
6	109	369.5		6	109	527.2		6	109	598.003		6	109	700.585
6	110	393.055		6	110	519.86		6	110	627.36		6	110	660.713
6	111	375.765		6	111	514.573		6	111	582.978		6	111	672.953
6	112	384.215		6	112	493.566		6	112	586.622		6	112	694.942
6	113	396.613		6	113	501.683		6	113	638.531		6	113	675.594
6	114	399.553		6	114	492.361		6	114	585.267		6	114	678.691
6	115	389.387		6	115	512.229		6	115	605.414		6	115	699.864
6	116	396.19		6	116	526.819		6	116	608.629		6	116	698.117
6	117	391.794		6	117	495.607		6	117	615.051		6	117	654.377
6	118	401.022		6	118	525.017		6	118	601.994		6	118	676.241
6	119	390.171		6	119	504.606		6	119	620.185		6	119	684.985
6	120	392.468		6	120	523.958		6	120	627.497		6	120	674.778
6	121	386.406		6	121	511.816		6	121	632.754		6	121	708.591
6	122	390.859		6	122	514.351		6	122	616.6		6	122	666.434
6	123	389.529		6	123	513.405		6	123	597.049		6	123	671.905
6	124	393.958		6	124	512.636		6	124	607.461		6	124	648.412
6	125	395.472		6	125	502.959		6	125	619.828		6	125	665.471
6	126	402.702		6	126	527.715		6	126	607.96		6	126	656.572
6	127	392.248		6	127	508.471		6	127	609.906		6	127	684.341
6	128	409.11		6	128	499.818		6	128	614.18		6	128	697.395
6	129	393.593		6	129	526.865		6	129	587.35		6	129	675.869
6	130	382.301		6	130	518.03		6	130	604.748		6	130	688.542
6	131	382.327		6	131	492.343		6	131	579.982		6	131	683.385
6	132	419.317		6	132	513.063		6	132	597.433		6	132	652.281
6	133	400.415		6	133	520.932		6	133	614.637		6	133	644.671
6	134	387.935		6	134	511.843		6	134	626.906		6	134	677.869
6	135	375.168		6	135	516.76		6	135	613.824		6	135	663.783
6	136	399.084		6	136	484.405		6	136	606.508		6	136	684.099
6	137	395.302		6	137	527.759		6	137	604.436		6	137	667.054
6	138	383.184		6	138	499.248		6	138	607.745		6	138	657.101
6	139	382.796		6	139	516.014		6	139	588.358		6	139	668.049
6	140	414.679		6	140	520.24		6	140	601.154		6	140	671.883
6	141	378.662		6	141	512.793		6	141	642.554		6	141	692.69
6	142	405.387		6	142	507.829		6	142	624.146		6	142	677.573
6	143	376.334		6	143	507.536		6	143	623.862		6	143	648.965
6	144	423.519		6	144	497.115		6	144	612.288		6	144	684.961
6	145	392.044		6	145	522.363		6	145	627.414		6	145	664.256
6	146	395.588		6	146	492.847		6	146	606.372		6	146	672.701
6	147	389.101		6	147	515.834		6	147	610.409		6	147	700.134
6	148	383.013		6	148	521.668		6	148	589.447		6	148	682.845
6	149	399.064		6	149	506.21		6	149	591.063		6	149	690.676
6	150	396.69		6	150	505.309		6	150	604.648		6	150	686.848
6	151	372.005		6	151	520.789		6	151	597.793		6	151	660.358
6	152	404.378		6	152	510.089		6	152	596.304		6	152	672.522
6	153	391.2		6	153	517.137		6	153	637.04		6	153	664.438
6	154	399.715		6	154	496.26		6	154	613.756		6	154	664.561
6	155	388.432		6	155	511.89		6	155	626.089		6	155	670.568
6	156	403.925		6	156	503.757		6	156	582.01		6	156	668.926
6	157	356.286		6	157	507.518		6	157	611.827		6	157	686.885
6	158	400.825		6	158	484.396		6	158	619.964		6	158	656.922
6	159	399.375		6	159	520.388		6	159	608.822		6	159	691.188
6	160	387.993		6	160	506.15		6	160	626.955		6	160	663.229
6	161	405.18		6	161	499.696		6	161	623.357		6	161	650.45
6	162	367.639		6	162	479.093		6	162	586.401		6	162	651.361
6	163	393.899		6	163	482.259		6	163	608.01		6	163	659.995
6	164	382.016		6	164	510.663		6	164	626.664		6	164	644.922
6	165	411.689		6	165	489.168		6	165	586.476		6	165	687.235
6	166	377.479		6	166	506.836		6	166	607.433		6	166	669.485
6	167	421.867		6	167	489.509		6	167	636.643		6	167	694.489
6	168	392.077		6	168	512.194		6	168	614.679		6	168	665.514
6	169	387.04		6	169	491.041		6	169	618.575		6	169	671.019
6	170	391.47		6	170	523.8		6	170	603.248		6	170	686.708
6	171	378.496		6	171	497.77		6	171	582.653		6	171	668.039
6	172	403.348		6	172	498.262		6	172	595.364		6	172	662.031
6	173	411.605		6	173	498.099		6	173	608.235		6	173	683.86
6	174	402.263		6	174	514.072		6	174	593.321		6	174	666.264
6	175	394.796		6	175	497.387		6	175	614.672		6	175	666.697
6	176	383.168		6	176	538.694		6	176	581.956		6	176	653.446
6	177	382.599		6	177	512.254		6	177	617.33		6	177	671.401
6	178	391.188		6	178	497.593		6	178	580.206		6	178	669.478
6	179	372.022		6	179	511.266		6	179	622.251		6	179	664.917
6	180	384.821		6	180	534.385		6	180	615.352		6	180	654.923
6	181	393.743		6	181	526.87		6	181	597.944		6	181	653.57
6	182	378.394		6	182	512.904		6	182	624.102		6	182	697.39
6	183	381.586		6	183	510.97		6	183	606.747		6	183	655.344
6	184	376.541		6	184	533.467		6	184	614.365		6	184	660.96
6	185	386.727		6	185	514.262		6	185	611.249		6	185	670.879
6	186	384.07		6	186	501.7		6	186	590.014		6	186	693.066
6	187	379.072		6	187	493.718		6	187	583.86		6	187	678.215
6	188	386.635		6	188	516.554		6	188	621.427		6	188	701.788
6	189	407.09		6	189	489.777		6	189	608.161		6	189	658.662
6	190	415.335		6	190	508.072		6	190	584.504		6	190	681.745
6	191	376.592		6	191	505.452		6	191	625.068		6	191	659.836
6	192	406.562		6	192	500.469		6	192	622.836		6	192	670.198
6	193	404.784		6	193	497.751		6	193	605.8		6	193	654.111
6	194	404.863		6	194	503.378		6	194	584.542		6	194	676.035
6	195	392.613		6	195	506.845		6	195	589.689		6	195	657.459
6	196	391.87		6	196	499.117		6	196	613.5		6	196	644.489
6	197	374.425		6	197	499.938		6	197	600.146		6	197	691.387
6	198	377.64		6	198	534.06		6	198	614.353		6	198	690.837
6	199	387.075		6	199	515.289		6	199	601.141		6	199	660.704
6	200	375.084		6	200	517.787		6	200	630.724		6	200	677.927
6	201	386.292		6	201	501.052		6	201	625.396		6	201	666.576
6	202	400.255		6	202	476.576		6	202	594.439		6	202	668.383
6	203	378.622		6	203	511.918		6	203	608.928		6	203	671.447
6	204	392.643		6	204	484.443		6	204	608.739		6	204	677.778
6	205	419.517		6	205	500.847		6	205	621.108		6	205	679.665
6	206	419.133		6	206	491.432		6	206	612.792		6	206	688.633
6	207	388.079		6	207	477.286		6	207	604.28		6	207	680.151
6	208	409.319		6	208	498.599		6	208	598.201		6	208	699.865
6	209	396.229		6	209	515.415		6	209	614.663		6	209	669.41
6	210	401.966		6	210	530.753		6	210	618.934		6	210	691.262
6	211	380.112		6	211	512.64		6	211	586.887		6	211	677.139
6	212	396.066		6	212	500.845		6	212	592.462		6	212	652.31
6	213	388.524		6	213	508.983		6	213	608.771		6	213	687.71
6	214	397.479		6	214	480.98		6	214	615.943		6	214	665.228
6	215	389.771		6	215	509.094		6	215	619.541		6	215	689.693
6	216	388.845		6	216	497.791		6	216	631.272		6	216	694.305
6	217	400.946		6	217	500.002		6	217	615.987		6	217	705.158
6	218	382.187		6	218	530.367		6	218	625.363		6	218	663.532
6	219	397.984		6	219	515.567		6	219	619.896		6	219	637.324
6	220	420.148		6	220	501.289		6	220	642.262		6	220	674.502
6	221	376.481		6	221	486.576		6	221	597.399		6	221	691.877
6	222	381.989		6	222	486.347		6	222	612.096		6	222	679.186
6	223	394.155		6	223	521.712		6	223	577.737		6	223	675.827
6	224	381.833		6	224	487.89		6	224	604.827		6	224	670.655
6	225	409.838		6	225	500.07		6	225	597.825		6	225	696.718
6	226	411.925		6	226	505.57		6	226	589.561		6	226	678.622
6	227	419.513		6	227	513.307		6	227	601.553		6	227	672.561
6	228	388.794		6	228	511.496		6	228	597.017		6	228	664.545
6	229	409.501		6	229	528.63		6	229	594.039		6	229	655.467
6	230	405.112		6	230	530.497		6	230	596.946		6	230	660.308
6	231	415.453		6	231	482.939		6	231	593.544		6	231	693.512
6	232	392.496		6	232	519.248		6	232	607.947		6	232	649.494
6	233	382.844		6	233	518.024		6	233	614.355		6	233	674.987
6	234	402.833		6	234	492.392		6	234	624.157		6	234	680.913
6	235	403.208		6	235	510.019		6	235	606.729		6	235	675.263
6	236	404.519		6	236	496.828		6	236	592.926		6	236	696.728
6	237	398.649		6	237	518.012		6	237	609.584		6	237	663.452
6	238	370.592		6	238	516.529		6	238	593.908		6	238	646.932
6	239	420.499		6	239	528.327		6	239	607.733		6	239	670.177
6	240	376.481		6	240	519.776		6	240	599.059		6	240	660.962
6	241	389.301		6	241	497.772		6	241	637.191		6	241	651.324
6	242	396.764		6	242	513.425		6	242	619.683		6	242	677.324
6	243	394.137		6	243	517.902		6	243	605.668		6	243	668.884
6	244	398.522		6	244	509.252		6	244	602.677		6	244	682.458
6	245	409.227		6	245	533.097		6	245	614.669		6	245	666.184
6	246	398.735		6	246	522.73		6	246	599.467		6	246	686.145
6	247	388.2		6	247	522.361		6	247	598.761		6	247	680.832
6	248	394.085		6	248	522.645		6	248	637.35		6	248	635.562
6	249	388.362		6	249	513.756		6	249	604.942		6	249	686.312
6	250	385.654		6	250	496.056		6	250	624.757		6	250	651.588
6	251	401.37		6	251	475.677		6	251	603.791		6	251	688.29
6	252	384.718		6	252	490.901		6	252	610.897		6	252	690.456
6	253	379.003		6	253	505.259		6	253	575.632		6	253	669.078
6	254	397.081		6	254	488.569		6	254	619.681		6	254	667.377
6	255	420.353		6	255	499.247		6	255	609.775		6	255	682.771
6	256	388.943		6	256	502.11		6	256	596.93		6	256	684.149
6	257	383.883		6	257	519.682		6	257	613.782		6	257	705.745
6	258	381.357		6	258	504.378		6	258	605.216		6	258	670.965
6	259	376.525		6	259	483.421		6	259	657.003		6	259	664.999
6	260	383.653		6	260	511.155		6	260	618.157		6	260	670.028
6	261	387.552		6	261	487.864		6	261	608.568		6	261	653.181
6	262	409.213		6	262	516.822		6	262	626.903		6	262	643.316
6	263	369.826		6	263	501.098		6	263	610.963		6	263	680.526
6	264	388.172		6	264	513.213		6	264	598.891		6	264	661.87
6	265	400.056		6	265	492.604		6	265	626.271		6	265	660.002
6	266	385.269		6	266	493.873		6	266	620.743		6	266	690.158
6	267	412.102		6	267	491.918		6	267	604.674		6	267	684.904
6	268	384.511		6	268	504.763		6	268	594.776		6	268	676.279
6	269	389.505		6	269	517.403		6	269	614.095		6	269	694.617
6	270	403.751		6	270	497.185		6	270	613.204		6	270	647.735
6	271	362.884		6	271	506.081		6	271	587.749		6	271	674.213
6	272	381.154		6	272	502.508		6	272	619.424		6	272	673.995
6	273	369.464		6	273	499.925		6	273	592.831		6	273	686.307
6	274	389.969		6	274	504.625		6	274	607.926		6	274	670.821
6	275	392.483		6	275	517.584		6	275	605.879		6	275	664.199
6	276	391.966		6	276	500.218		6	276	602.692		6	276	674.84
6	277	397.055		6	277	523.186		6	277	617.558		6	277	679.73
6	278	393.916		6	278	509.176		6	278	601.373		6	278	667.146
6	279	384.435		6	279	535.535		6	279	599.119		6	279	674.004
6	280	388.798		6	280	517.344		6	280	633.172		6	280	701.45
6	281	378.737		6	281	492.05		6	281	593.85		6	281	669.837
6	282	388.379		6	282	512.412		6	282	608.961		6	282	677.676
6	283	402.235		6	283	509.621		6	283	630.229		6	283	676.409
6	284	381.294		6	284	521.661		6	284	604.146		6	284	657.785
6	285	395.912		6	285	492.914		6	285	605.079		6	285	659.116
6	286	389.273		6	286	495.689		6	286	595.002		6	286	659.091
6	287	414.621		6	287	520.665		6	287	590.825		6	287	672.115
6	288	403.877		6	288	516.086		6	288	598.697		6	288	662.332
6	289	395.434		6	289	490.009		6	289	621.263		6	289	657.61
6	290	406.109		6	290	510.6		6	290	624.905		6	290	681.603
6	291	412.742		6	291	526.795		6	291	597.204		6	291	694.691
6	292	385.784		6	292	490.077		6	292	606.154		6	292	679.321
6	293	381.329		6	293	485.536		6	293	622.271		6	293	653.487
6	294	394.486		6	294	477.708		6	294	617.876		6	294	685.006
6	295	398.608		6	295	510.28		6	295	607.761		6	295	646.329
6	296	413.404		6	296	503.138		6	296	608.325		6	296	657.306
6	297	405.508		6	297	510.7		6	297	601.828		6	297	673.164
6	298	398.573		6	298	507.521		6	298	608.367		6	298	667.386
6	299	408.764		6	299	523.909		6	299	612.303		6	299	658.181
7	0	403.833		7	0	484.465		7	0	595.353		7	0	668.353
7	1	374.322		7	1	496.034		7	1	606.789		7	1	656.798
7	2	400.731		7	2	514.372		7	2	576.447		7	2	685.447
7	3	394.039		7	3	497.211		7	3	577.164		7	3	674.852
7	4	386.627		7	4	499.75		7	4	609.84		7	4	675.259
7	5	413.044		7	5	510.306		7	5	615.59		7	5	666.771
7	6	395.297		7	6	500.017		7	6	592.196		7	6	641.041
7	7	386.24		7	7	481.301		7	7	623.84		7	7	633.213
7	8	388.199		7	8	501.434		7	8	622.771		7	8	669.826
7	9	403.387		7	9	508.578		7	9	609.847		7	9	644.701
7	10	387.673		7	10	492.456		7	10	601.319		7	10	668.739
7	11	394.034		7	11	489.83		7	11	608.765		7	11	667.569
7	12	402.782		7	12	526.287		7	12	649.939		7	12	643.022
7	13	400.718		7	13	501.524		7	13	608.854		7	13	671.539
7	14	404.129		7	14	482.415		7	14	582.261		7	14	676.208
7	15	384.273		7	15	498.485		7	15	602.77		7	15	668.449
7	16	413.693		7	16	492.142		7	16	590.365		7	16	654.099
7	17	406.09		7	17	506.756		7	17	599.781		7	17	655.168
7	18	389.428		7	18	494.26		7	18	602.013		7	18	673.334
7	19	395.605		7	19	533.624		7	19	591.869		7	19	630.004
7	20	386.565		7	20	506.127		7	20	602.799		7	20	662.878
7	21	407.744		7	21	503.996		7	21	618.576		7	21	634.444
7	22	398.974		7	22	480.57		7	22	589.708		7	22	653.865
7	23	384.788		7	23	499.61		7	23	586.587		7	23	672.378
7	24	408.725		7	24	498.797		7	24	607.934		7	24	664.881
7	25	374.255		7	25	508.048		7	25	609.388		7	25	650.905
7	26	385.558		7	26	500.549		7	26	590.697		7	26	662.118
7	27	378.066		7	27	477.593		7	27	609.559		7	27	663.967
7	28	387.965		7	28	477.405		7	28	614.753		7	28	641.953
7	29	411.52		7	29	509.569		7	29	582.387		7	29	668.623
7	30	397.529		7	30	494.668		7	30	601.105		7	30	636.767
7	31	403.932		7	31	507.698		7	31	596.171		7	31	659.186
7	32	413.396		7	32	494.892		7	32	593.501		7	32	638.737
7	33	395.107		7	33	500.214		7	33	592.778		7	33	661.373
7	34	418.982		7	34	518.834		7	34	573.794		7	34	626.481
7	35	393.584		7	35	488.436		7	35	601.399		7	35	671.061
7	36	406.449		7	36	508.221		7	36	592.889		7	36	686.461
7	37	404.863		7	37	525.072		7	37	599.597		7	37	677.944
7	38	382.707		7	38	496.506		7	38	609.618		7	38	660.121
7	39	429.842		7	39	509.176		7	39	584.339		7	39	667.343
7	40	391.056		7	40	499.925		7	40	609.352		7	40	656.267
7	41	405.664		7	41	506.289		7	41	601.468		7	41	681.457
7	42	390.07		7	42	502.693		7	42	605.249		7	42	672.575
7	43	390.412		7	43	481.592		7	43	611.517		7	43	650.013
7	44	399.074		7	44	503.677		7	44	565.563		7	44	672.187
7	45	394.587		7	45	517.707		7	45	584.593		7	45	648.793
7	46	394.771		7	46	477.059		7	46	627.907		7	46	657.951
7	47	403.313		7	47	507.14		7	47	595.514		7	47	672.612
7	48	387.651		7	48	481.958		7	48	606.841		7	48	656.53
7	49	393.255		7	49	508.741		7	49	594.91		7	49	668.579
7	50	403.547		7	50	491.96		7	50	582.349		7	50	655.703
7	51	409.978		7	51	486.597		7	51	631.833		7	51	633.745
7	52	399.156		7	52	490.823		7	52	607.582		7	52	664.041
7	53	404.455		7	53	521.146		7	53	605.03		7	53	669.921
7	54	371.609		7	54	517.839		7	54	569.257		7	54	637.911
7	55	401.973		7	55	507.585		7	55	596.207		7	55	678.894
7	56	388.537		7	56	482.564		7	56	608.57		7	56	670.936
7	57	398.647		7	57	490.014		7	57	616.653		7	57	669.201
7	58	401.749		7	58	506.169		7	58	592.463		7	58	673.795
7	59	405.534		7	59	498.324		7	59	604.401		7	59	663.504
7	60	405.217		7	60	521.459		7	60	605.021		7	60	670.931
7	61	415.944		7	61	479.807		7	61	594.243		7	61	685.561
7	62	409.278		7	62	498.711		7	62	614.742		7	62	650.177
7	63	403.6		7	63	476.933		7	63	603.02		7	63	678.554
7	64	404.432		7	64	490.521		7	64	580.876		7	64	681.226
7	65	385.911		7	65	504.674		7	65	584.376		7	65	659.64
7	66	393.548		7	66	485.167		7	66	633.299		7	66	663.284
7	67	366.135		7	67	493.225		7	67	599.121		7	67	660.281
7	68	393.325		7	68	518.448		7	68	576.214		7	68	649.273
7	69	410.847		7	69	470.518		7	69	599.009		7	69	671.59
7	70	389.645		7	70	508.148		7	70	600.141		7	70	669.597
7	71	381.781		7	71	503.942		7	71	606.839		7	71	680.472
7	72	416.434		7	72	494.399		7	72	628.802		7	72	654.022
7	73	406.668		7	73	495.582		7	73	608.973		7	73	667.886
7	74	405.3		7	74	491.909		7	74	610.94		7	74	651.962
7	75	395.376		7	75	506.195		7	75	590.905		7	75	641.948
7	76	394.82		7	76	498.049		7	76	604.044		7	76	641.151
7	77	391.639		7	77	521.247		7	77	622.869		7	77	636.433
7	78	402.098		7	78	488.953		7	78	586.147		7	78	654.924
7	79	399.615		7	79	487.205		7	79	607.776		7	79	681.56
7	80	400.282		7	80	511.42		7	80	616.835		7	80	674.891
7	81	398.312		7	81	508.721		7	81	594.249		7	81	663.21
7	82	373.219		7	82	490.476		7	82	572.394		7	82	646.835
7	83	390.461		7	83	509.441		7	83	612.459		7	83	654.586
7	84	397.357		7	84	523.081		7	84	595.576		7	84	659.926
7	85	389.904		7	85	501.87		7	85	605.273		7	85	678.35
7	86	408.76		7	86	498.633		7	86	600.666		7	86	653.54
7	87	397.792		7	87	510.946		7	87	594.177		7	87	672.442
7	88	377.883		7	88	507.719		7	88	596.716		7	88	659.088
7	89	397.148		7	89	487.275		7	89	622.774		7	89	644.061
7	90	391.96		7	90	514.817		7	90	597.489		7	90	650.179
7	91	397.829		7	91	516.077		7	91	589.598		7	91	629.045
7	92	373.419		7	92	493.957		7	92	602.985		7	92	693.015
7	93	400.032		7	93	502.872		7	93	617.021		7	93	674.691
7	94	411.293		7	94	516.734		7	94	627.917		7	94	665.961
7	95	401.259		7	95	499.851		7	95	600.28		7	95	654.702
7	96	377.535		7	96	493.189		7	96	578.34		7	96	650.853
7	97	404.953		7	97	492.933		7	97	593.596		7	97	672.732
7	98	399.575		7	98	493.465		7	98	581.964		7	98	662.909
7	99	391.1		7	99	517.107		7	99	617.271		7	99	645.212
7	100	385.936		7	100	505.213		7	100	595.153		7	100	659.304
7	101	399.335		7	101	498.692		7	101	602.99		7	101	648.373
7	102	392.985		7	102	520.786		7	102	593.963		7	102	666.999
7	103	386.898		7	103	493.642		7	103	577.319		7	103	694.34
7	104	414.157		7	104	500.726		7	104	610.062		7	104	672.843
7	105	396.542		7	105	504.62		7	105	611.603		7	105	655.059
7	106	398.271		7	106	480.841		7	106	615.158		7	106	656.366
7	107	402.491		7	107	508.525		7	107	603.584		7	107	689.233
7	108	395.661		7	108	514.11		7	108	614.331		7	108	704.01
7	109	411.685		7	109	506.603		7	109	608.399		7	109	653.976
7	110	396.687		7	110	494.327		7	110	605.157		7	110	667.446
7	111	411.136		7	111	497.848		7	111	606.073		7	111	640.319
7	112	392.805		7	112	494.955		7	112	608.623		7	112	643.644
7	113	395.506		7	113	508.816		7	113	606.531		7	113	654.396
7	114	392.419		7	114	525.082		7	114	628.757		7	114	655.172
7	115	406.849		7	115	525.006		7	115	603.04		7	115	665.131
7	116	387.524		7	116	503.5		7	116	587.75		7	116	653.826
7	117	393.11		7	117	506.396		7	117	632.168		7	117	650.03
7	118	404.691		7	118	493.154		7	118	608.937		7	118	678.809
7	119	397.907		7	119	498.995		7	119	586.324		7	119	679.756
7	120	389.855		7	120	511.217		7	120	615.397		7	120	683.375
7	121	388.465		7	121	491.177		7	121	592.755		7	121	688.605
7	122	389.134		7	122	497.206		7	122	602.708		7	122	660.035
7	123	412.056		7	123	506.005		7	123	578.439		7	123	652.175
7	124	379.163		7	124	507.684		7	124	603.569		7	124	658.072
7	125	397.97		7	125	486.048		7	125	595.909		7	125	662.006
7	126	394.318		7	126	508.342		7	126	586.632		7	126	634.999
7	127	399.235		7	127	495.127		7	127	606.453		7	127	668.278
7	128	394.58		7	128	506.661		7	128	595.419		7	128	656.602
7	129	402.564		7	129	510.804		7	129	600.881		7	129	679.224
7	130	397.126		7	130	495.454		7	130	590.841		7	130	656.859
7	131	376.414		7	131	514.289		7	131	598.547		7	131	650.241
7	132	404.416		7	132	493.229		7	132	601.592		7	132	682.871
7	133	407.204		7	133	512.551		7	133	606.908		7	133	661.851
7	134	388.92		7	134	486.014		7	134	597.763		7	134	692.543
7	135	413.053		7	135	511.282		7	135	589.202		7	135	671.407
7	136	405.219		7	136	506.561		7	136	605.891		7	136	629.878
7	137	399.779		7	137	485.323		7	137	621.178		7	137	639.803
7	138	386.123		7	138	494.767		7	138	598.924		7	138	652.68
7	139	403.209		7	139	500.257		7	139	609.965		7	139	644.373
7	140	426.707		7	140	498.92		7	140	592.465		7	140	669.219
7	141	393.449		7	141	495.745		7	141	599.932		7	141	654.433
7	142	392.82		7	142	510.302		7	142	590.142		7	142	673.314
7	143	399.404		7	143	484.954		7	143	615.95		7	143	684.985
7	144	408.774		7	144	496.358		7	144	606.628		7	144	708.68
7	145	412.117		7	145	504.277		7	145	628.024		7	145	661.252
7	146	400.053		7	146	515.27		7	146	598.536		7	146	677.726
7	147	403.802		7	147	503.744		7	147	601.43		7	147	686.164
7	148	377.722		7	148	488.676		7	148	603.126		7	148	670.439
7	149	393.84		7	149	515.062		7	149	612.035		7	149	662.118
7	150	394.479		7	150	514.478		7	150	588.72		7	150	668.82
7	151	418.313		7	151	486.435		7	151	597.007		7	151	661.558
7	152	392.683		7	152	478.407		7	152	587.376		7	152	679.173
7	153	417.012		7	153	494.488		7	153	585.868		7	153	669.091
7	154	395.642		7	154	505.546		7	154	612.984		7	154	671.973
7	155	416.583		7	155	490.734		7	155	588.012		7	155	658.364
7	156	397.291		7	156	484.31		7	156	595.319		7	156	671.716
7	157	417.799		7	157	473.723		7	157	593.619		7	157	639.849
7	158	394.169		7	158	506.087		7	158	594.579		7	158	638.238
7	159	391.229		7	159	508.762		7	159	573.281		7	159	643.807
7	160	390.117		7	160	504.414		7	160	642.68		7	160	642.459
7	161	390.898		7	161	521.048		7	161	610.194		7	161	666.426
7	162	407.647		7	162	496.213		7	162	584.356		7	162	633.2
7	163	402.532		7	163	477.452		7	163	620.299		7	163	639.714
7	164	397.67		7	164	506.286		7	164	608.568		7	164	655.464
7	165	398.541		7	165	521.927		7	165	614.422		7	165	675.655
7	166	425.698		7	166	518.399		7	166	595.478		7	166	640.559
7	167	392.552		7	167	500.531		7	167	580.611		7	167	653.209
7	168	397.143		7	168	510.907		7	168	600.066		7	168	678.36
7	169	412.399		7	169	514.519		7	169	586.317		7	169	648.298
7	170	398.527		7	170	490.063		7	170	588.145		7	170	654.306
7	171	399.825		7	171	498.407		7	171	601.198		7	171	647.718
7	172	421.608		7	172	512.047		7	172	600.345		7	172	659.558
7	173	406.18		7	173	521.385		7	173	578.832		7	173	666.752
7	174	407.739		7	174	503.675		7	174	599.007		7	174	634.698
7	175	402.978		7	175	500.824		7	175	621.689		7	175	640.594
7	176	401.005		7	176	493.159		7	176	607.041		7	176	647.385
7	177	406.702		7	177	522.134		7	177	595.082		7	177	668.635
7	178	386.03		7	178	507.336		7	178	587.812		7	178	664.981
7	179	411.448		7	179	506.053		7	179	612.142		7	179	662.352
7	180	404.548		7	180	475.48		7	180	618.387		7	180	637.771
7	181	397.252		7	181	489.568		7	181	612.421		7	181	665.655
7	182	429.149		7	182	515.068		7	182	603.958		7	182	657.064
7	183	394.689		7	183	506.623		7	183	600.434		7	183	692.638
7	184	403.156		7	184	500.238		7	184	583.446		7	184	673.415
7	185	404.037		7	185	508.045		7	185	610.093		7	185	668.19
7	186	391.597		7	186	508.781		7	186	595.717		7	186	668.576
7	187	407.047		7	187	493.683		7	187	575.461		7	187	656.932
7	188	401.259		7	188	503.984		7	188	599.402		7	188	664.007
7	189	399.359		7	189	479.304		7	189	626.553		7	189	663.486
7	190	405.016		7	190	527.109		7	190	576.271		7	190	639.341
7	191	393.075		7	191	502.159		7	191	608.304		7	191	633.575
7	192	408.998		7	192	484.616		7	192	597.504		7	192	664.907
7	193	392.915		7	193	502.109		7	193	610.911		7	193	672.107
7	194	405.768		7	194	503.995		7	194	599.573		7	194	689.78
7	195	410.313		7	195	510.386		7	195	588.185		7	195	669.705
7	196	391.635		7	196	500.372		7	196	601.696		7	196	659.789
[truncated: 7,003 more rows]

## Sheet: Simulation_gauss
Simulation	gaussian fitting
398 nm				501 nm				599 nm				658 nm
video_id	frame_id	estimated sigma		video_id	frame_id	estimated sigma		video_id	frame	estimated sigma		video_id	frame	estimated sigma
1	0	163.983		1	0	186.286		1	0	230.49		1	0	240.565
1	1	168.819		1	1	195.365		1	1	216.707		1	1	243.431
1	2	159.309		1	2	187.953		1	2	164.496		1	2	266.297
1	3	163.237		1	3	193.401		1	3	228.238		1	3	263.361
1	4	166.319		1	4	192.772		1	4	232.407		1	4	225.555
1	5	169.962		1	5	185.727		1	5	231.598		1	5	257.37
1	6	153.714		1	6	196.955		1	6	173.63		1	6	157.62
1	7	152.604		1	7	181.008		1	7	198.249		1	7	204.252
1	8	161.4		1	8	195.631		1	8	229.602		1	8	245.771
1	9	136.772		1	9	163.41		1	9	236.065		1	9	248.956
1	10	154.18		1	10	184.936		1	10	219.274		1	10	203.906
1	11	157.576		1	11	144.711		1	11	253.252		1	11	173.808
1	12	161.965		1	12	198.64		1	12	230.947		1	12	242.532
1	13	162.097		1	13	191.97		1	13	181.165		1	13	230.099
1	14	157.873		1	14	185.679		1	14	166.409		1	14	246.255
1	15	163.531		1	15	188.895		1	15	225.623		1	15	245.286
1	16	161.612		1	16	188.502		1	16	226.084		1	16	252.186
1	17	157.703		1	17	192.619		1	17	173.266		1	17	240.258
1	18	168.429		1	18	188.632		1	18	227.494		1	18	248.117
1	19	152.964		1	19	187.238		1	19	258.038		1	19	210.395
1	20	129.144		1	20	183.73		1	20	166.987		1	20	137.958
1	21	158.79		1	21	192.409		1	21	241.749		1	21	255.334
1	22	164.894		1	22	140.668		1	22	193.733		1	22	256.78
1	23	129.28		1	23	165.925		1	23	234.545		1	23	242.391
1	24	163.839		1	24	182.489		1	24	150.683		1	24	233.608
1	25	157.8		1	25	190.857		1	25	228.311		1	25	256.767
1	26	163.845		1	26	189.874		1	26	225.402		1	26	244.043
1	27	165.73		1	27	194.207		1	27	224.885		1	27	246.458
1	28	166.493		1	28	186.6		1	28	234.163		1	28	233.626
1	29	153.776		1	29	189.417		1	29	206.387		1	29	226.98
1	30	165.778		1	30	190.101		1	30	219.732		1	30	249.927
1	31	157.426		1	31	185.121		1	31	147.928		1	31	177.995
1	32	148.409		1	32	190.472		1	32	194.688		1	32	263.811
1	33	164.553		1	33	189.324		1	33	185.519		1	33	238.742
1	34	161.006		1	34	166.604		1	34	191.288		1	34	180.296
1	35	161.372		1	35	190.033		1	35	154.07		1	35	183.101
1	36	160.828		1	36	191.393		1	36	171.456		1	36	215.564
1	37	149.222		1	37	188.534		1	37	160.076		1	37	178.145
1	38	128.58		1	38	189.232		1	38	191.008		1	38	138.595
1	39	150.394		1	39	189.617		1	39	192.443		1	39	163.703
1	40	165.026		1	40	192.261		1	40	154.421		1	40	250.557
1	41	154.23		1	41	163.138		1	41	218.476		1	41	233.165
1	42	162.044		1	42	201.368		1	42	228.257		1	42	200.03
1	43	186.518		1	43	187.717		1	43	160.745		1	43	271.845
1	44	155.054		1	44	207.91		1	44	228.959		1	44	249.379
1	45	163.537		1	45	192.498		1	45	222.404		1	45	242.222
1	46	167.13		1	46	194.239		1	46	159.546		1	46	242.853
1	47	123.568		1	47	189.241		1	47	181.244		1	47	243.292
1	48	159.635		1	48	198.959		1	48	234.268		1	48	245.275
1	49	145.001		1	49	193.737		1	49	177.579		1	49	157.126
1	50	158.945		1	50	140.301		1	50	212.316		1	50	269.881
1	51	159.367		1	51	180.547		1	51	223.835		1	51	243.767
1	52	156.939		1	52	190.37		1	52	218.688		1	52	168.712
1	53	168.707		1	53	194.976		1	53	182.848		1	53	174.119
1	54	161.341		1	54	154.909		1	54	192.971		1	54	240.285
1	55	176.727		1	55	188.78		1	55	231.962		1	55	164.821
1	56	164.276		1	56	188.447		1	56	196.251		1	56	239.527
1	57	158.557		1	57	185.429		1	57	196.108		1	57	183.497
1	58	157.969		1	58	191.726		1	58	227.809		1	58	153.944
1	59	134.757		1	59	158.818		1	59	222.746		1	59	250.102
1	60	159.629		1	60	190.082		1	60	205.524		1	60	220.749
1	61	164.042		1	61	169.281		1	61	232.683		1	61	186.216
1	62	141.059		1	62	141.186		1	62	168.778		1	62	244.678
1	63	169.304		1	63	196.873		1	63	241.039		1	63	247.663
1	64	160.144		1	64	200.722		1	64	227.436		1	64	260.061
1	65	131.753		1	65	180.676		1	65	194.316		1	65	247.787
1	66	160.861		1	66	191.324		1	66	239.218		1	66	222.919
1	67	158.937		1	67	190.925		1	67	233.499		1	67	237.707
1	68	165.941		1	68	182.945		1	68	238.398		1	68	242.876
1	69	160.223		1	69	189.208		1	69	213.919		1	69	250.466
1	70	160.961		1	70	188.868		1	70	225.725		1	70	218.102
1	71	160.502		1	71	186.506		1	71	172.626		1	71	249.654
1	72	158.221		1	72	187.025		1	72	242.092		1	72	250.145
1	73	159.653		1	73	190.248		1	73	213.417		1	73	161.84
1	74	157.712		1	74	200.642		1	74	217.823		1	74	248.404
1	75	171.436		1	75	189.326		1	75	177.665		1	75	150.025
1	76	163.363		1	76	187.676		1	76	230.572		1	76	249.411
1	77	162.193		1	77	195.544		1	77	236.793		1	77	255.062
1	78	166.795		1	78	187.093		1	78	222.762		1	78	244.896
1	79	147.106		1	79	182.82		1	79	170.535		1	79	233.518
1	80	139.838		1	80	171.87		1	80	177.016		1	80	222.408
1	81	169.304		1	81	189.32		1	81	262.917		1	81	217.471
1	82	157.614		1	82	170.978		1	82	245.218		1	82	166.582
1	83	173.885		1	83	191.027		1	83	162.518		1	83	232.314
1	84	148.775		1	84	190.884		1	84	213.482		1	84	241.901
1	85	156.665		1	85	193.386		1	85	157.225		1	85	242.971
1	86	160.859		1	86	189.252		1	86	221.547		1	86	197.934
1	87	125.975		1	87	192.502		1	87	151.377		1	87	248.606
1	88	155.073		1	88	161.768		1	88	232.923		1	88	223.233
1	89	165.772		1	89	182.378		1	89	225.696		1	89	233.28
1	90	123		1	90	186.557		1	90	213.928		1	90	134.034
1	91	154.955		1	91	201.016		1	91	159.494		1	91	222.774
1	92	173.443		1	92	189.917		1	92	193.29		1	92	242.734
1	93	141.955		1	93	188.683		1	93	162.774		1	93	205.273
1	94	157.03		1	94	202.303		1	94	218.002		1	94	235.09
1	95	170.276		1	95	177.478		1	95	198.28		1	95	248.266
1	96	166.57		1	96	189.352		1	96	156.433		1	96	179.866
1	97	163.47		1	97	146.853		1	97	243.442		1	97	230.91
1	98	156.968		1	98	185.322		1	98	192.677		1	98	231.894
1	99	163.236		1	99	197.507		1	99	196.303		1	99	254.717
1	100	161.226		1	100	195.145		1	100	213.557		1	100	248.951
1	101	158.124		1	101	188.322		1	101	216.875		1	101	247.882
1	102	161.299		1	102	191.688		1	102	236.116		1	102	163.894
1	103	162.01		1	103	195.242		1	103	233.63		1	103	255.693
1	104	161.093		1	104	165.413		1	104	159.515		1	104	186.911
1	105	156.967		1	105	188.316		1	105	230.956		1	105	242.841
1	106	122.8		1	106	188.86		1	106	214.223		1	106	242.555
1	107	156.47		1	107	187.84		1	107	225.173		1	107	245.622
1	108	149.16		1	108	191.153		1	108	215.454		1	108	203.417
1	109	151.192		1	109	189.473		1	109	256.438		1	109	253.175
1	110	160.53		1	110	190.576		1	110	233.091		1	110	245.306
1	111	158.68		1	111	179.899		1	111	157.295		1	111	244.593
1	112	166.981		1	112	194.269		1	112	183.658		1	112	170.765
1	113	165.019		1	113	188.506		1	113	240.794		1	113	241.932
1	114	148.325		1	114	181.908		1	114	200.525		1	114	185.794
1	115	160.074		1	115	185.89		1	115	230.29		1	115	235.374
1	116	168.778		1	116	190.689		1	116	231.692		1	116	249.607
1	117	128.727		1	117	144.648		1	117	234.288		1	117	276.077
1	118	164.798		1	118	186.967		1	118	173.363		1	118	244.873
1	119	125.99		1	119	179.081		1	119	215.526		1	119	253.528
1	120	164.76		1	120	187.998		1	120	192.266		1	120	179.778
1	121	158.25		1	121	191.317		1	121	234.955		1	121	248.681
1	122	158.064		1	122	190.451		1	122	189.672		1	122	261.31
1	123	148.93		1	123	191.162		1	123	252.738		1	123	240.62
1	124	164.971		1	124	182.604		1	124	236.059		1	124	258.343
1	125	154.038		1	125	186.263		1	125	148.056		1	125	271.702
1	126	161.518		1	126	189.56		1	126	226.956		1	126	181.902
1	127	163.596		1	127	175.776		1	127	204.444		1	127	166.338
1	128	159.275		1	128	189.768		1	128	217.442		1	128	258.681
1	129	159.663		1	129	198.183		1	129	232.606		1	129	258.218
1	130	120.339		1	130	186.627		1	130	174.285		1	130	241.036
1	131	154.033		1	131	198.539		1	131	143.852		1	131	175.578
1	132	159.211		1	132	140.832		1	132	236.781		1	132	246.554
1	133	161.39		1	133	213.038		1	133	222.314		1	133	239.256
1	134	118.52		1	134	152.332		1	134	239.513		1	134	246.902
1	135	178.395		1	135	191.132		1	135	195.74		1	135	248.745
1	136	125.527		1	136	183.514		1	136	231.265		1	136	230.328
1	137	155.37		1	137	177.919		1	137	174.582		1	137	252.99
1	138	160.167		1	138	183.649		1	138	259.586		1	138	239.33
1	139	168.825		1	139	184.011		1	139	231.868		1	139	245.351
1	140	157.551		1	140	183.756		1	140	247.614		1	140	250.275
1	141	160.978		1	141	193.128		1	141	214.014		1	141	201.614
1	142	165.301		1	142	184.437		1	142	223.303		1	142	231.524
1	143	154.695		1	143	194.585		1	143	240.634		1	143	243.797
1	144	163.035		1	144	201.551		1	144	236.409		1	144	165.17
1	145	162.572		1	145	184.875		1	145	229.382		1	145	197.107
1	146	159.465		1	146	184.497		1	146	217.331		1	146	246.434
1	147	161.554		1	147	196.162		1	147	210.326		1	147	207.223
1	148	163.072		1	148	182.055		1	148	228		1	148	184.015
1	149	124.778		1	149	182.528		1	149	229.228		1	149	229.904
1	150	165.5		1	150	182.696		1	150	229.914		1	150	205.858
1	151	138.028		1	151	183.619		1	151	230.888		1	151	238.15
1	152	129.935		1	152	199.702		1	152	248.423		1	152	235.078
1	153	129.016		1	153	187.083		1	153	152.823		1	153	253.231
1	154	161.178		1	154	151.983		1	154	177.345		1	154	203.01
1	155	158.146		1	155	185.927		1	155	231.134		1	155	242.803
1	156	164.368		1	156	188.161		1	156	232.887		1	156	162.486
1	157	158.596		1	157	162.413		1	157	175.893		1	157	251.604
1	158	164.417		1	158	191.071		1	158	229.957		1	158	172.452
1	159	134.556		1	159	136.156		1	159	164.308		1	159	244.552
1	160	158.879		1	160	189.384		1	160	147.844		1	160	253.936
1	161	167.481		1	161	186.269		1	161	216.817		1	161	256.439
1	162	161.608		1	162	189.676		1	162	174.464		1	162	243.576
1	163	164.834		1	163	194.59		1	163	168.001		1	163	246.614
1	164	157.007		1	164	186.665		1	164	241.536		1	164	191.46
1	165	158.53		1	165	192.62		1	165	206.795		1	165	202.315
1	166	165.804		1	166	192.72		1	166	224.842		1	166	172.707
1	167	158.827		1	167	191.281		1	167	220.797		1	167	195.646
1	168	144.659		1	168	184.137		1	168	240.096		1	168	249.734
1	169	157.582		1	169	184.358		1	169	248.442		1	169	258.35
1	170	166.113		1	170	186.264		1	170	145.16		1	170	260.716
1	171	163.171		1	171	190.772		1	171	223.355		1	171	192.198
1	172	160.098		1	172	196.649		1	172	229.334		1	172	247.415
1	173	167.859		1	173	194.666		1	173	229.313		1	173	169.384
1	174	165.719		1	174	183.732		1	174	246.846		1	174	229.997
1	175	163.217		1	175	128.29		1	175	230.825		1	175	227.106
1	176	167.917		1	176	183.081		1	176	167.515		1	176	186.134
1	177	167.467		1	177	151.837		1	177	179.826		1	177	243.346
1	178	155.588		1	178	186.047		1	178	176.488		1	178	182.247
1	179	156.723		1	179	188.077		1	179	233.314		1	179	237.827
1	180	163.377		1	180	183.642		1	180	189.826		1	180	250.995
1	181	158.575		1	181	200.164		1	181	235.466		1	181	261.247
1	182	157.618		1	182	192.943		1	182	237.932		1	182	218.144
1	183	160.154		1	183	147.133		1	183	237.991		1	183	244.078
1	184	163.105		1	184	188.545		1	184	231.3		1	184	214.078
1	185	162.615		1	185	180.79		1	185	158.714		1	185	237.988
1	186	162.279		1	186	187.309		1	186	215.947		1	186	234.59
1	187	163.252		1	187	170.817		1	187	136.369		1	187	236.24
1	188	130.182		1	188	189.403		1	188	152.836		1	188	248.879
1	189	157.908		1	189	196.945		1	189	169.998		1	189	245.594
1	190	160.641		1	190	199.468		1	190	171.566		1	190	195.438
1	191	165.729		1	191	185.989		1	191	257.667		1	191	246.802
1	192	160.437		1	192	186.613		1	192	235.191		1	192	230.903
1	193	160.553		1	193	189.231		1	193	233.79		1	193	164.097
1	194	163.688		1	194	185.234		1	194	221.965		1	194	253.376
1	195	166.047		1	195	190.874		1	195	222.989		1	195	245.158
1	196	164.158		1	196	180.493		1	196	240.427		1	196	234.28
1	197	162.418		1	197	153.767		1	197	194.976		1	197	220.149
1	198	158.512		1	198	185.597		1	198	228.273		1	198	207.747
1	199	158.161		1	199	179.637		1	199	235.606		1	199	195.893
1	200	161.127		1	200	183.218		1	200	238.298		1	200	180.612
1	201	161.319		1	201	185.494		1	201	183.078		1	201	256.679
1	202	159.483		1	202	187.506		1	202	218.852		1	202	229.497
1	203	156.365		1	203	193.682		1	203	212.136		1	203	178.351
1	204	164.599		1	204	188.571		1	204	220.396		1	204	195.044
1	205	163.625		1	205	194.306		1	205	249.759		1	205	239.733
1	206	142.643		1	206	189.651		1	206	228.513		1	206	216.985
1	207	150.759		1	207	183.708		1	207	217.374		1	207	151.498
1	208	162.219		1	208	190.589		1	208	156.27		1	208	247.652
1	209	159.581		1	209	192.238		1	209	188.189		1	209	257.437
1	210	161.468		1	210	188.392		1	210	235.144		1	210	243.413
1	211	151.736		1	211	186.383		1	211	227.822		1	211	232.392
1	212	171.772		1	212	194.68		1	212	242.871		1	212	232.791
1	213	118.682		1	213	184.142		1	213	217.072		1	213	132.338
1	214	155.62		1	214	189.736		1	214	241.303		1	214	164.488
1	215	159.983		1	215	186.055		1	215	238.325		1	215	239.209
1	216	162.537		1	216	194.168		1	216	254.481		1	216	245.66
1	217	149.338		1	217	198.298		1	217	203.656		1	217	256.724
1	218	164.689		1	218	191.828		1	218	220.199		1	218	251.529
1	219	156.563		1	219	194.327		1	219	193.71		1	219	207.18
1	220	145.17		1	220	193.966		1	220	223.449		1	220	234.386
1	221	155.022		1	221	192.345		1	221	242.069		1	221	227.839
1	222	159.392		1	222	183.791		1	222	247.754		1	222	227.374
1	223	160.823		1	223	200.292		1	223	223.061		1	223	268.505
1	224	160.234		1	224	195.746		1	224	226.734		1	224	202.099
1	225	135.31		1	225	195.773		1	225	190.539		1	225	242.983
1	226	168.511		1	226	205.356		1	226	137.054		1	226	235.174
1	227	169.273		1	227	177.666		1	227	202.354		1	227	154.248
1	228	171.422		1	228	187.151		1	228	183.207		1	228	249.441
1	229	138.206		1	229	165.586		1	229	156.62		1	229	150.824
1	230	151.053		1	230	190.514		1	230	222.168		1	230	252.94
1	231	133.776		1	231	181.628		1	231	229.126		1	231	231.588
1	232	161.018		1	232	183.481		1	232	187.264		1	232	238.199
1	233	156.841		1	233	194.889		1	233	216.532		1	233	204.675
1	234	157.063		1	234	191.567		1	234	239.737		1	234	232.529
1	235	164.794		1	235	193.647		1	235	220.759		1	235	239.692
1	236	155.022		1	236	183.955		1	236	232.03		1	236	175.251
1	237	169.652		1	237	193.288		1	237	234.719		1	237	224.782
1	238	155.067		1	238	187.619		1	238	237.058		1	238	212.423
1	239	168.358		1	239	176.14		1	239	167.502		1	239	220.169
1	240	161.057		1	240	154.176		1	240	225.399		1	240	150.427
1	241	162.647		1	241	200.318		1	241	215.495		1	241	173.857
1	242	161.949		1	242	188.522		1	242	238.3		1	242	225.733
1	243	162.1		1	243	181.479		1	243	215.63		1	243	210.342
1	244	161.895		1	244	194.095		1	244	207.387		1	244	247.071
1	245	171.913		1	245	190.369		1	245	164.946		1	245	228.769
1	246	161.583		1	246	187.69		1	246	197.204		1	246	255.914
1	247	160.625		1	247	152.552		1	247	169.826		1	247	225.697
1	248	157.681		1	248	192.637		1	248	226.621		1	248	245.767
1	249	160.704		1	249	185.622		1	249	244.087		1	249	183.968
1	250	163.646		1	250	196.628		1	250	229.271		1	250	233.507
1	251	153.102		1	251	192.011		1	251	223.108		1	251	184.378
1	252	167.255		1	252	182.148		1	252	198.397		1	252	236.912
1	253	161.839		1	253	195.571		1	253	219.072		1	253	247.381
1	254	159.616		1	254	187.711		1	254	146.657		1	254	242.239
1	255	138.406		1	255	186.855		1	255	231.957		1	255	230.466
1	256	157.23		1	256	199.036		1	256	209.036		1	256	201.269
1	257	161.485		1	257	188.341		1	257	235.203		1	257	222.234
1	258	164.173		1	258	145.627		1	258	109.533		1	258	265.338
1	259	162.126		1	259	182.507		1	259	219.826		1	259	219.968
1	260	166.712		1	260	200.301		1	260	225.774		1	260	251.567
1	261	162.142		1	261	140.389		1	261	202.98		1	261	203.112
1	262	121.549		1	262	192.824		1	262	218.774		1	262	192.813
1	263	155.597		1	263	194.26		1	263	227.991		1	263	224.473
1	264	163.146		1	264	184.898		1	264	144.383		1	264	189.287
1	265	163.298		1	265	192.924		1	265	217.93		1	265	241.642
1	266	170.028		1	266	197.348		1	266	227.103		1	266	259.343
1	267	144.274		1	267	187.476		1	267	220.942		1	267	159.28
1	268	159.993		1	268	186.274		1	268	228.034		1	268	230.932
1	269	154.136		1	269	196.55		1	269	216.063		1	269	212.638
1	270	155.249		1	270	200.429		1	270	238.947		1	270	240.906
1	271	135.338		1	271	174.361		1	271	268.894		1	271	241.914
1	272	156.827		1	272	165.684		1	272	175.817		1	272	260.334
1	273	164.749		1	273	192.377		1	273	202.68		1	273	248.716
1	274	159.98		1	274	194.889		1	274	213.497		1	274	248.218
1	275	156.413		1	275	185.386		1	275	238.595		1	275	245.365
1	276	166.374		1	276	171.99		1	276	180.836		1	276	244.809
1	277	163.78		1	277	192.714		1	277	226.028		1	277	250.577
1	278	126.005		1	278	190.376		1	278	236.776		1	278	248.511
1	279	163.921		1	279	197.655		1	279	231.67		1	279	214.775
1	280	165.562		1	280	188.539		1	280	223.962		1	280	251.97
1	281	145.545		1	281	186.691		1	281	203.498		1	281	188.191
1	282	159.378		1	282	179.784		1	282	244.255		1	282	210.699
1	283	147.237		1	283	184.565		1	283	232.085		1	283	200.595
1	284	161.479		1	284	185.254		1	284	236.514		1	284	259.24
1	285	156.305		1	285	206.016		1	285	210.771		1	285	229.821
1	286	168.428		1	286	181.248		1	286	186.272		1	286	263.498
1	287	158.613		1	287	185.583		1	287	232.933		1	287	243.632
1	288	152.218		1	288	204.95		1	288	232.929		1	288	128.789
1	289	156.434		1	289	194.155		1	289	224.862		1	289	266.316
1	290	156.323		1	290	187.147		1	290	169.058		1	290	188.589
1	291	167.353		1	291	184.036		1	291	227.819		1	291	243.207
1	292	161.745		1	292	184.19		1	292	214.177		1	292	256.025
1	293	160.118		1	293	183.936		1	293	236.097		1	293	238.858
1	294	156.852		1	294	185.013		1	294	157.94		1	294	241.694
1	295	168.773		1	295	182.251		1	295	219.815		1	295	197.274
1	296	137.748		1	296	189.206		1	296	183.585		1	296	234.709
1	297	160.055		1	297	181.804		1	297	224.509		1	297	239.504
1	298	120.43		1	298	186.02		1	298	157.954		1	298	243.107
1	299	154.131		1	299	150.223		1	299	224.26		1	299	232.388
2	0	164.644		2	0	200.234		2	0	218.699		2	0	232.518
2	1	160.29		2	1	192.99		2	1	222.811		2	1	234.306
2	2	162.087		2	2	183.803		2	2	163.657		2	2	211.112
2	3	162.342		2	3	181.997		2	3	222.641		2	3	256.377
2	4	165.723		2	4	192.3		2	4	151.537		2	4	250.172
2	5	166.272		2	5	181.952		2	5	218.415		2	5	262.374
2	6	159.096		2	6	197.692		2	6	252.868		2	6	253.485
2	7	136.143		2	7	192.711		2	7	221.073		2	7	248.353
2	8	172.381		2	8	202.236		2	8	216.487		2	8	246.039
2	9	159.534		2	9	140.55		2	9	141.18		2	9	248.477
2	10	159.733		2	10	185.628		2	10	123.894		2	10	249.44
2	11	169.535		2	11	201.357		2	11	166.467		2	11	261.71
2	12	160.305		2	12	193.684		2	12	222.159		2	12	261.303
2	13	155.413		2	13	190.514		2	13	195.76		2	13	249.56
2	14	165.062		2	14	185.615		2	14	220.762		2	14	293.454
2	15	165.572		2	15	197.052		2	15	221.89		2	15	257.077
2	16	159.333		2	16	183.696		2	16	230.317		2	16	220.37
2	17	138.863		2	17	199.775		2	17	230.627		2	17	220.323
2	18	158.811		2	18	195.591		2	18	221.558		2	18	248.166
2	19	127.528		2	19	189.758		2	19	214.492		2	19	243.216
2	20	159.886		2	20	148.163		2	20	236.508		2	20	221.441
2	21	140.021		2	21	214.761		2	21	354.982		2	21	255.699
2	22	126.846		2	22	196.666		2	22	222.51		2	22	247.964
2	23	160.332		2	23	187.903		2	23	227.736		2	23	257.032
2	24	164.629		2	24	193.519		2	24	222.414		2	24	288.529
2	25	159.803		2	25	196.153		2	25	262.386		2	25	253.472
2	26	158.154		2	26	198.871		2	26	244.12		2	26	171.88
2	27	162.469		2	27	199.403		2	27	202.746		2	27	251.465
2	28	159.548		2	28	193.571		2	28	226.83		2	28	285.503
2	29	162.704		2	29	192.869		2	29	133.565		2	29	247.756
2	30	156.694		2	30	201.102		2	30	220.857		2	30	150.833
2	31	153.173		2	31	198.172		2	31	177.585		2	31	233.401
2	32	164.924		2	32	192.379		2	32	211.889		2	32	248.411
2	33	128.973		2	33	192.811		2	33	163.736		2	33	253.478
2	34	152.906		2	34	191.89		2	34	218.835		2	34	242.52
2	35	160.211		2	35	187.601		2	35	164.779		2	35	233.443
2	36	167.19		2	36	187.675		2	36	138.277		2	36	217.258
2	37	140.546		2	37	157.757		2	37	215.012		2	37	249.953
2	38	148.784		2	38	185.278		2	38	241.766		2	38	250.649
2	39	155.829		2	39	143.357		2	39	173.095		2	39	250.183
2	40	161.792		2	40	197.774		2	40	161.385		2	40	238.076
2	41	155.201		2	41	181.512		2	41	223.681		2	41	236.647
2	42	137.223		2	42	200.282		2	42	185.34		2	42	249.704
2	43	162.142		2	43	200.38		2	43	227.828		2	43	255.034
2	44	158.572		2	44	205.62		2	44	235.264		2	44	257.973
2	45	145.566		2	45	205.327		2	45	215.409		2	45	259.005
2	46	144.347		2	46	194.772		2	46	180.458		2	46	231.194
2	47	141.577		2	47	191.012		2	47	246.58		2	47	153.916
2	48	168.048		2	48	201.916		2	48	213.033		2	48	191.161
2	49	158.642		2	49	196.849		2	49	188.936		2	49	240.224
2	50	164.188		2	50	189.537		2	50	217.911		2	50	177.232
2	51	165.351		2	51	155.743		2	51	175.471		2	51	262.18
2	52	171.762		2	52	182.862		2	52	204.61		2	52	249.468
2	53	148.036		2	53	197.49		2	53	216.215		2	53	290.716
2	54	164.085		2	54	189.356		2	54	233.4		2	54	259.169
2	55	155.734		2	55	200.878		2	55	207.69		2	55	255.484
2	56	161.038		2	56	203.614		2	56	227.731		2	56	204.918
2	57	158.197		2	57	189.881		2	57	157.305		2	57	242.314
2	58	141.155		2	58	183.84		2	58	181.188		2	58	231.078
2	59	144.579		2	59	193.92		2	59	173.276		2	59	184.915
2	60	163.389		2	60	194.382		2	60	237.314		2	60	250.325
2	61	157.73		2	61	200.407		2	61	195.729		2	61	253.535
2	62	163.146		2	62	176.749		2	62	215.963		2	62	237.36
2	63	159.016		2	63	199.913		2	63	225.174		2	63	259.144
2	64	159.198		2	64	193.105		2	64	137.866		2	64	223.339
2	65	159.415		2	65	198.37		2	65	226.17		2	65	257.318
2	66	126.086		2	66	194.856		2	66	223.1		2	66	301.937
2	67	137.148		2	67	161.482		2	67	190.334		2	67	231.783
2	68	130.797		2	68	197.035		2	68	180.537		2	68	250.821
2	69	166.997		2	69	196.795		2	69	228.337		2	69	149.891
2	70	126.407		2	70	186.046		2	70	237.183		2	70	214.527
2	71	160.816		2	71	187.428		2	71	223.021		2	71	261.241
2	72	161.465		2	72	186.758		2	72	227.526		2	72	252.1
2	73	158.656		2	73	182.855		2	73	219.117		2	73	261.901
2	74	156.347		2	74	190.498		2	74	215.484		2	74	239.756
2	75	150.491		2	75	148.759		2	75	228.408		2	75	262.315
2	76	131.797		2	76	183.04		2	76	181.722		2	76	267.403
2	77	163.301		2	77	188.369		2	77	154.246		2	77	277.872
2	78	156.561		2	78	158.172		2	78	218.86		2	78	218.726
2	79	159.259		2	79	162.713		2	79	194.648		2	79	251.656
2	80	175.388		2	80	202.392		2	80	221.095		2	80	245.245
2	81	154.524		2	81	197		2	81	210.081		2	81	202.969
2	82	136.828		2	82	192.198		2	82	225.923		2	82	207.38
2	83	164.805		2	83	187.044		2	83	219.846		2	83	250.344
2	84	131.273		2	84	194.886		2	84	219.536		2	84	193.481
2	85	139.3		2	85	149.188		2	85	149.783		2	85	260.927
2	86	150.908		2	86	168.663		2	86	183.705		2	86	264.278
2	87	163.12		2	87	194.843		2	87	222.333		2	87	213.753
2	88	159.884		2	88	140.089		2	88	219.752		2	88	246.607
2	89	162.222		2	89	194.434		2	89	234.743		2	89	250.86
2	90	162.502		2	90	192.133		2	90	231.715		2	90	239.165
2	91	164.515		2	91	163.284		2	91	166.442		2	91	161.463
2	92	152.308		2	92	193.306		2	92	222.668		2	92	214.575
2	93	164.897		2	93	167.599		2	93	226.412		2	93	256.566
2	94	159.385		2	94	189.799		2	94	184.536		2	94	260.486
2	95	146.4		2	95	187.484		2	95	214.431		2	95	237.79
2	96	156.676		2	96	197.244		2	96	157.212		2	96	207.382
2	97	163.476		2	97	189.339		2	97	227.535		2	97	157.671
2	98	160.317		2	98	195.677		2	98	234.866		2	98	239.779
2	99	153.387		2	99	203.457		2	99	145.492		2	99	234.142
2	100	157.998		2	100	201.048		2	100	193.282		2	100	157.232
2	101	161.596		2	101	203.431		2	101	156.43		2	101	243.879
2	102	156.622		2	102	188.019		2	102	223.732		2	102	244.213
2	103	158.611		2	103	186.167		2	103	250.221		2	103	152.643
2	104	157.42		2	104	189.289		2	104	218.3		2	104	175.457
2	105	166.143		2	105	159.543		2	105	186.626		2	105	201.734
2	106	158.312		2	106	167.282		2	106	184.033		2	106	256.881
2	107	162		2	107	190.595		2	107	237.884		2	107	257.54
2	108	163.299		2	108	192.227		2	108	217.476		2	108	143.329
2	109	166.586		2	109	197.494		2	109	181.481		2	109	248.852
2	110	163.032		2	110	198.95		2	110	147.926		2	110	260.555
2	111	164.064		2	111	147.392		2	111	257.439		2	111	191.055
2	112	165.662		2	112	194.805		2	112	241.327		2	112	239.864
2	113	158.141		2	113	142.405		2	113	180.82		2	113	191.911
2	114	154.482		2	114	189.032		2	114	230.383		2	114	207.057
2	115	156.68		2	115	196.275		2	115	215.163		2	115	247.549
2	116	147.37		2	116	191.598		2	116	222.064		2	116	224.824
2	117	125.535		2	117	187.981		2	117	172.936		2	117	169.162
2	118	157.615		2	118	198.488		2	118	212.438		2	118	243.303
2	119	161.883		2	119	196.39		2	119	165.444		2	119	203.436
2	120	114.019		2	120	191.668		2	120	229.919		2	120	257.02
2	121	161.338		2	121	198.155		2	121	223.009		2	121	253.261
2	122	158.956		2	122	184.729		2	122	209.175		2	122	238.138
2	123	164.592		2	123	199.113		2	123	227.291		2	123	221.375
2	124	164.727		2	124	198.388		2	124	223.646		2	124	250.875
2	125	150.301		2	125	196.412		2	125	234.112		2	125	247.29
2	126	160.624		2	126	198.141		2	126	219.357		2	126	241.79
2	127	127.11		2	127	191.616		2	127	234.134		2	127	212.338
2	128	154.501		2	128	184.286		2	128	214.522		2	128	238.499
2	129	161.328		2	129	193.784		2	129	232.778		2	129	190.012
2	130	167.472		2	130	191.051		2	130	155.356		2	130	243.986
2	131	163.232		2	131	195.868		2	131	208.129		2	131	195.521
2	132	164.423		2	132	187.609		2	132	193.952		2	132	222.933
2	133	169.285		2	133	194.747		2	133	232.354		2	133	253.594
2	134	166.657		2	134	190.944		2	134	275.63		2	134	240.39
2	135	162.244		2	135	195.289		2	135	211.142		2	135	271.058
2	136	161.076		2	136	168.291		2	136	227.694		2	136	257.067
2	137	155.691		2	137	200.474		2	137	234.738		2	137	243.307
2	138	129.691		2	138	184.84		2	138	174.774		2	138	239.696
2	139	135.261		2	139	163.243		2	139	170.146		2	139	247.554
2	140	139.58		2	140	185.964		2	140	223.471		2	140	253.267
2	141	194.388		2	141	159.113		2	141	166.455		2	141	244.215
2	142	161.232		2	142	200.621		2	142	157.444		2	142	242.205
2	143	162.047		2	143	191.601		2	143	223.981		2	143	228.773
2	144	164.069		2	144	184.224		2	144	152.296		2	144	172.904
2	145	159.838		2	145	193.392		2	145	216.765		2	145	233.34
2	146	128.495		2	146	197.408		2	146	194.824		2	146	212.146
2	147	164.199		2	147	185.988		2	147	223.915		2	147	254.45
2	148	163.631		2	148	193.896		2	148	235.828		2	148	247.632
2	149	162.396		2	149	196.439		2	149	223.058		2	149	181.212
2	150	163.09		2	150	145.389		2	150	211.4		2	150	235.538
2	151	157.869		2	151	190.278		2	151	224.777		2	151	246.619
2	152	113.328		2	152	187.637		2	152	159.422		2	152	218.301
2	153	126.406		2	153	197.957		2	153	224.484		2	153	240.589
2	154	152.213		2	154	163.065		2	154	227.465		2	154	192.825
2	155	160.975		2	155	196.48		2	155	180.274		2	155	240.558
2	156	160.89		2	156	202.037		2	156	209.58		2	156	305.289
2	157	135.189		2	157	200.178		2	157	164		2	157	258.887
2	158	168.855		2	158	146.959		2	158	225.562		2	158	270.013
2	159	151.692		2	159	137.28		2	159	221.083		2	159	247.668
2	160	168.136		2	160	150.318		2	160	219.555		2	160	225.041
2	161	157.473		2	161	191.479		2	161	238.183		2	161	180.943
2	162	165.005		2	162	176.276		2	162	177.056		2	162	229.677
2	163	166.144		2	163	186.395		2	163	224.057		2	163	278.209
2	164	157.48		2	164	195.977		2	164	122.975		2	164	217.819
2	165	155.36		2	165	181.295		2	165	155.78		2	165	260.919
2	166	170.559		2	166	189.622		2	166	234.142		2	166	236.552
2	167	156.247		2	167	145.483		2	167	178.07		2	167	250.766
2	168	156.894		2	168	194.584		2	168	184.482		2	168	152.251
2	169	123.074		2	169	194.791		2	169	228.672		2	169	281.774
2	170	126.698		2	170	171.284		2	170	227.826		2	170	228.63
2	171	162.873		2	171	197.255		2	171	196.974		2	171	259.606
2	172	163.162		2	172	189.946		2	172	179.614		2	172	217.23
2	173	138.428		2	173	147.461		2	173	205.816		2	173	156.616
2	174	163.455		2	174	197.756		2	174	157.868		2	174	263.942
2	175	163.597		2	175	188.748		2	175	215.427		2	175	254.145
2	176	159.124		2	176	196.161		2	176	226.759		2	176	198.981
2	177	159.445		2	177	188.686		2	177	213.351		2	177	241.801
2	178	126.362		2	178	194.11		2	178	219.574		2	178	229.159
2	179	170.324		2	179	189.247		2	179	211.65		2	179	230.907
2	180	163.772		2	180	194.883		2	180	233.892		2	180	246.253
2	181	161.443		2	181	195.296		2	181	224.925		2	181	266.607
2	182	125.781		2	182	193.706		2	182	233.726		2	182	254.768
2	183	159.661		2	183	190.633		2	183	213.498		2	183	247.03
2	184	152.54		2	184	146.247		2	184	217.968		2	184	205.982
2	185	158.378		2	185	142.802		2	185	233.69		2	185	245.708
2	186	158.872		2	186	191.829		2	186	162.035		2	186	187.646
2	187	166.617		2	187	204.259		2	187	147.803		2	187	233.668
2	188	157.7		2	188	192.868		2	188	219.046		2	188	243.837
2	189	162.961		2	189	189.152		2	189	232.272		2	189	254.214
2	190	160.916		2	190	151.865		2	190	130.409		2	190	240.604
2	191	133.058		2	191	196.084		2	191	244.957		2	191	212.496
2	192	130.721		2	192	196.968		2	192	226.401		2	192	240.058
2	193	158.463		2	193	197.054		2	193	151.15		2	193	246.555
2	194	162.261		2	194	203.636		2	194	232.482		2	194	205.017
2	195	160.433		2	195	133.426		2	195	230.667		2	195	267.515
2	196	159.176		2	196	195.575		2	196	212.799		2	196	205.52
2	197	159.829		2	197	186.168		2	197	210.174		2	197	258.749
2	198	118.188		2	198	190.048		2	198	228.045		2	198	233.917
2	199	154.775		2	199	151.184		2	199	230.275		2	199	252.398
2	200	166.621		2	200	209.967		2	200	234.374		2	200	202.353
2	201	125.436		2	201	201.665		2	201	223.946		2	201	259.726
2	202	162.854		2	202	191.847		2	202	193.167		2	202	168.259
2	203	160.014		2	203	194.419		2	203	158.436		2	203	216.986
2	204	152.137		2	204	201.96		2	204	249.798		2	204	277.334
2	205	166.58		2	205	180.569		2	205	135.603		2	205	215.209
2	206	164.289		2	206	190.747		2	206	222.969		2	206	253.309
2	207	154.137		2	207	179.11		2	207	221.338		2	207	221.284
2	208	168.506		2	208	198.623		2	208	205.092		2	208	217.818
2	209	170.868		2	209	203.353		2	209	236.439		2	209	259.897
2	210	158.615		2	210	164.103		2	210	220.945		2	210	231.622
2	211	157.972		2	211	189.599		2	211	232.167		2	211	215.487
2	212	159.327		2	212	203.248		2	212	236.951		2	212	255.986
2	213	156.801		2	213	188.374		2	213	231.741		2	213	229.844
2	214	157.404		2	214	191.765		2	214	208.266		2	214	150.049
2	215	160.261		2	215	183.722		2	215	238.03		2	215	253.495
2	216	155.402		2	216	182.357		2	216	229.84		2	216	253.068
2	217	161.711		2	217	184.801		2	217	231.921		2	217	256.426
2	218	123.839		2	218	189.378		2	218	226.749		2	218	232.887
2	219	152.029		2	219	183.171		2	219	222.426		2	219	250.086
2	220	151.399		2	220	192.418		2	220	208.392		2	220	247.143
2	221	138.553		2	221	186.291		2	221	224.777		2	221	243.918
2	222	158.886		2	222	181.568		2	222	217.751		2	222	252.983
2	223	162.276		2	223	173.397		2	223	213.324		2	223	172.66
2	224	146.106		2	224	196.956		2	224	154.82		2	224	260.408
2	225	147.887		2	225	191.323		2	225	223.529		2	225	184.508
2	226	159.354		2	226	203.746		2	226	199.7		2	226	230.867
2	227	159.614		2	227	129.978		2	227	172.393		2	227	184.971
2	228	161.772		2	228	195.211		2	228	201.375		2	228	261.947
2	229	161.752		2	229	188.949		2	229	171.268		2	229	255.855
2	230	152.988		2	230	164.401		2	230	206.057		2	230	249.83
2	231	111.914		2	231	207.624		2	231	228.509		2	231	242.157
2	232	162.494		2	232	188.415		2	232	219.582		2	232	266.75
2	233	127.002		2	233	179.888		2	233	176.778		2	233	246.151
2	234	128.493		2	234	194.645		2	234	207.815		2	234	258.364
2	235	165.366		2	235	158.803		2	235	239.449		2	235	234.359
2	236	158.33		2	236	154.382		2	236	210.979		2	236	153.986
2	237	133.775		2	237	202.348		2	237	222.682		2	237	256.474
2	238	136.838		2	238	192.27		2	238	198.342		2	238	169.591
2	239	162.548		2	239	196.502		2	239	246.698		2	239	253.812
2	240	165.399		2	240	195.894		2	240	213.725		2	240	259.632
2	241	155.73		2	241	183.913		2	241	229.416		2	241	238.592
2	242	159.511		2	242	179.741		2	242	209.164		2	242	206.416
2	243	159.273		2	243	161.42		2	243	225.283		2	243	243.886
2	244	159.265		2	244	194.842		2	244	150.974		2	244	202.933
2	245	146.152		2	245	199.638		2	245	147.444		2	245	242.898
2	246	158.929		2	246	179.438		2	246	187.348		2	246	243.981
2	247	162.833		2	247	203.362		2	247	152.592		2	247	236.969
2	248	158.707		2	248	189.745		2	248	229.33		2	248	192.702
2	249	158.791		2	249	156.778		2	249	139.349		2	249	261.753
2	250	163.143		2	250	192.032		2	250	164.691		2	250	243.961
2	251	158.013		2	251	194.376		2	251	137.269		2	251	253.288
2	252	158.381		2	252	194.787		2	252	186.444		2	252	268.172
2	253	162.451		2	253	186.698		2	253	164.295		2	253	246.126
2	254	161.84		2	254	217.879		2	254	213.371		2	254	246.98
2	255	162.554		2	255	164.862		2	255	167.188		2	255	177.581
2	256	154.102		2	256	196.467		2	256	222.108		2	256	254.456
2	257	160.779		2	257	194.286		2	257	247.506		2	257	253.879
2	258	163.989		2	258	196.464		2	258	161.771		2	258	201.225
2	259	161.839		2	259	194.479		2	259	251.784		2	259	269.319
2	260	145.676		2	260	200.935		2	260	139.67		2	260	240.672
2	261	159.257		2	261	189.419		2	261	217.132		2	261	192.723
2	262	178.169		2	262	166.942		2	262	152.298		2	262	248.619
2	263	154.053		2	263	187.982		2	263	219.402		2	263	222.123
2	264	163.148		2	264	185.157		2	264	224.439		2	264	252.93
2	265	157.326		2	265	153.533		2	265	234.254		2	265	170.597
2	266	127.059		2	266	196.271		2	266	213.594		2	266	240.796
2	267	163.042		2	267	183.816		2	267	232.833		2	267	230.461
2	268	168.182		2	268	194.225		2	268	198.788		2	268	226.588
2	269	165.356		2	269	205.621		2	269	168.491		2	269	186.033
2	270	168.831		2	270	190.753		2	270	152.042		2	270	251.913
2	271	156.205		2	271	188.386		2	271	161.831		2	271	189.477
2	272	155.071		2	272	196.989		2	272	231.191		2	272	145.381
2	273	155.657		2	273	200.781		2	273	217.178		2	273	192.079
2	274	157.902		2	274	193.171		2	274	235.741		2	274	211.349
2	275	168.481		2	275	176.787		2	275	161.033		2	275	269.418
2	276	164.5		2	276	192.628		2	276	158.899		2	276	173.108
2	277	140.175		2	277	181.001		2	277	221.054		2	277	247.832
2	278	142.616		2	278	156.697		2	278	229.224		2	278	237.139
2	279	163.193		2	279	187.083		2	279	127.396		2	279	252.674
2	280	170.839		2	280	192.74		2	280	170.033		2	280	252.562
2	281	139.99		2	281	194.905		2	281	212.919		2	281	242.219
2	282	165.796		2	282	190.673		2	282	220.8		2	282	194.545
2	283	162.9		2	283	207.792		2	283	227.878		2	283	245.247
2	284	168.201		2	284	161.593		2	284	166.96		2	284	252.607
2	285	164.807		2	285	194.735		2	285	171.25		2	285	246.328
2	286	162.133		2	286	190.333		2	286	222.696		2	286	283.76
2	287	163.875		2	287	188.389		2	287	234.254		2	287	182.194
2	288	161.912		2	288	192.526		2	288	225.407		2	288	247.819
2	289	157.036		2	289	181.765		2	289	244.414		2	289	250.047
2	290	164.924		2	290	204.283		2	290	167.587		2	290	263.788
2	291	150.654		2	291	201.437		2	291	234.093		2	291	253.987
2	292	155.256		2	292	208.725		2	292	238.645		2	292	237.107
2	293	164.186		2	293	203.815		2	293	232.41		2	293	275.45
2	294	136.221		2	294	189.797		2	294	194.322		2	294	258.981
2	295	165.601		2	295	190.134		2	295	231.66		2	295	212.365
2	296	161.623		2	296	190.769		2	296	223.047		2	296	172.914
2	297	161.288		2	297	201.391		2	297	215.352		2	297	182.967
2	298	156.828		2	298	189.864		2	298	214.262		2	298	266.495
2	299	168.135		2	299	202.743		2	299	228.222		2	299	178.122
3	0	158.876		3	0	194.013		3	0	217.49		3	0	234.673
3	1	157.085		3	1	196.133		3	1	181.85		3	1	243.293
3	2	163.551		3	2	201.096		3	2	239.047		3	2	250.644
3	3	157.309		3	3	151.282		3	3	141.911		3	3	162.702
3	4	158.546		3	4	163.793		3	4	196.359		3	4	247.741
3	5	180.507		3	5	191.919		3	5	227.334		3	5	165.426
3	6	171.856		3	6	195.729		3	6	227.232		3	6	165.991
3	7	170.299		3	7	151.486		3	7	225.247		3	7	239.441
3	8	159.492		3	8	194.121		3	8	230.541		3	8	244.873
3	9	158.45		3	9	187.914		3	9	233.451		3	9	249.376
3	10	158.439		3	10	189.709		3	10	233.059		3	10	257.051
3	11	160.831		3	11	199.045		3	11	220.45		3	11	208.87
3	12	165.154		3	12	184.075		3	12	242.035		3	12	230.057
3	13	160.953		3	13	172.921		3	13	225.025		3	13	257.192
3	14	161.241		3	14	202.339		3	14	224.289		3	14	256.058
3	15	157.142		3	15	182.412		3	15	231.739		3	15	191.813
3	16	157.8		3	16	183.165		3	16	150.929		3	16	246.203
3	17	161.079		3	17	195.637		3	17	222.213		3	17	235.89
3	18	167.132		3	18	201.811		3	18	227.914		3	18	242.815
3	19	164.249		3	19	191.541		3	19	228.852		3	19	252.154
3	20	164.868		3	20	185.5		3	20	219.545		3	20	250.669
3	21	166.531		3	21	192.071		3	21	229.917		3	21	255.12
3	22	150.247		3	22	193.414		3	22	229.861		3	22	234.55
3	23	168.05		3	23	197.644		3	23	268.979		3	23	254.681
3	24	161.659		3	24	196.624		3	24	213.762		3	24	238.336
3	25	166.515		3	25	191.435		3	25	213.088		3	25	243.267
3	26	165.375		3	26	200.41		3	26	224.881		3	26	261.543
3	27	160.786		3	27	187.531		3	27	160.38		3	27	240.109
3	28	131.202		3	28	190.798		3	28	226.044		3	28	253.233
3	29	124.369		3	29	132.366		3	29	219.037		3	29	241.384
3	30	170.952		3	30	195.985		3	30	222.661		3	30	240.163
3	31	166.134		3	31	139.071		3	31	213.441		3	31	225.536
3	32	164.937		3	32	186.01		3	32	205.1		3	32	246.787
3	33	159.657		3	33	195.774		3	33	225.517		3	33	243.404
3	34	158.495		3	34	187.615		3	34	211.667		3	34	245.562
3	35	162.215		3	35	191.209		3	35	214.446		3	35	249.911
3	36	158.337		3	36	192.238		3	36	231.699		3	36	234.329
3	37	165.807		3	37	202.967		3	37	247.451		3	37	243.075
3	38	167.821		3	38	134.391		3	38	221.913		3	38	227.846
3	39	155.773		3	39	198.123		3	39	213.207		3	39	240.579
3	40	161.997		3	40	194.937		3	40	231.165		3	40	246.005
3	41	158.379		3	41	207.05		3	41	236.225		3	41	209.537
3	42	161.591		3	42	134.893		3	42	226.425		3	42	257.9
3	43	160.49		3	43	197.282		3	43	213.714		3	43	251.812
3	44	162.616		3	44	201.193		3	44	193.501		3	44	241.82
3	45	158.482		3	45	194.759		3	45	214.082		3	45	254.448
3	46	160.249		3	46	197.685		3	46	227.118		3	46	255.74
3	47	155.159		3	47	173.918		3	47	215.24		3	47	236.634
3	48	161.652		3	48	190.149		3	48	146.289		3	48	256.488
3	49	157.572		3	49	194.71		3	49	243.981		3	49	245.79
3	50	159.758		3	50	182.253		3	50	224.812		3	50	243.516
3	51	155.146		3	51	195.34		3	51	218.757		3	51	238.054
3	52	176.9		3	52	190.357		3	52	223.01		3	52	246.013
3	53	153.366		3	53	183.957		3	53	200.551		3	53	251.833
3	54	160.726		3	54	186.634		3	54	231.633		3	54	242.76
3	55	163.764		3	55	192.035		3	55	225.2		3	55	248.276
3	56	159.428		3	56	194.787		3	56	177.955		3	56	152.16
3	57	154.058		3	57	196.389		3	57	221.341		3	57	258.906
3	58	168.485		3	58	196.107		3	58	231.121		3	58	263.25
3	59	164.365		3	59	190.846		3	59	235.037		3	59	256.868
3	60	163.943		3	60	189.603		3	60	179.674		3	60	229.841
3	61	163.374		3	61	191.223		3	61	227.413		3	61	251.259
3	62	159.698		3	62	189.242		3	62	230.21		3	62	244.762
3	63	163.936		3	63	196.295		3	63	191.401		3	63	239.04
3	64	158.85		3	64	195.335		3	64	229.715		3	64	250.545
3	65	160.415		3	65	200.168		3	65	149.798		3	65	252.213
3	66	160.559		3	66	187.957		3	66	239.762		3	66	247.602
3	67	156.504		3	67	159.987		3	67	222.885		3	67	247.244
3	68	161.877		3	68	149.951		3	68	225.277		3	68	255.705
3	69	165.11		3	69	189.837		3	69	227.975		3	69	244.127
3	70	158.436		3	70	149.667		3	70	220.132		3	70	246.879
3	71	160.328		3	71	204.323		3	71	222.823		3	71	225.159
3	72	157.677		3	72	188.219		3	72	231.282		3	72	251.662
3	73	159.317		3	73	191.783		3	73	226.914		3	73	271.311
3	74	152.688		3	74	148.342		3	74	140.329		3	74	239.701
3	75	154.047		3	75	191.945		3	75	211.798		3	75	241.232
3	76	162.678		3	76	197.229		3	76	155.852		3	76	256.692
3	77	163.053		3	77	185.974		3	77	227.147		3	77	246.06
3	78	161.781		3	78	188.063		3	78	192.811		3	78	248.271
3	79	155.668		3	79	195.372		3	79	236.157		3	79	246.626
3	80	160.476		3	80	200.016		3	80	208.163		3	80	254.814
3	81	142.569		3	81	190.628		3	81	221.538		3	81	257.115
3	82	165.846		3	82	197.004		3	82	233.507		3	82	212.236
3	83	160.263		3	83	194.41		3	83	222.1		3	83	232.259
3	84	158.04		3	84	198.601		3	84	227.389		3	84	235.477
3	85	157.032		3	85	188.609		3	85	233.477		3	85	274.082
3	86	161.903		3	86	138.509		3	86	230.746		3	86	224.586
3	87	160.59		3	87	190.822		3	87	218.148		3	87	217.283
3	88	162.078		3	88	191.757		3	88	228.703		3	88	245.202
3	89	164.156		3	89	194.351		3	89	226.444		3	89	246.21
3	90	163.992		3	90	187.388		3	90	222.95		3	90	215.087
3	91	159.56		3	91	188.28		3	91	231.064		3	91	263.999
3	92	164.797		3	92	138.298		3	92	224.961		3	92	176.737
3	93	166.08		3	93	143.09		3	93	205.443		3	93	242.603
3	94	154.176		3	94	192.771		3	94	229.794		3	94	262.785
3	95	158.681		3	95	186.462		3	95	225.224		3	95	198.477
3	96	159.79		3	96	139.01		3	96	231.683		3	96	258.263
3	97	165.695		3	97	160.337		3	97	226.557		3	97	249.937
3	98	160.333		3	98	190.73		3	98	222.706		3	98	239.791
3	99	160.598		3	99	167.604		3	99	222.751		3	99	253.247
3	100	121.11		3	100	192.433		3	100	220.183		3	100	252.974
3	101	155.479		3	101	199.809		3	101	183.741		3	101	239.824
3	102	166.895		3	102	199.258		3	102	160.888		3	102	247.337
3	103	161.289		3	103	155.084		3	103	222.734		3	103	232.733
3	104	132.836		3	104	193.715		3	104	204.648		3	104	243.306
3	105	163.729		3	105	203.784		3	105	221.821		3	105	156.721
3	106	163.22		3	106	195.721		3	106	230.23		3	106	236.254
3	107	161.988		3	107	193.014		3	107	209.93		3	107	252.327
3	108	158.819		3	108	198.545		3	108	230.233		3	108	260.282
3	109	162.845		3	109	182.353		3	109	228.096		3	109	236.194
3	110	162.374		3	110	196.288		3	110	234.985		3	110	239.722
3	111	164.834		3	111	183.695		3	111	241.858		3	111	241.876
3	112	160.646		3	112	188.66		3	112	220.977		3	112	249.746
3	113	160.805		3	113	177.543		3	113	218.997		3	113	252.715
3	114	163.067		3	114	195.664		3	114	157.222		3	114	211.447
3	115	152.566		3	115	166.65		3	115	178.49		3	115	190.735
3	116	142.691		3	116	187.068		3	116	226.875		3	116	236.017
3	117	164.558		3	117	190.033		3	117	206.396		3	117	235.856
3	118	157.382		3	118	192.611		3	118	193.63		3	118	256.046
3	119	170.084		3	119	190.94		3	119	208.17		3	119	250.29
3	120	164.931		3	120	185.125		3	120	171.018		3	120	270.17
3	121	157.279		3	121	198.332		3	121	217.89		3	121	241.08
3	122	158.795		3	122	156.512		3	122	223.718		3	122	177.892
3	123	157.851		3	123	200.547		3	123	232.655		3	123	255.568
3	124	154.911		3	124	198.946		3	124	215.733		3	124	203.717
3	125	159.35		3	125	133.808		3	125	212.812		3	125	239.334
3	126	159.456		3	126	193.033		3	126	226.081		3	126	269.993
3	127	164.513		3	127	187.222		3	127	145.964		3	127	243.487
3	128	158.293		3	128	188.816		3	128	221.389		3	128	242.342
3	129	161.108		3	129	196.221		3	129	178.912		3	129	236.98
3	130	165.119		3	130	164.389		3	130	220.28		3	130	242.173
3	131	128.212		3	131	206.253		3	131	224.903		3	131	247.254
3	132	161.869		3	132	195.224		3	132	226.102		3	132	245.628
3	133	155.311		3	133	204.622		3	133	225.849		3	133	255.113
3	134	165.309		3	134	193.271		3	134	229.5		3	134	245.253
3	135	161.24		3	135	152.41		3	135	133.438		3	135	182.832
3	136	158.718		3	136	194.789		3	136	228.853		3	136	251.757
3	137	161.159		3	137	198.815		3	137	217.683		3	137	245.791
3	138	154.119		3	138	181.268		3	138	226.678		3	138	251.148
3	139	129.683		3	139	201.531		3	139	221.896		3	139	259.532
3	140	148.159		3	140	191.885		3	140	199.805		3	140	259.351
3	141	162.181		3	141	195.221		3	141	223.272		3	141	262.709
3	142	164.02		3	142	191.977		3	142	227.511		3	142	239.404
3	143	163.654		3	143	141.195		3	143	228.72		3	143	244.24
3	144	125.077		3	144	199.448		3	144	222.819		3	144	223.863
3	145	155.58		3	145	198.725		3	145	213.683		3	145	256.924
3	146	128.465		3	146	199.118		3	146	177.146		3	146	243.337
3	147	138.786		3	147	202.809		3	147	229.522		3	147	243.66
3	148	154.131		3	148	184.795		3	148	143.191		3	148	233.36
3	149	160.593		3	149	195.381		3	149	217.528		3	149	256.469
3	150	156.481		3	150	198.077		3	150	198.983		3	150	236.696
3	151	162.394		3	151	188.974		3	151	236.84		3	151	241.044
3	152	161.858		3	152	151.334		3	152	233.715		3	152	253.154
3	153	157.851		3	153	198.8		3	153	170.183		3	153	256.198
3	154	162.479		3	154	192.19		3	154	205.753		3	154	234.288
3	155	161.668		3	155	195.862		3	155	225.891		3	155	245.307
3	156	154.014		3	156	196.555		3	156	222.752		3	156	245.365
3	157	162.206		3	157	185.85		3	157	229.966		3	157	259.808
3	158	161.986		3	158	201.97		3	158	236.577		3	158	254.41
3	159	163.349		3	159	187.854		3	159	214.688		3	159	232.974
3	160	164.93		3	160	196.428		3	160	234.691		3	160	240.014
3	161	162.066		3	161	213.794		3	161	231.682		3	161	245.933
3	162	191.209		3	162	191.644		3	162	219.453		3	162	245.04
3	163	164.109		3	163	138.834		3	163	221.812		3	163	241.453
3	164	123.88		3	164	192.803		3	164	209.434		3	164	245.23
3	165	161.678		3	165	197.737		3	165	155.359		3	165	235.478
3	166	176.726		3	166	168.432		3	166	194.773		3	166	146.667
3	167	165.324		3	167	195.814		3	167	220.126		3	167	244.498
3	168	162.243		3	168	184.961		3	168	228.662		3	168	248.853
3	169	156.551		3	169	211.522		3	169	201.925		3	169	244.409
3	170	161.115		3	170	189.241		3	170	207.517		3	170	181.848
3	171	162.871		3	171	190.976		3	171	186.009		3	171	242.592
3	172	169.313		3	172	196.69		3	172	221.458		3	172	237.552
3	173	168.141		3	173	168.579		3	173	209.227		3	173	241.658
3	174	160.112		3	174	192.706		3	174	186.7		3	174	228.297
3	175	152.247		3	175	200.41		3	175	223.741		3	175	239.263
3	176	158.374		3	176	193.448		3	176	216.04		3	176	237.831
3	177	160.333		3	177	187.386		3	177	218.781		3	177	249.711
3	178	159.937		3	178	153.249		3	178	226.691		3	178	244.632
3	179	160.615		3	179	196.786		3	179	226.18		3	179	246.827
3	180	164.896		3	180	192.839		3	180	208.801		3	180	238.204
3	181	158.565		3	181	185.623		3	181	210.09		3	181	220.513
3	182	157.992		3	182	187.472		3	182	161.607		3	182	223.772
3	183	144.867		3	183	194.76		3	183	220.968		3	183	256.053
3	184	166.888		3	184	166.483		3	184	228.482		3	184	239.652
3	185	156.888		3	185	177.289		3	185	196.51		3	185	251.714
3	186	135.697		3	186	206.301		3	186	231.809		3	186	257.901
3	187	160.865		3	187	185.983		3	187	226.222		3	187	249.025
3	188	165.767		3	188	193.017		3	188	151.513		3	188	254.309
3	189	160.092		3	189	197.087		3	189	202.477		3	189	196.932
3	190	166.675		3	190	181.04		3	190	209.8		3	190	237.151
3	191	168.371		3	191	185.859		3	191	206.135		3	191	251.255
3	192	160.244		3	192	193.021		3	192	224.724		3	192	246.982
3	193	158.552		3	193	166.745		3	193	220.797		3	193	250.051
3	194	159.134		3	194	191.204		3	194	245.365		3	194	162.247
3	195	165.077		3	195	164.76		3	195	216.498		3	195	258.144
3	196	156.36		3	196	186.297		3	196	228.884		3	196	261.659
3	197	159.743		3	197	187.424		3	197	225.796		3	197	258.577
3	198	154.523		3	198	211.258		3	198	217.091		3	198	251.081
3	199	158.407		3	199	137.371		3	199	220.453		3	199	246.147
3	200	159.152		3	200	140.558		3	200	138.419		3	200	258.397
3	201	155.791		3	201	197.717		3	201	210.942		3	201	174.792
3	202	130.146		3	202	170.184		3	202	227.844		3	202	246.054
3	203	159.138		3	203	116.102		3	203	225.155		3	203	245.532
3	204	160.528		3	204	185.787		3	204	225.297		3	204	174.266
3	205	161.824		3	205	198.115		3	205	137.502		3	205	247.237
3	206	159.107		3	206	189.85		3	206	215.242		3	206	242.612
3	207	152.906		3	207	193.857		3	207	230.869		3	207	254.956
3	208	160.923		3	208	184.896		3	208	229.249		3	208	256.825
3	209	157.995		3	209	197.491		3	209	180.814		3	209	257.681
3	210	163.215		3	210	198.438		3	210	216.186		3	210	234.177
3	211	153.235		3	211	192.191		3	211	223.442		3	211	227.803
3	212	138.932		3	212	190.503		3	212	223.614		3	212	190.624
3	213	157.366		3	213	189.906		3	213	143.354		3	213	249.781
3	214	162.236		3	214	194.763		3	214	236.814		3	214	271.076
3	215	165.277		3	215	177.106		3	215	153.955		3	215	247.395
3	216	163.33		3	216	191.167		3	216	218.644		3	216	242.716
3	217	156.813		3	217	208.625		3	217	222.941		3	217	254.86
3	218	159.324		3	218	181.078		3	218	229.516		3	218	229.516
3	219	153.623		3	219	197.931		3	219	223.038		3	219	253.338
3	220	160.217		3	220	181.873		3	220	203.998		3	220	243.656
3	221	163.894		3	221	199.57		3	221	237.645		3	221	178.687
3	222	128.332		3	222	164.569		3	222	218.971		3	222	178.068
3	223	163.673		3	223	164.37		3	223	167.595		3	223	162.009
3	224	161.339		3	224	189.9		3	224	230.378		3	224	234.59
3	225	151.39		3	225	202.485		3	225	228.881		3	225	156.974
3	226	154.481		3	226	163.949		3	226	193.323		3	226	205.015
3	227	160.81		3	227	198.802		3	227	219.59		3	227	239.003
3	228	115.089		3	228	189.18		3	228	225.125		3	228	262.7
3	229	162.052		3	229	199.132		3	229	146.122		3	229	239.013
3	230	164.543		3	230	189.43		3	230	216.45		3	230	253.027
3	231	157.014		3	231	148.223		3	231	151.692		3	231	256.928
3	232	161.151		3	232	187.034		3	232	161.557		3	232	245.225
3	233	155.65		3	233	170.532		3	233	221.504		3	233	257.094
3	234	163.269		3	234	175.098		3	234	142.971		3	234	246.697
3	235	159.035		3	235	195.577		3	235	236.109		3	235	235.082
3	236	165.59		3	236	192.575		3	236	175.931		3	236	262.216
3	237	160.754		3	237	193.63		3	237	226.446		3	237	194.955
3	238	141.58		3	238	197.095		3	238	212.437		3	238	268.749
3	239	161.766		3	239	178.938		3	239	173.303		3	239	248.819
3	240	119.365		3	240	197.416		3	240	240.556		3	240	254.738
3	241	161.259		3	241	189.396		3	241	218.361		3	241	241.841
3	242	153.554		3	242	197.397		3	242	220.349		3	242	247.405
3	243	159.086		3	243	188.748		3	243	222.02		3	243	250.275
3	244	161.774		3	244	155.954		3	244	231.592		3	244	247.694
3	245	166.781		3	245	189.983		3	245	225.493		3	245	234.903
3	246	130.014		3	246	188.295		3	246	217.814		3	246	245.086
3	247	160.874		3	247	199.145		3	247	183.76		3	247	201.335
3	248	166.219		3	248	187.442		3	248	196.611		3	248	237.886
3	249	161.013		3	249	189.57		3	249	230.543		3	249	244.562
3	250	164.742		3	250	189.005		3	250	230.094		3	250	255.572
3	251	159.589		3	251	201.666		3	251	225.857		3	251	264.878
3	252	164.917		3	252	195.764		3	252	225.125		3	252	252.271
3	253	158.263		3	253	183.817		3	253	214.614		3	253	266.055
3	254	155.421		3	254	201.325		3	254	221.172		3	254	246.459
3	255	153.393		3	255	197.157		3	255	223.957		3	255	242.072
3	256	165.204		3	256	199.872		3	256	216.164		3	256	250.526
3	257	171.973		3	257	168.976		3	257	220.376		3	257	242.429
3	258	147.178		3	258	137.934		3	258	215.877		3	258	198.395
3	259	156.867		3	259	193.478		3	259	189.101		3	259	249.725
3	260	138.734		3	260	152.431		3	260	198.339		3	260	229.129
3	261	162.108		3	261	175.787		3	261	230.6		3	261	239.686
3	262	144.665		3	262	159.089		3	262	219.836		3	262	239.765
3	263	165.848		3	263	191.789		3	263	229.342		3	263	240.418
3	264	152.543		3	264	210.58		3	264	230.622		3	264	255.281
3	265	155.692		3	265	193.756		3	265	225.454		3	265	246.441
3	266	160.992		3	266	201.121		3	266	217.998		3	266	221.956
3	267	125.155		3	267	178.842		3	267	244.069		3	267	243.207
3	268	128.007		3	268	194.223		3	268	227.106		3	268	237.653
3	269	165.08		3	269	153.175		3	269	232.432		3	269	249.349
3	270	160.652		3	270	173.584		3	270	240.54		3	270	248.944
3	271	172.613		3	271	187.221		3	271	238.749		3	271	244.518
3	272	167.428		3	272	176.062		3	272	233.326		3	272	255.712
3	273	127.521		3	273	193.091		3	273	229.255		3	273	245.31
3	274	155.322		3	274	190.099		3	274	222.131		3	274	235.472
3	275	152.141		3	275	187.183		3	275	213.692		3	275	237.738
3	276	161.18		3	276	206.979		3	276	225.403		3	276	273.081
3	277	159.83		3	277	207.97		3	277	218.009		3	277	251.07
3	278	164.803		3	278	189.56		3	278	238.503		3	278	247.279
3	279	162.282		3	279	146.178		3	279	237.987		3	279	243.269
3	280	163.08		3	280	177.253		3	280	230.204		3	280	255.51
3	281	157.641		3	281	188.471		3	281	280.161		3	281	253.072
3	282	160.723		3	282	204.744		3	282	216.703		3	282	213.848
3	283	139.909		3	283	200.836		3	283	218.671		3	283	244.72
3	284	155.4		3	284	138.889		3	284	202.806		3	284	242.941
3	285	159.523		3	285	191.847		3	285	227.733		3	285	239.087
3	286	128.747		3	286	199.799		3	286	231.285		3	286	244.545
3	287	167.668		3	287	185.805		3	287	242.682		3	287	267.365
3	288	158.902		3	288	135.261		3	288	232.684		3	288	397.677
3	289	153.537		3	289	150.212		3	289	162.805		3	289	158.869
3	290	126.066		3	290	219.116		3	290	165.735		3	290	242.752
3	291	166.953		3	291	184.137		3	291	147.331		3	291	233.756
3	292	161.172		3	292	190.734		3	292	223.89		3	292	252.015
3	293	162.042		3	293	192.342		3	293	230.981		3	293	245.649
3	294	119.091		3	294	198.471		3	294	182.759		3	294	244.443
3	295	167.385		3	295	200.134		3	295	230.076		3	295	258.161
3	296	158.521		3	296	189.594		3	296	226.166		3	296	238.618
3	297	158.808		3	297	200.788		3	297	230.394		3	297	244.109
3	298	161.077		3	298	200.215		3	298	139.244		3	298	257.408
3	299	163.45		3	299	152.47		3	299	218.012		3	299	245.398
4	0	160.789		4	0	185.473		4	0	119.319		4	0	263.21
4	1	156.092		4	1	182.259		4	1	211.981		4	1	250.625
4	2	158.274		4	2	185.01		4	2	221.126		4	2	248.382
4	3	155.71		4	3	196.404		4	3	226.188		4	3	247.778
4	4	160.101		4	4	183.884		4	4	242.248		4	4	238.087
4	5	151.518		4	5	202.929		4	5	224.43		4	5	240.68
4	6	146.87		4	6	189.315		4	6	220.21		4	6	233.647
4	7	159.542		4	7	184.357		4	7	137.865		4	7	248.331
4	8	158.68		4	8	137.418		4	8	216.315		4	8	256.914
4	9	153.691		4	9	196.672		4	9	223.345		4	9	247.882
4	10	151.517		4	10	178.345		4	10	196.65		4	10	242.209
4	11	157.004		4	11	199.23		4	11	132.637		4	11	247.173
4	12	158.11		4	12	188.157		4	12	199.569		4	12	257.086
4	13	159.558		4	13	196.587		4	13	230.47		4	13	235.655
4	14	151		4	14	191.201		4	14	143.272		4	14	263.681
4	15	153.09		4	15	119.726		4	15	110.242		4	15	245.117
4	16	162.429		4	16	188.004		4	16	235.893		4	16	248.706
4	17	153.966		4	17	181.818		4	17	235.35		4	17	264.807
4	18	157.817		4	18	185.573		4	18	227.565		4	18	251.661
4	19	155.562		4	19	192.418		4	19	136.812		4	19	249.147
4	20	158.24		4	20	183.665		4	20	221.282		4	20	243.02
4	21	156.197		4	21	179.4		4	21	216.995		4	21	254.567
4	22	165.985		4	22	187.59		4	22	157.293		4	22	243.118
4	23	155.895		4	23	198.605		4	23	246.484		4	23	249.797
4	24	154.212		4	24	200.511		4	24	234.353		4	24	253.968
4	25	151.817		4	25	194.079		4	25	231.13		4	25	253.162
4	26	153.074		4	26	135.303		4	26	226.893		4	26	238.864
4	27	146.815		4	27	192.837		4	27	226.33		4	27	259.729
4	28	162.263		4	28	187.731		4	28	237.686		4	28	235.684
4	29	134.305		4	29	190.719		4	29	241.102		4	29	251.754
4	30	158.402		4	30	194.854		4	30	222.297		4	30	247.393
4	31	154.75		4	31	190.582		4	31	159.988		4	31	249.575
4	32	155.832		4	32	198.072		4	32	240.731		4	32	257.631
4	33	158.272		4	33	140.759		4	33	216.011		4	33	253.12
4	34	159.212		4	34	187.132		4	34	227.884		4	34	264.988
4	35	155.481		4	35	192.854		4	35	208.021		4	35	246.317
4	36	159.343		4	36	159.738		4	36	232.387		4	36	241.864
4	37	162.144		4	37	194.924		4	37	223.195		4	37	164.167
4	38	153.384		4	38	168.935		4	38	227.875		4	38	237.557
4	39	138.108		4	39	193.168		4	39	240.282		4	39	260.678
4	40	163.424		4	40	200.115		4	40	220.105		4	40	252.039
4	41	156.213		4	41	152.222		4	41	223.43		4	41	240.819
4	42	152.674		4	42	190.33		4	42	241.41		4	42	125.429
4	43	152.586		4	43	192.546		4	43	231.852		4	43	249.254
4	44	154.016		4	44	203.352		4	44	222.398		4	44	253.338
4	45	152.961		4	45	199.041		4	45	205.056		4	45	250.236
4	46	135.213		4	46	192.864		4	46	225.567		4	46	255.307
4	47	163.606		4	47	191.431		4	47	225.347		4	47	274.728
4	48	161.144		4	48	194.871		4	48	221.628		4	48	245.186
4	49	156.879		4	49	188.352		4	49	223.543		4	49	253.899
4	50	154.657		4	50	188.121		4	50	226.865		4	50	168.613
4	51	123.243		4	51	190.039		4	51	236.3		4	51	232.38
4	52	154.106		4	52	191.264		4	52	156.614		4	52	245.952
4	53	155.839		4	53	191.131		4	53	223.135		4	53	242.1
4	54	149.465		4	54	191.034		4	54	232.948		4	54	239.839
4	55	157.048		4	55	195.028		4	55	221.653		4	55	261.931
4	56	164.46		4	56	193.417		4	56	159.587		4	56	256.013
4	57	153.48		4	57	193.293		4	57	226.689		4	57	233.429
4	58	157.574		4	58	188.068		4	58	224.106		4	58	261.324
4	59	157.073		4	59	195.577		4	59	223.598		4	59	255.689
4	60	142.198		4	60	180.227		4	60	207.358		4	60	238.36
4	61	147.48		4	61	192.478		4	61	219.031		4	61	257.788
4	62	156.32		4	62	196.748		4	62	226.579		4	62	242.46
4	63	157.136		4	63	188.505		4	63	210.408		4	63	247.159
4	64	155.204		4	64	192.809		4	64	229.063		4	64	152.717
4	65	156.763		4	65	195.923		4	65	226.9		4	65	234.331
4	66	146.97		4	66	185.086		4	66	230.593		4	66	243.298
4	67	163.868		4	67	194.588		4	67	141.261		4	67	246.926
4	68	159.272		4	68	186.535		4	68	152.896		4	68	253.4
4	69	158.975		4	69	160.968		4	69	231.309		4	69	250.464
4	70	150.907		4	70	189.666		4	70	226.105		4	70	155.448
4	71	155.067		4	71	194.711		4	71	230.515		4	71	250.842
4	72	157.886		4	72	166.125		4	72	234.229		4	72	245.136
4	73	157.848		4	73	137.05		4	73	179.392		4	73	248.004
4	74	153.383		4	74	194.464		4	74	228.232		4	74	247.771
4	75	160.695		4	75	192.476		4	75	228.877		4	75	259.184
4	76	153.946		4	76	188.645		4	76	233.143		4	76	254.827
4	77	163.852		4	77	190.166		4	77	232.217		4	77	247.047
4	78	119.068		4	78	190.105		4	78	232.541		4	78	248.348
4	79	153.695		4	79	193.234		4	79	236		4	79	244.537
4	80	156.368		4	80	152.21		4	80	209.736		4	80	239.787
4	81	158.732		4	81	188.012		4	81	240.75		4	81	242.343
4	82	153.594		4	82	192.134		4	82	221.501		4	82	264.502
4	83	154.713		4	83	188.541		4	83	220.948		4	83	254.904
4	84	154.543		4	84	197.183		4	84	240.111		4	84	258.261
4	85	156.618		4	85	185.626		4	85	182.863		4	85	280.787
4	86	154.853		4	86	192.493		4	86	167.138		4	86	257.523
4	87	156.62		4	87	200.004		4	87	228.197		4	87	250.211
4	88	155.113		4	88	191.579		4	88	226.732		4	88	247.792
4	89	151.667		4	89	183.092		4	89	222.517		4	89	244.087
4	90	142.944		4	90	180.43		4	90	230.624		4	90	263.687
4	91	155.695		4	91	189.043		4	91	223.79		4	91	249.294
4	92	156.042		4	92	197.746		4	92	159.444		4	92	251.221
4	93	156.826		4	93	191.189		4	93	218.189		4	93	243.261
4	94	153.813		4	94	185.773		4	94	228.645		4	94	257.167
4	95	155.055		4	95	186.741		4	95	225.029		4	95	254.991
4	96	158.807		4	96	193.172		4	96	230.632		4	96	250.367
4	97	155.313		4	97	192.828		4	97	224.11		4	97	247.288
4	98	160.238		4	98	198.019		4	98	228.72		4	98	258.242
4	99	151.407		4	99	187.682		4	99	148.003		4	99	246.622
4	100	131.417		4	100	201.674		4	100	211.228		4	100	260.12
4	101	153.593		4	101	194.214		4	101	172.972		4	101	208.358
4	102	157.051		4	102	188.509		4	102	224.05		4	102	251.431
4	103	153.936		4	103	147.934		4	103	225.673		4	103	251.112
4	104	184.274		4	104	191.631		4	104	234.169		4	104	253.482
4	105	153.242		4	105	188.432		4	105	158.068		4	105	259.321
4	106	133.366		4	106	195.844		4	106	222.553		4	106	172.77
4	107	123.848		4	107	196.274		4	107	228.667		4	107	241.214
4	108	156.419		4	108	139.828		4	108	227.683		4	108	239.942
4	109	155.829		4	109	191.798		4	109	228.916		4	109	248.274
4	110	155.153		4	110	189.457		4	110	223.517		4	110	246.98
4	111	152.78		4	111	196.983		4	111	143.473		4	111	247.626
4	112	197.019		4	112	182.565		4	112	220.485		4	112	255.79
4	113	154.172		4	113	185.211		4	113	231.045		4	113	262.466
4	114	156.648		4	114	136.504		4	114	207.072		4	114	242.027
4	115	153.327		4	115	183.922		4	115	236.746		4	115	236.254
4	116	132.558		4	116	192.71		4	116	190.715		4	116	246.123
4	117	122.434		4	117	191.512		4	117	222.359		4	117	255.195
4	118	156.083		4	118	194.965		4	118	218.479		4	118	251.361
4	119	150.648		4	119	194.58		4	119	181.577		4	119	186.517
4	120	151.521		4	120	177.553		4	120	162.446		4	120	261.867
4	121	152.118		4	121	174.144		4	121	142.082		4	121	253.351
4	122	160.461		4	122	191.272		4	122	172.053		4	122	239.508
4	123	159.285		4	123	191.602		4	123	167.659		4	123	255.214
4	124	158.094		4	124	179.029		4	124	239.083		4	124	269.037
4	125	163.413		4	125	192.032		4	125	221.037		4	125	252.635
4	126	153.294		4	126	196.48		4	126	237.426		4	126	246.975
4	127	156.153		4	127	196.408		4	127	230.751		4	127	243.111
4	128	122.492		4	128	168.363		4	128	174.488		4	128	249.465
4	129	121.761		4	129	200.911		4	129	235.916		4	129	243.805
4	130	154.6		4	130	188.619		4	130	230.308		4	130	257.912
4	131	152.949		4	131	200.158		4	131	249.76		4	131	244.515
4	132	156.911		4	132	193.779		4	132	207.192		4	132	243.777
4	133	122.038		4	133	156.673		4	133	227.653		4	133	228.09
4	134	160.507		4	134	197.317		4	134	148.501		4	134	254.132
4	135	155.364		4	135	200.244		4	135	240.752		4	135	261.914
4	136	160.35		4	136	194.374		4	136	218.867		4	136	250.766
4	137	156.102		4	137	198.382		4	137	263.819		4	137	256.802
4	138	159.77		4	138	190.878		4	138	232.349		4	138	241.453
4	139	156.645		4	139	139.425		4	139	201.081		4	139	250.677
4	140	153.824		4	140	195.553		4	140	225.372		4	140	155.518
4	141	158.235		4	141	193.738		4	141	168.811		4	141	246.05
4	142	159.628		4	142	185.104		4	142	238.813		4	142	252.69
4	143	160.262		4	143	192.915		4	143	221.018		4	143	196.025
4	144	158.174		4	144	186.161		4	144	233.986		4	144	250.65
4	145	154.884		4	145	181.18		4	145	228.736		4	145	257.939
4	146	137.887		4	146	192.917		4	146	224.933		4	146	244.573
4	147	150.915		4	147	191.521		4	147	219.513		4	147	187.492
4	148	156.779		4	148	191.427		4	148	139.862		4	148	254.798
4	149	151.972		4	149	186.233		4	149	218.021		4	149	250.935
4	150	126.457		4	150	204.403		4	150	227.632		4	150	250.697
4	151	128.567		4	151	196.79		4	151	213.037		4	151	235.532
4	152	160.199		4	152	198.876		4	152	227.875		4	152	256.65
4	153	154.357		4	153	198.014		4	153	185.022		4	153	240.452
4	154	153.294		4	154	189.05		4	154	230.375		4	154	239.163
4	155	150.43		4	155	190.833		4	155	144.811		4	155	249.867
4	156	121.236		4	156	187.264		4	156	176.966		4	156	258.197
4	157	156.593		4	157	186.589		4	157	238.513		4	157	243.445
4	158	148.973		4	158	192.834		4	158	227.68		4	158	236.743
4	159	122.2		4	159	187.027		4	159	213.915		4	159	165.844
4	160	154.619		4	160	197.421		4	160	210.754		4	160	252.615
4	161	152.234		4	161	166.237		4	161	155.588		4	161	245.701
4	162	156.701		4	162	185.56		4	162	225.558		4	162	243.13
4	163	156.979		4	163	198.844		4	163	169.694		4	163	247.445
4	164	157.637		4	164	180.367		4	164	214.934		4	164	240.05
4	165	150.649		4	165	183.887		4	165	222.718		4	165	259.715
4	166	150.265		4	166	183.895		4	166	182.611		4	166	255.191
4	167	165.042		4	167	214.384		4	167	243.148		4	167	246.048
4	168	161.17		4	168	199.222		4	168	219.91		4	168	244.331
4	169	157.011		4	169	187.389		4	169	228.766		4	169	249.042
4	170	164.365		4	170	189.336		4	170	235.14		4	170	247.317
4	171	154.907		4	171	194.072		4	171	226.579		4	171	254.591
4	172	157.902		4	172	194.547		4	172	229.56		4	172	239.754
4	173	143.525		4	173	186.867		4	173	232.391		4	173	169.052
4	174	161.367		4	174	194.132		4	174	250.21		4	174	257.427
4	175	145.369		4	175	182.258		4	175	227.461		4	175	251.583
4	176	154.94		4	176	186.469		4	176	238.453		4	176	254.616
4	177	122.692		4	177	144.8		4	177	233.21		4	177	256.161
4	178	150.04		4	178	186.202		4	178	223.465		4	178	251.195
4	179	160.227		4	179	186.73		4	179	227.04		4	179	249.187
4	180	158.825		4	180	185.812		4	180	217.739		4	180	250.614
4	181	146.296		4	181	183.24		4	181	171.848		4	181	236.506
4	182	156.704		4	182	203.627		4	182	190.658		4	182	270.142
4	183	130.73		4	183	187.117		4	183	233.908		4	183	243.531
4	184	136.485		4	184	197.635		4	184	223.774		4	184	245.002
4	185	159.732		4	185	162.887		4	185	219.729		4	185	253.292
4	186	179.696		4	186	182.412		4	186	210.934		4	186	242.494
4	187	157.332		4	187	191.064		4	187	217.903		4	187	256.01
4	188	157.96		4	188	152.821		4	188	236.864		4	188	166.258
4	189	157.392		4	189	142.129		4	189	229.185		4	189	244.491
4	190	161.415		4	190	194.644		4	190	229.896		4	190	236.201
4	191	154.191		4	191	196.556		4	191	228.763		4	191	249.482
4	192	156.994		4	192	183.519		4	192	234.967		4	192	247.276
4	193	150.657		4	193	195.177		4	193	228.054		4	193	246.042
4	194	124.975		4	194	184.79		4	194	181.92		4	194	245.585
4	195	153.198		4	195	187.82		4	195	235.458		4	195	248.525
4	196	150.216		4	196	157.82		4	196	221.739		4	196	243.944
4	197	125.027		4	197	198.995		4	197	211.774		4	197	246.181
4	198	154.276		4	198	197.938		4	198	234.238		4	198	253.452
4	199	154.614		4	199	187.528		4	199	161.631		4	199	246.845
4	200	161.283		4	200	190.497		4	200	232.816		4	200	253.403
4	201	138.481		4	201	192.442		4	201	218.729		4	201	255.775
4	202	157.648		4	202	179.257		4	202	224.248		4	202	257.744
4	203	152.77		4	203	198.048		4	203	231.81		4	203	252.377
4	204	151.139		4	204	175.882		4	204	230.391		4	204	253.498
4	205	152.686		4	205	190.776		4	205	233.222		4	205	249.914
4	206	157.925		4	206	139.758		4	206	218.529		4	206	236.999
4	207	159.57		4	207	189.846		4	207	232.981		4	207	234.64
4	208	154.556		4	208	189.5		4	208	236.107		4	208	243.309
4	209	160.543		4	209	188.02		4	209	226.187		4	209	254.42
4	210	158.836		4	210	154.437		4	210	175.778		4	210	233.829
4	211	155.022		4	211	187.825		4	211	234.631		4	211	242.855
4	212	153.114		4	212	196.782		4	212	226.071		4	212	248.542
4	213	159.762		4	213	189.402		4	213	229.709		4	213	244.271
4	214	156.459		4	214	202.609		4	214	140.69		4	214	257.528
4	215	157.235		4	215	140.053		4	215	223.683		4	215	254.239
4	216	152.473		4	216	186.973		4	216	229.314		4	216	256.083
4	217	154.977		4	217	187.088		4	217	230.89		4	217	243.87
4	218	155.422		4	218	186.444		4	218	234.535		4	218	241.506
4	219	160.08		4	219	186.798		4	219	240.718		4	219	255.719
4	220	161.107		4	220	184.768		4	220	160.571		4	220	255.233
4	221	161.161		4	221	174.485		4	221	224.923		4	221	239.126
4	222	154.081		4	222	165.854		4	222	227.971		4	222	237.401
4	223	135.7		4	223	167.457		4	223	232.077		4	223	258.047
4	224	125.816		4	224	192.218		4	224	219.625		4	224	254.92
4	225	157.705		4	225	156.503		4	225	220.111		4	225	181.424
4	226	153.954		4	226	142.669		4	226	225.705		4	226	260.222
4	227	153.416		4	227	169.583		4	227	208.812		4	227	236.171
4	228	161.785		4	228	185.242		4	228	190.995		4	228	248.866
4	229	152.451		4	229	189.877		4	229	234.168		4	229	253.7
4	230	154.859		4	230	182.949		4	230	146.478		4	230	249.512
4	231	153.678		4	231	196.817		4	231	229.173		4	231	248.122
4	232	162.425		4	232	205.495		4	232	230.897		4	232	252.514
4	233	150.733		4	233	198.832		4	233	229.175		4	233	245.473
4	234	156.55		4	234	186.62		4	234	234.813		4	234	137.148
4	235	126.26		4	235	185.872		4	235	230.701		4	235	252.76
4	236	157.829		4	236	195.993		4	236	187.234		4	236	237.125
4	237	157.149		4	237	180.036		4	237	213.882		4	237	250.689
4	238	157.396		4	238	159.638		4	238	232.469		4	238	251.27
4	239	157.872		4	239	183.332		4	239	216.219		4	239	243.498
4	240	158.285		4	240	191.141		4	240	226.91		4	240	247.084
4	241	160.015		4	241	194.746		4	241	160.646		4	241	261.78
4	242	154.642		4	242	227.194		4	242	181.133		4	242	165.127
4	243	158.834		4	243	193.154		4	243	141.935		4	243	245.976
4	244	149.421		4	244	187.839		4	244	186.341		4	244	250.372
4	245	154.361		4	245	136.966		4	245	164.19		4	245	250.165
4	246	154.165		4	246	189.754		4	246	218.747		4	246	246.169
4	247	157.536		4	247	191.263		4	247	149.861		4	247	178.634
4	248	158.799		4	248	187.052		4	248	226.166		4	248	141.3
4	249	132.029		4	249	154.65		4	249	209.647		4	249	247.306
4	250	166.332		4	250	193.512		4	250	216.301		4	250	257.594
4	251	161.6		4	251	189.724		4	251	231.709		4	251	240.419
4	252	156.322		4	252	183.447		4	252	228.249		4	252	258.423
4	253	153.013		4	253	185.032		4	253	212.33		4	253	256.465
4	254	124.653		4	254	197.088		4	254	243.526		4	254	264.18
4	255	159.631		4	255	193.641		4	255	161.638		4	255	260.528
4	256	155.384		4	256	191.19		4	256	179.946		4	256	246.8
4	257	157.278		4	257	204.146		4	257	219.165		4	257	250.649
4	258	150.127		4	258	180.231		4	258	221.893		4	258	258.696
4	259	157.253		4	259	190.468		4	259	223.99		4	259	249.937
4	260	159.983		4	260	153.356		4	260	226.628		4	260	262.529
4	261	162.971		4	261	191.342		4	261	249.527		4	261	251.356
4	262	157.045		4	262	199.2		4	262	226.462		4	262	254.443
4	263	164.274		4	263	197.565		4	263	221.203		4	263	251.866
4	264	155.212		4	264	194.325		4	264	229.423		4	264	256.86
4	265	155.133		4	265	180.583		4	265	224.362		4	265	203.817
4	266	159.416		4	266	186.55		4	266	225.692		4	266	251.866
4	267	162.578		4	267	191.929		4	267	156.1		4	267	258.246
4	268	163.946		4	268	198.62		4	268	234.975		4	268	258.541
4	269	155.335		4	269	188.942		4	269	217.345		4	269	152.701
4	270	154.56		4	270	173.048		4	270	244.256		4	270	244.757
4	271	125.368		4	271	174.118		4	271	246.49		4	271	241.07
4	272	156.308		4	272	199.148		4	272	218.214		4	272	251.737
4	273	159.798		4	273	138.707		4	273	218.163		4	273	251.162
4	274	157.552		4	274	193.089		4	274	150.071		4	274	243.953
4	275	161.414		4	275	165.1		4	275	174.047		4	275	260.359
4	276	150.437		4	276	201.551		4	276	226.485		4	276	243.712
4	277	159.02		4	277	191.886		4	277	226.941		4	277	252.381
4	278	155.234		4	278	184.116		4	278	232.093		4	278	154.433
4	279	154.756		4	279	147.921		4	279	192.501		4	279	243.868
4	280	154.288		4	280	199.095		4	280	231.115		4	280	248.926
4	281	166.096		4	281	191.476		4	281	227.939		4	281	242.765
4	282	156.352		4	282	191.269		4	282	208.62		4	282	248.292
4	283	156.664		4	283	182.127		4	283	175.852		4	283	247.047
4	284	156.705		4	284	161.494		4	284	217.765		4	284	255.399
4	285	155.437		4	285	182.79		4	285	165.496		4	285	252.458
4	286	157.409		4	286	186.776		4	286	228.034		4	286	258.347
4	287	158.869		4	287	188.6		4	287	219.447		4	287	194.327
4	288	159.568		4	288	216.753		4	288	231.845		4	288	253.194
4	289	152.042		4	289	194.953		4	289	224.5		4	289	248.218
4	290	155.141		4	290	176.127		4	290	222.49		4	290	252.728
4	291	156.292		4	291	195.906		4	291	228.547		4	291	244.487
4	292	120.938		4	292	196.613		4	292	234.995		4	292	253.526
4	293	150.471		4	293	193.292		4	293	155.537		4	293	260.064
4	294	146.002		4	294	188.014		4	294	230.53		4	294	256.912
4	295	159.001		4	295	185.487		4	295	219.635		4	295	258.109
4	296	158.593		4	296	192.287		4	296	226.198		4	296	254.834
4	297	116.027		4	297	198.77		4	297	227.6		4	297	249.33
4	298	162.784		4	298	195.15		4	298	229.991		4	298	251.571
4	299	151.924		4	299	191.685		4	299	238.05		4	299	262.008
5	0	156.553		5	0	187.905		5	0	221.631		5	0	249.159
5	1	150.693		5	1	193.999		5	1	212.61		5	1	151.494
5	2	160.157		5	2	192.434		5	2	226.91		5	2	253.586
5	3	159.921		5	3	158.128		5	3	207.066		5	3	243.064
5	4	156.496		5	4	194.722		5	4	233.459		5	4	256.631
5	5	159.874		5	5	184.125		5	5	238.134		5	5	251.198
5	6	158.628		5	6	208.803		5	6	246.856		5	6	252.066
5	7	160.944		5	7	198.643		5	7	218.38		5	7	244.751
5	8	158.572		5	8	178.402		5	8	142.432		5	8	246.674
5	9	159.223		5	9	193.857		5	9	225.097		5	9	255.418
5	10	154.453		5	10	195.599		5	10	238.192		5	10	249.643
5	11	154.709		5	11	190.513		5	11	168.033		5	11	246.605
5	12	146.204		5	12	195.862		5	12	222.529		5	12	252.014
5	13	151.748		5	13	153.693		5	13	244.236		5	13	252.858
5	14	161.812		5	14	194.963		5	14	225.793		5	14	212.945
5	15	153.665		5	15	190.725		5	15	179.737		5	15	355.398
5	16	133.476		5	16	140.964		5	16	213.961		5	16	232.389
5	17	160.143		5	17	192.845		5	17	230.611		5	17	252.334
5	18	156.9		5	18	194.24		5	18	151.297		5	18	255.176
5	19	155.509		5	19	177.066		5	19	192.11		5	19	253.385
5	20	163.008		5	20	193.73		5	20	232.982		5	20	249.827
5	21	156.28		5	21	188.841		5	21	222.09		5	21	255.325
5	22	154.69		5	22	146.424		5	22	227.741		5	22	239.819
5	23	157.13		5	23	198.459		5	23	188.811		5	23	250.026
5	24	152.388		5	24	193.745		5	24	231.263		5	24	251.319
5	25	156.78		5	25	195.751		5	25	238.979		5	25	251.035
5	26	151.055		5	26	165.832		5	26	145.932		5	26	238.423
5	27	151.148		5	27	191.829		5	27	223.504		5	27	231.258
5	28	151.163		5	28	197.782		5	28	215.604		5	28	203.79
5	29	159.52		5	29	198.065		5	29	166.691		5	29	257.848
5	30	151.048		5	30	197.462		5	30	235.237		5	30	263.04
5	31	156.6		5	31	195.91		5	31	215.416		5	31	241.156
5	32	152.316		5	32	192.115		5	32	223.092		5	32	252.881
5	33	155.641		5	33	197.862		5	33	204.765		5	33	231.102
5	34	154.392		5	34	176.825		5	34	224.843		5	34	251.684
5	35	152.799		5	35	188.848		5	35	219.981		5	35	192.599
5	36	129.425		5	36	148.524		5	36	225.058		5	36	252.178
5	37	161.8		5	37	188.727		5	37	216.592		5	37	249.541
5	38	159.582		5	38	191.272		5	38	232.978		5	38	250.032
5	39	161.797		5	39	198.744		5	39	242.025		5	39	164.078
5	40	158.906		5	40	193.345		5	40	229.644		5	40	251.268
5	41	157.086		5	41	187.559		5	41	158.858		5	41	252.109
5	42	158.618		5	42	184.236		5	42	156.87		5	42	249.638
5	43	159.163		5	43	186.946		5	43	199.515		5	43	244.723
5	44	162.517		5	44	194.181		5	44	217.832		5	44	268.866
5	45	155.31		5	45	174.663		5	45	272.143		5	45	161.464
5	46	160.181		5	46	196.004		5	46	223.254		5	46	209.349
5	47	158.483		5	47	197.562		5	47	217.569		5	47	246.318
5	48	153.585		5	48	191.091		5	48	208.076		5	48	247.464
5	49	158.15		5	49	188.254		5	49	237.302		5	49	245.791
5	50	156.11		5	50	204.483		5	50	224.24		5	50	249.77
5	51	135.908		5	51	197.939		5	51	227.454		5	51	247.235
5	52	159.693		5	52	184.754		5	52	140.822		5	52	157.708
5	53	158.292		5	53	173.549		5	53	226.566		5	53	241.641
5	54	153.63		5	54	187.122		5	54	214.623		5	54	245.973
5	55	146.298		5	55	184.045		5	55	157.055		5	55	267.193
5	56	166.353		5	56	189.96		5	56	208.118		5	56	251.124
5	57	158.706		5	57	170.698		5	57	225.039		5	57	270.059
5	58	156.705		5	58	190.548		5	58	242.448		5	58	261.44
5	59	135.372		5	59	200.389		5	59	153.457		5	59	261.904
5	60	159.444		5	60	148.426		5	60	157.768		5	60	248.271
5	61	155.432		5	61	199.836		5	61	176.47		5	61	245.138
5	62	156.407		5	62	187.023		5	62	226.386		5	62	244.121
5	63	153.021		5	63	192.045		5	63	229.543		5	63	255.337
5	64	155.942		5	64	194.481		5	64	228.768		5	64	252.361
5	65	155.768		5	65	188.241		5	65	224.874		5	65	238.333
5	66	156.365		5	66	195.963		5	66	221.567		5	66	256.138
5	67	153.833		5	67	177.036		5	67	230.095		5	67	244.636
5	68	158.815		5	68	187.84		5	68	225.751		5	68	245.325
5	69	157.274		5	69	179.96		5	69	220.807		5	69	132.13
5	70	154.352		5	70	149.337		5	70	154.715		5	70	245.912
5	71	126.984		5	71	188.068		5	71	165.373		5	71	243.746
5	72	160.62		5	72	187.406		5	72	251.898		5	72	250.415
5	73	128.628		5	73	201.93		5	73	184.83		5	73	273.045
5	74	141.025		5	74	178.33		5	74	234.269		5	74	250.362
5	75	149.866		5	75	151.604		5	75	226.301		5	75	250.978
5	76	138.698		5	76	208.703		5	76	223.914		5	76	231.119
5	77	162.062		5	77	165.568		5	77	168.29		5	77	243.146
5	78	129.275		5	78	184.897		5	78	218.025		5	78	237.744
5	79	158.943		5	79	143.643		5	79	220.016		5	79	248.192
5	80	152.281		5	80	189.06		5	80	232.128		5	80	250.456
5	81	150.09		5	81	163.034		5	81	224.387		5	81	244.707
5	82	156.096		5	82	201.594		5	82	222.777		5	82	240.593
5	83	164.034		5	83	188.081		5	83	229.555		5	83	251.698
5	84	156.27		5	84	184.58		5	84	257.537		5	84	250.164
5	85	149.43		5	85	202.158		5	85	215.592		5	85	238.922
5	86	157.508		5	86	190.122		5	86	218.767		5	86	248.013
5	87	151.9		5	87	188.855		5	87	230.792		5	87	251.199
5	88	151.59		5	88	191.087		5	88	157.86		5	88	247.52
5	89	163.084		5	89	193.89		5	89	217.989		5	89	252.7
5	90	159.49		5	90	135.759		5	90	224.84		5	90	250.607
5	91	125.759		5	91	187.812		5	91	142.209		5	91	250.021
5	92	159.593		5	92	191.076		5	92	228.936		5	92	257.262
5	93	158.322		5	93	195.666		5	93	213.14		5	93	253.316
5	94	160.268		5	94	181.94		5	94	231.661		5	94	242.368
5	95	154.72		5	95	193.581		5	95	235.635		5	95	250.822
5	96	157.053		5	96	193.691		5	96	225.757		5	96	253.457
5	97	129.536		5	97	199.49		5	97	230.479		5	97	256.788
5	98	158.622		5	98	192.026		5	98	228.52		5	98	246.089
5	99	155.507		5	99	186.343		5	99	227.778		5	99	244.119
5	100	132.271		5	100	201.53		5	100	215.572		5	100	240.488
5	101	158.724		5	101	190.57		5	101	225.198		5	101	226.519
5	102	152.355		5	102	183.445		5	102	187.498		5	102	165.554
5	103	152.459		5	103	188.434		5	103	220.009		5	103	277.979
5	104	156.192		5	104	199.046		5	104	154.697		5	104	246.61
5	105	157.158		5	105	184.626		5	105	221.924		5	105	256.485
5	106	160.161		5	106	182.997		5	106	137.543		5	106	254.595
5	107	158.989		5	107	204.417		5	107	214.715		5	107	251.833
5	108	146.09		5	108	156.756		5	108	221.463		5	108	159.9
5	109	156.421		5	109	187.84		5	109	231.468		5	109	253.287
5	110	128.203		5	110	168.542		5	110	218.895		5	110	268.354
5	111	156.323		5	111	196.797		5	111	226.9		5	111	266.478
5	112	142.486		5	112	193.25		5	112	225.13		5	112	254.366
5	113	133.98		5	113	197.889		5	113	231.455		5	113	257.973
5	114	156.595		5	114	186.362		5	114	137.952		5	114	239.908
5	115	163.624		5	115	179.848		5	115	219.626		5	115	194.058
5	116	154.452		5	116	151.326		5	116	229.334		5	116	246.901
5	117	148.399		5	117	189.287		5	117	223.808		5	117	259.42
5	118	133.777		5	118	195.071		5	118	223.09		5	118	242.712
5	119	117.485		5	119	195.558		5	119	153.423		5	119	244.282
5	120	157.065		5	120	177.972		5	120	196.054		5	120	249.707
5	121	160.293		5	121	188.093		5	121	169.386		5	121	255.321
5	122	159.224		5	122	136.568		5	122	231.111		5	122	249.444
5	123	154.372		5	123	199.349		5	123	222.515		5	123	242.552
5	124	158.683		5	124	185.785		5	124	222.742		5	124	253.316
5	125	131.803		5	125	199.126		5	125	225.398		5	125	256.728
5	126	147.221		5	126	198.479		5	126	231.14		5	126	251.444
5	127	153.208		5	127	195.961		5	127	229.869		5	127	248.757
5	128	158.665		5	128	196.945		5	128	205.639		5	128	249.808
5	129	129.764		5	129	185.607		5	129	232.856		5	129	239.926
5	130	160.45		5	130	187.375		5	130	223.873		5	130	250.775
5	131	128.191		5	131	193.98		5	131	235.221		5	131	245.781
5	132	156.752		5	132	185.612		5	132	227.741		5	132	242.045
5	133	161.959		5	133	191.529		5	133	217.497		5	133	246.154
5	134	121.279		5	134	192.273		5	134	234.77		5	134	246.629
5	135	160.35		5	135	164.939		5	135	236.032		5	135	256.115
5	136	159.011		5	136	184.512		5	136	220.039		5	136	245.681
5	137	130.799		5	137	193.216		5	137	155.578		5	137	247.583
5	138	162.229		5	138	196.339		5	138	157.401		5	138	241.701
5	139	152.072		5	139	178.567		5	139	211.203		5	139	137.992
5	140	158.969		5	140	199.721		5	140	222.638		5	140	256.37
5	141	160.889		5	141	197.629		5	141	177.725		5	141	257.814
5	142	158.712		5	142	194.655		5	142	204.129		5	142	268.512
5	143	157.714		5	143	183.474		5	143	178.955		5	143	267.328
5	144	154.897		5	144	131.808		5	144	228.983		5	144	201.072
5	145	141.235		5	145	182.766		5	145	213.102		5	145	248.719
5	146	159.883		5	146	178.041		5	146	198.742		5	146	249.029
5	147	153.765		5	147	201.3		5	147	162.752		5	147	247.357
5	148	161.007		5	148	193.469		5	148	164.328		5	148	248.467
5	149	152.673		5	149	191.008		5	149	155.862		5	149	252.411
5	150	154.174		5	150	178.101		5	150	220.44		5	150	247.336
5	151	155.521		5	151	194.709		5	151	230.379		5	151	258.529
5	152	137.348		5	152	199.037		5	152	224.367		5	152	268.227
5	153	151.268		5	153	198.991		5	153	220.38		5	153	253.356
5	154	154.333		5	154	197.772		5	154	219.975		5	154	254.315
5	155	152.999		5	155	183.751		5	155	228.594		5	155	252.614
5	156	157.17		5	156	189.018		5	156	219.109		5	156	242.893
5	157	157.565		5	157	141.545		5	157	159.7		5	157	243.759
5	158	152.038		5	158	190.356		5	158	233.938		5	158	259.58
5	159	116.399		5	159	180.837		5	159	231.226		5	159	252.624
5	160	159.674		5	160	197.578		5	160	234.799		5	160	257.398
5	161	157.897		5	161	163.81		5	161	221.138		5	161	257.483
5	162	155.169		5	162	199.303		5	162	226.335		5	162	243.939
5	163	155.032		5	163	193.855		5	163	227.659		5	163	139.443
5	164	155.929		5	164	182.439		5	164	233.575		5	164	257.653
5	165	149.114		5	165	186.542		5	165	227.584		5	165	243.906
5	166	158.908		5	166	196.41		5	166	229.892		5	166	259.445
5	167	159.301		5	167	201.919		5	167	206.364		5	167	256.87
5	168	123.317		5	168	202.591		5	168	236.919		5	168	254.156
5	169	166.195		5	169	203.285		5	169	218.881		5	169	240.206
5	170	153.359		5	170	191.965		5	170	223.343		5	170	271.313
5	171	150.994		5	171	195.436		5	171	228.276		5	171	212.626
5	172	162.423		5	172	192.78		5	172	196.803		5	172	253.286
5	173	126.793		5	173	169.969		5	173	171.595		5	173	247.598
5	174	156.623		5	174	188.6		5	174	288.049		5	174	250.774
5	175	157.372		5	175	198.166		5	175	163.67		5	175	249.953
5	176	154.392		5	176	198.669		5	176	233.666		5	176	248.129
5	177	156.135		5	177	206.974		5	177	233.393		5	177	257.461
5	178	161.597		5	178	188.195		5	178	225.263		5	178	248.473
5	179	160.011		5	179	191.735		5	179	237.095		5	179	262.028
5	180	156.518		5	180	196.056		5	180	219.58		5	180	245.859
5	181	156.257		5	181	194.194		5	181	227.711		5	181	251.765
5	182	159.947		5	182	189.28		5	182	222.457		5	182	267.269
5	183	153.71		5	183	190.035		5	183	181.579		5	183	254.801
5	184	125.677		5	184	152.242		5	184	228.696		5	184	252.75
5	185	135.628		5	185	185.9		5	185	144.493		5	185	264.816
5	186	161.866		5	186	151.442		5	186	208.118		5	186	250.415
5	187	159.325		5	187	191.72		5	187	224.614		5	187	227.109
5	188	147.375		5	188	198.297		5	188	233.988		5	188	256.577
5	189	161.979		5	189	159.337		5	189	188.702		5	189	251.822
5	190	159.168		5	190	150.306		5	190	222.348		5	190	251.492
5	191	158.905		5	191	156.808		5	191	172.758		5	191	260.017
5	192	162.541		5	192	225.945		5	192	164.553		5	192	255.772
5	193	148.832		5	193	132.917		5	193	226.292		5	193	253.788
5	194	149.873		5	194	163.243		5	194	239.522		5	194	256.932
5	195	159.103		5	195	183.733		5	195	228.042		5	195	204.692
5	196	150.318		5	196	150.046		5	196	215.806		5	196	234.91
5	197	124.88		5	197	185.447		5	197	230.056		5	197	252.915
5	198	156.159		5	198	192.664		5	198	230.903		5	198	240.66
5	199	132.934		5	199	121.85		5	199	225.936		5	199	263.991
5	200	156.198		5	200	190.049		5	200	232.957		5	200	234.545
5	201	159.158		5	201	198.267		5	201	223.467		5	201	251.852
5	202	150.771		5	202	130.406		5	202	165.973		5	202	284.44
5	203	168.703		5	203	187.26		5	203	147.726		5	203	236.234
5	204	157.184		5	204	192.563		5	204	228.234		5	204	166.083
5	205	157.48		5	205	188.555		5	205	217.372		5	205	170.986
5	206	164.046		5	206	189.879		5	206	149.575		5	206	258.918
5	207	125.288		5	207	186.339		5	207	237.684		5	207	165.765
5	208	120.309		5	208	174.562		5	208	232.347		5	208	263.283
5	209	153.434		5	209	206.617		5	209	214.404		5	209	265.191
5	210	147.848		5	210	194.914		5	210	208.184		5	210	259.885
5	211	157.675		5	211	159.52		5	211	227.299		5	211	252.255
5	212	133.775		5	212	185.118		5	212	232.852		5	212	253.886
5	213	155.389		5	213	192.821		5	213	241.461		5	213	211.161
5	214	135.767		5	214	190.273		5	214	225.295		5	214	261.983
5	215	160.348		5	215	189.97		5	215	213.718		5	215	236.979
5	216	159.268		5	216	193.287		5	216	210.872		5	216	254.764
5	217	151.589		5	217	142.368		5	217	224.844		5	217	256.088
5	218	154.367		5	218	191.127		5	218	230.072		5	218	249.821
5	219	162.3		5	219	151.605		5	219	217.895		5	219	264.032
5	220	154.762		5	220	183.737		5	220	231.921		5	220	250.383
5	221	155.885		5	221	192.228		5	221	172.07		5	221	222.889
5	222	159.073		5	222	195.695		5	222	234.765		5	222	255.345
5	223	159.075		5	223	183.857		5	223	227.31		5	223	240.748
5	224	133.49		5	224	160.323		5	224	259.73		5	224	224.169
5	225	142.48		5	225	142.01		5	225	202.504		5	225	258.016
5	226	158.969		5	226	188.242		5	226	215.471		5	226	258.346
5	227	162.83		5	227	183.138		5	227	216.066		5	227	263.132
5	228	156.993		5	228	190.503		5	228	234.514		5	228	250.205
5	229	154.341		5	229	157.755		5	229	170.118		5	229	254.255
5	230	162.117		5	230	190.285		5	230	222.091		5	230	240.774
5	231	152.801		5	231	179.196		5	231	169.041		5	231	241.337
5	232	162.742		5	232	214.375		5	232	220.326		5	232	232.228
5	233	154.199		5	233	191.108		5	233	221.569		5	233	259.207
5	234	153.825		5	234	196.525		5	234	223.233		5	234	253.662
5	235	162.526		5	235	189.1		5	235	158.293		5	235	246.913
5	236	161.795		5	236	189.524		5	236	156.779		5	236	251.711
5	237	136.366		5	237	188.398		5	237	190.318		5	237	250.052
5	238	156.491		5	238	228.906		5	238	188.943		5	238	269.557
5	239	157.515		5	239	199.698		5	239	222.311		5	239	243.513
5	240	158.118		5	240	177.686		5	240	203.247		5	240	250.162
5	241	153.722		5	241	191.847		5	241	226.911		5	241	240.184
5	242	157.017		5	242	173.443		5	242	211.167		5	242	248.694
5	243	158.469		5	243	151.987		5	243	231.693		5	243	244.747
5	244	126.182		5	244	192.808		5	244	234.951		5	244	256.145
5	245	134.423		5	245	195.059		5	245	151.626		5	245	229.287
5	246	137.163		5	246	183.106		5	246	216.5		5	246	257.282
5	247	162.198		5	247	189.306		5	247	236.487		5	247	260.198
5	248	153.388		5	248	191.333		5	248	223.265		5	248	239.363
5	249	160.15		5	249	199.236		5	249	217.68		5	249	136.39
5	250	128.999		5	250	193.589		5	250	219.801		5	250	247.598
5	251	121.868		5	251	200.763		5	251	187.186		5	251	206.517
5	252	151.626		5	252	141.287		5	252	222.243		5	252	251.051
5	253	158.12		5	253	195.143		5	253	225.015		5	253	244.921
5	254	160.492		5	254	191.008		5	254	156.258		5	254	254.577
5	255	157.586		5	255	192.389		5	255	232.515		5	255	259.711
5	256	156.821		5	256	197.647		5	256	182.971		5	256	246.042
5	257	160.623		5	257	186.331		5	257	148.13		5	257	245.147
5	258	164.01		5	258	181.624		5	258	226.199		5	258	265.419
5	259	157.874		5	259	216.918		5	259	141.033		5	259	248.597
5	260	157.951		5	260	186.64		5	260	228.682		5	260	253.246
5	261	127.578		5	261	185.331		5	261	223.677		5	261	244.849
5	262	158.568		5	262	199.957		5	262	225.066		5	262	258.659
5	263	157.02		5	263	192.923		5	263	231.654		5	263	256.342
5	264	154.25		5	264	186.539		5	264	150.482		5	264	301.815
5	265	162.838		5	265	206.033		5	265	246.949		5	265	217.7
5	266	156.219		5	266	195.487		5	266	222.753		5	266	249.772
5	267	160.155		5	267	185.301		5	267	236.879		5	267	258.318
5	268	159.455		5	268	176.903		5	268	224.486		5	268	245.889
5	269	161.718		5	269	195.542		5	269	229.299		5	269	245.763
5	270	157.577		5	270	173.873		5	270	217.924		5	270	252.413
5	271	155.759		5	271	198.072		5	271	222.592		5	271	244.377
5	272	158.255		5	272	200.906		5	272	231		5	272	258.14
5	273	157.365		5	273	202.993		5	273	223.575		5	273	246.294
5	274	159.121		5	274	169.379		5	274	228.836		5	274	210.71
5	275	160.623		5	275	188.8		5	275	157.29		5	275	202.465
5	276	159.067		5	276	190.155		5	276	224.551		5	276	256.106
5	277	156.959		5	277	173.219		5	277	225.674		5	277	247.885
5	278	156.557		5	278	180.092		5	278	216.705		5	278	258.408
5	279	152.154		5	279	190.159		5	279	229.897		5	279	244.982
5	280	158.667		5	280	196.35		5	280	224.815		5	280	258.762
5	281	124.519		5	281	185.1		5	281	222.985		5	281	228.441
5	282	154.5		5	282	188.933		5	282	222.222		5	282	253.743
5	283	156.427		5	283	195.532		5	283	145.436		5	283	252.159
5	284	124.466		5	284	186.878		5	284	229.372		5	284	246.635
5	285	166.904		5	285	197.097		5	285	219.071		5	285	247.774
5	286	155.341		5	286	187.36		5	286	235.396		5	286	256.662
5	287	161.83		5	287	192.716		5	287	218.101		5	287	252.715
5	288	154.854		5	288	176.849		5	288	170.73		5	288	257.504
5	289	156.047		5	289	199.379		5	289	223.592		5	289	269.038
5	290	155.664		5	290	194.164		5	290	186.123		5	290	250.085
5	291	153.379		5	291	200.862		5	291	225.854		5	291	253.123
5	292	129.145		5	292	188.85		5	292	211.635		5	292	257.785
5	293	148.721		5	293	199.333		5	293	214.259		5	293	237.187
5	294	159.519		5	294	202.262		5	294	222.639		5	294	248.322
5	295	159.808		5	295	191.131		5	295	227.527		5	295	233.565
5	296	156.083		5	296	185.462		5	296	183.185		5	296	256.178
5	297	154.741		5	297	185.78		5	297	222.728		5	297	232.961
5	298	163.319		5	298	183.662		5	298	215.207		5	298	247.283
5	299	151.809		5	299	195.518		5	299	196.796		5	299	255.746
6	0	162.57		6	0	193.782		6	0	196.704		6	0	210.992
6	1	157.326		6	1	192.292		6	1	232.818		6	1	253.522
6	2	153.191		6	2	178.544		6	2	155.156		6	2	242.407
6	3	161.351		6	3	135.109		6	3	138.778		6	3	247.004
6	4	154.483		6	4	191.12		6	4	171.985		6	4	215.042
6	5	159.858		6	5	186.465		6	5	211.055		6	5	262.596
6	6	163.455		6	6	164.678		6	6	236.583		6	6	264.382
6	7	152.943		6	7	190.281		6	7	246.499		6	7	244.078
6	8	154.565		6	8	194.124		6	8	232.4		6	8	243.028
6	9	154.248		6	9	144.075		6	9	229.202		6	9	250.412
6	10	158.647		6	10	145.097		6	10	215.75		6	10	256.825
6	11	155.859		6	11	179.01		6	11	233.875		6	11	254.872
6	12	150.281		6	12	195.281		6	12	161.785		6	12	248.483
6	13	156.842		6	13	193.918		6	13	217.819		6	13	175.995
6	14	159.706		6	14	201.017		6	14	232.895		6	14	149.845
6	15	156.778		6	15	189.367		6	15	220.356		6	15	254.322
6	16	148.314		6	16	204.197		6	16	208.63		6	16	245.796
6	17	153.367		6	17	189.048		6	17	221.325		6	17	249.586
6	18	163.785		6	18	200.145		6	18	178.861		6	18	212.484
6	19	126.885		6	19	194.613		6	19	223.607		6	19	194.834
6	20	154.832		6	20	167.953		6	20	186.936		6	20	254.025
6	21	120.272		6	21	177.501		6	21	193.195		6	21	170.451
6	22	153.397		6	22	200.22		6	22	140.777		6	22	242.192
6	23	156.037		6	23	190.315		6	23	224.499		6	23	257.105
6	24	124.036		6	24	193.214		6	24	216.48		6	24	249.001
6	25	150.487		6	25	188.833		6	25	158.835		6	25	238.492
6	26	155.845		6	26	201.738		6	26	224.994		6	26	251.506
6	27	136.286		6	27	196.505		6	27	149.281		6	27	249.963
6	28	153.407		6	28	200.122		6	28	228.23		6	28	296.58
6	29	150.9		6	29	191.381		6	29	152.754		6	29	251.984
6	30	155.462		6	30	193.161		6	30	228.914		6	30	254.896
6	31	154.285		6	31	190.155		6	31	231.085		6	31	238.628
6	32	156.876		6	32	194.877		6	32	221.333		6	32	250.979
6	33	163.783		6	33	200.111		6	33	162.094		6	33	251.166
6	34	159.718		6	34	199.206		6	34	185.356		6	34	268.393
6	35	155.427		6	35	196.782		6	35	244.974		6	35	202.61
6	36	161.142		6	36	195.282		6	36	170.474		6	36	242.226
6	37	155.428		6	37	202.86		6	37	219.058		6	37	222.428
6	38	146.226		6	38	200.263		6	38	144.832		6	38	232.815
6	39	152.372		6	39	139.189		6	39	204.084		6	39	258.871
6	40	138.177		6	40	192.522		6	40	182.79		6	40	235.625
6	41	159.106		6	41	191.878		6	41	223.245		6	41	259.266
6	42	154.81		6	42	204.832		6	42	195.459		6	42	259.605
6	43	145.998		6	43	142.419		6	43	232.726		6	43	241.158
6	44	155.85		6	44	138.016		6	44	225.535		6	44	255.225
6	45	159.153		6	45	180.787		6	45	185.891		6	45	240.583
6	46	165.194		6	46	144.853		6	46	220.419		6	46	232.064
6	47	158.592		6	47	194.043		6	47	231.612		6	47	232.645
6	48	166.592		6	48	196.318		6	48	156.972		6	48	156.356
6	49	162.154		6	49	193.537		6	49	152.708		6	49	228.8
6	50	155.709		6	50	201.571		6	50	221.221		6	50	263.33
6	51	150.895		6	51	194.301		6	51	183.299		6	51	238.092
6	52	148.999		6	52	185.678		6	52	177.155		6	52	248.754
6	53	154.63		6	53	136.174		6	53	169.827		6	53	247.888
6	54	155.409		6	54	206.255		6	54	218.285		6	54	247.585
6	55	155.617		6	55	172.728		6	55	236.354		6	55	257.93
6	56	157.65		6	56	158.664		6	56	205.452		6	56	243.419
6	57	155.046		6	57	164.93		6	57	214.295		6	57	240.185
6	58	142.548		6	58	176.734		6	58	235.099		6	58	248.69
6	59	152.95		6	59	184.46		6	59	174.913		6	59	235.568
6	60	157.733		6	60	197.77		6	60	222.908		6	60	233.159
6	61	153.035		6	61	194.804		6	61	189.391		6	61	240.97
6	62	155.738		6	62	195.326		6	62	223.689		6	62	245.79
6	63	160.814		6	63	193.048		6	63	224.771		6	63	238.25
6	64	145.142		6	64	195.452		6	64	231.201		6	64	245.35
6	65	164.258		6	65	189.71		6	65	221.232		6	65	252.123
6	66	156.311		6	66	203.904		6	66	156.571		6	66	241.254
6	67	149.709		6	67	189.32		6	67	243.275		6	67	253.733
6	68	155.403		6	68	199.362		6	68	145.254		6	68	201.445
6	69	162.564		6	69	190.249		6	69	231.579		6	69	251.06
6	70	158.759		6	70	173.542		6	70	246.501		6	70	246.635
6	71	153.73		6	71	190.604		6	71	244.984		6	71	257.475
6	72	150.48		6	72	202.047		6	72	220.967		6	72	249.193
6	73	124.229		6	73	138.143		6	73	159.969		6	73	248.724
6	74	156.957		6	74	150.245		6	74	223.313		6	74	238.431
6	75	160.614		6	75	192.682		6	75	251.101		6	75	262.94
6	76	136.358		6	76	188.379		6	76	241.48		6	76	262.244
6	77	151.935		6	77	192.681		6	77	157.576		6	77	242.674
6	78	153.361		6	78	194.299		6	78	232.907		6	78	228.398
6	79	164.874		6	79	178.487		6	79	143.06		6	79	237.085
6	80	164.049		6	80	184.817		6	80	149.441		6	80	246.534
6	81	160.084		6	81	187.048		6	81	268.281		6	81	240.988
6	82	157.421		6	82	182.28		6	82	230.44		6	82	252.114
6	83	150.666		6	83	188.409		6	83	222.983		6	83	250.131
6	84	157.25		6	84	186.472		6	84	216.528		6	84	150.453
6	85	165.201		6	85	182.48		6	85	230.481		6	85	241.446
6	86	156.105		6	86	194.995		6	86	235.814		6	86	248.441
6	87	160.393		6	87	191.364		6	87	220.219		6	87	247.984
6	88	139.451		6	88	160.257		6	88	223.981		6	88	240.325
6	89	162.69		6	89	196.733		6	89	212.083		6	89	251.229
6	90	152.606		6	90	196.175		6	90	221.176		6	90	254.288
6	91	153.913		6	91	190.348		6	91	235.005		6	91	247.544
6	92	154.165		6	92	174.336		6	92	223.13		6	92	260.08
6	93	158.155		6	93	199.884		6	93	223.43		6	93	200.579
6	94	157.757		6	94	198.559		6	94	194.467		6	94	254.764
6	95	157.226		6	95	153.912		6	95	198.359		6	95	250.77
6	96	157.305		6	96	199.5		6	96	178.824		6	96	251.716
6	97	159.977		6	97	160.45		6	97	179.591		6	97	254.155
6	98	156.161		6	98	188.727		6	98	230.304		6	98	249.96
6	99	161.546		6	99	201.177		6	99	145.213		6	99	254.658
6	100	154.637		6	100	131.53		6	100	243.897		6	100	235.789
6	101	154.955		6	101	204.19		6	101	227.17		6	101	249.698
6	102	159.567		6	102	195.779		6	102	239.96		6	102	251.979
6	103	157.636		6	103	195.108		6	103	157.792		6	103	204.256
6	104	158.236		6	104	186.272		6	104	221.565		6	104	246.367
6	105	167.399		6	105	195.057		6	105	176.8		6	105	288.158
6	106	125.637		6	106	189.481		6	106	232.894		6	106	255.056
6	107	157.443		6	107	194.12		6	107	219.697		6	107	256.599
6	108	154.535		6	108	186.563		6	108	239.541		6	108	251.782
6	109	151.045		6	109	201.129		6	109	149.229		6	109	273.725
6	110	157.013		6	110	157.897		6	110	239.014		6	110	238.968
6	111	149.222		6	111	175.956		6	111	215.562		6	111	210.862
6	112	154.291		6	112	190.193		6	112	220.122		6	112	215.62
6	113	157.887		6	113	162.413		6	113	141.908		6	113	249.623
6	114	158.571		6	114	192.911		6	114	211.66		6	114	255.068
6	115	156.006		6	115	203.795		6	115	213.062		6	115	258.869
6	116	160.023		6	116	167.708		6	116	225.192		6	116	258.054
6	117	157.296		6	117	190.626		6	117	241.63		6	117	233.666
6	118	162.054		6	118	148.25		6	118	183.711		6	118	251.705
6	119	155.215		6	119	189.813		6	119	199.145		6	119	257.778
6	120	157.244		6	120	186.92		6	120	219.107		6	120	243.263
6	121	155.857		6	121	193.046		6	121	232.988		6	121	272.726
6	122	155.972		6	122	195.009		6	122	205.513		6	122	237.259
6	123	163.251		6	123	162.417		6	123	155.891		6	123	254.021
6	124	158.024		6	124	139.683		6	124	220.102		6	124	136.232
6	125	125.303		6	125	185.331		6	125	236.484		6	125	187.05
6	126	147.681		6	126	194.655		6	126	201.221		6	126	244.573
6	127	156.73		6	127	135.636		6	127	189.722		6	127	229.625
6	128	158.92		6	128	187.493		6	128	237.445		6	128	181.505
6	129	156.378		6	129	200.028		6	129	219.107		6	129	256.443
6	130	155.903		6	130	196.488		6	130	214.306		6	130	248.131
6	131	152.889		6	131	197.322		6	131	217.487		6	131	256.263
6	132	128.723		6	132	149.331		6	132	177.042		6	132	231.091
6	133	157.467		6	133	175.689		6	133	238.053		6	133	242.323
6	134	156.143		6	134	177.858		6	134	222.035		6	134	256.415
6	135	153.878		6	135	196.397		6	135	173.561		6	135	234.899
6	136	121.174		6	136	186.486		6	136	221.3		6	136	254.697
6	137	157.137		6	137	198.493		6	137	219.677		6	137	253.76
6	138	153.238		6	138	175.038		6	138	222.621		6	138	187.37
6	139	123.498		6	139	198.378		6	139	224.724		6	139	241.093
6	140	131.131		6	140	199.967		6	140	213.179		6	140	247.157
6	141	152.441		6	141	198.192		6	141	218.574		6	141	241.059
6	142	161.734		6	142	191.616		6	142	222.703		6	142	267.663
6	143	156.604		6	143	194.755		6	143	186.008		6	143	161.488
6	144	165.844		6	144	194.403		6	144	173.018		6	144	259.959
6	145	155.721		6	145	199.189		6	145	208.413		6	145	244.867
6	146	147.516		6	146	194.066		6	146	205.732		6	146	193.585
6	147	156.438		6	147	193.384		6	147	159.806		6	147	179.275
6	148	150.873		6	148	198.918		6	148	206.522		6	148	257.761
6	149	159.509		6	149	187.028		6	149	220.779		6	149	257.177
6	150	154.539		6	150	187.338		6	150	209.146		6	150	238.725
6	151	150.971		6	151	170.297		6	151	154.194		6	151	231.711
6	152	162.189		6	152	150.885		6	152	233.334		6	152	232.366
6	153	156.867		6	153	193.998		6	153	231.653		6	153	256.237
6	154	159.15		6	154	143.635		6	154	223.579		6	154	260.69
6	155	154.165		6	155	162.371		6	155	234.244		6	155	245.821
6	156	158.106		6	156	192.661		6	156	177.313		6	156	252.5
6	157	144.474		6	157	185.617		6	157	231.869		6	157	256.6
6	158	122.364		6	158	187.519		6	158	203.4		6	158	231.844
6	159	157.478		6	159	196.632		6	159	213.694		6	159	247.28
6	160	163.876		6	160	171.228		6	160	170.764		6	160	202.344
6	161	132.025		6	161	188.389		6	161	184.534		6	161	248.213
6	162	148.872		6	162	185.288		6	162	244.512		6	162	233.667
6	163	155.026		6	163	184.537		6	163	222.222		6	163	241.962
6	164	155.486		6	164	203.437		6	164	227.883		6	164	237.358
6	165	164.114		6	165	193.202		6	165	209.584		6	165	264.011
6	166	153.098		6	166	161.904		6	166	222.787		6	166	243.535
6	167	165.112		6	167	140.01		6	167	245.851		6	167	260.598
6	168	139.171		6	168	182.837		6	168	223.361		6	168	249.512
6	169	154.595		6	169	189.749		6	169	154.856		6	169	246.26
6	170	136.934		6	170	200.458		6	170	179.416		6	170	249.719
6	171	152.716		6	171	193.237		6	171	162.081		6	171	130.256
6	172	159.129		6	172	184.537		6	172	143.359		6	172	245.954
6	173	162.056		6	173	191.242		6	173	185.881		6	173	241.785
6	174	155.229		6	174	208.336		6	174	166.359		6	174	245.621
6	175	121.751		6	175	169.786		6	175	125.329		6	175	251.282
6	176	154.546		6	176	203.211		6	176	157.664		6	176	241.638
6	177	156.346		6	177	157.192		6	177	222.315		6	177	225.59
6	178	157.165		6	178	193.568		6	178	204.151		6	178	256.862
6	179	152.618		6	179	135.95		6	179	144.052		6	179	253.687
6	180	158.884		6	180	199.011		6	180	227.17		6	180	249.632
6	181	155.752		6	181	203.907		6	181	216.881		6	181	238.087
6	182	153.868		6	182	199.404		6	182	219.357		6	182	258.167
6	183	153.657		6	183	198.661		6	183	224.059		6	183	233.835
6	184	153.706		6	184	198.73		6	184	136.134		6	184	244.59
6	185	155.09		6	185	188.954		6	185	214.846		6	185	246.742
6	186	154.48		6	186	194.77		6	186	211.137		6	186	251.888
6	187	155.29		6	187	178.524		6	187	211.612		6	187	249.365
6	188	155.605		6	188	196.513		6	188	233.57		6	188	265.58
6	189	159.893		6	189	154.164		6	189	190.421		6	189	244.193
6	190	161.21		6	190	199.175		6	190	195.62		6	190	245.756
6	191	152.247		6	191	191.643		6	191	223.274		6	191	239.879
6	192	155.546		6	192	195.147		6	192	166.034		6	192	246.198
6	193	157.189		6	193	186.839		6	193	198.631		6	193	223.971
6	194	160.291		6	194	192.968		6	194	220.234		6	194	255.355
6	195	160.404		6	195	195.009		6	195	170.395		6	195	236.6
6	196	156.972		6	196	195.377		6	196	222.302		6	196	230.694
6	197	152.077		6	197	189.077		6	197	144.285		6	197	286.555
6	198	123.832		6	198	200.706		6	198	226.291		6	198	257.861
6	199	116.198		6	199	197.898		6	199	211.101		6	199	227.363
6	200	151.864		6	200	200.976		6	200	249.623		6	200	253.108
6	201	155.574		6	201	185.919		6	201	184.974		6	201	233.466
6	202	132.068		6	202	184.863		6	202	198.471		6	202	242.606
6	203	122.452		6	203	179.026		6	203	225.328		6	203	255.435
6	204	156.429		6	204	185.397		6	204	224.489		6	204	225.022
6	205	162.711		6	205	180.313		6	205	249.945		6	205	246.53
6	206	162.825		6	206	153.615		6	206	235.123		6	206	253.579
6	207	154.569		6	207	184.343		6	207	181.087		6	207	251.247
6	208	164.646		6	208	187.356		6	208	226.967		6	208	263.425
6	209	157.931		6	209	192.707		6	209	243.034		6	209	282.034
6	210	133.098		6	210	191.772		6	210	235.238		6	210	262.848
6	211	153.771		6	211	182.642		6	211	222.201		6	211	255.587
6	212	154.069		6	212	186.967		6	212	181.785		6	212	233.787
6	213	158.804		6	213	198.32		6	213	236.784		6	213	253.75
6	214	158.52		6	214	183.227		6	214	181.358		6	214	247.005
6	215	155.112		6	215	186.841		6	215	230.325		6	215	243.231
6	216	154.949		6	216	148.438		6	216	228.261		6	216	214.784
6	217	159.782		6	217	189.565		6	217	216.907		6	217	266.201
6	218	154.755		6	218	203.531		6	218	227.894		6	218	242.656
6	219	160.061		6	219	180.186		6	219	225.468		6	219	231.189
6	220	165.314		6	220	155.969		6	220	241.062		6	220	241.975
6	221	156.556		6	221	178.573		6	221	233.802		6	221	263.112
6	222	154.972		6	222	135.791		6	222	230.218		6	222	217.983
6	223	147.322		6	223	196.389		6	223	185.933		6	223	257.233
6	224	154.496		6	224	187.956		6	224	251.622		6	224	248.869
6	225	163.29		6	225	189.202		6	225	233.709		6	225	243.911
6	226	142.87		6	226	168.979		6	226	202.193		6	226	249.596
6	227	162.993		6	227	199.436		6	227	123.292		6	227	233.76
6	228	155.675		6	228	192.603		6	228	199.163		6	228	241.673
6	229	161.605		6	229	204.078		6	229	212.323		6	229	236.675
6	230	163.51		6	230	208.678		6	230	224.246		6	230	169.709
6	231	162.598		6	231	146.633		6	231	172.393		6	231	263.484
6	232	155.897		6	232	190.145		6	232	221.145		6	232	242.331
6	233	154.495		6	233	177.88		6	233	218.739		6	233	247.993
6	234	159.801		6	234	190.271		6	234	233.036		6	234	214.869
6	235	147.328		6	235	195.496		6	235	159.363		6	235	254.081
6	236	160.565		6	236	162.805		6	236	142.454		6	236	256.966
6	237	158.321		6	237	203.097		6	237	202.788		6	237	251.342
6	238	152.311		6	238	163.466		6	238	225.231		6	238	248.054
6	239	164.862		6	239	202.457		6	239	160.33		6	239	241.945
6	240	148.462		6	240	196.7		6	240	208.586		6	240	256.803
6	241	159.403		6	241	188.564		6	241	161.961		6	241	232.874
6	242	156.256		6	242	197.084		6	242	181.402		6	242	224.377
6	243	155.645		6	243	165.216		6	243	162.009		6	243	231.647
6	244	152.766		6	244	189.74		6	244	223.89		6	244	158.322
6	245	163.228		6	245	199.37		6	245	234.319		6	245	230.87
6	246	160.992		6	246	169.172		6	246	225.191		6	246	253.201
6	247	155.287		6	247	195.49		6	247	152.992		6	247	220.888
6	248	158.804		6	248	154.908		6	248	245.785		6	248	229.935
6	249	154.4		6	249	190.211		6	249	235.077		6	249	254.702
6	250	152.491		6	250	191.251		6	250	134.198		6	250	239.801
6	251	153.039		6	251	185.863		6	251	195.164		6	251	199.4
6	252	152.475		6	252	190.173		6	252	220.933		6	252	252.418
6	253	126.899		6	253	193.544		6	253	218.731		6	253	247.622
6	254	152.965		6	254	181.846		6	254	237.003		6	254	248.011
6	255	161.873		6	255	190.718		6	255	231.651		6	255	248.242
6	256	156.276		6	256	146.182		6	256	193.72		6	256	229.888
6	257	154.133		6	257	197.233		6	257	168.733		6	257	269.031
6	258	152.784		6	258	179.6		6	258	144.323		6	258	255.359
6	259	149.357		6	259	187.954		6	259	240.576		6	259	132.915
6	260	141.578		6	260	196.022		6	260	210.15		6	260	231.674
6	261	154.696		6	261	188.52		6	261	162.25		6	261	233.106
6	262	163.139		6	262	194.533		6	262	237.655		6	262	241.356
6	263	124.977		6	263	196.377		6	263	204.295		6	263	249.072
6	264	157.438		6	264	200.063		6	264	199.596		6	264	243.929
6	265	151.129		6	265	191.851		6	265	236.259		6	265	250.822
6	266	156.526		6	266	186.28		6	266	155.728		6	266	257.665
6	267	162.921		6	267	191.074		6	267	221.832		6	267	185.753
6	268	174.591		6	268	195.178		6	268	225.672		6	268	275.569
6	269	120.393		6	269	175.913		6	269	206.488		6	269	155.326
6	270	157.652		6	270	179.804		6	270	222.463		6	270	247.12
6	271	148.786		6	271	181.046		6	271	222.724		6	271	254.862
6	272	154.824		6	272	193.019		6	272	252.706		6	272	257.149
6	273	151.202		6	273	193.518		6	273	213.968		6	273	252.555
6	274	156.939		6	274	186.477		6	274	161.482		6	274	251.199
6	275	154.915		6	275	196.62		6	275	226.279		6	275	243.474
6	276	156.778		6	276	189.393		6	276	171.686		6	276	248.592
6	277	162.044		6	277	190.419		6	277	149.773		6	277	249.031
6	278	157.762		6	278	189.874		6	278	151.665		6	278	263.887
6	279	157.022		6	279	212.738		6	279	219.93		6	279	249.654
6	280	153.478		6	280	193.687		6	280	236.239		6	280	254.635
6	281	152.273		6	281	193.985		6	281	208.045		6	281	223.132
6	282	156.057		6	282	198.683		6	282	213.937		6	282	248.727
6	283	159.035		6	283	192.472		6	283	228.901		6	283	268.852
6	284	152.606		6	284	196.196		6	284	225.923		6	284	255.5
6	285	158.293		6	285	183.409		6	285	138.303		6	285	187.435
6	286	155.384		6	286	195.217		6	286	149.792		6	286	240.731
6	287	128.692		6	287	167.379		6	287	217.711		6	287	242.834
6	288	158.4		6	288	180.376		6	288	227.298		6	288	243.49
6	289	158.766		6	289	183.34		6	289	233.007		6	289	153.871
6	290	159.83		6	290	205.37		6	290	227.261		6	290	168.284
6	291	164.323		6	291	160.523		6	291	223.968		6	291	260.924
6	292	156.468		6	292	189.19		6	292	232.151		6	292	254.614
6	293	135.864		6	293	184.937		6	293	207.922		6	293	245.562
6	294	145.187		6	294	184.207		6	294	224.233		6	294	216.735
6	295	125.12		6	295	190.386		6	295	170.249		6	295	233.105
6	296	160.985		6	296	192.492		6	296	213.794		6	296	214.134
6	297	129.256		6	297	197		6	297	233.171		6	297	242.341
6	298	142.896		6	298	189.804		6	298	185.687		6	298	248.212
6	299	158.772		6	299	198.457		6	299	228.188		6	299	235.181
7	0	159.187		7	0	184.138		7	0	226.646		7	0	255.399
7	1	121.417		7	1	193.518		7	1	227.451		7	1	225.189
7	2	128.279		7	2	194.465		7	2	216.411		7	2	179.371
7	3	153.469		7	3	188.953		7	3	220.45		7	3	199.207
7	4	153.606		7	4	180.697		7	4	221.476		7	4	223.971
7	5	160.492		7	5	185.465		7	5	225.565		7	5	247.409
7	6	138.706		7	6	194.731		7	6	163.539		7	6	222.818
7	7	153.025		7	7	187.784		7	7	239.596		7	7	200.76
7	8	158.562		7	8	190.879		7	8	230.98		7	8	236.889
7	9	162.866		7	9	161.172		7	9	214.149		7	9	241.692
7	10	156.382		7	10	188.513		7	10	221.315		7	10	239.85
7	11	159.489		7	11	188.477		7	11	222.827		7	11	246.93
7	12	158.017		7	12	203.975		7	12	250.398		7	12	216.73
7	13	160.301		7	13	194.58		7	13	226.058		7	13	230.15
7	14	146.025		7	14	184.825		7	14	216.618		7	14	240.335
7	15	155.757		7	15	191.1		7	15	220.361		7	15	257.6
7	16	158.262		7	16	188.566		7	16	227.989		7	16	245.941
7	17	118.554		7	17	183.212		7	17	228.258		7	17	234.303
7	18	155.435		7	18	186.093		7	18	342.235		7	18	252.583
7	19	159.691		7	19	196.924		7	19	342.838		7	19	241.565
7	20	157.245		7	20	192.177		7	20	222.055		7	20	231.082
7	21	155.853		7	21	214.578		7	21	233.283		7	21	233.955
7	22	159.757		7	22	181.569		7	22	197.676		7	22	249.635
7	23	156.508		7	23	184.314		7	23	135.285		7	23	237.291
7	24	163.698		7	24	193.238		7	24	224.938		7	24	253.235
7	25	152.102		7	25	192.785		7	25	153.424		7	25	170.492
7	26	156.49		7	26	185.185		7	26	218.165		7	26	178.628
7	27	151.802		7	27	175.91		7	27	227.804		7	27	235.886
7	28	154.714		7	28	182.216		7	28	233.568		7	28	239.461
7	29	162.82		7	29	194.299		7	29	180.938		7	29	250.67
7	30	159.849		7	30	190.785		7	30	227.856		7	30	218.386
7	31	158.593		7	31	186.807		7	31	192.139		7	31	250.442
7	32	161.592		7	32	143.639		7	32	197.036		7	32	220.079
7	33	159.789		7	33	189.697		7	33	220.931		7	33	250.462
7	34	161.404		7	34	197.407		7	34	296.307		7	34	234.199
7	35	156.549		7	35	177.602		7	35	157.494		7	35	234.869
7	36	162.098		7	36	192.132		7	36	220.477		7	36	247.758
7	37	165.4		7	37	193.737		7	37	158.95		7	37	223.305
7	38	155.629		7	38	199.27		7	38	229.1		7	38	246.473
7	39	157.401		7	39	198.062		7	39	217.214		7	39	272.201
7	40	157.78		7	40	193.529		7	40	212.104		7	40	211.652
7	41	148.382		7	41	188.729		7	41	244.794		7	41	255.718
7	42	156.58		7	42	195.175		7	42	230.076		7	42	248.619
7	43	157.501		7	43	184.24		7	43	232.05		7	43	240.047
7	44	149.287		7	44	161.58		7	44	187.508		7	44	253.672
7	45	141.754		7	45	194.146		7	45	217.806		7	45	236.265
7	46	159.61		7	46	186.523		7	46	232.454		7	46	233.304
7	47	162.278		7	47	202.853		7	47	175.375		7	47	254.07
7	48	152.546		7	48	179.021		7	48	223.009		7	48	250.123
7	49	158.247		7	49	194.874		7	49	225.39		7	49	245.294
7	50	160.685		7	50	175.927		7	50	210.998		7	50	254.577
7	51	163.17		7	51	190.803		7	51	233.782		7	51	232.658
7	52	159.575		7	52	147.748		7	52	226.242		7	52	243.173
7	53	158.123		7	53	159.897		7	53	222.449		7	53	252.404
7	54	152.982		7	54	150.109		7	54	210.908		7	54	233.352
7	55	159.37		7	55	195.579		7	55	221.445		7	55	253.749
7	56	157.57		7	56	139.247		7	56	178.969		7	56	233.374
7	57	157.83		7	57	160.303		7	57	227.934		7	57	241.445
7	58	156.393		7	58	202.778		7	58	198.181		7	58	206.693
7	59	161.43		7	59	189.697		7	59	230.742		7	59	241.657
7	60	161.177		7	60	197.167		7	60	227.456		7	60	252.565
7	61	161.201		7	61	181.922		7	61	220.664		7	61	259.841
7	62	152.794		7	62	191.047		7	62	227.456		7	62	238.649
7	63	160.308		7	63	186.266		7	63	228.608		7	63	258.708
7	64	160.34		7	64	184.461		7	64	222.923		7	64	149.96
7	65	156.433		7	65	188.945		7	65	213.987		7	65	248.633
7	66	156.719		7	66	187.69		7	66	239.221		7	66	244.884
7	67	148.857		7	67	191.798		7	67	225.044		7	67	244.709
7	68	158.645		7	68	214.479		7	68	162.007		7	68	211.14
7	69	154.967		7	69	163.805		7	69	162.073		7	69	167.351
7	70	155.866		7	70	191.172		7	70	158.329		7	70	242.228
7	71	152.32		7	71	188.897		7	71	229.787		7	71	252.235
7	72	163.446		7	72	174.783		7	72	175.487		7	72	235.185
7	73	163.246		7	73	190.246		7	73	147.754		7	73	241.231
7	74	129.113		7	74	202.782		7	74	153.768		7	74	250.408
7	75	159.834		7	75	195.751		7	75	220.786		7	75	248.552
7	76	127.664		7	76	192.099		7	76	225.772		7	76	236.619
7	77	156.94		7	77	201.114		7	77	242.047		7	77	233.842
7	78	160.774		7	78	187.234		7	78	220.535		7	78	196.93
7	79	157.906		7	79	187.862		7	79	228.918		7	79	254.305
7	80	157.476		7	80	189.551		7	80	233.44		7	80	255.474
7	81	158.432		7	81	193.872		7	81	339.442		7	81	182.194
7	82	152.708		7	82	184.205		7	82	174.631		7	82	214.499
7	83	157.365		7	83	191.195		7	83	232.751		7	83	214.732
7	84	128.484		7	84	192.266		7	84	220.884		7	84	247.601
7	85	156.885		7	85	188.277		7	85	220.602		7	85	249.642
7	86	136.311		7	86	166.307		7	86	223.304		7	86	245.149
7	87	140.439		7	87	198.883		7	87	224.746		7	87	241.925
7	88	153.559		7	88	194.995		7	88	227.162		7	88	253.126
7	89	156.721		7	89	189.258		7	89	162.27		7	89	242.902
7	90	200.355		7	90	194.42		7	90	222.827		7	90	242.133
7	91	157.019		7	91	194.021		7	91	220.223		7	91	227.884
7	92	150.347		7	92	191.068		7	92	228.581		7	92	248.602
7	93	159.554		7	93	191.029		7	93	236.208		7	93	245.887
7	94	137.07		7	94	199.032		7	94	235.86		7	94	246.295
7	95	139.435		7	95	181.572		7	95	228.447		7	95	218.123
7	96	153.983		7	96	187.548		7	96	200.109		7	96	236.952
7	97	131.029		7	97	194.531		7	97	223.761		7	97	245.651
7	98	157.301		7	98	162.787		7	98	257.609		7	98	250.521
7	99	155.807		7	99	208.154		7	99	229.998		7	99	236.991
7	100	170.651		7	100	195.063		7	100	225.043		7	100	248.324
7	101	157.096		7	101	170.07		7	101	157.738		7	101	240.905
7	102	127.105		7	102	191.273		7	102	218.098		7	102	242.865
7	103	156.144		7	103	183.045		7	103	219.62		7	103	256.901
7	104	161.887		7	104	186.637		7	104	174.809		7	104	257.261
7	105	156.738		7	105	186.153		7	105	236.739		7	105	248.295
7	106	156.482		7	106	135.931		7	106	138.731		7	106	246.627
7	107	161.23		7	107	193.322		7	107	221.774		7	107	258.911
7	108	157.535		7	108	125.408		7	108	232.638		7	108	273.678
7	109	161.041		7	109	196.267		7	109	226.422		7	109	246.327
7	110	154.305		7	110	191.188		7	110	142.154		7	110	192.698
7	111	161.684		7	111	193.631		7	111	224.785		7	111	202.527
7	112	154.075		7	112	154.688		7	112	229.797		7	112	195.166
7	113	123.662		7	113	201.59		7	113	229.209		7	113	226.076
7	114	153.272		7	114	204.661		7	114	237.58		7	114	245.42
7	115	161.897		7	115	199.481		7	115	217.982		7	115	241.398
7	116	158.357		7	116	142.48		7	116	245.269		7	116	245.306
7	117	160.048		7	117	188.235		7	117	236.151		7	117	233.632
7	118	161.533		7	118	173.777		7	118	226.569		7	118	251.916
7	119	170.192		7	119	197.275		7	119	216.32		7	119	251.688
7	120	157.544		7	120	171.855		7	120	142.767		7	120	212.194
7	121	159.137		7	121	190.341		7	121	225.462		7	121	258.339
7	122	158.336		7	122	194.643		7	122	222.222		7	122	247.734
7	123	164.586		7	123	196.219		7	123	206.87		7	123	240.684
7	124	159.961		7	124	154.052		7	124	221.316		7	124	241.533
7	125	157.97		7	125	186.979		7	125	149.816		7	125	281.149
7	126	158.708		7	126	190.634		7	126	220.595		7	126	183.447
7	127	159.36		7	127	184.282		7	127	224.185		7	127	257.116
7	128	156.722		7	128	188.735		7	128	221.719		7	128	244.167
7	129	161.826		7	129	150.085		7	129	217.965		7	129	258.361
7	130	160.359		7	130	192.989		7	130	219.212		7	130	220.182
7	131	153.763		7	131	197.493		7	131	226.601		7	131	239.82
7	132	161.113		7	132	190.588		7	132	149.372		7	132	170.75
7	133	163.025		7	133	191.353		7	133	308.911		7	133	243.129
7	134	159.756		7	134	179.59		7	134	213.715		7	134	252.386
7	135	160.416		7	135	163.046		7	135	216.699		7	135	250.971
7	136	160.726		7	136	191.23		7	136	221.7		7	136	243.242
7	137	159.492		7	137	180.868		7	137	227.388		7	137	235.524
7	138	155.553		7	138	182.679		7	138	223.08		7	138	237.38
7	139	159.626		7	139	191.968		7	139	230.02		7	139	235.173
7	140	157.623		7	140	150.776		7	140	222.763		7	140	251.203
7	141	158.962		7	141	179.567		7	141	223.31		7	141	234.471
7	142	156.29		7	142	199.491		7	142	223.099		7	142	268.935
7	143	160.236		7	143	178.172		7	143	232.953		7	143	215.781
7	144	163.378		7	144	141.503		7	144	230.899		7	144	263.046
7	145	187.759		7	145	195.425		7	145	223.254		7	145	275.36
7	146	149.457		7	146	185.521		7	146	231.596		7	146	244.008
7	147	156.785		7	147	192.43		7	147	227.578		7	147	254.771
7	148	138.011		7	148	185.183		7	148	163.483		7	148	246.595
7	149	156.978		7	149	200.865		7	149	228.908		7	149	250.216
7	150	158.316		7	150	197.826		7	150	220.027		7	150	244.142
7	151	131.091		7	151	185.942		7	151	145.68		7	151	242.124
7	152	157.696		7	152	183.525		7	152	214.58		7	152	250.367
7	153	170.267		7	153	183.756		7	153	157.809		7	153	247.276
7	154	156.171		7	154	192.67		7	154	234.167		7	154	238.951
7	155	162.229		7	155	138.322		7	155	156.197		7	155	248.963
7	156	159.674		7	156	182.324		7	156	141.471		7	156	195.86
7	157	154.65		7	157	182.825		7	157	222.351		7	157	217.278
7	158	160.912		7	158	188.907		7	158	227.889		7	158	251.632
7	159	155.845		7	159	199.126		7	159	216.834		7	159	244.309
7	160	157.323		7	160	227.192		7	160	239.657		7	160	252.643
7	161	156.357		7	161	169.325		7	161	168.501		7	161	249.893
7	162	160.878		7	162	135.704		7	162	224.533		7	162	234.872
7	163	154.86		7	163	182.54		7	163	232.137		7	163	239.756
7	164	158.541		7	164	177.69		7	164	225.987		7	164	246.848
7	165	144.677		7	165	196.362		7	165	229.806		7	165	203.533
7	166	168.27		7	166	171.754		7	166	230.078		7	166	238.256
7	167	116.866		7	167	184.967		7	167	219.314		7	167	245.281
7	168	159.041		7	168	192.199		7	168	225.076		7	168	255.269
7	169	161.166		7	169	160.25		7	169	212.107		7	169	237.996
7	170	157.696		7	170	186.42		7	170	142.948		7	170	219.42
7	171	147.876		7	171	149.785		7	171	223.441		7	171	138.847
7	172	161.662		7	172	172.091		7	172	167.162		7	172	245.52
7	173	128.75		7	173	200.286		7	173	210.76		7	173	190.598
7	174	162.577		7	174	193.541		7	174	223.565		7	174	231.65
7	175	159.978		7	175	180.881		7	175	240.823		7	175	228.486
7	176	200.974		7	176	186.699		7	176	229.216		7	176	200.2
7	177	159.312		7	177	199.355		7	177	219.572		7	177	251.887
7	178	154.207		7	178	166.64		7	178	221.271		7	178	248.794
7	179	162.972		7	179	194.547		7	179	193.984		7	179	227.669
7	180	157.782		7	180	185.061		7	180	173.044		7	180	255.73
7	181	122.937		7	181	192.396		7	181	235.138		7	181	244.179
7	182	167.647		7	182	196.314		7	182	218.377		7	182	243.462
7	183	131.645		7	183	151.531		7	183	226.534		7	183	249.396
7	184	162.55		7	184	201.971		7	184	219.718		7	184	256.044
7	185	158.692		7	185	200.262		7	185	221.594		7	185	245.138
7	186	159.25		7	186	161.664		7	186	221.066		7	186	248.574
7	187	166.85		7	187	163.431		7	187	162.53		7	187	244.962
7	188	158.155		7	188	190.963		7	188	183.284		7	188	252.102
7	189	159.092		7	189	185.753		7	189	251.057		7	189	243.359
7	190	158.884		7	190	167.349		7	190	141.08		7	190	231.515
7	191	143.489		7	191	146.993		7	191	195.893		7	191	226.65
7	192	162.925		7	192	187.88		7	192	273.155		7	192	270.531
7	193	156.381		7	193	188.141		7	193	234.867		7	193	256.348
7	194	161.661		7	194	191.473		7	194	233.643		7	194	241.013
7	195	138.533		7	195	149.863		7	195	217.811		7	195	214.408
7	196	158.972		7	196	172.283		7	196	215.459		7	196	245.416
[truncated: 7,003 more rows]

## Sheet: Experiment_chain
Experiment	chain fitting
398 nm				501 nm				599 nm				658 nm
video_id	frame_id	estimated length		video_id	frame_id	estimated length		video_id	frame_id	estimated length		video_id	frame_id	estimated length
1	0	360.976		1	0	468.912		1	0	539.144		1	0	664.777
1	1	369.025		1	1	474.673		1	1	579.09		1	1	689.362
1	2	450.253		1	2	471.279		1	2	573.743		1	2	564.25
1	3	391.695		1	3	451.921		1	3	542.404		1	3	619.592
1	4	350.065		1	4	496.196		1	4	566.062		1	4	653.147
1	5	404.051		1	5	473.392		1	5	562.789		1	5	622.402
1	6	420.379		1	6	479.628		1	6	593.726		1	6	619.614
1	7	431.68		1	7	483.849		1	7	568.818		1	7	635.846
1	8	400.76		1	8	461.81		1	8	570.482		1	8	621.898
1	9	358.466		1	9	449.717		1	9	529.25		1	9	618.253
1	10	359.051		1	10	444.587		1	10	598.645		1	10	550.062
1	11	407.794		1	11	461.772		1	11	560.365		1	11	626.291
1	12	395.142		1	12	456.827		1	12	546.59		1	12	615.216
1	13	407.866		1	13	460.196		1	13	566.109		1	13	601.06
1	14	355.978		1	14	516.006		1	14	557.074		1	14	668.627
1	15	341.79		1	15	452.231		1	15	561.029		1	15	671.343
1	16	434.313		1	16	456.53		1	16	564.077		1	16	642.029
1	17	429.523		1	17	448.009		1	17	545.759		1	17	624.26
1	18	423.396		1	18	477.348		1	18	581.641		1	18	638.577
1	19	468.297		1	19	513.159		1	19	599.884		1	19	635.433
1	20	444.793		1	20	478.657		1	20	558.304		1	20	655.085
1	21	430.984		1	21	449.096		1	21	554.448		1	21	692.99
1	22	406.777		1	22	459.997		1	22	559.386		1	22	690.541
1	23	404.751		1	23	476.033		1	23	515.032		1	23	608.775
1	24	449.11		1	24	503.484		1	24	564.029		1	24	616.329
1	25	441.008		1	25	481.946		1	25	543.505		1	25	612.338
1	26	410.726		1	26	453.582		1	26	598.385		1	26	687.736
1	27	393.661		1	27	467.995		1	27	574.71		1	27	610.578
1	28	425.17		1	28	468.856		1	28	592.391		1	28	602.185
1	29	413.705		1	29	456.523		1	29	593.04		1	29	641.991
1	30	367.466		1	30	430.113		1	30	578.77		1	30	636.618
1	31	368.011		1	31	475.673		1	31	563.568		1	31	629.866
1	32	365.204		1	32	457.139		1	32	545.697		1	32	648.609
1	33	400.414		1	33	469.377		1	33	551.888		1	33	624.165
1	34	449.373		1	34	473.168		1	34	543.968		1	34	603.816
1	35	421.832		1	35	446.452		1	35	522.092		1	35	602.271
1	36	412.095		1	36	441.976		1	36	579.729		1	36	633.965
1	37	386.569		1	37	463.833		1	37	632.527		1	37	641.571
1	38	376.13		1	38	452.225		1	38	531.493		1	38	623.574
1	39	409.073		1	39	513.524		1	39	553.341		1	39	602.873
1	40	441.906		1	40	483.493		1	40	572.487		1	40	632.766
1	41	399.372		1	41	458.812		1	41	574.117		1	41	623.864
1	42	413.65		1	42	461.214		1	42	541.973		1	42	639.731
1	43	385.406		1	43	440.177		1	43	571.895		1	43	656.064
1	44	419.923		1	44	407.641		1	44	558.055		1	44	585.068
1	45	454.665		1	45	438.902		1	45	531.996		1	45	630.116
1	46	372.262		1	46	483.35		1	46	592.921		1	46	630.229
1	47	420.083		1	47	491.651		1	47	584.332		1	47	655.167
1	48	428.482		1	48	502.691		1	48	582.724		1	48	572.308
1	49	432.463		1	49	429.938		1	49	581.501		1	49	602.354
1	50	378.91		1	50	470.006		1	50	579.842		1	50	674.339
1	51	407.242		1	51	430.071		1	51	572.539		1	51	677.005
1	52	418.889		1	52	480.967		1	52	561.495		1	52	611.78
1	53	404.279		1	53	461.604		1	53	557.608		1	53	634.901
1	54	354.965		1	54	454.861		1	54	515.196		1	54	622.509
1	55	379.597		1	55	473.249		1	55	556.387		1	55	638.989
1	56	387.388		1	56	454.871		1	56	552.488		1	56	632.939
1	57	417.394		1	57	455.522		1	57	559.764		1	57	645.719
1	58	408.289		1	58	478.241		1	58	558.232		1	58	654.548
1	59	383.602		1	59	436.251		1	59	613.741		1	59	627.211
1	60	360.018		1	60	468.118		1	60	548.286		1	60	584.432
1	61	385.784		1	61	441.636		1	61	578.852		1	61	575.966
1	62	387.391		1	62	435.578		1	62	589.173		1	62	631.793
1	63	430.466		1	63	468.475		1	63	592.326		1	63	626.386
1	64	398.338		1	64	446.486		1	64	581.238		1	64	636.986
1	65	383.626		1	65	478.528		1	65	575.174		1	65	646.866
1	66	377.811		1	66	448.506		1	66	586.959		1	66	633.138
1	67	366.512		1	67	480.122		1	67	582.929		1	67	626.602
1	68	374.316		1	68	462.22		1	68	530.528		1	68	598.754
1	69	395.369		1	69	458.46		1	69	528.797		1	69	628.52
1	70	375.525		1	70	467.937		1	70	580.79		1	70	622.121
1	71	398.501		1	71	425.809		1	71	590.548		1	71	611.29
1	72	349.439		1	72	442.517		1	72	603.683		1	72	646.606
1	73	380.833		1	73	477.563		1	73	616.166		1	73	669.661
1	74	393.041		1	74	488.126		1	74	609.351		1	74	684.668
1	75	409.394		1	75	495.338		1	75	546.041		1	75	614.253
1	76	415.449		1	76	508.818		1	76	508.241		1	76	611.428
1	77	439.136		1	77	446.906		1	77	528.134		1	77	590.721
1	78	370.6		1	78	470.197		1	78	571.454		1	78	567.384
1	79	428.704		1	79	446.056		1	79	597.382		1	79	646.089
1	80	358.693		1	80	443.376		1	80	585.37		1	80	633.356
1	81	425.052		1	81	432.745		1	81	565.587		1	81	630.282
1	82	327.158		1	82	507.564		1	82	544.431		1	82	636.93
1	83	381.86		1	83	455.639		1	83	557.667		1	83	602.85
1	84	384.468		1	84	395.801		1	84	578.495		1	84	630.665
1	85	389.367		1	85	445.251		1	85	583.395		1	85	553.66
1	86	424.915		1	86	430.986		1	86	533.138		1	86	592.633
1	87	393.756		1	87	432.748		1	87	553.777		1	87	579.92
1	88	415.12		1	88	466.813		1	88	566.777		1	88	629.175
1	89	390.94		1	89	465.687		1	89	584.108		1	89	636.353
1	90	399.99		1	90	471.675		1	90	562.808		1	90	624.191
1	91	395.127		1	91	491.718		1	91	590.122		1	91	628.279
1	92	437.205		1	92	437.173		1	92	522.636		1	92	638.302
1	93	427.534		1	93	442.289		1	93	557.006		1	93	643.126
1	94	403.598		1	94	464.548		1	94	575.672		1	94	616.168
1	95	415.695		1	95	485.994		1	95	555.181		1	95	633.586
1	96	391.596		1	96	456.754		1	96	531.176		1	96	638.21
1	97	374.838		1	97	485.105		1	97	565.101		1	97	594.713
1	98	386.994		1	98	477.771		1	98	524.868		1	98	655.88
1	99	377.542		1	99	397.276		1	99	557.634		1	99	626.934
1	100	384.484		1	100	420.145		1	100	554.476		1	100	620.422
1	101	395.145		1	101	410.162		1	101	575.52		1	101	645.483
1	102	394.701		1	102	438.181		1	102	540.61		1	102	670.602
1	103	360.407		1	103	474.367		1	103	514.584		1	103	563.817
1	104	425.583		1	104	448.858		1	104	581.809		1	104	618.933
1	105	417.539		1	105	438.762		1	105	546.94		1	105	643.997
1	106	411.879		1	106	455.067		1	106	555.304		1	106	679.815
1	107	432.958		1	107	473.386		1	107	555.815		1	107	638.991
1	108	367.405		1	108	462.438		1	108	544.858		1	108	619.273
1	109	397.503		1	109	447.051		1	109	556.675		1	109	649.23
1	110	365.822		1	110	471.698		1	110	552.777		1	110	628.746
1	111	410.041		1	111	463.623		1	111	585.159		1	111	687.581
1	112	449.212		1	112	469.288		1	112	549.797		1	112	638.669
1	113	427.698		1	113	454.024		1	113	569.79		1	113	613.816
1	114	408.484		1	114	443.505		1	114	564.406		1	114	648.122
1	115	375.237		1	115	435.359		1	115	546.535		1	115	622.248
1	116	393.344		1	116	469.893		1	116	517.99		1	116	631.421
1	117	402.332		1	117	432.994		1	117	587.3		1	117	666.592
1	118	316.167		1	118	452.11		1	118	569.987		1	118	675.985
1	119	414.094		1	119	462.419		1	119	558.394		1	119	630.13
1	120	397.317		1	120	442.442		1	120	542.274		1	120	635.804
1	121	421.121		1	121	432.655		1	121	572.365		1	121	629.77
1	122	392.494		1	122	419.116		1	122	557.717		1	122	626.238
1	123	388.505		1	123	436.391		1	123	572.689		1	123	598.6
1	124	427.68		1	124	437.94		1	124	585.407		1	124	657.162
1	125	360.831		1	125	427.272		1	125	619.311		1	125	639.701
1	126	455.966		1	126	460.382		1	126	526.37		1	126	635.763
1	127	409.816		1	127	483.199		1	127	592.877		1	127	606.312
1	128	386.223		1	128	459.196		1	128	560.108		1	128	616.121
1	129	430.708		1	129	519.548		1	129	617.096		1	129	675.406
1	130	420.984		1	130	455.421		1	130	571.515		1	130	615.235
1	131	402.549		1	131	441.002		1	131	553.794		1	131	610.69
1	132	420.884		1	132	495.569		1	132	544.339		1	132	620.978
1	133	409.349		1	133	442.813		1	133	587.341		1	133	635.726
1	134	374.089		1	134	443.72		1	134	596.065		1	134	638.826
1	135	399.6		1	135	447.495		1	135	587.337		1	135	588.737
1	136	349.183		1	136	472.104		1	136	553.563		1	136	621.709
1	137	410.901		1	137	466.254		1	137	542.613		1	137	650.976
1	138	375.143		1	138	440.043		1	138	585.869		1	138	645.823
1	139	374.473		1	139	433.029		1	139	586.331		1	139	632
1	140	396.16		1	140	454.137		1	140	587.117		1	140	622.079
1	141	344.029		1	141	434.144		1	141	545.968		1	141	621.659
1	142	416.625		1	142	456.61		1	142	557.582		1	142	668.874
1	143	444.809		1	143	478.026		1	143	555.025		1	143	659.837
1	144	438.484		1	144	460.811		1	144	561.988		1	144	601.839
1	145	421.45		1	145	432.39		1	145	573.2		1	145	591.488
1	146	392.61		1	146	444.117		1	146	595.395		1	146	663.158
1	147	382.342		1	147	460.579		1	147	611.975		1	147	613.423
1	148	386.174		1	148	468.649		1	148	575.354		1	148	620.599
1	149	417.524		1	149	515.375		1	149	594.242		1	149	601.434
1	150	381.038		1	150	451.367		1	150	555.427		1	150	667.564
1	151	430.641		1	151	474.543		1	151	588.524		1	151	643.213
1	152	413.477		1	152	471.805		1	152	571.793		1	152	633.005
1	153	397.743		1	153	432.016		1	153	583.687		1	153	630.618
1	154	420.607		1	154	446.051		1	154	591.434		1	154	591.531
1	155	370.898		1	155	468.418		1	155	591.798		1	155	633.669
1	156	321.068		1	156	481.861		1	156	583.186		1	156	638.332
1	157	381.025		1	157	463.124		1	157	552.807		1	157	594.737
1	158	369.063		1	158	442.535		1	158	540.276		1	158	653.392
1	159	353.254		1	159	449.745		1	159	594.392		1	159	630.932
1	160	419.636		1	160	425.9		1	160	536.824		1	160	622.115
1	161	407.836		1	161	446.547		1	161	580.091		1	161	612.613
1	162	389.955		1	162	388.379		1	162	563.164		1	162	642.887
1	163	432.923		1	163	414.535		1	163	578.394		1	163	596.776
1	164	402.85		1	164	455.777		1	164	555.867		1	164	612.075
1	165	376.766		1	165	458.318		1	165	528.77		1	165	588.511
1	166	359.667		1	166	449.702		1	166	549.341		1	166	640.037
1	167	425.45		1	167	465.9		1	167	534.785		1	167	647.005
1	168	389.174		1	168	449.91		1	168	556.605		1	168	648.949
1	169	417.836		1	169	432.599		1	169	542.1		1	169	642.75
1	170	359.411		1	170	406.662		1	170	585.682		1	170	669.913
1	171	414.378		1	171	421.101		1	171	505.569		1	171	688.223
1	172	413.253		1	172	451.801		1	172	590.466		1	172	656.273
1	173	414.981		1	173	454.477		1	173	578.242		1	173	665.258
1	174	386.455		1	174	446.473		1	174	545.594		1	174	646.516
1	175	428.17		1	175	428.344		1	175	543.686		1	175	619.247
1	176	459.888		1	176	447.544		1	176	563.86		1	176	625.219
1	177	385.796		1	177	454.721		1	177	585.017		1	177	655.51
1	178	380.417		1	178	476.843		1	178	556.874		1	178	651
1	179	422.433		1	179	514.739		1	179	558.692		1	179	637.312
1	180	365.195		1	180	481.431		1	180	563.051		1	180	626.861
1	181	402.582		1	181	464.979		1	181	550.593		1	181	648.429
1	182	410.164		1	182	439.055		1	182	575.613		1	182	636.854
1	183	414.277		1	183	446.359		1	183	551.622		1	183	600.003
1	184	435.27		1	184	449.106		1	184	564.721		1	184	642.471
1	185	439.276		1	185	456.082		1	185	592.494		1	185	628.893
1	186	388.966		1	186	463.806		1	186	576.825		1	186	632.701
1	187	428.541		1	187	434.187		1	187	597.512		1	187	639.727
1	188	419.07		1	188	453.832		1	188	571.131		1	188	634.953
1	189	392.275		1	189	480.855		1	189	554.724		1	189	601.328
1	190	411.922		1	190	484.747		1	190	602.151		1	190	624.341
1	191	380.599		1	191	437.377		1	191	519.969		1	191	634.398
1	192	404.365		1	192	446.653		1	192	541.982		1	192	623.015
1	193	392.788		1	193	440.542		1	193	551.233		1	193	657.301
1	194	408.408		1	194	449.075		1	194	546.167		1	194	629.001
1	195	391.626		1	195	428.308		1	195	559.772		1	195	628.997
1	196	362.361		1	196	391.508		1	196	559.635		1	196	655.901
1	197	371.512		1	197	443.061		1	197	559.699		1	197	615.757
1	198	403.492		1	198	451.463		1	198	501.066		1	198	676.504
1	199	394.964		1	199	484.032		1	199	517.449		1	199	665.944
1	200	397.366		1	200	450.244		1	200	591.016		1	200	654.358
1	201	394.789		1	201	434.93		1	201	529.015		1	201	649.084
1	202	371.184		1	202	435.444		1	202	567.331		1	202	617.255
1	203	353.077		1	203	448.598		1	203	543.021		1	203	631.636
1	204	328.663		1	204	449.021		1	204	539.666		1	204	659.054
1	205	366.647		1	205	483.949		1	205	551.091		1	205	650.699
1	206	404.421		1	206	441.911		1	206	557.084		1	206	668.399
1	207	422.651		1	207	469.239		1	207	571.299		1	207	658.019
1	208	450.107		1	208	479.335		1	208	627.308		1	208	645.659
1	209	413.23		1	209	473.65		1	209	612.529		1	209	631.711
1	210	408.253		1	210	479.481		1	210	572.562		1	210	582.825
1	211	376.834		1	211	475.26		1	211	547.594		1	211	615.392
1	212	310.772		1	212	460.175		1	212	561.054		1	212	650.772
1	213	380.56		1	213	393.316		1	213	535.953		1	213	645.85
1	214	382.345		1	214	464.557		1	214	542.727		1	214	638.968
1	215	425.05		1	215	476.794		1	215	566.96		1	215	636.558
1	216	421.226		1	216	467.226		1	216	545.027		1	216	669.492
1	217	391.536		1	217	440.064		1	217	549.776		1	217	651.482
1	218	387.427		1	218	442.906		1	218	542.933		1	218	656.642
1	219	360.64		1	219	375.614		1	219	559.724		1	219	668.85
1	220	399.843		1	220	471.66		1	220	589.237		1	220	636.849
1	221	445.533		1	221	420.821		1	221	577.677		1	221	648.614
1	222	406.244		1	222	453.55		1	222	523.705		1	222	666.639
1	223	392.684		1	223	459.393		1	223	583.613		1	223	617.796
1	224	391.898		1	224	457.253		1	224	556.971		1	224	686.083
1	225	411.176		1	225	468.354		1	225	543.619		1	225	680.455
1	226	354.954		1	226	462.782		1	226	541.495		1	226	628.966
1	227	346.801		1	227	470.099		1	227	573.214		1	227	631.13
1	228	451.924		1	228	460.432		1	228	614.45		1	228	681.823
1	229	415.858		1	229	450.27		1	229	576.678		1	229	663.524
1	230	387.535		1	230	444.011		1	230	559.208		1	230	655
1	231	401.275		1	231	440.391		1	231	499.525		1	231	654.556
1	232	432.677		1	232	478.777		1	232	506.026		1	232	650.107
1	233	404.844		1	233	440.066		1	233	508.303		1	233	626.366
1	234	389.003		1	234	464.496		1	234	545.828		1	234	657.721
1	235	397.54		1	235	444.992		1	235	566.45		1	235	622.546
1	236	441.108		1	236	477.85		1	236	562.048		1	236	677.865
1	237	426.569		1	237	441.721		1	237	572.184		1	237	646.706
1	238	398.935		1	238	471.173		1	238	599.917		1	238	654.616
1	239	389.997		1	239	425.047		1	239	564.602		1	239	637.527
1	240	378.166		1	240	479.979		1	240	543.635		1	240	622.175
1	241	401.962		1	241	447.912		1	241	603.355		1	241	613.954
1	242	374.808		1	242	485.996		1	242	597.347		1	242	603.977
1	243	397.398		1	243	426.708		1	243	564.849		1	243	656.998
1	244	388.078		1	244	456.465		1	244	527.282		1	244	620.448
1	245	441.98		1	245	465.506		1	245	574.238		1	245	645.95
1	246	421.207		1	246	440.351		1	246	532.804		1	246	637.215
1	247	403.886		1	247	460.078		1	247	553.413		1	247	645.371
1	248	348.609		1	248	464.593		1	248	543.119		1	248	601.326
1	249	419.202		1	249	506.372		1	249	589.391		1	249	639.283
1	250	391.434		1	250	465.503		1	250	581.65		1	250	610.933
1	251	385.836		1	251	441.675		1	251	574.865		1	251	615.65
1	252	388.274		1	252	426.274		1	252	572.957		1	252	636.44
1	253	383.769		1	253	444.655		1	253	515.871		1	253	642.705
1	254	398.061		1	254	453.635		1	254	561.079		1	254	638.334
1	255	425.472		1	255	459.83		1	255	557.902		1	255	619.414
1	256	394.377		1	256	451.119		1	256	540.775		1	256	631.542
1	257	387.918		1	257	468.261		1	257	538.355		1	257	615.076
1	258	431.029		1	258	428.32		1	258	562.605		1	258	684.071
1	259	423.568		1	259	411.872		1	259	619.982		1	259	589.432
1	260	389.107		1	260	417.292		1	260	600.914		1	260	634.794
1	261	398.833		1	261	457.425		1	261	527.905		1	261	645.985
1	262	462.663		1	262	442.189		1	262	552.262		1	262	620.36
1	263	425.14		1	263	386.579		1	263	563.454		1	263	603.081
1	264	351.872		1	264	458.931		1	264	596.654		1	264	643.332
1	265	383.317		1	265	457.115		1	265	559.15		1	265	609.409
1	266	419.318		1	266	500.927		1	266	567.514		1	266	628.358
1	267	397.163		1	267	489.011		1	267	552.409		1	267	577.1
1	268	381.403		1	268	455.077		1	268	524.84		1	268	648.756
1	269	445.199		1	269	476.155		1	269	559.096		1	269	643.186
1	270	403.893		1	270	422.314		1	270	551.87		1	270	619.485
1	271	400.36		1	271	406.958		1	271	557.31		1	271	650.321
1	272	408.487		1	272	454.371		1	272	567.801		1	272	642.635
1	273	413.112		1	273	444.316		1	273	588.542		1	273	619.206
1	274	396.442		1	274	467.503		1	274	591.771		1	274	630.341
1	275	383.283		1	275	455.303		1	275	558.68		1	275	653.329
1	276	353.989		1	276	477.399		1	276	560.587		1	276	626.927
1	277	372.533		1	277	429.379		1	277	583.662		1	277	626.671
1	278	426.136		1	278	474.296		1	278	561.682		1	278	589.157
1	279	381.741		1	279	433.722		1	279	561.573		1	279	627.546
1	280	371.548		1	280	462.302		1	280	520.89		1	280	652.417
1	281	375.235		1	281	474.014		1	281	536.055		1	281	639.62
1	282	439.19		1	282	435.459		1	282	572.535		1	282	625.497
1	283	375.571		1	283	438.805		1	283	559.709		1	283	647.563
1	284	412.512		1	284	444.313		1	284	561.167		1	284	654.28
1	285	428.794		1	285	439.421		1	285	535.832		1	285	619.947
1	286	369.626		1	286	475.483		1	286	587.989		1	286	591.587
1	287	432.162		1	287	451.303		1	287	577.258		1	287	647.369
1	288	408.971		1	288	486.696		1	288	554.843		1	288	656.187
1	289	417.39		1	289	401.727		1	289	532.397		1	289	603.518
1	290	452.98		1	290	469.769		1	290	588.596		1	290	640.624
1	291	441.651		1	291	478.912		1	291	568.355		1	291	673.095
1	292	412.188		1	292	461.364		1	292	591.675		1	292	614.959
1	293	372.798		1	293	520.239		1	293	543.5		1	293	621.802
1	294	414.141		1	294	463.027		1	294	588.389		1	294	638.339
1	295	406.143		1	295	444.964		1	295	579.252		1	295	621.129
1	296	391.216		1	296	455.254		1	296	557.766		1	296	622.621
1	297	437.039		1	297	413.256		1	297	547.316		1	297	604.769
1	298	459.243		1	298	429.973		1	298	569.268		1	298	607.336
1	299	417.3		1	299	490.718		1	299	567.399		1	299	624.851
1	300	367.932		1	300	453.278		1	300	620.44		1	300	623.347
1	301	420.254		1	301	460.46		1	301	576.322		1	301	621.286
1	302	411.639		1	302	473.479		1	302	573.124		1	302	629.717
1	303	414.627		1	303	469.703		1	303	504.731		1	303	605.116
1	304	325.592		1	304	469.675		1	304	552.225		1	304	624.466
1	305	377.187		1	305	420.869		1	305	579.484		1	305	635.337
1	306	424.79		1	306	423.726		1	306	541.831		1	306	564.139
1	307	461.652		1	307	398.903		1	307	550.462		1	307	647.864
1	308	431.899		1	308	467.766		1	308	539.121		1	308	636.336
1	309	323.199		1	309	451.901		1	309	563.597		1	309	654.111
1	310	387.733		1	310	461.192		1	310	565.187		1	310	684.754
1	311	414.263		1	311	487.31		1	311	533.413		1	311	636.226
1	312	455.751		1	312	492.54		1	312	599.06		1	312	652.064
1	313	401.432		1	313	489.837		1	313	594.884		1	313	651.079
1	314	422.975		1	314	452.003		1	314	568.029		1	314	612.501
1	315	415.512		1	315	454.76		1	315	591.079		1	315	621.383
1	316	429.622		1	316	494.301		1	316	579.316		1	316	622.181
1	317	378.257		1	317	452.45		1	317	568.283		1	317	619.449
1	318	417.917		1	318	427.742		1	318	578.233		1	318	684.725
1	319	420.425		1	319	433.262		1	319	573.338		1	319	632.47
1	320	417.56		1	320	453.271		1	320	510.468		1	320	644.156
1	321	416.231		1	321	445.775		1	321	566.501		1	321	616.137
1	322	475.176		1	322	455.017		1	322	575.432		1	322	612.753
1	323	412.904		1	323	436.189		1	323	602.5		1	323	637.048
1	324	441.536		1	324	464.521		1	324	559.418		1	324	615.183
1	325	423.907		1	325	418.598		1	325	563.501		1	325	585.069
1	326	376.932		1	326	434.575		1	326	554.223		1	326	638.653
1	327	401.535		1	327	458.989		1	327	501.922		1	327	629.739
1	328	426.895		1	328	449.311		1	328	555.359		1	328	614.291
1	329	401.629		1	329	495.207		1	329	540.709		1	329	658.912
1	330	395.424		1	330	449.991		1	330	547.325		1	330	671.13
1	331	434.583		1	331	440.911		1	331	571.091		1	331	662.734
1	332	447.372		1	332	450.166		1	332	574.42		1	332	646.935
1	333	367.019		1	333	446.76		1	333	537.276		1	333	678.21
1	334	415.263		1	334	443.075		1	334	554.717		1	334	642.521
1	335	359.338		1	335	451.296		1	335	592.99		1	335	609.974
1	336	400.312		1	336	483.764		2	0	564.759		1	336	605.61
1	337	410.766		1	337	425.769		2	1	554.643		1	337	612.61
1	338	411.512		1	338	457.261		2	2	554.522		1	338	624.383
1	339	449.619		2	0	515.648		2	3	557.813		2	0	556.866
1	340	363.18		2	1	480.023		2	4	553.903		2	1	592.09
1	341	437.498		2	2	436.031		2	5	573.766		2	2	628.081
1	342	427.395		2	3	468.885		2	6	633.494		2	3	553.107
1	343	421.242		2	4	467.032		2	7	565.539		2	4	569.796
1	344	400.89		2	5	459.215		2	8	544.818		2	5	578.593
1	345	413.147		2	6	506.176		2	9	628.188		2	6	598.433
1	346	446.397		2	7	497.837		2	10	563.476		2	7	598.933
1	347	412.861		2	8	456.093		2	11	547.565		2	8	598.144
1	348	408.443		2	9	468.818		2	12	586.231		2	9	618.389
1	349	383.491		2	10	467.546		2	13	555.28		2	10	584.41
1	350	385.922		2	11	498.638		2	14	592.943		2	11	590.51
1	351	368.824		2	12	454.216		2	15	542.582		2	12	610.743
1	352	364.923		2	13	506.739		2	16	574.064		2	13	571.812
1	353	390.615		2	14	468.705		2	17	578.87		2	14	595.081
1	354	367.748		2	15	513.184		2	18	580.655		2	15	587.683
1	355	397.232		2	16	498.997		2	19	626.526		2	16	603.689
1	356	408.627		2	17	447.781		2	20	574.936		2	17	604.465
1	357	439.373		2	18	458.181		2	21	573.334		2	18	519.362
1	358	419.532		2	19	488.953		2	22	541.468		2	19	582.611
2	0	426.929		2	20	475.022		2	23	538.329		2	20	583.715
2	1	401.376		2	21	485.813		2	24	594.441		2	21	570.597
2	2	423.032		2	22	471.36		2	25	595.107		2	22	551.345
2	3	434.427		2	23	512.825		2	26	563.298		2	23	605.6
2	4	416.65		2	24	479.667		2	27	601.383		2	24	622.383
2	5	384.649		2	25	489.271		2	28	576.136		2	25	574.105
2	6	440.494		2	26	508.636		2	29	592.595		2	26	574.691
2	7	384.2		2	27	485.319		2	30	541.464		2	27	602.563
2	8	416.672		2	28	446.966		2	31	576.243		2	28	589.051
2	9	441.068		2	29	478.987		2	32	587.004		2	29	577.558
2	10	442.2		2	30	469.606		2	33	555.457		2	30	552.418
2	11	364.527		2	31	458.923		2	34	578.672		2	31	584.503
2	12	370.875		2	32	474.929		2	35	604.249		2	32	564.678
2	13	404.25		2	33	480.981		2	36	609.657		2	33	579.243
2	14	420.211		2	34	500.344		2	37	579.376		2	34	572.44
2	15	382.338		2	35	487.918		2	38	608.447		2	35	554.927
2	16	418.249		2	36	450.615		2	39	552.822		2	36	554.743
2	17	440.482		2	37	456.716		2	40	575.166		2	37	594.369
2	18	420.281		2	38	470.769		2	41	565.883		2	38	575.705
2	19	437.08		2	39	475.633		2	42	583.961		2	39	593.4
2	20	435.174		2	40	472.267		2	43	577.453		2	40	586.41
2	21	436.372		2	41	488.158		2	44	542.995		2	41	578.852
2	22	407.598		2	42	512.133		2	45	556.615		2	42	520.159
2	23	436.279		2	43	493.379		2	46	589.639		2	43	607.074
2	24	379.166		2	44	502.494		2	47	599.516		2	44	587.556
2	25	393.499		2	45	466.914		2	48	572.015		2	45	561.584
2	26	435.214		2	46	472.025		2	49	584.931		2	46	561.419
2	27	395.963		2	47	483.089		2	50	509.379		2	47	553.094
2	28	417.474		2	48	471.581		2	51	554.819		2	48	580.288
2	29	442.818		2	49	449.676		2	52	604.12		2	49	621.591
2	30	444.187		2	50	484.825		2	53	545.67		2	50	565.526
2	31	453.938		2	51	465.109		2	54	562.43		2	51	570.811
2	32	414.115		2	52	458.512		2	55	548.381		2	52	597.914
2	33	398.187		2	53	472.635		2	56	566.267		2	53	595.369
2	34	409.131		2	54	483.85		2	57	564.451		2	54	575.166
2	35	417.813		2	55	490.518		2	58	554.901		2	55	631.507
2	36	389.382		2	56	474.985		2	59	552.413		2	56	560.621
2	37	401.994		2	57	481.674		2	60	582.73		2	57	588.253
2	38	437.043		2	58	468.546		2	61	549.772		2	58	605.917
2	39	442.255		2	59	518.518		2	62	564.257		2	59	595.85
2	40	441.246		2	60	494.068		2	63	612.908		2	60	559.049
2	41	430.748		2	61	502.807		2	64	594.856		2	61	546.264
2	42	425.389		2	62	460.437		2	65	586.456		2	62	598.999
2	43	455.912		2	63	466.128		2	66	564.282		2	63	606.639
2	44	406.146		2	64	433.564		2	67	521.601		2	64	557.313
2	45	425.42		2	65	462.271		2	68	554.797		2	65	608.193
2	46	415.821		2	66	486.555		2	69	573.653		2	66	571.616
2	47	385.909		2	67	437.18		2	70	601.429		2	67	599.453
2	48	419.939		2	68	496.787		2	71	586.944		2	68	612.134
2	49	426.02		2	69	499.169		2	72	581.739		2	69	619.06
2	50	395.133		2	70	479.18		2	73	564.732		2	70	642.534
2	51	397.036		2	71	478.164		2	74	544.818		2	71	568.558
2	52	437.925		2	72	497.536		2	75	605.194		2	72	572.624
2	53	352.565		2	73	443.395		2	76	593.058		2	73	598.994
2	54	407.76		2	74	475.42		2	77	601.823		2	74	624.499
2	55	377.596		2	75	451.519		2	78	545.451		2	75	608.721
2	56	430.612		2	76	458.376		2	79	511.74		2	76	609.971
2	57	398.195		2	77	486.536		2	80	587.557		2	77	563.645
2	58	419.603		2	78	506.084		2	81	593.997		2	78	557.482
2	59	349.627		2	79	524.218		2	82	564.168		2	79	579.954
2	60	366.846		2	80	481.67		2	83	565.673		2	80	599.892
2	61	397.794		2	81	459.169		2	84	594.476		2	81	602.701
2	62	396.524		2	82	459.271		2	85	580.146		2	82	568.928
2	63	436.857		2	83	498.679		2	86	574.044		2	83	574.281
2	64	404.232		2	84	475.394		2	87	576.34		2	84	595.959
2	65	430.352		2	85	461.002		2	88	532.991		2	85	536.297
2	66	415.132		2	86	523.755		2	89	610.824		2	86	562.492
2	67	406.052		2	87	472.189		2	90	528.371		2	87	580.397
2	68	381.26		2	88	498.467		2	91	548.577		2	88	574.396
2	69	405.583		2	89	476.89		2	92	588.727		2	89	561.06
2	70	428.653		2	90	489.819		2	93	569.888		2	90	543.033
2	71	426.52		2	91	487.832		2	94	582.401		2	91	531.804
2	72	400.743		2	92	455.54		2	95	541.681		2	92	546.38
2	73	405.008		2	93	468.52		2	96	519.15		2	93	599.899
2	74	400.719		2	94	494.709		2	97	587.58		2	94	572.091
2	75	407.412		2	95	440.501		2	98	619.605		2	95	595.301
2	76	414.482		2	96	483.998		2	99	601.831		2	96	564.845
2	77	437.39		2	97	468.727		2	100	639.496		2	97	561.689
2	78	424.732		2	98	447.771		2	101	549.922		2	98	593.246
2	79	436.141		2	99	457.809		2	102	604.344		2	99	576.993
2	80	398.068		2	100	457.286		2	103	621.553		2	100	585.148
2	81	392.504		2	101	440.962		2	104	566.968		2	101	594.52
2	82	434.752		2	102	470.67		2	105	558.503		2	102	598.972
2	83	404.889		2	103	442.126		2	106	559.379		2	103	548.318
2	84	422.829		2	104	457.407		2	107	611.832		2	104	536.574
2	85	405.986		2	105	484.844		2	108	631.421		2	105	547.003
2	86	460.693		2	106	435.523		2	109	568.278		2	106	635.415
2	87	377.788		2	107	505.179		2	110	596.713		2	107	596.962
2	88	412.711		2	108	456.289		2	111	596.6		2	108	590.124
2	89	413.771		2	109	465.861		2	112	557.235		2	109	589.781
2	90	419.726		2	110	455.149		2	113	594.279		2	110	586.133
2	91	407.421		2	111	497.495		2	114	562.848		2	111	576.457
2	92	382.468		2	112	475.48		2	115	586.176		2	112	546.147
2	93	394.668		2	113	474.877		2	116	616.721		2	113	533.021
2	94	433.442		2	114	455.714		2	117	560.31		2	114	556.134
2	95	399.052		2	115	464.406		2	118	543.954		2	115	576.329
2	96	405.229		2	116	464.465		2	119	612.134		2	116	558.505
2	97	415.284		2	117	434.001		2	120	579.938		2	117	586.11
2	98	462.35		2	118	468.52		2	121	593.703		2	118	615.663
2	99	395.759		2	119	446.253		2	122	605.198		2	119	562.026
2	100	446.91		2	120	488.461		2	123	579.81		2	120	579.128
2	101	424.009		2	121	444.97		2	124	588.216		2	121	633.894
2	102	425.559		2	122	443.836		2	125	597.93		2	122	569.302
2	103	424.747		2	123	452.485		2	126	549.38		2	123	583.791
2	104	383.432		2	124	487.268		2	127	595.512		2	124	624.469
2	105	410.135		2	125	460.31		2	128	563.952		2	125	571.496
2	106	422.048		2	126	492.811		2	129	562.9		2	126	529.06
2	107	411.815		2	127	478.578		2	130	563.379		2	127	531.008
2	108	457.912		2	128	470.701		2	131	561.892		2	128	614.527
2	109	404.642		2	129	496.464		2	132	552.919		2	129	571.824
2	110	424.423		2	130	473.749		2	133	576.923		2	130	568.501
2	111	408.547		2	131	482.009		2	134	542.073		2	131	599.94
2	112	411.241		2	132	467.97		2	135	622.333		2	132	608.177
2	113	439.904		2	133	467.816		2	136	577.675		2	133	621.832
2	114	411.763		2	134	467.118		2	137	607.051		2	134	600.136
2	115	405.953		2	135	450.04		2	138	552.845		2	135	583.421
2	116	432.748		2	136	412.884		2	139	568.667		2	136	623.013
2	117	414.323		2	137	482.592		2	140	579.23		2	137	592.771
2	118	428.401		2	138	507.432		2	141	591.909		2	138	618.448
2	119	383.105		2	139	463.747		2	142	555.51		2	139	545.309
2	120	429.065		2	140	485.731		2	143	575.929		2	140	574.816
2	121	441.496		2	141	464.051		2	144	580.42		2	141	575.464
2	122	394.597		2	142	446.811		2	145	625.51		2	142	581.64
2	123	394.455		2	143	468.998		2	146	604.517		2	143	571.567
2	124	407.066		2	144	467.352		2	147	507.285		2	144	586.615
2	125	443.231		2	145	472.92		2	148	541.529		2	145	581.975
2	126	396.532		2	146	500.004		2	149	556.418		2	146	570.264
2	127	388.047		2	147	504.498		2	150	549.122		2	147	587.028
2	128	355.281		2	148	496.123		2	151	593.714		2	148	572.645
2	129	445.235		2	149	509.074		2	152	534.656		2	149	605.404
2	130	382.839		2	150	487.154		2	153	562.575		2	150	592.77
2	131	420.26		2	151	479.468		2	154	547.199		2	151	565.406
2	132	429.932		2	152	449.635		2	155	534.494		2	152	627.873
2	133	405.582		2	153	476.275		2	156	568.807		2	153	602.09
2	134	410.211		2	154	502.11		2	157	566.806		2	154	577.151
2	135	436.017		2	155	460.785		2	158	577.369		2	155	589.755
2	136	445.137		2	156	453.314		2	159	556.951		2	156	602.554
2	137	395.159		2	157	453.861		2	160	539.389		2	157	571.486
2	138	380.272		2	158	499.007		2	161	558.099		2	158	589.142
2	139	389.336		2	159	443.777		2	162	610.141		2	159	589.384
2	140	437.371		2	160	494.142		2	163	549.838		2	160	567.02
2	141	421.152		2	161	463.972		2	164	612.751		2	161	595.505
2	142	400.301		2	162	536.77		2	165	594.433		2	162	570.92
2	143	441.559		2	163	493.689		2	166	570.349		2	163	566.28
2	144	402.858		2	164	502.628		2	167	601.558		2	164	600.928
2	145	408.517		2	165	514.111		2	168	595.895		2	165	583.568
2	146	439.364		2	166	499.875		2	169	547.076		2	166	598.982
2	147	411.174		2	167	476.643		2	170	565.296		2	167	567.062
2	148	387.844		2	168	460.445		2	171	589.594		2	168	577.304
2	149	384.71		2	169	512.391		2	172	567.183		2	169	532.682
2	150	431.395		2	170	475.211		2	173	588.071		2	170	574.656
2	151	378.685		2	171	477.448		2	174	553.679		2	171	607.338
2	152	416.855		2	172	471.496		2	175	561.64		2	172	577.56
2	153	382.07		2	173	497.386		2	176	529.327		2	173	517.61
2	154	410.259		2	174	429.928		2	177	605.116		2	174	582.267
2	155	423.107		2	175	487.656		2	178	507.841		2	175	569.6
2	156	434.472		2	176	462.708		2	179	470.321		2	176	566.333
2	157	422.425		2	177	468.749		2	180	557.307		2	177	581.164
2	158	465.504		2	178	486.057		2	181	576.275		2	178	574.707
2	159	408.085		2	179	488.411		2	182	537.393		2	179	596.093
2	160	412.362		2	180	491.156		2	183	594.105		2	180	533.438
2	161	387.605		2	181	486.883		2	184	609.461		2	181	562.986
2	162	416.853		2	182	446.177		2	185	576.673		2	182	588.998
2	163	400.898		2	183	487.134		2	186	526.435		2	183	590.898
2	164	446.064		2	184	504.32		2	187	554.706		2	184	560.788
2	165	397.018		2	185	454.815		2	188	559.831		2	185	601.914
2	166	402.821		2	186	461.089		2	189	583.014		2	186	566.793
2	167	416.136		2	187	462.751		2	190	622.437		2	187	559.531
2	168	416.906		2	188	518.369		2	191	587.387		2	188	556.381
2	169	435.799		2	189	436.384		2	192	575.596		2	189	598.809
2	170	379.064		2	190	468.416		2	193	573.895		2	190	576.947
2	171	414.529		2	191	462.234		2	194	484.093		2	191	606.611
2	172	419.93		2	192	457.051		2	195	499.135		2	192	600.337
2	173	421.58		2	193	468.73		2	196	544.3		2	193	604.504
2	174	455.585		2	194	477.025		2	197	592.126		2	194	595.342
2	175	419.924		2	195	513.804		2	198	570.769		2	195	613.282
2	176	417.063		2	196	502.529		2	199	594.321		2	196	541.768
2	177	410.832		2	197	509.811		2	200	563.923		2	197	590.98
2	178	454.403		2	198	506.522		2	201	553.737		2	198	607.067
2	179	416.916		2	199	516.85		2	202	599.954		2	199	613.523
2	180	410.872		2	200	445.732		2	203	588.069		2	200	601.994
2	181	375.805		2	201	478.426		2	204	601.382		2	201	605.08
2	182	412.44		2	202	484.051		2	205	565.441		2	202	617.227
2	183	462.173		2	203	457.483		2	206	537.812		2	203	628.935
2	184	383.589		2	204	468.244		2	207	571.895		2	204	578.648
2	185	398.143		2	205	482.07		2	208	575.595		2	205	610.041
2	186	399.026		2	206	469.132		2	209	543.749		2	206	601.268
2	187	416.062		2	207	472.034		2	210	559.753		2	207	577.583
2	188	427.967		2	208	470.696		2	211	581.262		2	208	587.383
2	189	422.856		2	209	460.081		2	212	595.469		2	209	570.613
2	190	419.524		2	210	511.748		2	213	554.062		2	210	551.582
2	191	402.799		2	211	475.963		2	214	560.529		2	211	608.727
2	192	439.901		2	212	437.612		2	215	566.482		2	212	566.649
2	193	450.81		2	213	483.197		2	216	572.745		2	213	579.487
2	194	416.746		2	214	472.551		2	217	557.535		2	214	571.171
2	195	412.614		2	215	505.011		2	218	593.418		2	215	571.764
2	196	432.506		2	216	506.727		2	219	584.549		2	216	541.028
2	197	446.84		2	217	472.613		2	220	560.505		2	217	552.102
2	198	400.523		2	218	500.055		2	221	568.083		2	218	578.091
2	199	433.657		2	219	439.972		2	222	570.198		2	219	561.946
2	200	432.669		2	220	494.612		2	223	582.256		2	220	601.384
2	201	439.98		2	221	491.259		2	224	557.924		2	221	601.707
2	202	409.441		2	222	481.838		2	225	526.78		2	222	632.545
2	203	385.049		2	223	467.884		2	226	564.183		2	223	579.55
2	204	398.593		2	224	489.86		2	227	550.371		2	224	524.13
2	205	391.892		2	225	468.402		2	228	583.144		2	225	585.912
2	206	413.073		2	226	498.219		2	229	629.765		2	226	590.135
2	207	406.886		2	227	522.807		2	230	520.796		2	227	602.769
2	208	442.796		2	228	460.016		2	231	536.979		2	228	544.573
2	209	373.038		2	229	480.222		2	232	577.576		2	229	535.227
2	210	425.374		2	230	464.324		2	233	564.669		2	230	594.96
2	211	400.762		2	231	522.795		2	234	587.266		2	231	619.158
2	212	433.129		2	232	470.043		2	235	565.342		2	232	584.007
2	213	363.215		2	233	493.172		2	236	553.889		2	233	557.949
2	214	379.327		2	234	507.952		2	237	563.067		2	234	593.038
2	215	357.97		2	235	469.933		2	238	559.145		2	235	580.447
2	216	406.097		2	236	474.457		2	239	544.173		2	236	588.806
2	217	405.96		2	237	463.038		2	240	574.372		2	237	598.571
2	218	413.264		2	238	496.868		2	241	563.972		2	238	579.711
2	219	428.15		2	239	468.928		2	242	575.596		2	239	607.433
2	220	429.728		2	240	480.172		2	243	611.509		2	240	620
2	221	408.426		2	241	479.91		2	244	600.753		2	241	606.938
2	222	376.388		2	242	472.376		2	245	580.203		2	242	564.653
2	223	433.536		2	243	463.508		2	246	573.371		2	243	579.505
2	224	416.126		2	244	423.06		2	247	569.604		2	244	533.183
2	225	413.405		2	245	436.531		2	248	604.551		2	245	584.754
2	226	400.939		2	246	484.308		2	249	580.512		2	246	589.717
2	227	414.893		2	247	505.752		2	250	569.832		2	247	595.199
2	228	399.637		2	248	493.752		2	251	598.341		2	248	592.77
2	229	450.774		2	249	476.49		2	252	561.355		2	249	598.058
2	230	458.479		2	250	463.093		2	253	540.827		2	250	586.902
2	231	451.383		2	251	468.452		2	254	564.203		2	251	573.557
2	232	401.028		2	252	507.763		2	255	538.765		2	252	538.173
2	233	419.059		2	253	490.103		2	256	621.048		2	253	593.098
2	234	419.717		2	254	451.706		2	257	607.972		2	254	599.476
2	235	414.963		2	255	488.466		2	258	559.599		2	255	621.12
2	236	457.591		2	256	488.679		2	259	559.568		2	256	552.568
2	237	413.589		2	257	494.133		2	260	624.378		2	257	561.921
2	238	413.543		2	258	486.749		2	261	573.103		2	258	593.212
2	239	443.93		2	259	451.448		2	262	476.81		2	259	644.701
2	240	468.428		2	260	484.786		2	263	579.445		2	260	595.795
2	241	390.781		2	261	457.62		2	264	608.555		2	261	573.388
2	242	373.094		2	262	466.874		2	265	623.897		2	262	556.842
2	243	434.97		2	263	474.356		2	266	584.897		2	263	586.103
2	244	452.48		2	264	478.105		2	267	527.218		2	264	585.682
2	245	422.48		2	265	490.089		2	268	548.434		2	265	599.185
2	246	486.876		2	266	485.31		2	269	603.296		2	266	625.812
2	247	439.142		2	267	442.366		2	270	590.463		2	267	603.978
2	248	402.009		2	268	467.084		2	271	571.184		2	268	567.87
2	249	412.674		2	269	407.134		2	272	572.009		2	269	546.097
2	250	413.701		2	270	461.002		2	273	534.45		2	270	580.782
2	251	433.772		2	271	452.664		2	274	605.193		2	271	601.314
2	252	418.678		2	272	519.111		2	275	563.478		2	272	579.874
2	253	367.831		2	273	463.78		2	276	572.306		2	273	579.983
2	254	422.434		2	274	477.846		2	277	564.939		2	274	616.552
2	255	440.13		2	275	460.173		2	278	627.904		2	275	580.567
2	256	432.982		2	276	460.477		2	279	584.521		2	276	563.292
2	257	437.155		2	277	498.873		2	280	576.425		2	277	573.795
2	258	437.983		2	278	481.124		2	281	600.359		2	278	591.159
2	259	417.075		2	279	467.379		2	282	569.365		2	279	597.157
2	260	456.406		2	280	473.456		2	283	550.962		2	280	577.241
2	261	468.806		2	281	511.42		2	284	570.7		2	281	582.259
2	262	432.482		2	282	510.783		2	285	559.508		2	282	580.539
2	263	427.016		2	283	470.907		2	286	540.088		2	283	570.914
2	264	374.286		2	284	484.694		2	287	595.004		2	284	564.539
2	265	413.267		2	285	445.752		2	288	583.297		2	285	595.578
2	266	430.948		2	286	437.652		2	289	560.84		2	286	599.556
2	267	413.481		2	287	476.638		2	290	604.136		2	287	578.324
2	268	426.601		2	288	494.156		2	291	540.894		2	288	577.182
2	269	458.507		2	289	482.647		2	292	570.599		2	289	591.87
2	270	424.157		2	290	481.853		2	293	553.075		2	290	588.035
2	271	418.79		2	291	475.004		2	294	560.351		2	291	596.182
2	272	400.589		2	292	465.916		2	295	583.503		2	292	590.147
2	273	410.422		2	293	455.855		2	296	533.698		2	293	580.85
2	274	448.264		2	294	496.17		2	297	577.647		2	294	615.348
2	275	413.103		2	295	460.421		2	298	562.096		2	295	586.702
2	276	434.532		2	296	465.208		2	299	611.587		2	296	560.909
2	277	438.673		2	297	444.109		2	300	514.758		2	297	601.794
2	278	441.581		2	298	460.626		2	301	583.483		2	298	591.316
2	279	442.248		2	299	497.597		2	302	586.804		2	299	585.091
2	280	418.629		2	300	504.076		2	303	591.926		2	300	586.833
2	281	417.544		2	301	473.008		2	304	624.524		2	301	589.937
2	282	417.796		2	302	459.211		2	305	596.553		2	302	592.791
2	283	436.814		2	303	494.065		2	306	604.633		2	303	591.077
2	284	445.372		2	304	472.57		2	307	587.33		2	304	605.751
2	285	392.522		2	305	485.258		2	308	597.939		2	305	583.5
2	286	450.683		2	306	459.817		2	309	563.912		2	306	588.024
2	287	427.781		2	307	471.341		2	310	593.24		2	307	567.453
2	288	443.692		2	308	471.641		2	311	580.61		2	308	560.72
2	289	429.398		2	309	485.436		2	312	547.915		2	309	555.717
2	290	454.245		2	310	487.952		2	313	591.575		2	310	583.072
2	291	427.204		2	311	470.179		2	314	591.273		2	311	579.369
2	292	423.221		2	312	464.384		2	315	585.081		2	312	562.128
2	293	426.556		2	313	469.461		2	316	591.616		2	313	613.385
2	294	426.35		2	314	495.178		2	317	615.737		2	314	581.722
2	295	452.012		2	315	453.785		2	318	554.996		2	315	589.328
2	296	447.381		2	316	457.194		2	319	521.936		2	316	578.575
2	297	418.751		2	317	452.437		2	320	570.301		2	317	576.67
2	298	440.781		2	318	459.614		2	321	581.61		2	318	619.485
2	299	422.54		2	319	483.337		2	322	576.174		2	319	611.974
2	300	395.471		2	320	479.812		2	323	616.005		2	320	553.549
2	301	402.141		2	321	478.555		2	324	591.969		2	321	571.304
2	302	419.469		2	322	491.44		2	325	625.429		2	322	573.069
2	303	399.123		2	323	433.282		2	326	568.809		2	323	609.55
2	304	404.846		2	324	497.671		2	327	621.853		2	324	585.4
2	305	398.643		2	325	448.623		2	328	542.025		2	325	608.016
2	306	394.702		2	326	462.199		2	329	586.126		2	326	605.808
2	307	370.366		2	327	474.898		2	330	574.868		2	327	609.405
2	308	398.178		2	328	439.482		2	331	613.77		2	328	586.245
2	309	396.534		2	329	492.618		2	332	629.758		2	329	627.42
2	310	434.851		2	330	483.066		2	333	531.587		2	330	589.332
2	311	406.351		2	331	466.669		2	334	544.966		2	331	581.899
2	312	390.316		2	332	482.772		2	335	639.364		2	332	596.328
2	313	417.772		2	333	478.62		2	336	588.387		2	333	600.33
2	314	408.986		2	334	505.403		2	337	580.053		2	334	620.421
2	315	419.319		2	335	473.867		2	338	518.905		2	335	611.281
2	316	405.121		2	336	485.304		2	339	601.38		3	0	633.117
2	317	412.448		2	337	466.909		2	340	576.233		3	1	633.145
2	318	443.309		2	338	464.713		3	0	609.353		3	2	677.898
2	319	417.004		3	0	404.673		3	1	530.095		3	3	642.958
2	320	417.978		3	1	411.881		3	2	518.007		3	4	648.942
2	321	429.903		3	2	433.991		3	3	564.093		3	5	641.72
2	322	432.259		3	3	447.978		3	4	566.385		3	6	631.745
2	323	471.93		3	4	427.034		3	5	510.015		3	7	639.384
2	324	441.511		3	5	475.845		3	6	537.469		3	8	571.68
2	325	417.364		3	6	464.362		3	7	508.878		3	9	644.542
2	326	436		3	7	425.414		3	8	547.663		3	10	620.912
2	327	428.369		3	8	360.496		3	9	531.491		3	11	581.809
2	328	428.744		3	9	455.033		3	10	571.366		3	12	633.682
2	329	389.321		3	10	460.944		3	11	566.168		3	13	643.443
2	330	443.606		3	11	415.992		3	12	580.994		3	14	627.254
2	331	475.271		3	12	463.871		3	13	629.69		3	15	625.167
2	332	454.377		3	13	456.658		3	14	578.934		3	16	611.089
2	333	435.478		3	14	502.793		3	15	535.519		3	17	605.345
2	334	413.721		3	15	443.739		3	16	530.991		3	18	621.867
2	335	441.079		3	16	460.7		3	17	564.094		3	19	601.696
2	336	444.014		3	17	412.631		3	18	578.995		3	20	605.148
2	337	465.901		3	18	439.542		3	19	553.566		3	21	647.95
2	338	422.396		3	19	405.053		3	20	574.26		3	22	613.085
2	339	374.986		3	20	427.568		3	21	549.114		3	23	626.49
2	340	400.754		3	21	500.562		3	22	523.817		3	24	648.316
3	0	346.614		3	22	473.397		3	23	518.703		3	25	614.812
3	1	385.087		3	23	471.655		3	24	538.846		3	26	564.697
3	2	333.772		3	24	447.173		3	25	575.168		3	27	584.384
3	3	386.762		3	25	447.874		3	26	607.006		3	28	603.711
3	4	396.431		3	26	464.882		3	27	555.454		3	29	651.455
3	5	358.259		3	27	466.346		3	28	569.623		3	30	624.897
3	6	368.925		3	28	459.013		3	29	531.251		3	31	586.411
3	7	372.746		3	29	432.654		3	30	606.035		3	32	613.676
3	8	369.391		3	30	464.981		3	31	557.723		3	33	662.01
3	9	374.299		3	31	466.409		3	32	559.387		3	34	649.763
3	10	375.554		3	32	394.428		3	33	546.794		3	35	608.155
3	11	383.933		3	33	438.429		3	34	548.346		3	36	615.799
3	12	352.988		3	34	471.885		3	35	547.623		3	37	642.262
3	13	361.569		3	35	474.179		3	36	524.773		3	38	625.654
3	14	355.606		3	36	448.103		3	37	574.392		3	39	639.304
3	15	366.258		3	37	433.365		3	38	584.871		3	40	650.724
3	16	343.501		3	38	455.285		3	39	529.559		3	41	644.033
3	17	372.613		3	39	459.899		3	40	594.683		3	42	623.029
3	18	368.249		3	40	417.272		3	41	624.86		3	43	606.713
3	19	373.441		3	41	457.091		3	42	584.615		3	44	586.662
3	20	346.429		3	42	435.922		3	43	559.972		3	45	629.771
3	21	376.821		3	43	468.401		3	44	535.003		3	46	607.753
3	22	347.954		3	44	480.371		3	45	566.774		3	47	621.476
3	23	375.898		3	45	500.745		3	46	634.577		3	48	603.312
3	24	366.899		3	46	442.823		3	47	572.35		3	49	610.404
3	25	336.321		3	47	441.929		3	48	574.698		3	50	629.837
3	26	363.709		3	48	394.411		3	49	522.868		3	51	607.329
3	27	332.113		3	49	468.829		3	50	558.589		3	52	576.172
3	28	393.889		3	50	422.316		3	51	598.216		3	53	592.696
3	29	347.265		3	51	475.059		3	52	562.645		3	54	644.004
3	30	339.486		3	52	388.454		3	53	572.125		3	55	656.821
3	31	367.243		3	53	435.261		3	54	576.927		3	56	669.144
3	32	331.941		3	54	450.53		3	55	579.864		3	57	586.245
3	33	333.214		3	55	429.422		3	56	589.506		3	58	609.007
3	34	335.757		3	56	466.022		3	57	596.789		3	59	630.627
3	35	349.05		3	57	411.524		3	58	578.507		3	60	624.636
3	36	340.014		3	58	438.709		3	59	587.462		3	61	659.523
3	37	393.635		3	59	440.957		3	60	536.471		3	62	586.21
3	38	361.891		3	60	476.464		3	61	552.532		3	63	626.754
3	39	346.033		3	61	463.411		3	62	539.933		3	64	639.456
3	40	389.963		3	62	446.761		3	63	558.755		3	65	630.641
3	41	351.682		3	63	417.593		3	64	539.087		3	66	617.563
3	42	333.619		3	64	459.18		3	65	558.863		3	67	675.332
3	43	375.582		3	65	491.505		3	66	602.465		3	68	653.475
3	44	368.725		3	66	462.643		3	67	581.644		3	69	623.042
3	45	315.734		3	67	435.381		3	68	637.468		3	70	590.121
3	46	395.74		3	68	415.125		3	69	565.819		3	71	645.114
3	47	321.334		3	69	400.425		3	70	538.126		3	72	617.413
3	48	393.374		3	70	429.865		3	71	516.584		3	73	630.692
3	49	308.552		3	71	461.034		3	72	607.262		3	74	588.652
3	50	352.553		3	72	495.347		3	73	531.124		3	75	587.223
3	51	369.156		3	73	436.895		3	74	582.46		3	76	600.723
3	52	390.543		3	74	397.136		3	75	636.901		3	77	637.359
3	53	347.542		3	75	424.786		3	76	609.286		3	78	602.92
3	54	351.433		3	76	413.692		3	77	616.123		3	79	604.809
3	55	378.695		3	77	402.974		3	78	587.397		3	80	631.645
3	56	387.178		3	78	427.759		3	79	542.731		3	81	644.157
3	57	336.896		3	79	443.029		3	80	603.894		3	82	588.09
3	58	350.902		3	80	414.839		3	81	544.935		3	83	642.328
3	59	380.264		3	81	426.877		3	82	551.006		3	84	628.287
3	60	385.048		3	82	448.127		3	83	554.544		3	85	626.473
3	61	391.897		3	83	474.438		3	84	591.611		3	86	627.007
3	62	359.422		3	84	450.765		3	85	601.612		3	87	670.71
3	63	325.349		3	85	476.442		3	86	539.015		3	88	647.309
3	64	358.403		3	86	451.797		3	87	538.089		3	89	673.678
3	65	361.833		3	87	408.133		3	88	558.359		3	90	641.254
3	66	383.97		3	88	427.634		3	89	584.762		3	91	615.706
3	67	359.105		3	89	434.389		3	90	577.639		3	92	638.136
3	68	375.672		3	90	443.626		3	91	569.8		3	93	644.177
3	69	362.974		3	91	446.504		3	92	576.417		3	94	628.421
3	70	370.644		3	92	438.267		3	93	522.001		3	95	659.46
3	71	342.953		3	93	428.443		3	94	569.707		3	96	598.054
3	72	356.012		3	94	436.818		3	95	545.372		3	97	623.57
3	73	368.038		3	95	452.493		3	96	557.378		3	98	626.823
3	74	348.036		3	96	414.992		3	97	552.077		3	99	656.009
3	75	345.414		3	97	408.342		3	98	602.463		3	100	610.138
3	76	376.764		3	98	455.674		3	99	549.617		3	101	614.637
3	77	385.262		3	99	441.714		3	100	463.586		3	102	666.136
3	78	391.621		3	100	410.743		3	101	538.17		3	103	629.848
3	79	404.231		3	101	439.479		3	102	579.419		3	104	645.783
3	80	407.435		3	102	490.477		3	103	533.828		3	105	651.571
3	81	363.623		3	103	465.133		3	104	559.483		3	106	601.57
3	82	379.004		3	104	441.243		3	105	540.42		3	107	616.801
3	83	347.053		3	105	446.105		3	106	598.219		3	108	624.384
3	84	362.306		3	106	471.149		3	107	575.327		3	109	630.773
3	85	369.208		3	107	410.901		3	108	547.401		3	110	668.121
3	86	354.769		3	108	481.116		3	109	512.638		3	111	612.383
3	87	380.975		3	109	467.842		3	110	517.472		3	112	662.656
3	88	341.852		3	110	455.692		3	111	564.624		3	113	630.133
3	89	393.701		3	111	446.038		3	112	582.826		3	114	619.805
3	90	376.774		3	112	467.433		3	113	555.334		3	115	653.429
3	91	358.379		3	113	462.933		3	114	547.773		3	116	625.388
3	92	366.538		3	114	484.288		3	115	661.14		3	117	635.074
3	93	343.526		3	115	437.196		3	116	636.674		3	118	594.383
3	94	373.189		3	116	429.276		3	117	590.637		3	119	619.619
3	95	344.791		3	117	435.2		3	118	530.143		3	120	676.421
3	96	403.218		3	118	475.425		3	119	574.014		3	121	598.653
3	97	394.521		3	119	433.492		3	120	600.951		3	122	625.395
3	98	348.606		3	120	454.02		3	121	549.225		3	123	613.2
3	99	333.805		3	121	445.188		3	122	584.351		3	124	602.101
3	100	361.713		3	122	458.702		3	123	556.817		3	125	595.654
3	101	401.299		3	123	441.296		3	124	625.739		3	126	673.308
3	102	361.663		3	124	368.255		3	125	583.426		3	127	623.82
3	103	362.385		3	125	425.117		3	126	605.608		3	128	634.851
3	104	356.111		3	126	441.69		3	127	612.94		3	129	663.514
3	105	336.461		3	127	460.956		3	128	581.538		3	130	680.962
3	106	333.356		3	128	458.017		3	129	632.127		3	131	622.806
3	107	373.359		3	129	455.598		3	130	582.35		3	132	632.511
3	108	363.347		3	130	398.402		3	131	582.509		3	133	635.567
3	109	352.347		3	131	443.329		3	132	588.239		3	134	617.529
3	110	358.163		3	132	438.833		3	133	600.656		3	135	627.453
3	111	321.397		3	133	401.512		3	134	609.038		3	136	612.797
3	112	342.407		3	134	455.652		3	135	595.141		3	137	612.308
3	113	325.507		3	135	454.427		3	136	599.274		3	138	660.103
3	114	354.123		3	136	479.374		3	137	609.18		3	139	611.509
3	115	372.009		3	137	465.533		3	138	606.774		3	140	566.269
3	116	374.875		3	138	486.137		3	139	579.905		3	141	606.726
3	117	343.119		3	139	409.36		3	140	535.486		3	142	548.427
3	118	374.931		3	140	453.827		3	141	631.21		3	143	603.373
3	119	363.968		3	141	470.477		3	142	567.54		3	144	620.435
3	120	342.65		3	142	495.666		3	143	534.818		3	145	662.6
3	121	375.97		3	143	464.611		3	144	609.372		3	146	635.353
3	122	365.746		3	144	455.318		3	145	646.459		3	147	655.902
3	123	363.282		3	145	460.163		3	146	582.453		3	148	654.927
3	124	342.566		3	146	450.844		3	147	570.177		3	149	579.341
3	125	368.679		3	147	463.461		3	148	582.728		3	150	600.397
3	126	361.735		3	148	424.865		3	149	581.842		3	151	637.621
3	127	384.835		3	149	437.459		3	150	567.775		3	152	600.081
3	128	310.394		3	150	452.267		3	151	521.322		3	153	540.227
3	129	352.683		3	151	456.632		3	152	558.84		3	154	595.928
3	130	351.697		3	152	408.387		3	153	606.904		3	155	576.134
3	131	325.335		3	153	436.706		3	154	535.148		3	156	615.595
3	132	347.62		3	154	475.366		3	155	544.333		3	157	632.731
3	133	379.763		3	155	450.451		3	156	562.837		3	158	623.269
3	134	380.247		3	156	452.452		3	157	603.753		3	159	634.881
3	135	378.494		3	157	459.832		3	158	615.185		3	160	630.062
3	136	327.651		3	158	447.926		3	159	635.32		3	161	569.369
3	137	338.625		3	159	438.523		3	160	642.013		3	162	647.267
3	138	334.104		3	160	447.697		3	161	524.126		3	163	608.34
3	139	331.19		3	161	420.855		3	162	523.175		3	164	626.733
3	140	352.315		3	162	451.426		3	163	538.387		3	165	607.125
3	141	375.91		3	163	448.551		3	164	497.58		3	166	626.859
3	142	371.136		3	164	446.088		3	165	546.85		3	167	661.455
3	143	352.73		3	165	423.852		3	166	557.89		3	168	609.561
3	144	314.397		3	166	429.842		3	167	599.026		3	169	648.695
3	145	364.113		3	167	500.36		3	168	525.752		3	170	614.242
3	146	362.01		3	168	481.924		3	169	594.621		3	171	599.461
3	147	372.802		3	169	423.371		3	170	570.547		3	172	574.409
3	148	327.249		3	170	427.071		3	171	591.415		3	173	637.936
3	149	321.177		3	171	473.694		3	172	552.409		3	174	594.355
3	150	340.616		3	172	465.214		3	173	544.163		3	175	650.537
3	151	367.11		3	173	424.813		3	174	555.437		3	176	627.481
3	152	355.033		3	174	473.839		3	175	551.786		3	177	610.383
3	153	391.438		3	175	414.681		3	176	553.616		3	178	645.968
3	154	338.185		3	176	463.286		3	177	527.341		3	179	663.664
3	155	389.846		3	177	479.609		3	178	536.278		3	180	614.141
3	156	337.617		3	178	460.01		3	179	556.321		3	181	646.803
3	157	342.802		3	179	497.18		3	180	533.778		3	182	616.84
3	158	372.612		3	180	458.716		3	181	490.689		3	183	638.06
3	159	365.129		3	181	502.566		3	182	570.966		3	184	650.476
3	160	323.686		3	182	436.711		3	183	523.924		3	185	598.195
3	161	311.405		3	183	440.141		3	184	588.091		3	186	617.124
3	162	380.211		3	184	454.358		3	185	601.018		3	187	633.938
3	163	347.772		3	185	427.175		3	186	601.868		3	188	634.956
3	164	347.756		3	186	433.285		3	187	571.121		3	189	632.956
3	165	400.349		3	187	411.167		3	188	583.369		3	190	622.904
3	166	383.193		3	188	439.654		3	189	580.992		3	191	643.15
3	167	331.799		3	189	462.87		3	190	542.888		3	192	635.847
3	168	335.139		3	190	453.579		3	191	554.701		3	193	614.53
3	169	353.867		3	191	476.531		3	192	534.002		3	194	632.187
3	170	341.637		3	192	482.107		3	193	495.749		3	195	617.105
3	171	296.509		3	193	438.699		3	194	519.188		3	196	611.306
3	172	342.35		3	194	402.495		3	195	565.266		3	197	606.353
3	173	354.221		3	195	438.819		3	196	565.25		3	198	657.575
3	174	349.244		3	196	452.244		3	197	591.263		3	199	650.046
3	175	384.327		3	197	370.224		3	198	574.604		3	200	599.891
3	176	370.887		3	198	459.78		3	199	586.23		3	201	631.745
3	177	393.792		3	199	455.511		3	200	536.524		3	202	628.575
3	178	363.547		3	200	422.838		3	201	541.649		3	203	592.186
3	179	380.678		3	201	430.131		3	202	594.371		3	204	602.948
3	180	382.937		3	202	453.461		3	203	567.426		3	205	600.84
3	181	338.608		3	203	425.321		3	204	621.318		3	206	600.873
3	182	354.584		3	204	444.821		3	205	567.734		3	207	640.937
3	183	308.69		3	205	391.768		3	206	587.15		3	208	634.457
3	184	329.403		3	206	420.562		3	207	572.561		3	209	649.443
3	185	387.527		3	207	445.348		3	208	572.015		3	210	618.993
3	186	376.461		3	208	430.431		3	209	562.175		3	211	598.368
3	187	351.715		3	209	387.715		3	210	582.177		3	212	619.763
3	188	352.063		3	210	411.26		3	211	525.911		3	213	624.009
3	189	344.522		3	211	454.207		3	212	584.026		3	214	603.89
3	190	330.369		3	212	439.185		3	213	579.457		3	215	639.287
3	191	331.275		3	213	416.403		3	214	548.535		3	216	590.52
3	192	329.159		3	214	425.516		3	215	565.28		3	217	628.845
3	193	340.513		3	215	460.116		3	216	517.298		3	218	605.548
3	194	358.035		3	216	472.076		3	217	587.738		3	219	672.606
3	195	357.926		3	217	402.291		3	218	581.866		3	220	570.167
3	196	360.91		3	218	438.502		3	219	524.745		3	221	628.706
3	197	331.61		3	219	465.813		3	220	606.396		3	222	634.361
3	198	329.194		3	220	461.473		3	221	548.489		3	223	660.502
3	199	354.784		3	221	455.595		3	222	572.62		3	224	642.636
3	200	353.615		3	222	469.579		3	223	537.972		3	225	647.701
3	201	368.22		3	223	471.616		3	224	571.616		3	226	647.981
3	202	352.187		3	224	392.44		3	225	558.136		3	227	589.171
3	203	335.467		3	225	441.793		3	226	581.201		3	228	609.348
3	204	375.572		3	226	471.892		3	227	601.696		3	229	652.789
3	205	325.539		3	227	436.825		3	228	612.183		3	230	639.138
3	206	337.306		3	228	432.866		3	229	593.126		3	231	661.114
3	207	347.661		3	229	437.699		3	230	597.47		3	232	586.239
3	208	363.12		3	230	438.945		3	231	559.114		3	233	660.643
3	209	372.649		3	231	462.771		3	232	589.151		3	234	627.473
3	210	348.283		3	232	419.443		3	233	590.406		3	235	619.834
3	211	338.243		3	233	437.453		3	234	586.413		3	236	622.98
3	212	346.64		3	234	433.971		3	235	535.777		3	237	621.014
3	213	343.684		3	235	432.153		3	236	565.904		3	238	622.147
3	214	353.623		3	236	447.166		3	237	596.838		3	239	643.68
3	215	314.145		3	237	428.988		3	238	591.689		3	240	587.594
3	216	342.67		3	238	446.866		3	239	544.72		3	241	598.848
3	217	346.833		3	239	400.439		3	240	555.098		3	242	650.578
3	218	353.535		3	240	398.44		3	241	560.372		3	243	692.548
3	219	372.331		3	241	476.864		3	242	559.241		3	244	690.932
3	220	361.114		3	242	459.055		3	243	584.274		3	245	662.84
3	221	365.121		3	243	441.178		3	244	577.568		3	246	624.355
3	222	330.196		3	244	431.552		3	245	531.812		3	247	627.64
3	223	343.798		3	245	483.412		3	246	491.481		3	248	575.137
3	224	340.061		3	246	491.88		3	247	611.231		3	249	608.155
3	225	315.156		3	247	530.929		3	248	622.71		3	250	628.989
3	226	353.374		3	248	423.31		3	249	578.413		3	251	639.547
3	227	360.25		3	249	411.846		3	250	623.714		3	252	646.957
3	228	390.401		3	250	458.399		3	251	626.989		3	253	619.781
3	229	321.209		3	251	483.008		3	252	618.182		3	254	596.911
3	230	405.245		3	252	450.622		3	253	521.625		3	255	606.715
3	231	368.78		3	253	444.561		3	254	512.495		3	256	579.864
3	232	302.219		3	254	432.957		3	255	506.576		3	257	602.544
3	233	366.901		3	255	454.85		3	256	541.71		3	258	602.275
3	234	346.084		3	256	443.165		3	257	518.227		3	259	674.107
3	235	396.249		3	257	424.653		3	258	551.895		3	260	685.294
3	236	317.877		3	258	460.947		3	259	560.775		3	261	636.976
3	237	377.807		3	259	466.3		3	260	552.684		3	262	622.444
3	238	335.267		3	260	411.072		3	261	655.625		3	263	645.92
3	239	357.052		3	261	389.949		3	262	566.601		3	264	637.051
3	240	363.049		3	262	396.598		3	263	614.465		3	265	635.476
3	241	350.2		3	263	417.05		3	264	541.113		3	266	665.665
3	242	305.485		3	264	438.331		3	265	563.926		3	267	613.852
3	243	332.208		3	265	455.015		3	266	585.074		3	268	645.57
3	244	318.485		3	266	484.233		3	267	629.007		3	269	611.267
3	245	351.693		3	267	461.13		3	268	554.803		3	270	581.665
3	246	338.222		3	268	460.906		3	269	555.555		3	271	659.797
3	247	368.377		3	269	489.172		3	270	579.641		3	272	654.771
3	248	317.958		3	270	454.947		3	271	537.966		3	273	597.206
3	249	352.632		3	271	449.246		3	272	527.278		3	274	629.463
3	250	371.348		3	272	425.585		3	273	532.416		3	275	621.97
3	251	341.139		3	273	469.825		3	274	568.753		3	276	649.348
3	252	341.554		3	274	434.128		3	275	594.046		3	277	588.207
3	253	356.028		3	275	434.894		3	276	530.863		3	278	632.221
3	254	355.56		3	276	410.305		3	277	558.367		3	279	682.815
3	255	357.964		3	277	443.391		3	278	593.551		3	280	670.095
3	256	332.689		3	278	442.995		3	279	617.203		3	281	667.071
3	257	331.299		3	279	433.015		3	280	628.578		3	282	631.548
3	258	337.064		3	280	418.786		3	281	585.826		3	283	646.303
3	259	371.552		3	281	506.663		3	282	594.296		3	284	665.804
3	260	342.634		3	282	458.705		3	283	555.599		3	285	662.556
3	261	379.746		3	283	485.103		3	284	633.492		3	286	623.976
3	262	332.901		3	284	436.719		3	285	583.508		3	287	590.646
3	263	322.679		3	285	461.096		3	286	503.607		3	288	673.596
3	264	330.646		3	286	428.291		3	287	584.596		3	289	623.864
3	265	341.566		3	287	428.849		3	288	577.116		3	290	664.168
3	266	378.145		3	288	456.734		3	289	563.118		3	291	685.684
3	267	373.46		3	289	445.468		3	290	574.935		3	292	652.382
3	268	387.086		3	290	444.856		3	291	512.314		3	293	620.419
3	269	312.682		3	291	400.816		3	292	518.513		3	294	612.816
3	270	353.061		3	292	407.747		3	293	569.331		3	295	636.539
3	271	331.731		3	293	426.903		3	294	571.899		3	296	651.929
3	272	406.481		3	294	416.574		3	295	524.854		3	297	640.258
3	273	400.45		3	295	420.584		3	296	531.642		3	298	647.071
3	274	326.15		3	296	451.09		3	297	508.249		3	299	665.716
3	275	342.742		3	297	464.826		3	298	552.583		3	300	677.249
3	276	368.889		3	298	411.878		3	299	500.261		3	301	640.744
3	277	338.869		3	299	419.01		3	300	540.985		3	302	682.091
3	278	342.077		3	300	408.557		3	301	524.572		3	303	635.083
3	279	402.231		3	301	460.807		3	302	503.734		3	304	637.897
3	280	372.957		3	302	418.409		3	303	527.865		3	305	622.024
3	281	317.864		3	303	393.769		3	304	569.864		3	306	617.472
3	282	349.537		3	304	461.236		3	305	545.603		3	307	681.006
3	283	288.907		3	305	441.066		3	306	584.55		3	308	628.704
3	284	350.128		3	306	410.889		3	307	538.123		3	309	657.62
3	285	342.096		3	307	419.048		3	308	578.665		3	310	623.628
3	286	339.279		3	308	496.748		3	309	534.149		3	311	593.225
3	287	342.779		3	309	412.022		3	310	603.306		3	312	644.473
3	288	343.982		3	310	428.754		3	311	577.557		3	313	637.23
3	289	308.22		3	311	442.188		3	312	517.42		3	314	636.91
3	290	349.129		3	312	403.295		3	313	577.336		3	315	605.8
3	291	339.177		3	313	413.853		3	314	524.09		3	316	674.841
3	292	337.604		3	314	430.736		3	315	554.737		3	317	673.978
3	293	323.159		3	315	439.164		3	316	572.131		3	318	639.61
3	294	360.326		3	316	461.658		3	317	591.517		3	319	650.965
3	295	321.672		3	317	483.422		3	318	573.433		3	320	644.305
3	296	312.276		3	318	486.246		3	319	541.757		3	321	609.636
3	297	360.626		3	319	467.792		3	320	545.085		3	322	634.628
3	298	345.417		3	320	451.71		3	321	582.046		3	323	630.347
3	299	289.462		3	321	472.266		3	322	577.043		3	324	649.826
3	300	296.373		3	322	485.272		3	323	550.951		3	325	639.458
3	301	342.208		3	323	501.103		3	324	581.254		3	326	661.177
3	302	345.49		3	324	429.37		3	325	536.846		3	327	615.179
3	303	299.41		3	325	448.526		3	326	510.266		3	328	659.253
3	304	327.659		3	326	428.553		3	327	564.487		3	329	627.379
3	305	329.84		3	327	391.018		3	328	566.018		3	330	636.214
3	306	288.077		3	328	431.258		3	329	564.923		3	331	664.217
3	307	316.833		4	0	395.99		3	330	614.384		3	332	662.585
3	308	304.491		4	1	391.199		3	331	568.335		3	333	680.509
3	309	290.058		4	2	394.398		3	332	556.59		3	334	674.204
3	310	345.196		4	3	400.448		3	333	538.797		3	335	679.62
3	311	291.758		4	4	394.051		3	334	521.165		4	0	605.254
3	312	346.073		4	5	382.519		3	335	574.102		4	1	666.041
3	313	348.804		4	6	394.941		3	336	528.953		4	2	631.528
3	314	283.954		4	7	392.512		3	337	552.144		4	3	672.966
3	315	320.146		4	8	440.461		4	0	568.723		4	4	658.351
3	316	346.785		4	9	407.581		4	1	549.833		4	5	668.4
3	317	391.329		4	10	403.687		4	2	578.913		4	6	632.003
3	318	367.823		4	11	464.211		4	3	570.909		4	7	608.73
3	319	315.805		4	12	364.121		4	4	532.183		4	8	665.17
3	320	318.249		4	13	426.633		4	5	588.132		4	9	614.411
3	321	349.526		4	14	392.011		4	6	595.909		4	10	612.096
3	322	303.26		4	15	467.876		4	7	563.062		4	11	676.321
3	323	312.763		4	16	403.29		4	8	544.051		4	12	680.341
3	324	311.448		4	17	402.547		4	9	575.486		4	13	645.97
3	325	371.424		4	18	434.313		4	10	578.595		4	14	611.962
3	326	309.279		4	19	405.263		4	11	575.663		4	15	686.455
3	327	345.818		4	20	434.973		4	12	567.273		4	16	702.352
3	328	340.952		4	21	395.83		4	13	577.139		4	17	661.958
3	329	335.137		4	22	358.412		4	14	587.195		4	18	641.101
3	330	301.744		4	23	364.639		4	15	544.284		4	19	618.996
3	331	300.758		4	24	434.653		4	16	574.833		4	20	625.022
3	332	330.009		4	25	383.567		4	17	575.846		4	21	658.268
3	333	344.572		4	26	372.641		4	18	563.547		4	22	663.611
3	334	325.045		4	27	356.632		4	19	583.839		4	23	666.676
3	335	329.806		4	28	383.283		4	20	524.387		4	24	657.364
3	336	336.329		4	29	465.225		4	21	508.398		4	25	656.311
3	337	320.203		4	30	436.341		4	22	512.456		4	26	686.974
3	338	300.532		4	31	407.268		4	23	565.343		4	27	679.509
3	339	345.149		4	32	393.637		4	24	574.29		4	28	627.281
3	340	325.071		4	33	403.5		4	25	555.308		4	29	649.447
4	0	399.068		4	34	420.443		4	26	575.331		4	30	693.963
4	1	351.678		4	35	396.71		4	27	564.838		4	31	635.368
4	2	385.897		4	36	400.074		4	28	587.904		4	32	625.798
4	3	386.183		4	37	361.589		4	29	577.386		4	33	663.092
4	4	389.532		4	38	448.633		4	30	558.842		4	34	652.42
4	5	404.828		4	39	391.23		4	31	531.751		4	35	644.324
4	6	399.13		4	40	403.014		4	32	573.262		4	36	655.95
4	7	365.253		4	41	423.349		4	33	605.958		4	37	641.087
4	8	456.775		4	42	435.743		4	34	555.697		4	38	609.163
4	9	375.98		4	43	468.073		4	35	586.877		4	39	626.225
4	10	390.5		4	44	381.672		4	36	604.676		4	40	622.632
4	11	395.648		4	45	406.96		4	37	591.819		4	41	703.359
4	12	426.577		4	46	400.391		4	38	562.417		4	42	655.72
4	13	397.44		4	47	411.502		4	39	547.595		4	43	667.951
4	14	403.401		4	48	393.423		4	40	548.126		4	44	650.69
4	15	369.207		4	49	363.202		4	41	558.062		4	45	654.276
4	16	423.911		4	50	379.639		4	42	581.605		4	46	649.207
4	17	406.966		4	51	424.85		4	43	559.228		4	47	700.48
4	18	383.47		4	52	412.537		4	44	552.093		4	48	690.292
4	19	367.971		4	53	394.471		4	45	524.378		4	49	655.815
4	20	389.395		4	54	457.863		4	46	582.609		4	50	648.255
4	21	372.37		4	55	415.008		4	47	591.111		4	51	664.816
4	22	385.279		4	56	452.849		4	48	565.451		4	52	617.059
4	23	412.725		4	57	424.654		4	49	576.379		4	53	668.927
4	24	355.477		4	58	416.78		4	50	573.877		4	54	623.223
4	25	385.195		4	59	461.509		4	51	578.53		4	55	631.075
4	26	356.94		4	60	431.402		4	52	516.735		4	56	678.818
4	27	351.33		4	61	438.908		4	53	549.334		4	57	698.097
4	28	333.303		4	62	443.003		4	54	539.092		4	58	657.732
4	29	414.374		4	63	420.087		4	55	572.114		4	59	679.264
4	30	390.498		4	64	468.426		4	56	573.256		4	60	686.579
4	31	418.788		4	65	471.695		4	57	564.952		4	61	684.906
4	32	397.026		4	66	425.352		4	58	556.559		4	62	637.837
4	33	413.07		4	67	457.46		4	59	530.286		4	63	678.449
4	34	393.421		4	68	457.975		4	60	555.679		4	64	624.41
4	35	409.566		4	69	415.903		4	61	538.599		4	65	626.439
4	36	401.952		4	70	433.092		4	62	566.854		4	66	674.616
4	37	386.871		4	71	407.476		4	63	550.855		4	67	658.061
4	38	397.47		4	72	450.807		4	64	538.411		4	68	657.35
4	39	379.07		4	73	399.766		4	65	528.102		4	69	648.108
4	40	429.889		4	74	434.852		4	66	590.985		4	70	661.381
4	41	408.773		4	75	454.328		4	67	542.043		4	71	653.916
4	42	396.84		4	76	405.3		4	68	537.234		4	72	600.239
4	43	415.85		4	77	405.549		4	69	549.134		4	73	670.729
4	44	377.033		4	78	406.153		4	70	548.91		4	74	661.909
4	45	392.276		4	79	446.42		4	71	525.454		4	75	602.035
4	46	381.852		4	80	425.936		4	72	513.63		4	76	622.518
4	47	423.064		4	81	371.535		4	73	519.272		4	77	663.269
4	48	386.849		4	82	413.829		4	74	551.243		4	78	678.005
4	49	360.272		4	83	398.833		4	75	540.04		4	79	719.795
4	50	396.531		4	84	454.621		4	76	547.003		4	80	600.883
4	51	376.526		4	85	413.508		4	77	531.314		4	81	624.613
4	52	391.857		4	86	385.65		4	78	531.001		4	82	683.353
4	53	347.116		4	87	418.108		4	79	533.272		4	83	647.135
4	54	397.155		4	88	418.537		4	80	508.166		4	84	654.6
4	55	399.497		4	89	405.593		4	81	563.397		4	85	680.02
4	56	324.492		4	90	421.192		4	82	587.99		4	86	617.955
4	57	366.839		4	91	385.136		4	83	612.563		4	87	666.651
4	58	404.283		4	92	471.896		4	84	560.013		4	88	642.776
4	59	361.334		4	93	457.439		4	85	580.715		4	89	712.781
4	60	406.199		4	94	446.081		4	86	569.042		4	90	680.472
4	61	404.713		4	95	453.585		4	87	554.022		4	91	622.255
4	62	362.983		4	96	392.791		4	88	571.006		4	92	651.54
4	63	393.526		4	97	459.198		4	89	559.778		4	93	650.26
4	64	403.694		4	98	424.393		4	90	537.815		4	94	641.434
4	65	392.791		4	99	439.139		4	91	546.337		4	95	667.332
4	66	399.468		4	100	405.307		4	92	542.734		4	96	619.521
4	67	381.978		4	101	456.051		4	93	565.038		4	97	616.231
4	68	343.223		4	102	417.4		4	94	589.083		4	98	699.296
4	69	408.851		4	103	427.924		4	95	544.525		4	99	714.571
4	70	410.156		4	104	401.803		4	96	581.216		4	100	635.85
4	71	386.856		4	105	411.142		4	97	593.458		4	101	648.839
4	72	335.352		4	106	456.774		4	98	554.502		4	102	665.515
4	73	368.406		4	107	437.752		4	99	604.309		4	103	736.765
4	74	347.253		4	108	419.362		4	100	569.687		4	104	675.939
4	75	383.092		4	109	461.817		4	101	577.468		4	105	675.736
4	76	367.298		4	110	469.023		4	102	575.174		4	106	666.956
4	77	363.313		4	111	434.999		4	103	546.942		4	107	632.145
4	78	377.965		4	112	427.733		4	104	554.691		4	108	674.43
4	79	398.531		4	113	420.56		4	105	585.415		4	109	672.127
4	80	344.806		4	114	379.675		4	106	574.972		4	110	659.787
4	81	413.339		4	115	413.25		4	107	583.761		4	111	639.204
4	82	389.671		4	116	451.202		4	108	561.123		4	112	670.368
4	83	390.993		4	117	411.988		4	109	568.875		4	113	684.774
4	84	383.543		4	118	367.628		4	110	604.441		4	114	636.201
4	85	368.048		4	119	431.794		4	111	551.445		4	115	676.058
4	86	380.055		4	120	417.025		4	112	563.304		4	116	684.875
4	87	318.785		4	121	433.254		4	113	536.46		4	117	681.712
4	88	411.634		4	122	444.143		4	114	535.651		4	118	674.357
4	89	385.14		4	123	450.437		4	115	545.226		4	119	695.866
4	90	362.76		4	124	393.063		4	116	529.479		4	120	623.148
4	91	327.568		4	125	412.349		4	117	557.242		4	121	647.695
4	92	318.555		4	126	451.023		4	118	574.817		4	122	677.575
4	93	394.986		4	127	412.694		4	119	541.758		4	123	659.65
4	94	340.63		4	128	396.102		4	120	560.349		4	124	663.521
4	95	355.467		4	129	400.168		4	121	581.151		4	125	648.777
4	96	355.248		4	130	399.218		4	122	531.114		4	126	686.323
4	97	366.221		4	131	418.846		4	123	551.565		4	127	661.005
4	98	387.722		4	132	442.811		4	124	573.62		4	128	676.509
4	99	401.028		4	133	429.332		4	125	558.949		4	129	650.299
4	100	376.701		4	134	419.23		4	126	553.905		4	130	672.972
4	101	388.382		4	135	434.154		4	127	546.582		4	131	658.846
4	102	373.467		4	136	441.908		4	128	584.142		4	132	669.918
4	103	432.903		4	137	480.945		4	129	558.815		4	133	701.301
4	104	374.394		4	138	484.442		4	130	541.878		4	134	636.678
4	105	383.901		4	139	440.736		4	131	553.694		4	135	670.331
4	106	372.561		4	140	346.666		4	132	549.746		4	136	685.449
4	107	379.832		4	141	382.56		4	133	535.507		4	137	628.551
4	108	391.598		4	142	415.075		4	134	525.766		4	138	637.969
4	109	354.063		4	143	405.296		4	135	522.109		4	139	670.9
4	110	380.67		4	144	401.483		4	136	551.62		4	140	630.463
4	111	387.154		4	145	433.875		4	137	564.283		4	141	644.746
4	112	371.125		4	146	458.003		4	138	525.469		4	142	681.675
4	113	387.35		4	147	352.608		4	139	559.233		4	143	637.167
4	114	362.316		4	148	405.769		4	140	581.186		4	144	692.209
4	115	354.075		4	149	417.397		4	141	574.867		4	145	653.635
4	116	395.311		4	150	370.353		4	142	521.731		4	146	646.438
4	117	327.594		4	151	420.182		4	143	514.321		4	147	653.193
4	118	391.508		4	152	467.643		4	144	591.686		4	148	698.873
4	119	386.206		4	153	460.49		4	145	549.861		4	149	694.738
4	120	349.918		4	154	444.891		4	146	539.982		4	150	680.236
4	121	369.528		4	155	413.076		4	147	538.265		4	151	682.766
4	122	363.011		4	156	371.974		4	148	566.448		4	152	630.004
4	123	349.628		4	157	385.845		4	149	570.496		4	153	627.501
4	124	364.507		4	158	396.551		4	150	560.477		4	154	663.131
4	125	371.725		4	159	391.295		4	151	558.884		4	155	631.058
4	126	387.917		4	160	397.625		4	152	571.429		4	156	661.32
4	127	427.214		4	161	439.531		4	153	567.674		4	157	685.358
4	128	370.441		4	162	397.155		4	154	551.624		4	158	669.315
4	129	384.816		4	163	442.103		4	155	517.176		4	159	676.102
4	130	368.063		4	164	421.221		4	156	576.836		4	160	665.826
4	131	392.342		4	165	460.617		4	157	523.671		4	161	684.977
4	132	357.745		4	166	386.307		4	158	562.745		4	162	664.46
4	133	376.487		4	167	371.498		4	159	538.002		4	163	634.01
4	134	401.475		4	168	427.021		4	160	557.98		4	164	644.457
4	135	427.449		4	169	401.521		4	161	555.501		4	165	658.906
4	136	420.189		4	170	429.716		4	162	561.012		4	166	677.207
4	137	390.471		4	171	467.968		4	163	547.987		4	167	613.983
4	138	406.803		4	172	506.466		4	164	565.907		4	168	650.216
4	139	402.704		4	173	476.022		4	165	517.772		4	169	698.766
4	140	407.829		4	174	448.58		4	166	566.164		4	170	678.419
4	141	383.954		4	175	405.455		4	167	556.973		4	171	671.768
4	142	431.702		4	176	434.579		4	168	552.57		4	172	703.764
4	143	339.938		4	177	400.308		4	169	538.908		4	173	677.292
4	144	381.851		4	178	421.986		4	170	498.192		4	174	672.807
4	145	327.458		4	179	416.377		4	171	566.959		4	175	676.08
4	146	351.025		4	180	439.607		4	172	562.683		4	176	680.794
4	147	373.159		4	181	442.379		4	173	570.398		4	177	684.066
4	148	363.978		4	182	399.029		4	174	561.439		4	178	669.765
4	149	399.773		4	183	421.441		4	175	555.129		4	179	639.068
4	150	340.637		4	184	379.761		4	176	575.483		4	180	625.484
4	151	376.202		4	185	431.425		4	177	549.233		4	181	647.987
4	152	396.634		4	186	407.438		4	178	551.825		4	182	670.201
4	153	360.709		4	187	356.959		4	179	556.752		4	183	684.89
4	154	375.736		4	188	450.002		4	180	586.289		4	184	625.471
4	155	394.823		4	189	438.611		4	181	583.56		4	185	661.347
4	156	389.667		4	190	438.443		4	182	564.009		4	186	665.353
4	157	387.69		4	191	392.34		4	183	561.757		4	187	614.887
4	158	389.639		4	192	426.081		4	184	573.531		4	188	622.161
4	159	382.808		4	193	383.769		4	185	575.738		4	189	663.987
4	160	325.025		4	194	428.18		4	186	527.169		4	190	674.124
4	161	367.777		4	195	455.669		4	187	551.334		4	191	661.667
4	162	375.388		4	196	428.489		4	188	547.436		4	192	697.964
4	163	390.969		4	197	497.261		4	189	550.617		4	193	702.888
4	164	391.679		4	198	470.984		4	190	585.704		4	194	655.711
4	165	404.381		4	199	472.302		4	191	583.994		4	195	656.314
4	166	359.443		4	200	440.014		4	192	548.824		4	196	639.801
4	167	365.459		4	201	433.647		4	193	581.318		4	197	650.953
4	168	396.757		4	202	426.358		4	194	566.794		4	198	668.76
4	169	331.699		4	203	404.977		4	195	568.401		4	199	684.209
4	170	371.306		4	204	429.095		4	196	551.276		4	200	621.185
4	171	383.97		4	205	460.455		4	197	553.465		4	201	608.988
4	172	394.726		4	206	445.075		4	198	507.707		4	202	623.393
4	173	350.371		4	207	459.937		4	199	523.806		4	203	641.908
4	174	379.684		4	208	399.545		4	200	565.271		4	204	664.757
4	175	363.997		4	209	410.806		4	201	581.01		4	205	662.218
4	176	392.424		4	210	444.757		4	202	502.525		4	206	682.259
4	177	365.273		4	211	382.336		4	203	513.203		4	207	666.955
4	178	374.453		4	212	440.957		4	204	560.763		4	208	663.14
4	179	388.51		4	213	400.755		4	205	532.214		4	209	611.903
4	180	406.369		4	214	446.301		4	206	561.406		4	210	581.082
4	181	403.239		4	215	436.438		4	207	566.432		4	211	644.412
4	182	386.173		4	216	410.309		4	208	558.902		4	212	685.161
4	183	362.851		4	217	431.531		4	209	570.614		4	213	608.185
4	184	379.331		4	218	507.76		4	210	577.37		4	214	672.007
4	185	400.057		4	219	412.023		4	211	554.01		4	215	648.028
4	186	400.699		4	220	443.695		4	212	562.286		4	216	672.885
4	187	391.916		4	221	447.212		4	213	568.543		4	217	670.893
4	188	431.645		4	222	462.473		4	214	547.34		4	218	650.154
4	189	364.339		4	223	441.87		4	215	562.872		4	219	709.453
4	190	364.193		4	224	459.007		4	216	611.01		4	220	670.384
4	191	384.601		4	225	442.6		4	217	575.781		4	221	641.98
4	192	374.213		4	226	428.696		4	218	527.741		4	222	692.517
4	193	358.33		4	227	480.793		4	219	534.927		4	223	622.406
4	194	367.839		4	228	464.572		4	220	576.749		4	224	672.126
4	195	413.182		4	229	421.364		4	221	576.937		4	225	685.419
4	196	379.06		4	230	416.225		4	222	555.681		4	226	616.1
4	197	376.855		4	231	441.546		4	223	570.119		4	227	623.469
4	198	343.868		4	232	453.517		4	224	547.52		4	228	657.236
4	199	383.691		4	233	420.347		4	225	539.726		4	229	670.353
4	200	420.459		4	234	454.209		4	226	579.955		4	230	611.043
4	201	423.274		4	235	458.227		4	227	562.839		4	231	686.046
4	202	353.435		4	236	463.874		4	228	572.095		4	232	689.975
4	203	377.323		4	237	475.907		4	229	585.623		4	233	673.434
4	204	386.841		4	238	418.491		4	230	560.06		4	234	660.596
4	205	363.182		4	239	411.529		4	231	589.648		4	235	634.083
4	206	380.589		4	240	376.771		4	232	560.06		4	236	613.948
4	207	383.723		4	241	420.992		4	233	535.117		4	237	657.01
4	208	385.304		4	242	372.176		4	234	531.814		4	238	661.451
4	209	377.905		4	243	433.426		4	235	563.648		4	239	648.558
4	210	388.122		4	244	408.255		4	236	574.909		4	240	642.535
4	211	390.925		4	245	380.75		4	237	531.43		4	241	665.603
4	212	366.366		4	246	444.389		4	238	569.535		4	242	685.324
4	213	356.732		4	247	431.638		4	239	551.685		4	243	676.423
4	214	333.083		4	248	418.183		4	240	524.83		4	244	660.409
4	215	434.858		4	249	410.86		4	241	539.766		4	245	678.951
4	216	433.706		4	250	426.162		4	242	568.88		4	246	633.243
4	217	367.135		4	251	434.979		4	243	537.197		4	247	642.844
4	218	386.751		4	252	424.433		4	244	551.695		4	248	644.657
4	219	361.307		4	253	388.009		4	245	574.193		4	249	665.381
4	220	407.521		4	254	421.364		4	246	540.489		4	250	673.807
4	221	404.465		4	255	382.116		4	247	561.497		4	251	661.526
4	222	401.913		4	256	427.328		4	248	583.689		4	252	682.983
4	223	384.475		4	257	372.384		4	249	572.829		4	253	685.961
4	224	395.833		4	258	407.841		4	250	579.879		4	254	668.383
4	225	379.144		4	259	414.975		4	251	574.921		4	255	667.293
4	226	402.751		4	260	394.992		4	252	598.374		4	256	616.056
4	227	429.56		4	261	406.652		4	253	605.136		4	257	680.116
4	228	443.119		4	262	433.035		4	254	542.067		4	258	641.729
4	229	367.299		4	263	441.989		4	255	508.424		4	259	669.697
4	230	385.696		4	264	389.229		4	256	546.783		4	260	663.014
4	231	340.109		4	265	451.308		4	257	544.314		4	261	672.847
4	232	370.368		4	266	437.346		4	258	595.092		4	262	715.03
4	233	356.004		4	267	428.555		4	259	538.689		4	263	661.574
4	234	377.053		4	268	361.019		4	260	510.026		4	264	669.751
4	235	368.779		4	269	410.946		4	261	563.704		4	265	674.371
4	236	388.28		4	270	417.186		4	262	550.401		4	266	650.774
4	237	360.003		4	271	375.75		4	263	554.036		4	267	622.987
4	238	433.578		4	272	420.265		4	264	558.536		4	268	646.265
4	239	400.394		4	273	421.622		4	265	561.187		4	269	646.56
4	240	383.79		4	274	403.332		4	266	541.285		4	270	656.004
4	241	397.979		4	275	361.38		4	267	549.444		4	271	670.06
4	242	343.166		4	276	405.44		4	268	543.163		4	272	652.363
4	243	375.136		4	277	452.075		4	269	550.683		4	273	611.513
4	244	307.403		4	278	418.256		4	270	554.125		4	274	643.121
4	245	398.567		4	279	399.988		4	271	591.718		4	275	639.414
4	246	386.867		4	280	424.118		4	272	552.315		4	276	675.14
4	247	335.883		4	281	396.404		4	273	535.242		4	277	671.197
4	248	342.162		4	282	429.59		4	274	530.69		4	278	634.864
4	249	374.821		4	283	452.34		4	275	532.916		4	279	667.019
4	250	326.316		4	284	421.615		4	276	564.553		4	280	663.631
4	251	367.372		4	285	404.75		4	277	536.93		4	281	660.15
4	252	390.54		4	286	425.91		4	278	568.128		4	282	671.229
4	253	372.169		4	287	453.706		4	279	512.838		4	283	609.582
4	254	384.298		4	288	442.307		4	280	569.18		4	284	661.356
4	255	365.779		4	289	458.437		4	281	531.624		4	285	674.526
4	256	334.862		4	290	446.657		4	282	555.63		4	286	644.582
4	257	306.677		4	291	476.027		4	283	588.503		4	287	672.793
4	258	370.446		4	292	481.773		4	284	570.862		4	288	679.342
4	259	337.075		4	293	439.062		4	285	567.381		4	289	691.952
4	260	401.521		4	294	429.87		4	286	547.331		4	290	653.148
4	261	423.46		4	295	450.859		4	287	564.843		4	291	661.724
4	262	392.121		4	296	429.428		4	288	551.408		4	292	681.546
4	263	406.596		4	297	452.736		4	289	546.922		4	293	651.443
4	264	409.134		4	298	455.264		4	290	599.396		4	294	655.621
4	265	364.363		4	299	398.809		4	291	569.608		4	295	674.942
4	266	375.004		4	300	427.235		4	292	522.961		4	296	658.77
4	267	391.395		4	301	423.75		4	293	569.863		4	297	702.608
4	268	336.275		4	302	450.179		4	294	564.245		4	298	627.245
4	269	379.421		4	303	421.927		4	295	536.325		4	299	680.487
4	270	401.792		4	304	434.439		4	296	562.407		4	300	719.3
4	271	412.691		4	305	405.288		4	297	547.102		4	301	684.445
4	272	429.563		4	306	439.258		4	298	534.994		4	302	646.573
4	273	387.772		4	307	391.019		4	299	571.093		4	303	658.782
4	274	383.84		4	308	440.305		4	300	575.499		4	304	679.274
4	275	380.964		4	309	390.462		4	301	588.302		4	305	693.753
4	276	399.784		4	310	422.902		4	302	555.988		4	306	691.235
4	277	385.498		4	311	390.66		4	303	529.778		4	307	649.665
4	278	299.308		4	312	380.595		4	304	526.294		4	308	672.481
4	279	388.834		4	313	448.967		4	305	577.806		4	309	663.244
4	280	432.03		4	314	464.19		4	306	559.363		4	310	662.281
4	281	390.544		4	315	435.979		4	307	600.59		4	311	733.549
4	282	355.605		4	316	378.809		4	308	514.399		4	312	678.048
4	283	379.233		4	317	400.293		4	309	545.228		4	313	620.664
4	284	383.038		4	318	386.395		4	310	542.955		4	314	706.198
4	285	379.332		4	319	414.051		4	311	548.79		4	315	637.595
4	286	381.72		4	320	446.949		4	312	566.126		4	316	690.591
4	287	360.098		4	321	413.094		4	313	564.111		4	317	663.595
4	288	340.144		4	322	439.963		4	314	577.573		4	318	635.989
4	289	373.609		4	323	380.582		4	315	555.489		4	319	640.322
4	290	383.663		4	324	397.744		4	316	554.439		4	320	674.814
4	291	404.389		4	325	443.661		4	317	552.399		4	321	637.596
4	292	411.641		4	326	437.536		4	318	531.955		4	322	649.753
4	293	352.639		4	327	414.967		4	319	552.551		4	323	650.529
4	294	347.581		4	328	405.18		4	320	546.762		4	324	630.217
4	295	428.037		4	329	420.872		4	321	515.14		4	325	676.184
4	296	350.628		4	330	462.103		4	322	529.786		4	326	652.288
4	297	363.318		4	331	393.254		4	323	492.524		4	327	603.877
4	298	348.378		4	332	382.097		4	324	553.091		4	328	662.668
4	299	371.089		4	333	419.606		4	325	572.675		4	329	685.476
4	300	363.545		4	334	361.096		4	326	606.648		4	330	652.038
4	301	363.926		5	0	507.867		4	327	572.867		4	331	671.484
4	302	399.809		5	1	496.343		4	328	555.978		4	332	658.395
4	303	330.839		5	2	492.87		4	329	522.569		4	333	666.758
4	304	390.737		5	3	464.842		4	330	555.725		4	334	644.925
4	305	354.291		5	4	501.754		4	331	554.429		4	335	671.174
4	306	390.236		5	5	493.837		4	332	547.852		5	0	592.201
4	307	372.268		5	6	499.469		4	333	552.504		5	1	632.155
4	308	351.072		5	7	471.807		4	334	570.079		5	2	619.985
4	309	376.085		5	8	500.575		4	335	534.577		5	3	609.766
4	310	400.737		5	9	499.355		4	336	579.666		5	4	671.431
4	311	369.795		5	10	507.653		4	337	537.612		5	5	681.259
4	312	369.523		5	11	485.641		4	338	536.381		5	6	612.237
4	313	335.782		5	12	457.458		4	339	525.525		5	7	635.385
4	314	336.533		5	13	500.361		4	340	532.821		5	8	635.688
4	315	380.305		5	14	541.616		5	0	477.777		5	9	621.898
4	316	366.625		5	15	506.571		5	1	549.253		5	10	627.087
4	317	413.527		5	16	518.806		5	2	503.506		5	11	643.102
4	318	375.329		5	17	494.783		5	3	575.557		5	12	671.551
4	319	429.813		5	18	545.147		5	4	521.843		5	13	678.818
4	320	403.661		5	19	510.925		5	5	562.773		5	14	589.15
4	321	421.302		5	20	517.576		5	6	533.172		5	15	654.068
4	322	341.604		5	21	492.261		5	7	531.833		5	16	621.654
4	323	387.791		5	22	537.935		5	8	550.562		5	17	635.727
4	324	391		5	23	502.499		5	9	529.764		5	18	637.743
4	325	391.037		5	24	503.893		5	10	548.95		5	19	612.093
4	326	408.872		5	25	516.749		5	11	546.89		5	20	602.676
4	327	356.158		5	26	507.605		5	12	562.58		5	21	620.875
4	328	415.014		5	27	503.81		5	13	516.405		5	22	635.93
4	329	432.224		5	28	553.603		5	14	536.169		5	23	657.779
4	330	401.403		5	29	539.521		5	15	543.226		5	24	592.942
4	331	384.76		5	30	460.931		5	16	560.582		5	25	631.013
4	332	355.935		5	31	469.856		5	17	574.474		5	26	605.779
4	333	386.825		5	32	540.696		5	18	551.117		5	27	601.543
4	334	369.165		5	33	485.297		5	19	538.895		5	28	591.104
4	335	353.786		5	34	521.262		5	20	517.497		5	29	597.685
4	336	410.339		5	35	500.683		5	21	549.414		5	30	634.572
4	337	401.724		5	36	536.887		5	22	501.797		5	31	658.856
4	338	394.753		5	37	499.53		5	23	589.903		5	32	647.622
4	339	368.234		5	38	488.834		5	24	540.048		5	33	651.321
4	340	393.554		5	39	484.057		5	25	562.672		5	34	587.907
4	341	408.156		5	40	484.36		5	26	559.685		5	35	608.837
4	342	383.256		5	41	493.913		5	27	527.931		5	36	629.953
4	343	356.408		5	42	492.435		5	28	535.552		5	37	646.701
4	344	382.634		5	43	527.713		5	29	530.392		5	38	654.835
4	345	394.099		5	44	581.239		5	30	525.919		5	39	646.85
4	346	424.844		5	45	502.57		5	31	575.335		5	40	627.29
4	347	432.791		5	46	496.843		5	32	575.197		5	41	632.701
4	348	435.894		5	47	489.993		5	33	505.088		5	42	650.448
4	349	402.683		5	48	499.78		5	34	513.855		5	43	673.495
4	350	383.585		5	49	522.535		5	35	547.074		5	44	617.239
4	351	386.649		5	50	538.868		5	36	510.646		5	45	597.948
4	352	391.68		5	51	511.719		5	37	537.865		5	46	639.702
4	353	385.145		5	52	452.343		5	38	476.724		5	47	662.52
4	354	409.153		5	53	506.805		5	39	491.521		5	48	625.458
4	355	377.881		5	54	462.677		5	40	538.341		5	49	666.193
4	356	417.609		5	55	490.131		5	41	552.698		5	50	654.537
4	357	391.62		5	56	504.076		5	42	512.898		5	51	661.245
4	358	427.207		5	57	503.216		5	43	524.38		5	52	638.821
5	0	369.955		5	58	527.459		5	44	541.442		5	53	649.146
5	1	361.365		5	59	544.684		5	45	568.245		5	54	616.032
5	2	384.447		5	60	508.163		5	46	540.723		5	55	657.724
5	3	376.858		5	61	501.917		5	47	521.519		5	56	627.832
5	4	337.955		5	62	534.386		5	48	484.014		5	57	633.239
5	5	334.871		5	63	464.332		5	49	541.587		5	58	641.135
5	6	318.807		5	64	493.798		5	50	537.416		5	59	674.608
5	7	339.592		5	65	495.08		5	51	491.126		5	60	653.663
5	8	339.131		5	66	540.904		5	52	552.017		5	61	620.715
5	9	390.124		5	67	456.731		5	53	539.529		5	62	615.765
5	10	400.201		5	68	511.798		5	54	525.553		5	63	624.618
5	11	368.394		5	69	474.384		5	55	480.096		5	64	622.895
5	12	377.453		5	70	518.944		5	56	524.525		5	65	577.667
5	13	383.714		5	71	513.681		5	57	540.966		5	66	603.883
5	14	370.416		5	72	510.049		5	58	539.808		5	67	586.978
5	15	379.005		5	73	498.615		5	59	489.284		5	68	632.143
5	16	374.861		5	74	432.667		5	60	474.11		5	69	632.366
5	17	360.257		5	75	464.536		5	61	461.768		5	70	588.6
5	18	370.809		5	76	491.423		5	62	493.259		5	71	626.114
5	19	336.469		5	77	531.165		5	63	490.908		5	72	589.94
5	20	377.12		5	78	526.114		5	64	492.872		5	73	609.155
5	21	365.43		5	79	471.27		5	65	521.704		5	74	633.9
5	22	358.023		5	80	489.075		5	66	537.812		5	75	597.005
5	23	354.35		5	81	484.022		5	67	483.944		5	76	606.436
5	24	352.688		5	82	500.02		5	68	542.35		5	77	635.307
5	25	331.618		5	83	495.384		5	69	504.693		5	78	666.726
5	26	346.52		5	84	527.846		5	70	512.596		5	79	655.064
5	27	357.951		5	85	517.076		5	71	528.642		5	80	669.124
5	28	382.395		5	86	500.298		5	72	498.475		5	81	664.826
5	29	365.956		5	87	490.847		5	73	526.214		5	82	610.193
5	30	349.911		5	88	496.828		5	74	555.625		5	83	587.198
5	31	406.239		5	89	500.564		5	75	572.037		5	84	629.128
5	32	365.847		5	90	467.724		5	76	521.165		5	85	649.323
5	33	344.027		5	91	452.59		5	77	571.109		5	86	632.824
5	34	342.775		5	92	519.078		5	78	486.962		5	87	654.354
5	35	353.966		5	93	515.167		5	79	539.014		5	88	642.145
5	36	371.312		5	94	531.821		5	80	558.84		5	89	611.511
5	37	359.99		5	95	479.397		5	81	542.122		5	90	602.094
5	38	367.476		5	96	476.671		5	82	563.739		5	91	659.848
5	39	389.084		5	97	529.223		5	83	574.593		5	92	640.962
5	40	309.501		5	98	474.819		5	84	534.624		5	93	637.665
5	41	367.172		5	99	460.776		5	85	513.683		5	94	630.508
5	42	382.545		5	100	492.187		5	86	536.292		5	95	624.784
5	43	369.152		5	101	500.526		5	87	526.191		5	96	614.51
5	44	369.538		5	102	498.087		5	88	504.667		5	97	611.456
5	45	329.986		5	103	512.215		5	89	467.953		5	98	643.953
5	46	382.359		5	104	509.15		5	90	510.812		5	99	635.504
5	47	348.587		5	105	512.235		5	91	530.102		5	100	620.373
5	48	379.519		5	106	457.225		5	92	525.149		5	101	618.154
5	49	317.95		5	107	490.596		5	93	508.208		5	102	614.69
5	50	380.978		5	108	487.399		5	94	497.87		5	103	630.338
5	51	384.038		5	109	480.707		5	95	513.064		5	104	677.045
5	52	390.83		5	110	535.034		5	96	554.268		5	105	640.142
5	53	392.828		5	111	513.147		5	97	555.977		5	106	626.485
5	54	328.844		5	112	484.712		5	98	509.481		5	107	589.435
5	55	352.85		5	113	499.603		5	99	514.718		5	108	618.399
5	56	354.493		5	114	522.85		5	100	552.519		5	109	626.193
5	57	357.759		5	115	497.357		5	101	543.661		5	110	573.647
5	58	398.139		5	116	507.941		5	102	528.795		5	111	645.418
5	59	311.666		5	117	498.676		5	103	515.508		5	112	615.21
5	60	335.029		5	118	535.02		5	104	500.427		5	113	640.758
5	61	310.962		5	119	481.243		5	105	511.787		5	114	654.888
5	62	362.596		5	120	506.337		5	106	518.892		5	115	629.768
5	63	387.013		5	121	511.085		5	107	511.451		5	116	651.84
5	64	352.253		5	122	521.297		5	108	512.342		5	117	639.784
5	65	364.943		5	123	495.585		5	109	516.849		5	118	629.266
5	66	367.977		5	124	481.359		5	110	519.212		5	119	664.817
5	67	362.534		5	125	506.696		5	111	538.465		5	120	629.182
5	68	358.11		5	126	496.128		5	112	564.707		5	121	647.412
5	69	388.095		5	127	463.374		5	113	530.8		5	122	638.203
5	70	380.913		5	128	507.217		5	114	558.578		5	123	661.903
5	71	370.31		5	129	502.224		5	115	521.916		5	124	605.771
5	72	379.041		5	130	508.127		5	116	515.617		5	125	603.281
5	73	375.083		5	131	496.923		5	117	512.216		5	126	636.957
5	74	346.301		5	132	476.082		5	118	509.834		5	127	633.4
5	75	339.954		5	133	488.624		5	119	524.321		5	128	649.899
5	76	364.97		5	134	520.217		5	120	501.309		5	129	638.83
5	77	367.226		5	135	539.294		5	121	504.783		5	130	623.386
5	78	344.956		5	136	509.465		5	122	516.649		5	131	661.23
5	79	378.396		5	137	501.587		5	123	538.68		5	132	573.978
5	80	394.834		5	138	517.995		5	124	547.643		5	133	659.433
5	81	365.056		5	139	544.296		5	125	530.326		5	134	610.684
5	82	382.162		5	140	475.678		5	126	541.309		5	135	641.205
5	83	358.069		5	141	527.775		5	127	574.024		5	136	622.554
5	84	374.079		5	142	527.106		5	128	528.154		5	137	638.93
5	85	370.32		5	143	483.97		5	129	560.814		5	138	681.068
5	86	389.285		5	144	499.946		5	130	540.957		5	139	631.17
5	87	356.255		5	145	552.091		5	131	537.544		5	140	644.757
5	88	403.896		5	146	463.554		5	132	534.128		5	141	648.692
5	89	357.826		5	147	483.375		5	133	532.992		5	142	576.023
5	90	328.707		5	148	483.609		5	134	554.494		5	143	603.111
5	91	378.885		5	149	509.693		5	135	492.955		5	144	629.238
5	92	390.197		5	150	529.586		5	136	447.398		5	145	629.789
5	93	399.858		5	151	465.94		5	137	527.184		5	146	593.643
5	94	372.656		5	152	512.023		5	138	569.414		5	147	599.679
5	95	372.593		5	153	520.748		5	139	488.997		5	148	610.036
5	96	369.281		5	154	560.395		5	140	515.063		5	149	620.167
5	97	384.599		5	155	497.474		5	141	556.01		5	150	603.313
5	98	344.958		5	156	548.661		5	142	555.673		5	151	655.27
5	99	363.644		5	157	504.293		5	143	541.895		5	152	623.26
5	100	357.171		5	158	479.401		5	144	551.046		5	153	631.595
5	101	363.796		5	159	512		5	145	561.62		5	154	628.298
5	102	376.435		5	160	526.588		5	146	532.412		5	155	584.072
5	103	350.655		5	161	515.142		5	147	527.028		5	156	648.821
5	104	378.024		5	162	525.697		5	148	566.993		5	157	617.793
5	105	395.552		5	163	485.482		5	149	520.387		5	158	675.725
5	106	370.1		5	164	508.192		5	150	546.252		5	159	632.143
5	107	371.765		5	165	515.545		5	151	527.458		5	160	601.88
5	108	348.177		5	166	559.456		5	152	541.364		5	161	592.145
5	109	359.445		5	167	515.362		5	153	537.549		5	162	632.401
5	110	347.894		5	168	527.353		5	154	492.24		5	163	652.215
5	111	356.637		5	169	511.072		5	155	507.97		5	164	654.08
5	112	361.402		5	170	492.602		5	156	547.081		5	165	635.064
5	113	355.237		5	171	489.846		5	157	550.547		5	166	616.881
5	114	354.527		5	172	500.36		5	158	547.2		5	167	642.748
5	115	342.601		5	173	508.759		5	159	511.244		5	168	639.236
5	116	375.344		5	174	513.859		5	160	515.679		5	169	651.366
5	117	357.741		5	175	519.682		5	161	558.873		5	170	651.882
5	118	383.52		5	176	511.65		5	162	516.395		5	171	619.978
5	119	380.191		5	177	515.726		5	163	509.679		5	172	670.687
5	120	380.588		5	178	501.21		5	164	566.876		5	173	638.603
5	121	387.768		5	179	516.522		5	165	515.633		5	174	596.296
5	122	357.887		5	180	459.596		5	166	546.801		5	175	599.88
5	123	348.028		5	181	526.266		5	167	533.698		5	176	638.196
5	124	378.757		5	182	507.059		5	168	524.523		5	177	595.862
5	125	331.982		5	183	476.273		5	169	527.87		5	178	647.375
5	126	367.281		5	184	494.688		5	170	499.11		5	179	601.639
5	127	334.919		5	185	551.896		5	171	525.345		5	180	614.917
5	128	388.381		5	186	518.925		5	172	543.66		5	181	589.199
5	129	360.461		5	187	498.489		5	173	552.087		5	182	608.774
5	130	408.289		5	188	510.739		5	174	520.931		5	183	585.396
5	131	398.977		5	189	481.435		5	175	557.904		5	184	619.523
5	132	356.595		5	190	510.072		5	176	548.625		5	185	633.006
5	133	342.375		5	191	488.41		5	177	557.994		5	186	613.588
5	134	380.037		5	192	454.429		5	178	543.895		5	187	611.219
5	135	360.904		5	193	442.543		5	179	514.392		5	188	651.041
5	136	355.415		5	194	499.592		5	180	514.083		5	189	649.709
5	137	388.907		5	195	494.491		5	181	499.385		5	190	630.965
5	138	383.193		5	196	498.323		5	182	478.481		5	191	673.527
5	139	401.642		5	197	509.926		5	183	478.341		5	192	645.842
5	140	366.761		5	198	545.623		5	184	524.202		5	193	671.57
5	141	326.896		5	199	485.475		5	185	554.476		5	194	652.343
5	142	377.039		5	200	502.413		5	186	515.76		5	195	621.4
5	143	325.565		5	201	469.019		5	187	517.955		5	196	656.367
5	144	320.755		5	202	517.571		5	188	540.648		5	197	643.849
5	145	369.226		5	203	473.154		5	189	531.704		5	198	662.611
5	146	397.912		5	204	511.64		5	190	510.082		5	199	588.837
5	147	350.222		5	205	506.136		5	191	524.861		5	200	632.224
5	148	329.718		5	206	533.111		5	192	471.292		5	201	637.248
5	149	367.859		5	207	522.078		5	193	559.113		5	202	624.197
5	150	376.327		5	208	536.868		5	194	526.671		5	203	651.655
5	151	379.778		5	209	512.623		5	195	435.655		5	204	633.764
5	152	371.245		5	210	518.927		5	196	486.455		5	205	558.757
5	153	396.836		5	211	473.036		5	197	513.768		5	206	602.896
5	154	390.475		5	212	494.2		5	198	533.054		5	207	595.908
5	155	347.738		5	213	478.617		5	199	517.865		5	208	608.022
5	156	362.874		5	214	499.527		5	200	480.666		5	209	625.74
5	157	387.514		5	215	487.654		5	201	518.939		5	210	628.847
5	158	372.321		5	216	484.605		5	202	537.722		5	211	644.5
5	159	372.012		5	217	532.701		5	203	570.441		5	212	610.955
5	160	385.398		5	218	520.958		5	204	566.762		5	213	609.107
5	161	372.712		5	219	493.908		5	205	551.252		5	214	660.916
5	162	356.05		5	220	499.647		5	206	484.013		5	215	551.359
5	163	359.737		5	221	544.104		5	207	525.757		5	216	626.694
5	164	363.608		5	222	510.808		5	208	536.387		5	217	643.493
5	165	380.933		5	223	562.701		5	209	513.924		5	218	630.368
5	166	389.14		5	224	474.916		5	210	528.262		5	219	605.167
5	167	367.874		5	225	511.328		5	211	536.415		5	220	626.871
5	168	314.805		5	226	513.048		5	212	516.453		5	221	633.945
5	169	370.531		5	227	504.616		5	213	505.275		5	222	650.915
5	170	416.428		5	228	526.239		5	214	524.094		5	223	645.344
5	171	408.355		5	229	518.74		5	215	489.248		5	224	632.097
5	172	380.466		5	230	495.481		5	216	519.756		5	225	656.703
5	173	401.544		5	231	474.813		5	217	509.082		5	226	655.093
5	174	393.536		5	232	496.321		5	218	499.344		5	227	630.593
5	175	383.133		5	233	563.675		5	219	512.633		5	228	617.81
5	176	351.582		5	234	525.917		5	220	541.455		5	229	645.454
5	177	401.634		5	235	524.903		5	221	545.691		5	230	601.785
5	178	375.029		5	236	504.388		5	222	555.811		5	231	598.274
5	179	363.275		5	237	514.887		5	223	547.517		5	232	610.773
5	180	401.017		5	238	496.253		5	224	564.488		5	233	616.104
5	181	402.38		5	239	500.919		5	225	495.865		5	234	606.474
5	182	398.325		5	240	547.039		5	226	536.803		5	235	652.582
5	183	388.977		5	241	515.125		5	227	598.86		5	236	584.5
5	184	371.895		5	242	528.946		5	228	514.299		5	237	625.204
5	185	353.194		5	243	486.628		5	229	523.537		5	238	637.727
5	186	373.321		5	244	467.79		5	230	500.138		5	239	627.635
5	187	348.923		5	245	523.596		5	231	514.794		5	240	590.748
5	188	381.603		5	246	514.898		5	232	484.111		5	241	596.326
5	189	387.036		5	247	493.355		5	233	572.576		5	242	673.987
5	190	376.135		5	248	539		5	234	479.055		5	243	637.588
5	191	364.695		5	249	542.69		5	235	504.13		5	244	651.979
5	192	352.04		5	250	527.677		5	236	486.537		5	245	622.579
5	193	366.514		5	251	468.521		5	237	540.8		5	246	588.892
5	194	359.091		5	252	483.403		5	238	555.715		5	247	642.914
5	195	332.47		5	253	496.903		5	239	545.747		5	248	615.445
5	196	370.716		5	254	508.789		5	240	516.262		5	249	633.159
5	197	372.605		5	255	476.682		5	241	542.637		5	250	632.99
5	198	342.534		5	256	484.535		5	242	529.472		5	251	635.219
5	199	345.856		5	257	507.048		5	243	492.419		5	252	623.163
5	200	345.443		5	258	515.066		5	244	528.099		5	253	603.916
5	201	350.063		5	259	509.748		5	245	489.564		5	254	645.744
5	202	365.615		5	260	561.541		5	246	560.916		5	255	608.282
5	203	382.761		5	261	551.204		5	247	564.151		5	256	610.905
5	204	351.855		5	262	504.92		5	248	549.389		5	257	606.243
5	205	378.462		5	263	503.274		5	249	512.828		5	258	669.458
5	206	365.114		5	264	461.959		5	250	554.588		5	259	669.602
5	207	326.507		5	265	519.466		5	251	546.032		5	260	678.332
5	208	416.677		5	266	503.451		5	252	517.802		5	261	604.92
5	209	377.702		5	267	526.073		5	253	518.715		5	262	620.617
5	210	374.369		5	268	505.201		5	254	550.748		5	263	638.47
5	211	346.445		5	269	499.024		5	255	488.393		5	264	641.846
5	212	374.937		5	270	473.234		5	256	526.872		5	265	622.775
5	213	366.557		5	271	546.267		5	257	525.086		5	266	613.446
5	214	377.944		5	272	523.893		5	258	515.391		5	267	623.997
5	215	361.5		5	273	517.314		5	259	483.467		5	268	617.832
5	216	326.829		5	274	486.16		5	260	487.165		5	269	603.509
5	217	322.301		5	275	500.935		5	261	529.327		5	270	621.289
5	218	356.503		5	276	516.398		5	262	540.456		5	271	678.429
5	219	351.083		5	277	479.292		5	263	496.241		5	272	566.355
5	220	366.93		5	278	519.373		5	264	520.002		5	273	600.219
5	221	371.783		5	279	511.454		5	265	472.76		5	274	626.728
5	222	385.039		5	280	516.005		5	266	528.113		5	275	666.547
5	223	408.523		5	281	538.931		5	267	542.519		5	276	611.237
5	224	367.042		5	282	499.755		5	268	517.846		5	277	646.94
5	225	379.368		5	283	499.264		5	269	557.884		5	278	662.065
5	226	355.349		5	284	485.336		5	270	547.401		5	279	667.311
5	227	392.761		5	285	504.532		5	271	509.393		5	280	678.581
5	228	390.506		5	286	544.672		5	272	474.545		5	281	649.258
5	229	367.815		5	287	521.978		5	273	543.281		5	282	615.345
5	230	341.534		5	288	524.839		5	274	552.968		5	283	592.54
5	231	399.528		5	289	512.856		5	275	516.594		5	284	605.806
5	232	380.399		5	290	506.751		5	276	536.574		5	285	623.348
5	233	342.531		5	291	482.859		5	277	520.854		5	286	610.699
5	234	369.132		5	292	506.01		5	278	506.299		5	287	659.872
5	235	340.836		5	293	535.492		5	279	499.73		5	288	612.811
5	236	359.462		5	294	516.119		5	280	514.257		5	289	611.344
5	237	373.018		5	295	461.783		5	281	539.715		5	290	652.248
5	238	396.263		5	296	514.339		5	282	516.58		5	291	613.455
5	239	354.087		5	297	469.951		5	283	536.282		5	292	566.054
5	240	358.689		5	298	478.55		5	284	493.231		5	293	617.48
5	241	359.665		5	299	550.523		5	285	523.456		5	294	568.907
5	242	388.047		5	300	524.558		5	286	508.894		5	295	640.919
5	243	386.18		5	301	486.842		5	287	480.156		5	296	625.964
5	244	386.504		5	302	536.135		5	288	512.06		5	297	654.708
5	245	383.606		5	303	553.157		5	289	507.345		5	298	576.409
5	246	373.27		5	304	498.085		5	290	550.766		5	299	651.255
5	247	394.725		5	305	499.15		5	291	569.305		5	300	658.922
5	248	374.422		5	306	523.029		5	292	520.701		5	301	645.408
5	249	354.768		5	307	499.852		5	293	497.443		5	302	639.686
5	250	381.281		5	308	500.859		5	294	488.133		5	303	629.866
5	251	338.569		5	309	496.723		5	295	480.987		5	304	661.741
5	252	353.71		5	310	491.755		5	296	515.916		5	305	613.87
5	253	361.512		5	311	524.38		5	297	535.435		5	306	597.318
5	254	394.477		5	312	496.885		5	298	497.781		5	307	616.897
5	255	383.112		5	313	528.802		5	299	583.118		5	308	623.54
5	256	369.485		5	314	528.935		5	300	549.396		5	309	606.798
5	257	376.871		5	315	524.228		5	301	551.966		5	310	618.325
5	258	391.704		5	316	471.467		5	302	534.96		5	311	627.84
5	259	370.576		5	317	508.922		5	303	525.708		5	312	587.749
5	260	365.069		5	318	526.346		5	304	504.7		5	313	617.396
5	261	344.926		5	319	523.567		5	305	495.035		5	314	679.149
5	262	377.251		5	320	524.483		5	306	516.384		5	315	626.511
5	263	383.724		5	321	539.343		5	307	499.324		5	316	611.671
5	264	369.494		5	322	497.812		5	308	508.598		5	317	615.015
5	265	386.708		5	323	509.256		5	309	558.701		5	318	617.026
5	266	368.182		5	324	485.723		5	310	524.862		5	319	563.346
5	267	376.695		5	325	501.111		5	311	525.543		5	320	635.402
5	268	348.957		5	326	456.573		5	312	518.53		5	321	663.194
5	269	345.285		5	327	493.799		5	313	523.358		5	322	616.069
5	270	333.928		5	328	533.524		5	314	574.117		5	323	677.905
5	271	391		5	329	505.447		5	315	526.036		5	324	597.941
5	272	407.864		6	0	453.312		5	316	551.432		5	325	640.378
5	273	360.422		6	1	477.763		5	317	532.306		5	326	606.15
5	274	311.347		6	2	538.604		5	318	507.813		5	327	648.492
5	275	371.205		6	3	512.848		5	319	475.618		5	328	611.156
5	276	355.872		6	4	468.978		5	320	524.34		5	329	627.199
5	277	373.868		6	5	479.829		5	321	492.651		5	330	601.65
5	278	377.083		6	6	509.111		5	322	567.494		5	331	617.061
5	279	334.217		6	7	451.907		5	323	502.321		5	332	621.926
5	280	356.612		6	8	456.312		5	324	515.732		5	333	586.791
5	281	365.338		6	9	495.348		5	325	535.326		5	334	638.578
5	282	334.139		6	10	488.294		5	326	509.082		5	335	650.904
5	283	386.499		6	11	508.879		5	327	572.322		6	0	615.503
5	284	380.556		6	12	510.711		5	328	566.376		6	1	622.139
5	285	329.692		6	13	497.757		5	329	535.775		6	2	637.816
5	286	358.221		6	14	515.054		5	330	562.072		6	3	603.762
5	287	375.611		6	15	491.196		6	0	596.032		6	4	609.976
5	288	346.397		6	16	448.637		6	1	587.518		6	5	618.658
5	289	344.783		6	17	496.633		6	2	568.919		6	6	575.418
5	290	392.741		6	18	487.077		6	3	536.195		6	7	638.659
5	291	394.384		6	19	553.703		6	4	564.352		6	8	601.385
5	292	382.044		6	20	526.039		6	5	556.49		6	9	582.09
5	293	351.862		6	21	532.247		6	6	602.865		6	10	598.008
5	294	336.173		6	22	475.963		6	7	562.201		6	11	648.505
5	295	347.597		6	23	468.708		6	8	613.167		6	12	594.915
5	296	361.155		6	24	473.395		6	9	592.362		6	13	610.679
5	297	356.8		6	25	444.8		6	10	557.143		6	14	654.6
5	298	303.644		6	26	494.197		6	11	590.114		6	15	584.004
5	299	366.668		6	27	473.696		6	12	569.613		6	16	593.548
5	300	346.017		6	28	484.055		6	13	568.257		6	17	629.489
5	301	339.007		6	29	475.109		6	14	590.188		6	18	608.558
5	302	367.812		6	30	499.112		6	15	555.527		6	19	552.76
5	303	362.8		6	31	435.923		6	16	616.362		6	20	608.33
5	304	351.262		6	32	471.375		6	17	574.545		6	21	635.03
5	305	373.505		6	33	476.092		6	18	598.839		6	22	576.685
5	306	369.338		6	34	503.416		6	19	551.572		6	23	654.644
5	307	367.188		6	35	472.046		6	20	532.089		6	24	622.457
5	308	351.233		6	36	516.167		6	21	577.067		6	25	562.428
5	309	343.512		6	37	492.063		6	22	589.988		6	26	589.821
5	310	370.098		6	38	465.732		6	23	606.948		6	27	606.671
5	311	346.675		6	39	485.75		6	24	600.314		6	28	645.915
5	312	398.502		6	40	502.155		6	25	568.713		6	29	600.057
5	313	401.399		6	41	496.626		6	26	557.774		6	30	646.733
5	314	329.148		6	42	485.378		6	27	614.017		6	31	612.719
5	315	390.785		6	43	491.529		6	28	614.337		6	32	587.002
5	316	419.718		6	44	501.942		6	29	574.964		6	33	600.755
5	317	355.437		6	45	498.737		6	30	601.3		6	34	596.685
5	318	417.699		6	46	472.599		6	31	545.304		6	35	615.538
5	319	372.598		6	47	463.257		6	32	584.91		6	36	628.842
5	320	375.293		6	48	476.733		6	33	583.38		6	37	594.707
5	321	362.4		6	49	509.765		6	34	570.324		6	38	579.406
5	322	367.126		6	50	491.504		6	35	584.167		6	39	588.129
5	323	397.069		6	51	453.674		6	36	630.097		6	40	613.942
5	324	345.92		6	52	504.171		6	37	560.127		6	41	619.525
5	325	344.728		6	53	472.18		6	38	567.641		6	42	605.718
5	326	364.788		6	54	490.405		6	39	589.808		6	43	595.711
5	327	340.394		6	55	498.335		6	40	566.884		6	44	687.66
5	328	366.366		6	56	518.559		6	41	513.714		6	45	680.285
5	329	366.726		6	57	475.768		6	42	528.519		6	46	630.428
5	330	378.332		6	58	476.359		6	43	561.629		6	47	584.492
5	331	293.996		6	59	529.323		6	44	584.82		6	48	612.995
5	332	373.236		6	60	529.151		6	45	558.725		6	49	637.837
5	333	382.772		6	61	484.172		6	46	574.487		6	50	611.277
5	334	349.103		6	62	481.845		6	47	548.705		6	51	644.259
5	335	375.272		6	63	459.148		6	48	584.018		6	52	624.55
5	336	365.274		6	64	458.911		6	49	561.352		6	53	601.698
5	337	376.484		6	65	502.508		6	50	553.249		6	54	600.522
5	338	380.499		6	66	435.967		6	51	563.869		6	55	595.674
5	339	376.124		6	67	461.191		6	52	575.736		6	56	614.714
5	340	351.339		6	68	505.067		6	53	558.57		6	57	604.848
6	0	405.608		6	69	508.941		6	54	528.324		6	58	628.851
6	1	421.325		6	70	552.676		6	55	577.926		6	59	664.703
6	2	433.376		6	71	455.507		6	56	539.537		6	60	576.847
6	3	411.796		6	72	505.592		6	57	581.567		6	61	606.401
6	4	416.652		6	73	483.86		6	58	536.233		6	62	637.519
6	5	421.663		6	74	494.958		6	59	596.338		6	63	637.252
6	6	415.7		6	75	518.899		6	60	569.239		6	64	626.853
6	7	430.831		6	76	462.701		6	61	523.471		6	65	669.109
6	8	387.386		6	77	475.941		6	62	562.716		6	66	624.196
6	9	373.276		6	78	515.237		6	63	618.865		6	67	621.059
6	10	383.124		6	79	494.763		6	64	594.738		6	68	625.596
6	11	416.831		6	80	492.337		6	65	593.343		6	69	605.156
6	12	465.5		6	81	498.74		6	66	569.224		6	70	600.619
6	13	423.085		6	82	471.484		6	67	597.268		6	71	599.911
6	14	436.891		6	83	502.718		6	68	565.874		6	72	603.584
6	15	409.093		6	84	587.88		6	69	564.497		6	73	610.452
6	16	419.023		6	85	523.58		6	70	593.93		6	74	627.42
6	17	441.351		6	86	528.65		6	71	547.484		6	75	631.708
6	18	417.321		6	87	517.161		6	72	528.835		6	76	575.602
6	19	432.242		6	88	514.82		6	73	558.936		6	77	559.279
6	20	428.91		6	89	474.735		6	74	551.249		6	78	557
6	21	422.436		6	90	498.539		6	75	595.909		6	79	593.475
6	22	398.708		6	91	488.067		6	76	542.849		6	80	582.45
6	23	396.315		6	92	475.762		6	77	561.635		6	81	598.022
6	24	383.884		6	93	473.412		6	78	580.241		6	82	613.368
6	25	407.829		6	94	494.782		6	79	575.868		6	83	548.547
6	26	434.836		6	95	519.948		6	80	559.061		6	84	562.554
6	27	372.141		6	96	526.043		6	81	545.98		6	85	602.445
6	28	430.683		6	97	494.146		6	82	571.228		6	86	609.526
6	29	378.894		6	98	492.882		6	83	523.746		6	87	629.106
6	30	388.885		6	99	524.135		6	84	610.187		6	88	703.057
6	31	419.456		6	100	529.22		6	85	543.784		6	89	614.16
6	32	396.357		6	101	536.025		6	86	536.01		6	90	620.101
6	33	420.201		6	102	501.372		6	87	562.137		6	91	630.024
6	34	434.662		6	103	454.148		6	88	552.256		6	92	582.051
6	35	468.69		6	104	488.984		6	89	600.827		6	93	595.3
6	36	400.655		6	105	504.34		6	90	565.649		6	94	631.403
6	37	413.155		6	106	470.916		6	91	588.727		6	95	607.268
6	38	429.533		6	107	495.782		6	92	568.716		6	96	588.831
6	39	428.872		6	108	457.013		6	93	577.072		6	97	643.416
6	40	408.059		6	109	495.228		6	94	554.243		6	98	606.174
6	41	435.793		6	110	479.749		6	95	572.736		6	99	619.446
6	42	412.109		6	111	493.143		6	96	592.405		6	100	602.015
6	43	423.53		6	112	484.651		6	97	572.52		6	101	620.517
6	44	412.053		6	113	511.265		6	98	562.584		6	102	625.893
6	45	428.605		6	114	547.165		6	99	613.75		6	103	612.26
6	46	447.179		6	115	511.7		6	100	561.325		6	104	620.344
6	47	451.408		6	116	472.867		6	101	571.924		6	105	611.396
6	48	450.256		6	117	462.022		6	102	564.028		6	106	643.59
6	49	414.156		6	118	513.386		6	103	566.222		6	107	624.082
6	50	444.81		6	119	514.544		6	104	566.44		6	108	606.61
6	51	448.556		6	120	488.627		6	105	560.586		6	109	661.749
6	52	399.035		6	121	492.501		6	106	552.347		6	110	567.167
6	53	426.387		6	122	492.75		6	107	616.565		6	111	634.622
6	54	428.182		6	123	508.029		6	108	610.425		6	112	620.374
6	55	421.22		6	124	539.259		6	109	591.454		6	113	662.416
6	56	407.829		6	125	505.185		6	110	556.339		6	114	626.599
6	57	427.028		6	126	502.855		6	111	574.767		6	115	649.238
6	58	435.557		6	127	509.176		6	112	562.51		6	116	663.207
6	59	402.292		6	128	519.214		6	113	525.753		6	117	647.838
6	60	423.767		6	129	481.949		6	114	549.438		6	118	634.953
6	61	403.86		6	130	461.031		6	115	589.807		6	119	543.403
6	62	458.987		6	131	533.618		6	116	520.595		6	120	557.564
6	63	452.048		6	132	477.395		6	117	567.266		6	121	619.918
6	64	423.443		6	133	511.155		6	118	560.199		6	122	559.139
6	65	427.897		6	134	525.644		6	119	552.291		6	123	526.456
6	66	428.683		6	135	521.224		6	120	546.359		6	124	605.996
6	67	433.237		6	136	461.383		6	121	537.576		6	125	622.638
6	68	422.533		6	137	493.457		6	122	530.457		6	126	615.149
6	69	425.762		6	138	502.603		6	123	555.842		6	127	631.233
6	70	418.863		6	139	517.499		6	124	597.475		6	128	650.974
6	71	439.721		6	140	527.788		6	125	583.809		6	129	608.835
6	72	431.908		6	141	479.734		6	126	547.592		6	130	609.247
6	73	437.046		6	142	505.101		6	127	536.46		6	131	628.197
6	74	453.712		6	143	510.158		6	128	593.592		6	132	582.636
6	75	408.19		6	144	486.631		6	129	539.925		6	133	607.856
6	76	434.893		6	145	492.664		6	130	608.187		6	134	629.262
6	77	402.95		6	146	500.423		6	131	589.078		6	135	624.259
6	78	437.878		6	147	484.337		6	132	564.602		6	136	667.793
6	79	473.433		6	148	529.048		6	133	541.087		6	137	603.23
6	80	438.23		6	149	503.321		6	134	588.36		6	138	648.503
6	81	449.352		6	150	506.948		6	135	547.223		6	139	635.345
6	82	431.884		6	151	489.726		6	136	572.353		6	140	616.197
6	83	408.09		6	152	461.391		6	137	579.423		6	141	574.586
6	84	384.56		6	153	473.685		6	138	566.254		6	142	598.446
6	85	435.168		6	154	489.734		6	139	588.634		6	143	582.341
6	86	385.787		6	155	424.685		6	140	609.174		6	144	665.942
6	87	415.255		6	156	466.279		6	141	569.127		6	145	622.909
6	88	429.733		6	157	475.806		6	142	554.636		6	146	659.616
6	89	446.605		6	158	422.854		6	143	602.91		6	147	619.206
6	90	416.011		6	159	483.512		6	144	584.327		6	148	609.637
6	91	386.399		6	160	550.112		6	145	598.58		6	149	620.589
6	92	409.785		6	161	504.194		6	146	580.724		6	150	618.916
6	93	376.777		6	162	500.112		6	147	591.107		6	151	602.317
6	94	424.212		6	163	546.374		6	148	569.055		6	152	550.019
6	95	428.052		6	164	492.625		6	149	578.85		6	153	606.091
6	96	403.071		6	165	457.707		6	150	610.097		6	154	586.753
6	97	418.045		6	166	490.482		6	151	571.211		6	155	600.347
6	98	462.178		6	167	505.71		6	152	553.924		6	156	565.705
6	99	385.838		6	168	484.837		6	153	571.26		6	157	643.369
6	100	417.011		6	169	463.113		6	154	607.322		6	158	612.255
6	101	427.751		6	170	476.955		6	155	576.85		6	159	594.04
6	102	414.628		6	171	495.343		6	156	565.936		6	160	595.36
6	103	448.23		6	172	525.288		6	157	568.555		6	161	637.489
6	104	418.745		6	173	469.721		6	158	552.728		6	162	587.603
6	105	446.441		6	174	494.323		6	159	583.383		6	163	620.326
6	106	421.542		6	175	465.329		6	160	549.112		6	164	595.655
6	107	433.814		6	176	525.106		6	161	556.735		6	165	568.211
6	108	402.537		6	177	510.78		6	162	560.768		6	166	615.032
6	109	420.834		6	178	455.472		6	163	556.284		6	167	612.845
6	110	412.614		6	179	508.269		6	164	532.637		6	168	530.801
6	111	433.731		6	180	464.242		6	165	618.933		6	169	562.416
6	112	436.379		6	181	458.426		6	166	585.668		6	170	636.518
6	113	439.873		6	182	489.119		6	167	605.877		6	171	647.463
6	114	404.537		6	183	455.9		6	168	590.23		6	172	606.787
6	115	442.676		6	184	487.219		6	169	584.225		6	173	630.689
6	116	418.853		6	185	507.621		6	170	585.904		6	174	607.618
6	117	369.418		6	186	524.552		6	171	540.255		6	175	636.315
6	118	366.661		6	187	505.122		6	172	543.33		6	176	615.36
6	119	428.185		6	188	459.736		6	173	538.295		6	177	644.178
6	120	412.511		6	189	473.369		6	174	579.913		6	178	615.718
6	121	443.505		6	190	493.61		6	175	571.586		6	179	617.666
6	122	428.852		6	191	489.811		6	176	601.372		6	180	594.797
6	123	415.485		6	192	507.696		6	177	592.309		6	181	575.035
6	124	399.361		6	193	510.891		6	178	541.001		6	182	580.558
6	125	403.613		6	194	456.721		6	179	560.211		6	183	653.838
6	126	439.742		6	195	494.229		6	180	580.47		6	184	637.411
6	127	425.863		6	196	495.815		6	181	550.381		6	185	649.794
6	128	438.711		6	197	516.865		6	182	535.824		6	186	583.382
6	129	398.271		6	198	482.408		6	183	528.844		6	187	627.251
6	130	393.283		6	199	524.895		6	184	580.368		6	188	608.62
6	131	390.109		6	200	511.754		6	185	569.316		6	189	644.121
6	132	424.64		6	201	496.258		6	186	593.959		6	190	623.974
6	133	429.328		6	202	486.854		6	187	582.886		6	191	617.199
6	134	409.74		6	203	510.89		6	188	534.175		6	192	581.326
6	135	438.093		6	204	527.395		6	189	583.82		6	193	572.887
6	136	471.859		6	205	500.646		6	190	558.849		6	194	623.68
6	137	404.672		6	206	487.592		6	191	584.929		6	195	652.61
6	138	412.803		6	207	459.345		6	192	594.167		6	196	645.806
6	139	419.366		6	208	461.325		6	193	570.572		6	197	675.772
6	140	410.942		6	209	477.46		6	194	538.774		6	198	591.916
6	141	455.036		6	210	524.46		6	195	577.867		6	199	551.968
6	142	426.292		6	211	505.673		6	196	560.586		6	200	581.509
6	143	441.311		6	212	491.821		6	197	559.56		6	201	628.347
6	144	404.195		6	213	501.41		6	198	574.05		6	202	642.081
6	145	419.05		6	214	485.52		6	199	558.492		6	203	617.679
6	146	401.333		6	215	476.255		6	200	569.841		6	204	628.73
6	147	455.018		6	216	503.574		6	201	582.737		6	205	639.089
6	148	443.808		6	217	490.043		6	202	548.742		6	206	639.521
6	149	448.294		6	218	495.828		6	203	622.094		6	207	628.435
6	150	367.369		6	219	480.182		6	204	582.303		6	208	617.25
6	151	397.81		6	220	484.768		6	205	584.993		6	209	563.508
6	152	400.584		6	221	419.209		6	206	589.739		6	210	592.755
6	153	398.719		6	222	447.05		6	207	598.888		6	211	618.168
6	154	406.138		6	223	506.933		6	208	573.587		6	212	590.906
6	155	340.654		6	224	493.313		6	209	586.413		6	213	557.945
6	156	420.37		6	225	528.605		6	210	551.521		6	214	555.005
6	157	396.783		6	226	448.563		6	211	572.682		6	215	572.008
6	158	428.52		6	227	458.781		6	212	543.574		6	216	582.117
6	159	429.514		6	228	484.053		6	213	572.927		6	217	621.987
6	160	410.188		6	229	499.179		6	214	566.527		6	218	575.601
6	161	402.584		6	230	437.5		6	215	572.262		6	219	581.841
6	162	435.47		6	231	487.119		6	216	588.075		6	220	585.138
6	163	406.395		6	232	576.465		6	217	560.072		6	221	562.375
6	164	428.311		6	233	481.384		6	218	608.005		6	222	630.709
6	165	418.581		6	234	460.758		6	219	588.622		6	223	626.448
6	166	414.249		6	235	485.992		6	220	604.619		6	224	626.223
6	167	442.389		6	236	502.278		6	221	543.073		6	225	657.385
6	168	394.683		6	237	491.304		6	222	613.682		6	226	634.673
6	169	382.181		6	238	498.97		6	223	595.725		6	227	644.661
6	170	431.27		6	239	514.974		6	224	575.625		6	228	621.098
6	171	422.815		6	240	433.295		6	225	595.622		6	229	636.769
6	172	410.17		6	241	483.221		6	226	622.158		6	230	593.397
6	173	420.8		6	242	487.205		6	227	588.32		6	231	599.121
6	174	390.897		6	243	437.246		6	228	589.322		6	232	601.592
6	175	422.369		6	244	518.021		6	229	581.876		6	233	629.67
6	176	389.878		6	245	475.722		6	230	595.804		6	234	600.211
6	177	415.262		6	246	424.508		6	231	585.381		6	235	625.295
6	178	431.672		6	247	491.524		6	232	561.989		6	236	591.864
6	179	417.019		6	248	461.851		6	233	582.09		6	237	576.37
6	180	414.721		6	249	467.084		6	234	598.114		6	238	608.447
6	181	411.688		6	250	457.238		6	235	587.81		6	239	606.743
6	182	425.464		6	251	497.966		6	236	560.558		6	240	668.147
6	183	461.247		6	252	530.25		6	237	551.762		6	241	608.321
6	184	407.549		6	253	479.462		6	238	577.036		6	242	591.459
6	185	407.483		6	254	495.645		6	239	561.352		6	243	645.391
6	186	441.692		6	255	484.67		6	240	596.945		6	244	599.756
6	187	461.448		6	256	468.655		6	241	543.462		6	245	586.355
6	188	437.302		6	257	489.468		6	242	585.596		6	246	576.922
6	189	403.332		6	258	520.364		6	243	596.872		6	247	608.098
6	190	437.714		6	259	497.826		6	244	553.265		6	248	605.835
6	191	415.806		6	260	472.283		6	245	598.625		6	249	624.565
6	192	448.083		6	261	485.296		6	246	602.367		6	250	611.078
6	193	417.876		6	262	502.467		6	247	549.97		6	251	564.642
6	194	404.728		6	263	496.748		6	248	544.804		6	252	660.142
6	195	418.494		6	264	482.097		6	249	583.416		6	253	647.174
6	196	438.053		6	265	494.809		6	250	559.987		6	254	630.286
6	197	416.306		6	266	476.893		6	251	574.594		6	255	554.231
6	198	430.858		6	267	460.505		6	252	612.083		6	256	605.21
6	199	419.72		6	268	471.479		6	253	631.442		6	257	578.905
6	200	433.327		6	269	506.784		6	254	614.199		6	258	615.735
6	201	430.487		6	270	439.281		6	255	604.528		6	259	661.944
6	202	437.765		6	271	474.101		6	256	594.211		6	260	651.717
6	203	388.729		6	272	504.096		6	257	612.177		6	261	612.72
6	204	436.98		6	273	514.788		6	258	613.398		6	262	605.224
6	205	413.572		6	274	453.258		6	259	567.335		6	263	628.641
6	206	412.39		6	275	478.475		6	260	614.593		6	264	593.645
6	207	412.954		6	276	527.317		6	261	570.329		6	265	594.577
6	208	413.243		6	277	470.118		6	262	597.07		6	266	611.97
6	209	380.794		6	278	493.64		6	263	566.518		6	267	653.818
6	210	456.996		6	279	485.352		6	264	576.43		6	268	593.907
6	211	405.407		6	280	463.196		6	265	557.386		6	269	599.498
6	212	443.529		6	281	527.691		6	266	543.346		6	270	593.807
6	213	422.363		6	282	489.808		6	267	584.059		6	271	589.803
6	214	410.546		6	283	518.206		6	268	568.018		6	272	651.425
6	215	405.306		6	284	515.539		6	269	569.601		6	273	606.888
6	216	427.054		6	285	550.929		6	270	537.394		6	274	594.93
6	217	432.454		6	286	540.547		6	271	597.339		6	275	581.486
6	218	422.529		6	287	535.565		6	272	590.364		6	276	645.494
6	219	419.603		6	288	532.252		6	273	572.688		6	277	660.782
6	220	426.755		6	289	478.465		6	274	561.027		6	278	558.356
6	221	425.679		6	290	517.319		6	275	540.876		6	279	577.59
6	222	449.269		6	291	494.569		6	276	566.656		6	280	589.368
6	223	426.575		6	292	464.529		6	277	596.785		6	281	609.327
6	224	398.006		6	293	507.246		6	278	612.037		6	282	626.091
6	225	426.33		6	294	532.792		6	279	604.24		6	283	595.046
6	226	439.638		6	295	499.736		6	280	584.952		6	284	600.582
6	227	387.776		6	296	530.621		6	281	572.556		6	285	618.004
6	228	398.387		6	297	462.169		6	282	563.011		6	286	631.885
6	229	405.739		6	298	520.02		6	283	605.849		6	287	620.202
6	230	372.918		6	299	523.236		6	284	619.078		6	288	630.991
6	231	395.18		6	300	504.973		6	285	575.215		6	289	631.465
6	232	407.886		6	301	513.491		6	286	554.062		6	290	634.736
6	233	434.729		6	302	458.298		6	287	569.017		6	291	627.006
6	234	378.313		6	303	489.371		6	288	588		6	292	537.674
6	235	427.177		6	304	520.145		6	289	572.09		6	293	609.463
6	236	417.218		6	305	509.388		6	290	591.135		6	294	604.041
6	237	435.181		6	306	519.117		6	291	572.045		6	295	667.617
6	238	416.941		6	307	473.248		6	292	594.709		6	296	646.656
6	239	448.761		6	308	494.416		6	293	585.056		6	297	609.822
6	240	441.644		6	309	497.31		6	294	539.852		6	298	629.681
6	241	398.04		6	310	487.9		6	295	556.775		6	299	642.975
6	242	429.734		6	311	480.43		6	296	578.117		6	300	587.127
6	243	408.667		6	312	497.998		6	297	564.407		6	301	651.476
6	244	384.996		6	313	523.948		6	298	598.651		6	302	624.967
6	245	407.165		6	314	538.743		6	299	583.773		6	303	611.479
6	246	399.554		6	315	521.085		6	300	608.778		6	304	573.342
6	247	393.879		6	316	553.407		6	301	617.667		6	305	599.462
6	248	423.907		6	317	502.19		6	302	606.395		6	306	653.873
6	249	418.375		6	318	470.004		6	303	591.201		6	307	575.775
6	250	438.171		6	319	493.058		6	304	586.016		6	308	645.449
6	251	409.154		6	320	538.898		6	305	581.838		6	309	627.253
6	252	423.087		6	321	503.285		6	306	576.814		6	310	631.376
6	253	425.331		6	322	475.747		6	307	536.471		6	311	578.441
6	254	397.97		6	323	509.662		6	308	574.868		6	312	598.327
6	255	400.982		6	324	500.479		6	309	581.871		6	313	627.434
[truncated: 11,350 more rows]

## Sheet: Experiment_gauss
Simulation	gaussian fitting
398 nm				501 nm				599 nm				658 nm
video_id	frame_id	estimated sigma		video_id	frame_id	estimated sigma		video_id	frame	estimated sigma		video_id	frame	estimated sigma
1	0	165.174		1	0	196.729		1	0	220.463		1	0	254.697
1	1	169.514		1	1	196.187		1	1	230.321		1	1	258.799
1	2	190.734		1	2	195.277		1	2	228.544		1	2	223.991
1	3	178.045		1	3	192.252		1	3	218.584		1	3	239.636
1	4	164.236		1	4	204.645		1	4	224.184		1	4	241.133
1	5	178.412		1	5	195.904		1	5	224.599		1	5	240.896
1	6	185.025		1	6	198.555		1	6	234.747		1	6	239.986
1	7	188.065		1	7	199.597		1	7	227.369		1	7	244.847
1	8	177.782		1	8	194.199		1	8	225.956		1	8	241.771
1	9	164.678		1	9	190.43		1	9	216.509		1	9	239.764
1	10	169.805		1	10	187.896		1	10	238.154		1	10	221.28
1	11	178.495		1	11	192.967		1	11	225.5		1	11	241.823
1	12	174.1		1	12	190.724		1	12	219.732		1	12	237.02
1	13	180.303		1	13	192.486		1	13	226.138		1	13	233.448
1	14	169.167		1	14	206.682		1	14	222.953		1	14	256.762
1	15	163.071		1	15	187.801		1	15	224.219		1	15	257.823
1	16	188.334		1	16	191.696		1	16	224.643		1	16	247.343
1	17	186.687		1	17	186.805		1	17	219.912		1	17	242.541
1	18	184.736		1	18	198.484		1	18	231.882		1	18	246.059
1	19	195.922		1	19	210.885		1	19	236.919		1	19	244.41
1	20	190.22		1	20	197.989		1	20	224.786		1	20	252.57
1	21	186.538		1	21	189.46		1	21	219.007		1	21	259.296
1	22	179.648		1	22	193.175		1	22	224.856		1	22	260.085
1	23	179.51		1	23	194.388		1	23	212.093		1	23	238.359
1	24	190.727		1	24	202.714		1	24	223.044		1	24	237.667
1	25	189.738		1	25	201.146		1	25	220.516		1	25	238.78
1	26	179.202		1	26	190.364		1	26	234.49		1	26	261.21
1	27	175.336		1	27	195.766		1	27	228.265		1	27	238.863
1	28	184.049		1	28	192.693		1	28	233.422		1	28	232.797
1	29	179.822		1	29	192.619		1	29	235.081		1	29	247.115
1	30	166.724		1	30	182.735		1	30	229.847		1	30	247.943
1	31	173.299		1	31	195.413		1	31	224.86		1	31	244.532
1	32	167.899		1	32	192.121		1	32	218.776		1	32	251.349
1	33	176.405		1	33	195.223		1	33	221.794		1	33	243.001
1	34	193.139		1	34	195.26		1	34	218.404		1	34	234.191
1	35	185.653		1	35	186.463		1	35	215.116		1	35	234.555
1	36	178.47		1	36	187.817		1	36	229.898		1	36	243.833
1	37	173.418		1	37	192.523		1	37	244.892		1	37	244.859
1	38	169.348		1	38	191.919		1	38	215.85		1	38	242.389
1	39	180.02		1	39	210.428		1	39	223.013		1	39	233.665
1	40	186.18		1	40	199.074		1	40	229.818		1	40	242.49
1	41	173.715		1	41	191.945		1	41	227.974		1	41	241.402
1	42	180.266		1	42	193.471		1	42	220.443		1	42	247.011
1	43	172.316		1	43	187.917		1	43	228.408		1	43	251.804
1	44	177.924		1	44	175.617		1	44	223.487		1	44	230.526
1	45	194.907		1	45	186.539		1	45	216.91		1	45	245.43
1	46	173.977		1	46	198.186		1	46	235.68		1	46	244.653
1	47	185.512		1	47	203.944		1	47	233.62		1	47	250.344
1	48	186.946		1	48	203.219		1	48	234.704		1	48	224.028
1	49	187.836		1	49	185.752		1	49	232.675		1	49	234.916
1	50	169.227		1	50	196.766		1	50	231.358		1	50	255.006
1	51	180.295		1	51	185.086		1	51	228.509		1	51	256.052
1	52	183.833		1	52	197.808		1	52	224.493		1	52	237.915
1	53	176.432		1	53	191.037		1	53	223.138		1	53	244.85
1	54	162.089		1	54	192.921		1	54	212.127		1	54	239.926
1	55	168.08		1	55	196.604		1	55	220.735		1	55	249.084
1	56	173.362		1	56	191.207		1	56	222.6		1	56	243.732
1	57	181.076		1	57	191.167		1	57	224.588		1	57	246.651
1	58	182.285		1	58	199.03		1	58	225.083		1	58	247.502
1	59	170.653		1	59	189.864		1	59	240.046		1	59	242.175
1	60	162.867		1	60	191		1	60	222.815		1	60	229.502
1	61	174.082		1	61	186.017		1	61	228.716		1	61	227.699
1	62	169.832		1	62	187.782		1	62	230.955		1	62	243.552
1	63	186.62		1	63	194.666		1	63	236.279		1	63	242.496
1	64	178.304		1	64	190.309		1	64	230.032		1	64	247.318
1	65	168.185		1	65	197.885		1	65	228.556		1	65	248.421
1	66	170.881		1	66	191.715		1	66	232.335		1	66	244.673
1	67	168.536		1	67	201.173		1	67	231.222		1	67	243.2
1	68	171.882		1	68	191.616		1	68	218.473		1	68	236.189
1	69	171.309		1	69	191.461		1	69	214.381		1	69	244.056
1	70	171.778		1	70	195.522		1	70	230.492		1	70	241.336
1	71	180.136		1	71	181.686		1	71	233.797		1	71	239.557
1	72	163.035		1	72	185.178		1	72	234.901		1	72	247.137
1	73	173.005		1	73	196.567		1	73	243.947		1	73	259.66
1	74	177.693		1	74	199.659		1	74	238.543		1	74	261.741
1	75	180.962		1	75	202.003		1	75	221.004		1	75	235.745
1	76	182.968		1	76	205.463		1	76	210.653		1	76	236.188
1	77	187.987		1	77	190.332		1	77	216.216		1	77	231.599
1	78	170.227		1	78	195.407		1	78	225.858		1	78	225.861
1	79	186.058		1	79	187.923		1	79	231.972		1	79	249.802
1	80	169.941		1	80	188.188		1	80	233.577		1	80	242.159
1	81	183.069		1	81	184.469		1	81	227.084		1	81	242.794
1	82	158.647		1	82	204.822		1	82	219.702		1	82	246.984
1	83	173.859		1	83	190.943		1	83	224.315		1	83	233.995
1	84	173.474		1	84	174.578		1	84	230.903		1	84	242.92
1	85	170.782		1	85	188.181		1	85	230.688		1	85	221.121
1	86	185.194		1	86	184.053		1	86	216.098		1	86	232.447
1	87	173.526		1	87	184.158		1	87	220.953		1	87	229.295
1	88	181.839		1	88	194.311		1	88	226.504		1	88	242.499
1	89	173.915		1	89	194.612		1	89	231.298		1	89	245.059
1	90	178.608		1	90	194.543		1	90	225.553		1	90	243.051
1	91	174.54		1	91	202.985		1	91	234.511		1	91	244.074
1	92	186.066		1	92	186.038		1	92	213.882		1	92	247.913
1	93	185.859		1	93	186.881		1	93	223.714		1	93	246.891
1	94	179.759		1	94	194.815		1	94	226.309		1	94	239.496
1	95	184.916		1	95	200.572		1	95	222.677		1	95	244.069
1	96	175.261		1	96	190.608		1	96	215.768		1	96	244.149
1	97	164.882		1	97	199.001		1	97	222.348		1	97	233.548
1	98	171.774		1	98	198.136		1	98	213.437		1	98	250.798
1	99	172.84		1	99	178.537		1	99	220.239		1	99	243.269
1	100	172.777		1	100	180.18		1	100	221.93		1	100	240.392
1	101	174.562		1	101	179.266		1	101	228.951		1	101	246.803
1	102	176.81		1	102	188.023		1	102	218.261		1	102	257.563
1	103	169.259		1	103	198.277		1	103	211.514		1	103	224.95
1	104	184.404		1	104	188.273		1	104	230.918		1	104	240.232
1	105	183.109		1	105	186.502		1	105	221.601		1	105	250.206
1	106	179.636		1	106	191.933		1	106	223.73		1	106	260.208
1	107	186.286		1	107	196.391		1	107	222.987		1	107	246.152
1	108	172.435		1	108	196.033		1	108	220.192		1	108	237.993
1	109	174.796		1	109	188.844		1	109	224.127		1	109	248.072
1	110	169.74		1	110	194.926		1	110	221.847		1	110	242.153
1	111	182.493		1	111	192.504		1	111	231.309		1	111	263.89
1	112	190.686		1	112	194.42		1	112	223.099		1	112	244.434
1	113	186.224		1	113	191.472		1	113	225.234		1	113	238.748
1	114	173.978		1	114	187.271		1	114	226.292		1	114	249.52
1	115	173.728		1	115	185.579		1	115	220.475		1	115	239.348
1	116	173.749		1	116	196.213		1	116	211.356		1	116	244.442
1	117	180.032		1	117	185.261		1	117	232.352		1	117	254.538
1	118	155.968		1	118	191.42		1	118	230.106		1	118	256.491
1	119	183.082		1	119	190.584		1	119	225.153		1	119	243.242
1	120	176.316		1	120	188.315		1	120	218.581		1	120	244.727
1	121	182.314		1	121	185.993		1	121	230.322		1	121	242.416
1	122	175.975		1	122	181.258		1	122	224.317		1	122	246.741
1	123	173.514		1	123	184.371		1	123	225.327		1	123	231.475
1	124	182.552		1	124	184.997		1	124	232.064		1	124	253.621
1	125	166.463		1	125	183.373		1	125	245.317		1	125	247.155
1	126	192.87		1	126	193.878		1	126	215.019		1	126	245.19
1	127	179.385		1	127	197.399		1	127	235.13		1	127	234.423
1	128	173.53		1	128	192.617		1	128	223.363		1	128	237.687
1	129	186.675		1	129	208.017		1	129	241.293		1	129	261.396
1	130	185.996		1	130	191.596		1	130	228.149		1	130	239.066
1	131	178.668		1	131	188.892		1	131	222.34		1	131	237.684
1	132	185.403		1	132	201.255		1	132	219.035		1	132	239.441
1	133	179.515		1	133	187.242		1	133	230.593		1	133	246.209
1	134	170.074		1	134	188.154		1	134	234.793		1	134	247.407
1	135	178.749		1	135	186.35		1	135	233.609		1	135	230.384
1	136	166.154		1	136	197.814		1	136	223.444		1	136	240.673
1	137	177.433		1	137	193.425		1	137	216.429		1	137	250.159
1	138	174.334		1	138	187.963		1	138	230.556		1	138	246.488
1	139	171.757		1	139	186.145		1	139	231.79		1	139	245.272
1	140	174.52		1	140	192.209		1	140	232.123		1	140	240.169
1	141	160.644		1	141	187.644		1	141	220.591		1	141	239.691
1	142	180.978		1	142	193.213		1	142	222.38		1	142	254.566
1	143	190.697		1	143	198.112		1	143	223.255		1	143	251.297
1	144	189.339		1	144	193.265		1	144	225.364		1	144	231.603
1	145	180.823		1	145	183.799		1	145	225.905		1	145	230.475
1	146	171.567		1	146	188.855		1	146	233.879		1	146	253.449
1	147	171.313		1	147	191.516		1	147	239.638		1	147	240.497
1	148	176.885		1	148	194.651		1	148	228.138		1	148	241.649
1	149	179.235		1	149	208.734		1	149	233.399		1	149	236.858
1	150	176.655		1	150	190.639		1	150	223.237		1	150	255.369
1	151	186.152		1	151	194.536		1	151	231.047		1	151	247.137
1	152	180.541		1	152	194.792		1	152	227.329		1	152	244.361
1	153	180.68		1	153	186.627		1	153	232.791		1	153	243.468
1	154	180.885		1	154	188.528		1	154	234.784		1	154	233.255
1	155	170.24		1	155	194.914		1	155	234.259		1	155	243.48
1	156	155.964		1	156	197.772		1	156	231.691		1	156	247.239
1	157	169.521		1	157	191.672		1	157	222.661		1	157	232.828
1	158	169.634		1	158	185.692		1	158	220.256		1	158	250.917
1	159	167.324		1	159	191.431		1	159	234.619		1	159	244.754
1	160	180.675		1	160	181.937		1	160	218.649		1	160	239.785
1	161	174.45		1	161	189.471		1	161	229.637		1	161	238.333
1	162	173.948		1	162	173.106		1	162	225.138		1	162	244.477
1	163	186.038		1	163	180.636		1	163	230.911		1	163	234.217
1	164	176.65		1	164	190.015		1	164	221.415		1	164	238.862
1	165	172.008		1	165	192.248		1	165	214.071		1	165	230.249
1	166	166.968		1	166	188.798		1	166	221.002		1	166	247.093
1	167	183.593		1	167	195.991		1	167	215.809		1	167	247.389
1	168	174.61		1	168	189.437		1	168	223.355		1	168	250.385
1	169	186.152		1	169	186.451		1	169	217.023		1	169	248.725
1	170	165.164		1	170	176.718		1	170	230.921		1	170	255.105
1	171	181.622		1	171	182.152		1	171	208.96		1	171	262.902
1	172	179.969		1	172	191.726		1	172	233.279		1	172	251.713
1	173	182.98		1	173	192.151		1	173	228.029		1	173	254.332
1	174	173.753		1	174	188.262		1	174	222.171		1	174	248.185
1	175	186.061		1	175	183.923		1	175	218.861		1	175	240.771
1	176	194.643		1	176	187.934		1	176	225.5		1	176	244.818
1	177	173.852		1	177	189.816		1	177	232.12		1	177	252.498
1	178	172.943		1	178	195.485		1	178	224.376		1	178	250.117
1	179	183.809		1	179	205.415		1	179	223.363		1	179	247.074
1	180	167.357		1	180	198.905		1	180	223.952		1	180	241.849
1	181	177.648		1	181	193.313		1	181	221.766		1	181	251.636
1	182	179.995		1	182	185.837		1	182	228.454		1	182	249.216
1	183	183.678		1	183	186.882		1	183	221.11		1	183	235.071
1	184	184.798		1	184	187.527		1	184	226.198		1	184	246.99
1	185	185.652		1	185	190.641		1	185	231.617		1	185	242.262
1	186	171.156		1	186	193.837		1	186	229.146		1	186	244.39
1	187	186.65		1	187	186.373		1	187	235.245		1	187	244.736
1	188	183.409		1	188	188.55		1	188	227.9		1	188	247.107
1	189	178.031		1	189	196.619		1	189	224.649		1	189	235.337
1	190	182.953		1	190	200.918		1	190	235.529		1	190	242.636
1	191	173.202		1	191	186.304		1	191	213.447		1	191	244.655
1	192	179.436		1	192	189.646		1	192	220.31		1	192	240.497
1	193	179.571		1	193	188.08		1	193	221.552		1	193	254.122
1	194	179.613		1	194	189.847		1	194	219.226		1	194	242.93
1	195	175.898		1	195	182.837		1	195	221.814		1	195	241.491
1	196	169.148		1	196	174.783		1	196	225.203		1	196	251.616
1	197	167.887		1	197	185.382		1	197	225.448		1	197	239.747
1	198	179.918		1	198	190.035		1	198	208.429		1	198	260.036
1	199	172.842		1	199	198.964		1	199	212.655		1	199	255.505
1	200	175.318		1	200	192.134		1	200	231.011		1	200	250.336
1	201	172.781		1	201	183.013		1	201	215.117		1	201	249.056
1	202	173.989		1	202	186.378		1	202	225.941		1	202	240.539
1	203	164.915		1	203	189.386		1	203	218.728		1	203	244.144
1	204	158.087		1	204	188.076		1	204	216.352		1	204	253.715
1	205	165.841		1	205	197.116		1	205	222.514		1	205	241.983
1	206	176.516		1	206	186.983		1	206	223.023		1	206	254.537
1	207	183.387		1	207	195.5		1	207	227.287		1	207	252.85
1	208	193.221		1	208	198.476		1	208	242.984		1	208	248.499
1	209	181.799		1	209	197.464		1	209	239.368		1	209	243.865
1	210	180.679		1	210	196.634		1	210	226.38		1	210	228.873
1	211	170.233		1	211	198.495		1	211	222.125		1	211	239.791
1	212	155.748		1	212	193.944		1	212	224.188		1	212	249.617
1	213	167.538		1	213	171.509		1	213	218.135		1	213	247.933
1	214	174.026		1	214	195.375		1	214	218.249		1	214	245.011
1	215	183.698		1	215	196.534		1	215	222.773		1	215	241.693
1	216	182.649		1	216	192.362		1	216	217.66		1	216	255.816
1	217	172.937		1	217	186.967		1	217	221.727		1	217	248.074
1	218	171.117		1	218	188.513		1	218	218.527		1	218	250.952
1	219	166.855		1	219	171.944		1	219	222.009		1	219	253.988
1	220	177.056		1	220	195.16		1	220	230.72		1	220	249.655
1	221	187.379		1	221	184.264		1	221	229.747		1	221	248.893
1	222	179.521		1	222	189.694		1	222	213.345		1	222	257.526
1	223	171.12		1	223	191.264		1	223	231.393		1	223	239.538
1	224	172.899		1	224	193.107		1	224	223.317		1	224	263.837
1	225	178.667		1	225	196.442		1	225	220.845		1	225	260.687
1	226	165.068		1	226	194.068		1	226	218.869		1	226	245.683
1	227	164.726		1	227	196.638		1	227	225.374		1	227	243.803
1	228	192.78		1	228	191.91		1	228	240.097		1	228	260.711
1	229	178.721		1	229	187.096		1	229	228.619		1	229	254.707
1	230	177.357		1	230	188.235		1	230	223.622		1	230	249.68
1	231	178.521		1	231	186.269		1	231	208.655		1	231	251.723
1	232	185.172		1	232	198.121		1	232	210.66		1	232	249.795
1	233	177.047		1	233	186.28		1	233	209.471		1	233	243.828
1	234	171.151		1	234	195.164		1	234	219.424		1	234	253.743
1	235	176.997		1	235	189.698		1	235	226.39		1	235	241.885
1	236	188.162		1	236	197.341		1	236	223.778		1	236	257.97
1	237	182.419		1	237	185.917		1	237	229.051		1	237	250.283
1	238	175.816		1	238	194.389		1	238	234.624		1	238	251.03
1	239	173.925		1	239	183.173		1	239	224.467		1	239	243.189
1	240	172.936		1	240	199.222		1	240	218.233		1	240	241.537
1	241	180.557		1	241	187.51		1	241	236.509		1	241	239.376
1	242	171.242		1	242	199.67		1	242	236.18		1	242	234.386
1	243	175.837		1	243	182.257		1	243	225.391		1	243	251.935
1	244	177.023		1	244	193.217		1	244	214.838		1	244	238.834
1	245	191.519		1	245	195.803		1	245	229.641		1	245	248.338
1	246	181.275		1	246	186.059		1	246	214.593		1	246	245.728
1	247	177.816		1	247	191.172		1	247	222.591		1	247	245.869
1	248	167.288		1	248	194.115		1	248	220.42		1	248	235.52
1	249	184.571		1	249	207.384		1	249	232.513		1	249	246.188
1	250	174.599		1	250	194.613		1	250	230.781		1	250	236.394
1	251	170.981		1	251	189.218		1	251	228.345		1	251	240.525
1	252	169.301		1	252	181.343		1	252	228.277		1	252	244.279
1	253	175.15		1	253	187.733		1	253	212.307		1	253	247.675
1	254	177.683		1	254	191.285		1	254	223.575		1	254	248.059
1	255	184.864		1	255	194.693		1	255	224.064		1	255	240.491
1	256	172.593		1	256	193.044		1	256	217.979		1	256	241.458
1	257	174.316		1	257	194.27		1	257	216.928		1	257	236.548
1	258	185.261		1	258	183.007		1	258	225.165		1	258	261.912
1	259	180.115		1	259	180.891		1	259	241.19		1	259	232.514
1	260	176.133		1	260	178.799		1	260	234.61		1	260	245.526
1	261	177.178		1	261	192.766		1	261	212.719		1	261	250.531
1	262	197.297		1	262	189.421		1	262	221.598		1	262	240.618
1	263	183.591		1	263	175.669		1	263	225.565		1	263	235.075
1	264	160.015		1	264	188.79		1	264	234.717		1	264	249.727
1	265	171.701		1	265	191.11		1	265	223.365		1	265	235.456
1	266	183.847		1	266	204.381		1	266	224.799		1	266	241.566
1	267	174.873		1	267	199.871		1	267	221.69		1	267	227.042
1	268	171.104		1	268	190.446		1	268	213.797		1	268	249.249
1	269	187.672		1	269	196.474		1	269	223.652		1	269	249.762
1	270	180.177		1	270	183.549		1	270	221.793		1	270	241.029
1	271	178.187		1	271	179.398		1	271	225.294		1	271	250.27
1	272	181.508		1	272	191.741		1	272	225.406		1	272	248.135
1	273	182.06		1	273	189.042		1	273	231.571		1	273	239.078
1	274	176.495		1	274	194.861		1	274	232.788		1	274	243.66
1	275	175.064		1	275	189.397		1	275	221.583		1	275	251.315
1	276	160.899		1	276	194.941		1	276	224.003		1	276	243.803
1	277	167.546		1	277	185.01		1	277	229.943		1	277	241.99
1	278	188.437		1	278	194.358		1	278	225.341		1	278	230.265
1	279	172.76		1	279	182.949		1	279	222.566		1	279	241.451
1	280	171.648		1	280	194.41		1	280	210.422		1	280	249.666
1	281	172.169		1	281	195.501		1	281	217.349		1	281	243.912
1	282	189.589		1	282	185.296		1	282	228.078		1	282	241.279
1	283	169.574		1	283	185.898		1	283	221.886		1	283	248.275
1	284	180.462		1	284	186.761		1	284	222.355		1	284	249.558
1	285	185.091		1	285	187.102		1	285	216.735		1	285	239.549
1	286	171.207		1	286	197.396		1	286	233.063		1	286	233.632
1	287	186.669		1	287	190.497		1	287	230.247		1	287	249.993
1	288	177.906		1	288	199.056		1	288	224.733		1	288	250.115
1	289	184.205		1	289	177.037		1	289	216.439		1	289	236.927
1	290	191.862		1	290	194.41		1	290	232.155		1	290	246.838
1	291	191.186		1	291	197.038		1	291	224.36		1	291	259.027
1	292	180.057		1	292	192.303		1	292	233.888		1	292	238.71
1	293	172.428		1	293	209.739		1	293	220.158		1	293	241.71
1	294	179.344		1	294	194.546		1	294	232.349		1	294	246.542
1	295	174.681		1	295	190.371		1	295	231.063		1	295	242.119
1	296	174.326		1	296	190.694		1	296	224.145		1	296	242.13
1	297	187.842		1	297	178.901		1	297	220.095		1	297	236.855
1	298	195.63		1	298	182.849		1	298	228.449		1	298	237.312
1	299	181.356		1	299	201.775		1	299	226.067		1	299	242.939
1	300	168.034		1	300	188.968		1	300	242.655		1	300	244.304
1	301	184.116		1	301	192.107		1	301	228.772		1	301	239.282
1	302	182.287		1	302	196.823		1	302	227.693		1	302	241.774
1	303	185.11		1	303	193.752		1	303	208.25		1	303	236.261
1	304	158.751		1	304	195.295		1	304	220.738		1	304	241.494
1	305	171.439		1	305	182.468		1	305	227.76		1	305	243.89
1	306	181.977		1	306	182.39		1	306	220.997		1	306	223.506
1	307	194.743		1	307	174.824		1	307	222.538		1	307	250.654
1	308	190.216		1	308	195.144		1	308	218.112		1	308	246.025
1	309	160.951		1	309	189.788		1	309	224.749		1	309	251.475
1	310	175.239		1	310	192.232		1	310	224.718		1	310	261.681
1	311	183.885		1	311	201.004		1	311	214.879		1	311	244.886
1	312	194.949		1	312	199.745		1	312	235.562		1	312	250.599
1	313	173.929		1	313	202.092		1	313	236.706		1	313	250.776
1	314	179.621		1	314	189.055		1	314	227.795		1	314	237.57
1	315	183.099		1	315	191.916		1	315	230.162		1	315	242.475
1	316	187.814		1	316	202.661		1	316	229.056		1	316	242.557
1	317	169.899		1	317	189.803		1	317	228.337		1	317	240.902
1	318	179.182		1	318	183.865		1	318	229.323		1	318	264.381
1	319	181.896		1	319	183.357		1	319	228.274		1	319	243.601
1	320	187.893		1	320	190.011		1	320	209.516		1	320	248.225
1	321	185.48		1	321	188.335		1	321	224.949		1	321	237.571
1	322	197.266		1	322	192.603		1	322	226.973		1	322	238.31
1	323	178.652		1	323	184.417		1	323	235.93		1	323	244.013
1	324	188.583		1	324	192.994		1	324	222.181		1	324	239.943
1	325	187.343		1	325	182.961		1	325	225.79		1	325	229.6
1	326	173.124		1	326	185.825		1	326	223.152		1	326	247.472
1	327	180.729		1	327	194.264		1	327	206.766		1	327	244.018
1	328	187.178		1	328	189.342		1	328	222.597		1	328	239.286
1	329	178.022		1	329	201.458		1	329	217.283		1	329	251.503
1	330	178.451		1	330	186.445		1	330	219.894		1	330	256.763
1	331	188.065		1	331	185.828		1	331	226.448		1	331	252.088
1	332	191.833		1	332	186.693		1	332	227.991		1	332	249.36
1	333	170.97		1	333	186.99		1	333	216.597		1	333	261.751
1	334	177.045		1	334	185.827		1	334	224.072		1	334	246.689
1	335	163.611		1	335	186.931		1	335	236.655		1	335	238.043
1	336	178.779		1	336	196.074		2	0	222.359		1	336	234.023
1	337	178.185		1	337	181.799		2	1	221.062		1	337	240.702
1	338	184.448		1	338	189.589		2	2	221.342		1	338	242.906
1	339	191.318		2	0	206.783		2	3	218.286		2	0	221.125
1	340	165.565		2	1	199.376		2	4	220.106		2	1	231.213
1	341	191.713		2	2	186.774		2	5	223.863		2	2	242.898
1	342	189.073		2	3	195.113		2	6	245.17		2	3	220.071
1	343	182.063		2	4	193.832		2	7	221.704		2	4	226.455
1	344	172.126		2	5	195.93		2	8	217.381		2	5	226.929
1	345	175.88		2	6	206.721		2	9	245.295		2	6	234.098
1	346	188.288		2	7	203.765		2	10	220.864		2	7	233.238
1	347	181.503		2	8	192.649		2	11	216.686		2	8	232.438
1	348	177.461		2	9	196.33		2	12	228.398		2	9	241.336
1	349	171.869		2	10	194.734		2	13	220.083		2	10	227.589
1	350	169.421		2	11	204.674		2	14	231.664		2	11	230.723
1	351	167.02		2	12	192.561		2	15	216.369		2	12	236.922
1	352	170.309		2	13	205.662		2	16	225.306		2	13	223.643
1	353	175.408		2	14	193.37		2	17	226.803		2	14	234.435
1	354	169.667		2	15	209.905		2	18	224.688		2	15	229.659
1	355	178.245		2	16	203.644		2	19	241.455		2	16	234.399
1	356	181.41		2	17	189.39		2	20	227.031		2	17	234.976
1	357	188.07		2	18	194.658		2	21	226.196		2	18	211.2
1	358	184.228		2	19	201.747		2	22	215.885		2	19	228.623
2	0	180.313		2	20	196.295		2	23	214.96		2	20	228.447
2	1	175.415		2	21	200.292		2	24	229.716		2	21	225.772
2	2	179.181		2	22	197.299		2	25	233.055		2	22	219.293
2	3	184.988		2	23	208.303		2	26	223.466		2	23	235.104
2	4	177.075		2	24	200.043		2	27	231.738		2	24	240.127
2	5	171.933		2	25	199.94		2	28	227.303		2	25	225.407
2	6	182.022		2	26	206.132		2	29	230.856		2	26	226.375
2	7	172.208		2	27	202.805		2	30	216.398		2	27	232.152
2	8	180.852		2	28	190.051		2	31	225.459		2	28	231.088
2	9	184.212		2	29	198.914		2	32	227.62		2	29	228.899
2	10	188.572		2	30	194.603		2	33	222.747		2	30	220.778
2	11	167.571		2	31	192.089		2	34	226.251		2	31	227.444
2	12	171.356		2	32	196.8		2	35	235.61		2	32	223.248
2	13	175.441		2	33	198.159		2	36	236.544		2	33	228.359
2	14	179.189		2	34	206.359		2	37	228.373		2	34	223.135
2	15	170.008		2	35	200.529		2	38	234.677		2	35	218.205
2	16	179.059		2	36	189.392		2	39	220.908		2	36	221.328
2	17	185.678		2	37	191.99		2	40	225.753		2	37	231.674
2	18	182.328		2	38	195.23		2	41	220.844		2	38	227.736
2	19	186.329		2	39	198.054		2	42	228.037		2	39	232.246
2	20	183.427		2	40	194.015		2	43	227.013		2	40	231.396
2	21	184.51		2	41	199.296		2	44	216.102		2	41	225.655
2	22	173.571		2	42	208.584		2	45	218.771		2	42	210.293
2	23	183.544		2	43	201.006		2	46	227.068		2	43	235.314
2	24	171.37		2	44	206.018		2	47	230.379		2	44	228.993
2	25	172.964		2	45	194.152		2	48	225.65		2	45	222.003
2	26	187.904		2	46	196.021		2	49	227.34		2	46	222.86
2	27	172.479		2	47	198.162		2	50	210.517		2	47	221.036
2	28	178.476		2	48	196.207		2	51	221.994		2	48	229.158
2	29	185.919		2	49	190.864		2	52	234.535		2	49	241.545
2	30	185.952		2	50	198.509		2	53	220.628		2	50	220.948
2	31	185.711		2	51	194.456		2	54	224.509		2	51	223.118
2	32	177.007		2	52	192.082		2	55	220.017		2	52	234.498
2	33	174.907		2	53	196.062		2	56	223.392		2	53	231.452
2	34	173.692		2	54	197.961		2	57	222.965		2	54	226.359
2	35	180.433		2	55	199.872		2	58	222.311		2	55	242.468
2	36	172.017		2	56	196.159		2	59	216.255		2	56	221.532
2	37	175.246		2	57	198.5		2	60	228.495		2	57	231.755
2	38	183.002		2	58	193.956		2	61	217.017		2	58	236.804
2	39	187.985		2	59	209.755		2	62	220.016		2	59	233.401
2	40	187.377		2	60	201.768		2	63	239.041		2	60	220.647
2	41	181.121		2	61	204.906		2	64	228.653		2	61	216.169
2	42	182.916		2	62	191.586		2	65	229.308		2	62	232.572
2	43	191.272		2	63	192.501		2	66	223.388		2	63	237.31
2	44	175.717		2	64	185.065		2	67	210.363		2	64	222.876
2	45	182.641		2	65	197.265		2	68	220.42		2	65	236.157
2	46	176.739		2	66	202.615		2	69	225.131		2	66	225.971
2	47	173.113		2	67	186.562		2	70	232.463		2	67	234.337
2	48	178.37		2	68	200.27		2	71	226.85		2	68	235.884
2	49	181.504		2	69	202.145		2	72	227.918		2	69	240.041
2	50	172.551		2	70	198.013		2	73	223.061		2	70	248.087
2	51	175.93		2	71	197.607		2	74	217.484		2	71	225.869
2	52	185.159		2	72	201.348		2	75	235.753		2	72	226.038
2	53	164.889		2	73	189.402		2	76	230.016		2	73	233.299
2	54	176.837		2	74	195.136		2	77	233.218		2	74	241.063
2	55	168.689		2	75	189.107		2	78	218.453		2	75	236.151
2	56	181.817		2	76	192.908		2	79	208.091		2	76	237.625
2	57	174.735		2	77	200.556		2	80	228.072		2	77	223.031
2	58	178.459		2	78	204.27		2	81	232.091		2	78	221.143
2	59	164.472		2	79	210.629		2	82	220.92		2	79	228.209
2	60	162.745		2	80	198.253		2	83	222.054		2	80	233.807
2	61	173.067		2	81	193.161		2	84	231.175		2	81	234.726
2	62	175.847		2	82	193.332		2	85	228.209		2	82	224.337
2	63	183.9		2	83	201.657		2	86	225.876		2	83	225.605
2	64	175.324		2	84	197.603		2	87	226.098		2	84	231.963
2	65	179.248		2	85	193.737		2	88	214.696		2	85	214.342
2	66	179.616		2	86	211.047		2	89	236.381		2	86	221.516
2	67	177.128		2	87	196.435		2	90	215.349		2	87	226.651
2	68	171.21		2	88	203.906		2	91	218.746		2	88	226.091
2	69	178.509		2	89	198.944		2	92	230.752		2	89	222.376
2	70	181.009		2	90	202.058		2	93	222.959		2	90	217.709
2	71	177.901		2	91	198.343		2	94	227.308		2	91	213.167
2	72	175.021		2	92	191.34		2	95	216.626		2	92	218.911
2	73	173.647		2	93	196.007		2	96	211.972		2	93	234.111
2	74	176.367		2	94	203.216		2	97	228.972		2	94	224.53
2	75	177.026		2	95	189.839		2	98	240.128		2	95	232.719
2	76	175.492		2	96	198.2		2	99	234.236		2	96	223.618
2	77	185.596		2	97	194.349		2	100	246.489		2	97	221.756
2	78	177.834		2	98	186.732		2	101	218.182		2	98	232.23
2	79	184.721		2	99	193.777		2	102	234.827		2	99	226.343
2	80	172.761		2	100	191.694		2	103	239.193		2	100	229.53
2	81	173.519		2	101	187.033		2	104	223.374		2	101	231.59
2	82	181.578		2	102	196.186		2	105	220.052		2	102	233.554
2	83	175.811		2	103	187.735		2	106	221.291		2	103	218.205
2	84	183.048		2	104	194.533		2	107	239.576		2	104	214.624
2	85	176.573		2	105	199.918		2	108	243.778		2	105	217.593
2	86	189.47		2	106	187.242		2	109	224.48		2	106	244.988
2	87	170.442		2	107	204.512		2	110	232.324		2	107	234.743
2	88	175.447		2	108	190.824		2	111	233.601		2	108	232.353
2	89	177.704		2	109	195.915		2	112	221.233		2	109	229.693
2	90	177.123		2	110	192.994		2	113	235.633		2	110	229.081
2	91	177.834		2	111	203.818		2	114	222.767		2	111	228.727
2	92	173.959		2	112	196.575		2	115	229.185		2	112	219.872
2	93	177.098		2	113	196.303		2	116	238.808		2	113	215.691
2	94	183.939		2	114	189.388		2	117	222.086		2	114	220.539
2	95	175.058		2	115	193.388		2	118	218.474		2	115	226.14
2	96	174.934		2	116	192.327		2	119	237.086		2	116	219.618
2	97	177.581		2	117	186.661		2	120	226.62		2	117	227.784
2	98	190.506		2	118	194.496		2	121	230.335		2	118	238.162
2	99	172.803		2	119	190.139		2	122	234.099		2	119	222.428
2	100	150.011		2	120	200.744		2	123	228.641		2	120	227.111
2	101	178.391		2	121	189.11		2	124	228.659		2	121	245.963
2	102	181.141		2	122	188.778		2	125	231.358		2	122	225.539
2	103	178.911		2	123	191.378		2	126	222.871		2	123	229.04
2	104	170.378		2	124	198.994		2	127	231.356		2	124	242.171
2	105	176.902		2	125	193.22		2	128	223.659		2	125	224.52
2	106	180.644		2	126	201.279		2	129	221.774		2	126	214.31
2	107	174.845		2	127	198.232		2	130	222.146		2	127	213.308
2	108	188.565		2	128	196.176		2	131	222.2		2	128	237.268
2	109	174.529		2	129	202.205		2	132	220.572		2	129	224.733
2	110	182.072		2	130	197.39		2	133	227.627		2	130	225.46
2	111	176.646		2	131	199.548		2	134	215.822		2	131	233.228
2	112	177.078		2	132	196.478		2	135	240.749		2	132	236.241
2	113	184.446		2	133	193.967		2	136	227.759		2	133	240.88
2	114	178.615		2	134	194.196		2	137	234.445		2	134	233.383
2	115	176.575		2	135	191.407		2	138	221.217		2	135	229.899
2	116	184.732		2	136	178.596		2	139	224.319		2	136	239.594
2	117	177.536		2	137	195.663		2	140	227.647		2	137	232.063
2	118	181.155		2	138	206.445		2	141	231.561		2	138	238.095
2	119	172.806		2	139	195.43		2	142	219.551		2	139	216.833
2	120	182.665		2	140	200.558		2	143	226.099		2	140	226.855
2	121	184.318		2	141	194.214		2	144	225.161		2	141	226.029
2	122	171.384		2	142	190.919		2	145	240.646		2	142	228.215
2	123	170.3		2	143	194.682		2	146	235.01		2	143	223.085
2	124	175.465		2	144	193.499		2	147	208.388		2	144	229.395
2	125	184.074		2	145	195.871		2	148	216.349		2	145	228.206
2	126	174.635		2	146	203.378		2	149	221.209		2	146	223.204
2	127	170.039		2	147	204.174		2	150	219.474		2	147	228.644
2	128	165.691		2	148	202.44		2	151	231.543		2	148	226.463
2	129	185.309		2	149	205.837		2	152	216.343		2	149	235.423
2	130	172.936		2	150	200.664		2	153	220.899		2	150	232.158
2	131	178.644		2	151	197.613		2	154	218.843		2	151	224.219
2	132	183.314		2	152	191.203		2	155	212.886		2	152	242.256
2	133	177.127		2	153	196.542		2	156	224.309		2	153	235.114
2	134	177.096		2	154	204.35		2	157	223.453		2	154	224.396
2	135	184.33		2	155	193.669		2	158	226.614		2	155	231.76
2	136	184.566		2	156	188.245		2	159	221.78		2	156	234.015
2	137	173.38		2	157	189.852		2	160	218.899		2	157	224.964
2	138	171.509		2	158	202.942		2	161	221.283		2	158	229.867
2	139	170.741		2	159	187.552		2	162	237.332		2	159	229.289
2	140	183.993		2	160	201.588		2	163	218.673		2	160	222.776
2	141	181.3		2	161	194.711		2	164	242.991		2	161	233.652
2	142	174.211		2	162	215.739		2	165	232.69		2	162	224.736
2	143	184.644		2	163	203.861		2	166	225.583		2	163	224.101
2	144	178.163		2	164	204.854		2	167	234.342		2	164	234.991
2	145	178.672		2	165	209.063		2	168	231.908		2	165	230.653
2	146	187.412		2	166	203.756		2	169	217.679		2	166	234.153
2	147	178.503		2	167	196.661		2	170	223.945		2	167	223.022
2	148	172.992		2	168	193.39		2	171	232.165		2	168	228.443
2	149	171.812		2	169	208.162		2	172	224.35		2	169	216.402
2	150	183.973		2	170	194.727		2	173	231.174		2	170	226.155
2	151	166.499		2	171	195.945		2	174	219.692		2	171	236.154
2	152	180.489		2	172	196.097		2	175	221.836		2	172	227.914
2	153	165.926		2	173	204.351		2	176	214.621		2	173	209.664
2	154	178.722		2	174	184.886		2	177	233.76		2	174	228.874
2	155	180.927		2	175	199.863		2	178	206.079		2	175	224.974
2	156	181.895		2	176	193.864		2	179	197.038		2	176	224.118
2	157	178.73		2	177	193.165		2	180	222.266		2	177	228.302
2	158	193.563		2	178	201.684		2	181	225.743		2	178	227.092
2	159	174.496		2	179	201.411		2	182	214.459		2	179	234.161
2	160	176.002		2	180	199.916		2	183	229.653		2	180	215.992
2	161	172.202		2	181	199.486		2	184	235.756		2	181	222.394
2	162	177.017		2	182	187.623		2	185	227.3		2	182	230.826
2	163	174.785		2	183	198.744		2	186	212.005		2	183	228.753
2	164	185.755		2	184	203.58		2	187	220.623		2	184	224.155
2	165	174.336		2	185	188.926		2	188	221.668		2	185	236.299
2	166	172.475		2	186	192.099		2	189	227.813		2	186	223.674
2	167	177.336		2	187	193.385		2	190	240.665		2	187	222.732
2	168	177.982		2	188	206.686		2	191	229.587		2	188	220.802
2	169	184.886		2	189	187.822		2	192	227.302		2	189	232.379
2	170	169.023		2	190	191.663		2	193	226.43		2	190	228.438
2	171	177.3		2	191	195.318		2	194	203.486		2	191	235.889
2	172	180.739		2	192	191.247		2	195	203.318		2	192	233.36
2	173	179.783		2	193	195.907		2	196	216.164		2	193	236.137
2	174	189.591		2	194	196.634		2	197	234.26		2	194	231.818
2	175	177.619		2	195	207.745		2	198	226.847		2	195	237.328
2	176	178.71		2	196	202.056		2	199	232.32		2	196	216.937
2	177	175.455		2	197	206.172		2	200	222.012		2	197	231.398
2	178	187.319		2	198	205.21		2	201	221.022		2	198	236.083
2	179	175.529		2	199	208.089		2	202	233.532		2	199	238.953
2	180	179.599		2	200	188.279		2	203	230.479		2	200	234.038
2	181	167.697		2	201	198.71		2	204	234.758		2	201	234.326
2	182	175.895		2	202	196.586		2	205	222.678		2	202	241.039
2	183	188.586		2	203	191.265		2	206	214.527		2	203	242.821
2	184	167.053		2	204	193.559		2	207	221.359		2	204	226.009
2	185	173.858		2	205	196.805		2	208	225.529		2	205	236.456
2	186	179.807		2	206	195.609		2	209	217.664		2	206	236.235
2	187	179.458		2	207	197.362		2	210	220.843		2	207	226.543
2	188	181.613		2	208	195.205		2	211	227.703		2	208	231.167
2	189	180.41		2	209	194.158		2	212	232.908		2	209	223.67
2	190	178.619		2	210	206.971		2	213	223.077		2	210	220.898
2	191	176.753		2	211	197.111		2	214	222.164		2	211	237.44
2	192	185.315		2	212	184.469		2	215	224.768		2	212	222.871
2	193	188.027		2	213	198.997		2	216	223.846		2	213	229.591
2	194	176.207		2	214	196.678		2	217	220.756		2	214	224.501
2	195	178.823		2	215	204.453		2	218	231.952		2	215	225.385
2	196	181.867		2	216	204.928		2	219	223.929		2	216	217.759
2	197	186.908		2	217	195.715		2	220	220.262		2	217	219.026
2	198	176.665		2	218	204.413		2	221	223.036		2	218	228.078
2	199	181.862		2	219	186.517		2	222	224.928		2	219	222.661
2	200	178.752		2	220	200.923		2	223	226.92		2	220	234.494
2	201	182.774		2	221	200.686		2	224	219.074		2	221	234.982
2	202	177.615		2	222	200.878		2	225	212.517		2	222	242.789
2	203	169.655		2	223	195.464		2	226	223.662		2	223	175.792
2	204	174.171		2	224	201.476		2	227	219.234		2	224	211.801
2	205	168.241		2	225	195.464		2	228	227.42		2	225	229.111
2	206	178.384		2	226	205.397		2	229	243.052		2	226	232.611
2	207	173.835		2	227	209.628		2	230	210.952		2	227	237.319
2	208	187.901		2	228	195.14		2	231	216.19		2	228	215.836
2	209	166.627		2	229	199.017		2	232	222.503		2	229	214.969
2	210	180.857		2	230	197.202		2	233	221.03		2	230	231.652
2	211	175.52		2	231	208.425		2	234	230.556		2	231	238.867
2	212	180.461		2	232	196.384		2	235	222.418		2	232	229.411
2	213	166.19		2	233	200.382		2	236	216.353		2	233	222.498
2	214	169.671		2	234	205.4		2	237	222.286		2	234	231.147
2	215	164.559		2	235	196.308		2	238	220.845		2	235	229.356
2	216	177.906		2	236	196.21		2	239	217.508		2	236	230.762
2	217	173.741		2	237	191.449		2	240	227.105		2	237	231.916
2	218	177.94		2	238	205.48		2	241	224.12		2	238	225.985
2	219	182.283		2	239	197.026		2	242	226.251		2	239	237.472
2	220	181.783		2	240	199.311		2	243	237.145		2	240	239.798
2	221	177.567		2	241	200.514		2	244	235.156		2	241	235.211
2	222	170.724		2	242	195.65		2	245	226.981		2	242	223.973
2	223	182.541		2	243	191.915		2	246	225.625		2	243	226.251
2	224	178.8		2	244	181.548		2	247	226.538		2	244	214.087
2	225	177.366		2	245	185.072		2	248	235.015		2	245	230.99
2	226	175.366		2	246	199.06		2	249	227.991		2	246	230.345
2	227	179.53		2	247	206.883		2	250	222.702		2	247	232.197
2	228	175.407		2	248	200.089		2	251	231.86		2	248	231.421
2	229	186.268		2	249	197.362		2	252	222.784		2	249	233.18
2	230	190.896		2	250	192.987		2	253	216.024		2	250	230.387
2	231	189.39		2	251	194.287		2	254	223.506		2	251	225.277
2	232	176		2	252	205.69		2	255	216.561		2	252	215.76
2	233	179.019		2	253	198.404		2	256	241.31		2	253	233.495
2	234	177.37		2	254	190.055		2	257	236.471		2	254	234.71
2	235	176.711		2	255	199.615		2	258	223.032		2	255	243.047
2	236	187.482		2	256	199.664		2	259	222.595		2	256	219.312
2	237	179.204		2	257	202.274		2	260	241.688		2	257	222.711
2	238	176.798		2	258	198.696		2	261	223.917		2	258	232.345
2	239	185.174		2	259	191.611		2	262	197.591		2	259	246.966
2	240	193.982		2	260	200.19		2	263	225.019		2	260	233.676
2	241	170.434		2	261	192.546		2	264	236.87		2	261	226.919
2	242	168.374		2	262	193.205		2	265	241.163		2	262	221.772
2	243	183.599		2	263	195.961		2	266	230.464		2	263	228.632
2	244	188.353		2	264	198.388		2	267	212.464		2	264	230.875
2	245	183.116		2	265	200.695		2	268	217.227		2	265	235.912
2	246	196.001		2	266	198.91		2	269	234.081		2	266	242.216
2	247	185.85		2	267	185.837		2	270	231.464		2	267	236.082
2	248	174.896		2	268	192.177		2	271	227.469		2	268	225.128
2	249	181.893		2	269	175.947		2	272	223.233		2	269	216.983
2	250	177.092		2	270	191.367		2	273	212.137		2	270	229.854
2	251	182.362		2	271	189.49		2	274	235.553		2	271	234.654
2	252	178.503		2	272	209.084		2	275	224.075		2	272	227.707
2	253	166.274		2	273	194.538		2	276	224.974		2	273	227.508
2	254	177.818		2	274	199.099		2	277	225.743		2	274	236.466
2	255	188.223		2	275	192.129		2	278	242.456		2	275	229.284
2	256	184.451		2	276	194.2		2	279	227.818		2	276	222.48
2	257	184.186		2	277	202.62		2	280	226.89		2	277	224.711
2	258	183.27		2	278	197.001		2	281	233.389		2	278	233.348
2	259	178.631		2	279	192.43		2	282	224.882		2	279	233.547
2	260	188.799		2	280	198.527		2	283	218.673		2	280	228.129
2	261	190.862		2	281	205.469		2	284	222.943		2	281	229.334
2	262	179.357		2	282	207.542		2	285	226.712		2	282	226.79
2	263	180.013		2	283	193.601		2	286	216.857		2	283	226.731
2	264	168.198		2	284	200.172		2	287	231.934		2	284	222.261
2	265	176.981		2	285	187.523		2	288	228.663		2	285	231.911
2	266	180.925		2	286	183.894		2	289	222.212		2	286	231.999
2	267	177.812		2	287	197.576		2	290	232.512		2	287	228.197
2	268	179.387		2	288	201.648		2	291	216.466		2	288	227.115
2	269	187.635		2	289	197.281		2	292	223.929		2	289	231.77
2	270	179.555		2	290	196.481		2	293	221.064		2	290	229.434
2	271	178.458		2	291	197.713		2	294	223.279		2	291	232.736
2	272	176.475		2	292	195.106		2	295	229.468		2	292	229.711
2	273	178.134		2	293	190.578		2	296	215.148		2	293	228.52
2	274	185.751		2	294	201.627		2	297	227.242		2	294	240.171
2	275	180.147		2	295	192.508		2	298	221.946		2	295	229.892
2	276	184.936		2	296	196.121		2	299	236.695		2	296	222.781
2	277	182.657		2	297	186.683		2	300	208.638		2	297	235.399
2	278	183.234		2	298	194.442		2	301	228.978		2	298	231.178
2	279	186.956		2	299	201.762		2	302	231.05		2	299	230.983
2	280	178.574		2	300	200.524		2	303	228.262		2	300	230.144
2	281	178.974		2	301	195.163		2	304	243.771		2	301	231.936
2	282	176.818		2	302	193.358		2	305	232.889		2	302	231.729
2	283	183.11		2	303	199.551		2	306	236.068		2	303	231.73
2	284	186.717		2	304	198.016		2	307	230.999		2	304	238.105
2	285	171.815		2	305	198.504		2	308	229.44		2	305	227.953
2	286	189.066		2	306	193.471		2	309	224.084		2	306	229.991
2	287	182.579		2	307	195.942		2	310	233.146		2	307	224.29
2	288	184.145		2	308	196.951		2	311	224.353		2	308	222.161
2	289	181.274		2	309	200.139		2	312	218.404		2	309	221.104
2	290	187.307		2	310	198.438		2	313	232.438		2	310	229.06
2	291	179.537		2	311	193.8		2	314	232.336		2	311	227.054
2	292	181.342		2	312	196.068		2	315	225.211		2	312	222.547
2	293	181.745		2	313	196.492		2	316	228.799		2	313	236.939
2	294	180.34		2	314	202.567		2	317	240.126		2	314	227.276
2	295	187.113		2	315	191.754		2	318	221.05		2	315	230.558
2	296	187.894		2	316	192.686		2	319	211.284		2	316	227.741
2	297	181.707		2	317	191.852		2	320	223.177		2	317	226.052
2	298	185.378		2	318	190.754		2	321	227.606		2	318	240.771
2	299	181.976		2	319	198.379		2	322	227.202		2	319	236.37
2	300	172.832		2	320	197.627		2	323	239.328		2	320	220.26
2	301	173.779		2	321	197.72		2	324	231.277		2	321	226.587
2	302	178.942		2	322	203.181		2	325	185.25		2	322	226.87
2	303	176.641		2	323	185.747		2	326	223.779		2	323	238.726
2	304	175.054		2	324	202.008		2	327	241.05		2	324	229.193
2	305	174.548		2	325	188.025		2	328	218.359		2	325	237.129
2	306	171.87		2	326	192.785		2	329	230.354		2	326	236.484
2	307	166.509		2	327	196.548		2	330	223.803		2	327	236.591
2	308	172.462		2	328	188		2	331	237.475		2	328	230.559
2	309	175.794		2	329	201.663		2	332	243.716		2	329	242.478
2	310	182.919		2	330	198.137		2	333	214.561		2	330	231.935
2	311	174.843		2	331	194.322		2	334	216.798		2	331	229.543
2	312	169.575		2	332	200.86		2	335	252.919		2	332	233.205
2	313	177.877		2	333	196.088		2	336	230.81		2	333	234.042
2	314	174.754		2	334	203.605		2	337	229.335		2	334	238.209
2	315	180.275		2	335	194.059		2	338	207.809		2	335	236.966
2	316	173.572		2	336	199.28		2	339	233.046		3	0	247.33
2	317	178.53		2	337	195.063		2	340	228.905		3	1	244.046
2	318	183.286		2	338	194.909		3	0	238.05		3	2	256.744
2	319	179.719		3	0	182.071		3	1	213.385		3	3	247.283
2	320	179.58		3	1	180.482		3	2	207.466		3	4	250.578
2	321	182.809		3	2	186.65		3	3	223.232		3	5	248.071
2	322	180.792		3	3	191.1		3	4	223.666		3	6	243.888
2	323	193.352		3	4	185.563		3	5	205.26		3	7	250.743
2	324	185.876		3	5	199.33		3	6	214.268		3	8	225.344
2	325	179.236		3	6	195.923		3	7	208.062		3	9	249.499
2	326	182.428		3	7	186.74		3	8	219.675		3	10	234.126
2	327	183.545		3	8	174.144		3	9	214.676		3	11	229.132
2	328	180.083		3	9	191.72		3	10	223.262		3	12	246.217
2	329	175.192		3	10	195.738		3	11	223.529		3	13	247.011
2	330	185.041		3	11	184.285		3	12	228.279		3	14	245.299
2	331	193.698		3	12	195.188		3	13	242.342		3	15	241.734
2	332	189.922		3	13	195.102		3	14	229.719		3	16	238.37
2	333	182.925		3	14	202.83		3	15	211.923		3	17	236.274
2	334	176.857		3	15	190.293		3	16	214.041		3	18	239.816
2	335	186.212		3	16	196.343		3	17	223.817		3	19	235.056
2	336	185.145		3	17	182.962		3	18	227.669		3	20	235.67
2	337	191.776		3	18	189.724		3	19	219.044		3	21	250.126
2	338	181.02		3	19	182.192		3	20	224.698		3	22	239.939
2	339	164.103		3	20	186.602		3	21	218.568		3	23	245.498
2	340	170.804		3	21	205.989		3	22	211.905		3	24	249.494
3	0	159.994		3	22	197.179		3	23	170.308		3	25	240.473
3	1	168.098		3	23	193.567		3	24	214.958		3	26	221.549
3	2	156.251		3	24	188.279		3	25	226.983		3	27	229.111
3	3	169.196		3	25	194.103		3	26	234.515		3	28	234.925
3	4	172.548		3	26	195.209		3	27	218.897		3	29	249.942
3	5	162.062		3	27	193.813		3	28	225.235		3	30	243.25
3	6	163.941		3	28	196.663		3	29	215.611		3	31	232.241
3	7	166.196		3	29	189.455		3	30	235.278		3	32	238.882
3	8	165.401		3	30	195.121		3	31	222.358		3	33	253.566
3	9	167.391		3	31	196.849		3	32	218.889		3	34	249.803
3	10	167.772		3	32	177.958		3	33	219.351		3	35	236.327
3	11	168.629		3	33	189.266		3	34	217.392		3	36	240.516
3	12	162.969		3	34	196.476		3	35	218.967		3	37	247.818
3	13	162.042		3	35	196.662		3	36	212.843		3	38	243.679
3	14	161.96		3	36	191.639		3	37	227.314		3	39	248.106
3	15	162.026		3	37	186.662		3	38	227.961		3	40	249.11
3	16	160.211		3	38	193.066		3	39	213.849		3	41	247.436
3	17	168.659		3	39	194.942		3	40	232.185		3	42	242.133
3	18	165.964		3	40	185.755		3	41	239.133		3	43	238.079
3	19	162.789		3	41	194.266		3	42	227.051		3	44	230.946
3	20	161.699		3	42	186.533		3	43	221.023		3	45	241.465
3	21	168.593		3	43	196.78		3	44	215.758		3	46	237.958
3	22	159.719		3	44	199.905		3	45	221.439		3	47	241.522
3	23	170.042		3	45	206.176		3	46	246.611		3	48	234.846
3	24	163.942		3	46	191.449		3	47	223.068		3	49	239.564
3	25	156.435		3	47	190.873		3	48	228.937		3	50	243.248
3	26	166.334		3	48	177.761		3	49	212.536		3	51	236.523
3	27	155.081		3	49	195.829		3	50	223.375		3	52	225.878
3	28	171.031		3	50	184.256		3	51	234.776		3	53	231.954
3	29	162.338		3	51	195.752		3	52	222.163		3	54	249.9
3	30	160.717		3	52	177.875		3	53	224.359		3	55	248.758
3	31	165.139		3	53	185.959		3	54	227.362		3	56	258.011
3	32	157.989		3	54	190.668		3	55	226.016		3	57	230.645
3	33	156.517		3	55	187.253		3	56	230.009		3	58	238.25
3	34	155.931		3	56	195.312		3	57	230.782		3	59	242.488
3	35	161.723		3	57	183.406		3	58	226.954		3	60	240.598
3	36	160.229		3	58	189.681		3	59	228.943		3	61	253.087
3	37	168.569		3	59	191.047		3	60	213.715		3	62	229.27
3	38	165.988		3	60	197.566		3	61	219.31		3	63	242.288
3	39	159.547		3	61	193.071		3	62	214.004		3	64	243.224
3	40	172.437		3	62	189.024		3	63	221.047		3	65	243.73
3	41	160.091		3	63	188.287		3	64	215.89		3	66	239.213
3	42	154.541		3	64	195.145		3	65	222.995		3	67	260.154
3	43	166.843		3	65	203.204		3	66	234.828		3	68	251.877
3	44	169.824		3	66	196.256		3	67	228.016		3	69	241.232
3	45	153.67		3	67	188.537		3	68	246.438		3	70	229.896
3	46	169.441		3	68	181.462		3	69	223.143		3	71	248.084
3	47	157.907		3	69	178.889		3	70	213.813		3	72	238.994
3	48	172.23		3	70	182.905		3	71	209.506		3	73	245.382
3	49	153.911		3	71	196.076		3	72	236.156		3	74	230.581
3	50	162.178		3	72	203.035		3	73	215.493		3	75	229.617
3	51	166.748		3	73	187.993		3	74	229.599		3	76	234.591
3	52	174.701		3	74	178.457		3	75	246.625		3	77	246.895
3	53	161.689		3	75	186.442		3	76	236.156		3	78	234.275
3	54	159.565		3	76	183.827		3	77	239.093		3	79	236.028
3	55	165.988		3	77	181.893		3	78	229.653		3	80	244.397
3	56	169.456		3	78	185.312		3	79	217.023		3	81	248.087
3	57	157.979		3	79	190.62		3	80	236.163		3	82	232.122
3	58	161.792		3	80	183.546		3	81	218.232		3	83	248.559
3	59	167.41		3	81	186.019		3	82	219.265		3	84	243.496
3	60	167.489		3	82	192.011		3	83	222.307		3	85	241.825
3	61	170.684		3	83	198.639		3	84	233.036		3	86	241.822
3	62	162.799		3	84	191.15		3	85	235.019		3	87	257.723
3	63	158.622		3	85	197.275		3	86	217.186		3	88	250.749
3	64	162.779		3	86	190.826		3	87	217.393		3	89	257.818
3	65	167.282		3	87	184.085		3	88	221.873		3	90	246.631
3	66	169.63		3	88	186.333		3	89	229.213		3	91	239.313
3	67	164.172		3	89	188.582		3	90	225.93		3	92	247.1
3	68	166.896		3	90	190.373		3	91	225.854		3	93	245.969
3	69	162.889		3	91	189.685		3	92	227.046		3	94	241.643
3	70	166.367		3	92	192.573		3	93	212.951		3	95	255.698
3	71	159.807		3	93	186.875		3	94	225.938		3	96	233.009
3	72	161.948		3	94	191.201		3	95	216.778		3	97	240.136
3	73	167.149		3	95	191.892		3	96	222.503		3	98	239.474
3	74	162.228		3	96	183.78		3	97	221.278		3	99	254.296
3	75	157.566		3	97	180.163		3	98	234.96		3	100	236.551
3	76	167.143		3	98	192.877		3	99	220.329		3	101	239.16
3	77	168.336		3	99	188.714		3	100	195.94		3	102	252.609
3	78	171.279		3	100	181.163		3	101	216.787		3	103	240.93
3	79	175.849		3	101	189.164		3	102	227.988		3	104	248.656
3	80	173.481		3	102	202.647		3	103	213.706		3	105	251.676
3	81	163.613		3	103	197.785		3	104	220.511		3	106	234.244
3	82	167.871		3	104	190.836		3	105	215.672		3	107	239.774
3	83	160.658		3	105	190.511		3	106	235.012		3	108	239.597
3	84	164.765		3	106	195.348		3	107	225.141		3	109	243.848
3	85	169.531		3	107	182.31		3	108	217.452		3	110	253.713
3	86	160.642		3	108	200.348		3	109	207.59		3	111	238.155
3	87	170.415		3	109	195.651		3	110	212.108		3	112	253.393
3	88	158.916		3	110	193.112		3	111	223.453		3	113	240.885
3	89	168.473		3	111	189.058		3	112	230.53		3	114	237.543
3	90	166.035		3	112	196.112		3	113	222.449		3	115	253.707
3	91	161.762		3	113	193.478		3	114	217.305		3	116	242.166
3	92	166.811		3	114	200.828		3	115	252.492		3	117	245.805
3	93	159.011		3	115	185.678		3	116	245.72		3	118	231.658
3	94	165.143		3	116	184.696		3	117	231.923		3	119	240.591
3	95	159.345		3	117	189.044		3	118	212.852		3	120	256.977
3	96	175.059		3	118	198.742		3	119	226.178		3	121	236.262
3	97	170.481		3	119	190.057		3	120	232.538		3	122	241.588
3	98	159.254		3	120	193.904		3	121	218.469		3	123	237.184
3	99	156.368		3	121	190.128		3	122	229.043		3	124	234.051
3	100	164.67		3	122	193.788		3	123	220.728		3	125	231.479
3	101	173.554		3	123	189.323		3	124	241.299		3	126	258.422
3	102	162.54		3	124	172.683		3	125	229.289		3	127	242.238
3	103	162.555		3	125	183.211		3	126	234.935		3	128	244.982
3	104	161.862		3	126	187.495		3	127	235.288		3	129	254.929
3	105	156.903		3	127	194.136		3	128	225.734		3	130	251.904
3	106	155.187		3	128	192.403		3	129	243.273		3	131	242.135
3	107	168.088		3	129	193.563		3	130	229.525		3	132	244.384
3	108	164.742		3	130	178.03		3	131	229.246		3	133	244.827
3	109	161.666		3	131	186.888		3	132	230.218		3	134	239.132
3	110	161.529		3	132	187.621		3	133	233.734		3	135	240.457
3	111	157.91		3	133	177.94		3	134	234.957		3	136	237.784
3	112	159.326		3	134	198.107		3	135	230.755		3	137	238.369
3	113	156.275		3	135	191.87		3	136	233.805		3	138	248.219
3	114	160.211		3	136	198.38		3	137	238.791		3	139	239.088
3	115	168.816		3	137	195.345		3	138	236.487		3	140	221.159
3	116	165.516		3	138	199.805		3	139	227.681		3	141	236.466
3	117	162.203		3	139	180.55		3	140	215.116		3	142	219.184
3	118	165.986		3	140	193.2		3	141	242.061		3	143	233.587
3	119	166.484		3	141	197.251		3	142	222.851		3	144	239.414
3	120	159.789		3	142	203.464		3	143	213.813		3	145	182.675
3	121	167.396		3	143	194.293		3	144	236.672		3	146	247.135
3	122	162.684		3	144	194.004		3	145	247.681		3	147	254.807
3	123	163.522		3	145	193.831		3	146	228.368		3	148	252.489
3	124	159.933		3	146	190.41		3	147	224.379		3	149	226.389
3	125	161.84		3	147	195.376		3	148	228.293		3	150	235.876
3	126	164.369		3	148	186.651		3	149	228.013		3	151	245.75
3	127	169.586		3	149	189.649		3	150	225.338		3	152	231.179
3	128	154.02		3	150	191.145		3	151	211.104		3	153	216.583
3	129	160.215		3	151	190.596		3	152	222.098		3	154	233.175
3	130	160.515		3	152	183.089		3	153	236.562		3	155	226.386
3	131	154.636		3	153	189.521		3	154	216.123		3	156	238.373
3	132	160.855		3	154	196.184		3	155	214.778		3	157	243.498
3	133	168.473		3	155	189.549		3	156	225.227		3	158	241.987
3	134	165.003		3	156	189.61		3	157	235.034		3	159	245.867
3	135	166.578		3	157	193.793		3	158	236.497		3	160	243.185
3	136	157.831		3	158	189.351		3	159	244.073		3	161	224.063
3	137	158.477		3	159	187.972		3	160	244.985		3	162	249.629
3	138	158.386		3	160	188.208		3	161	213.963		3	163	235.509
3	139	156.695		3	161	186.961		3	162	209.212		3	164	240.378
3	140	162.271		3	162	191.869		3	163	214.896		3	165	236.835
3	141	168.584		3	163	192.836		3	164	205.727		3	166	243.528
3	142	167.355		3	164	192.121		3	165	216.784		3	167	241.809
3	143	162.73		3	165	184.409		3	166	220.139		3	168	237.885
3	144	153.837		3	166	186.545		3	167	234.103		3	169	250.123
3	145	162.127		3	167	206.151		3	168	212.549		3	170	239.711
3	146	163.132		3	168	198.982		3	169	233.163		3	171	237.01
3	147	166.605		3	169	189.267		3	170	224.651		3	172	226.517
3	148	156.693		3	170	188.769		3	171	229.842		3	173	245.715
3	149	153.399		3	171	198.267		3	172	219.672		3	174	232.026
3	150	159.765		3	172	194.295		3	173	218.053		3	175	247.504
3	151	166.287		3	173	183.294		3	174	219.337		3	176	241.539
3	152	163.016		3	174	197.163		3	175	221.614		3	177	235.954
3	153	169.503		3	175	184.582		3	176	221.269		3	178	246.819
3	154	159.971		3	176	193.537		3	177	212.066		3	179	253.559
3	155	171.854		3	177	196.912		3	178	214.583		3	180	238.779
3	156	161.687		3	178	193.054		3	179	218.235		3	181	247.63
3	157	160.931		3	179	203.974		3	180	217.089		3	182	239.798
3	158	164.278		3	180	194.257		3	181	202.688		3	183	245.592
3	159	165.552		3	181	206.558		3	182	226.218		3	184	251.715
3	160	152.66		3	182	187.319		3	183	211.706		3	185	234.494
3	161	154.911		3	183	193.31		3	184	228.499		3	186	238.767
3	162	165.365		3	184	190.531		3	185	232.621		3	187	245.747
3	163	158.97		3	185	186.432		3	186	234.156		3	188	244.894
3	164	161.149		3	186	191.072		3	187	227.011		3	189	243.079
3	165	172.628		3	187	181.722		3	188	227.816		3	190	242.116
3	166	169.534		3	188	185.585		3	189	227.335		3	191	248.125
3	167	160.666		3	189	195.185		3	190	216.905		3	192	242.671
3	168	157.163		3	190	194.63		3	191	220.315		3	193	237.752
3	169	165.529		3	191	201.069		3	192	213.025		3	194	245.184
3	170	157.513		3	192	199.805		3	193	206.279		3	195	236.905
3	171	147.673		3	193	189.406		3	194	210.327		3	196	238.768
3	172	161.994		3	194	179.704		3	195	220.423		3	197	236.169
3	173	164.183		3	195	185.759		3	196	223.46		3	198	252.258
3	174	162.786		3	196	195.226		3	197	229.108		3	199	247.791
3	175	170.233		3	197	175.645		3	198	226.605		3	200	234.719
3	176	167.765		3	198	194.306		3	199	230.731		3	201	244.581
3	177	173.268		3	199	194.248		3	200	215.216		3	202	241.451
3	178	168.737		3	200	181.238		3	201	218.339		3	203	231.588
3	179	168.847		3	201	185.82		3	202	230.895		3	204	233.025
3	180	169.954		3	202	193.454		3	203	223.243		3	205	233.326
3	181	158.27		3	203	183.608		3	204	238.86		3	206	234.492
3	182	163.479		3	204	189.007		3	205	224.211		3	207	246.472
3	183	151.613		3	205	180.677		3	206	229.179		3	208	246.186
3	184	158.77		3	206	184.317		3	207	225.854		3	209	250.472
3	185	168.496		3	207	189.192		3	208	223.25		3	210	239.635
3	186	168.55		3	208	185.277		3	209	222.305		3	211	235.001
3	187	161.901		3	209	176.115		3	210	226.974		3	212	240.988
3	188	164.653		3	210	180.985		3	211	214.38		3	213	242.076
3	189	161.752		3	211	190.385		3	212	227.332		3	214	235.393
3	190	157.298		3	212	188.007		3	213	229.844		3	215	245.861
3	191	157.003		3	213	181.69		3	214	218.757		3	216	232.216
3	192	156.747		3	214	188.679		3	215	223.992		3	217	243.197
3	193	158.401		3	215	196.411		3	216	209.33		3	218	235.465
3	194	161.847		3	216	199.442		3	217	231.445		3	219	258.97
3	195	164.556		3	217	176.47		3	218	229.667		3	220	224.02
3	196	161.882		3	218	188.168		3	219	211.601		3	221	244.436
3	197	158.046		3	219	194.908		3	220	236.433		3	222	246.177
3	198	154.813		3	220	194.43		3	221	218.245		3	223	251.844
3	199	162.265		3	221	190.367		3	222	225.377		3	224	250.097
3	200	163.149		3	222	197.056		3	223	214.824		3	225	248.563
3	201	166.079		3	223	198.218		3	224	222.405		3	226	248.303
3	202	162.055		3	224	180.013		3	225	222.256		3	227	229.981
3	203	159.744		3	225	191.922		3	226	226.797		3	228	236.686
3	204	163.091		3	226	197.487		3	227	236.071		3	229	251.252
3	205	156.105		3	227	185.622		3	228	237.833		3	230	243.699
3	206	157.21		3	228	188.983		3	229	232.134		3	231	254.429
3	207	160.231		3	229	189.736		3	230	236.266		3	232	230.434
3	208	164.511		3	230	186.583		3	231	222.754		3	233	254.365
3	209	164.409		3	231	192.981		3	232	229.659		3	234	243.344
3	210	161.18		3	232	182.92		3	233	231.153		3	235	239.647
3	211	158.341		3	233	188.051		3	234	229.185		3	236	241.606
3	212	160.925		3	234	187.895		3	235	215.282		3	237	240.333
3	213	159.907		3	235	185.535		3	236	225.128		3	238	241.258
3	214	159.783		3	236	189.833		3	237	231.78		3	239	248.706
3	215	154.711		3	237	187.02		3	238	230.739		3	240	228.557
3	216	158.66		3	238	190.824		3	239	217.585		3	241	233.37
3	217	160.607		3	239	178.536		3	240	220.762		3	242	250.153
3	218	163.488		3	240	181.889		3	241	223.062		3	243	260.751
3	219	165.57		3	241	198.937		3	242	221.835		3	244	232.396
3	220	164.136		3	242	194.57		3	243	231.236		3	245	254.605
3	221	167.384		3	243	188.14		3	244	226.004		3	246	240.728
3	222	155.509		3	244	187.111		3	245	214.73		3	247	244.328
3	223	160.189		3	245	198.543		3	246	204.419		3	248	225.915
3	224	158.642		3	246	205.775		3	247	237.279		3	249	237.104
3	225	153.34		3	247	214.772		3	248	240.75		3	250	242.032
3	226	164.385		3	248	185.452		3	249	226.831		3	251	247.109
3	227	164.057		3	249	180.437		3	250	241.418		3	252	248.935
3	228	170.416		3	250	192.302		3	251	241.63		3	253	238.743
3	229	155.708		3	251	197.445		3	252	238.361		3	254	233.849
3	230	172.812		3	252	192.608		3	253	212.311		3	255	236.351
[truncated: 12,416 more rows]
