# Supplementary material for: Stall force measurement of the kinesin-3 motor KIF1A using a programmable DNA origami nanospring
Source: eLife. 2026 Mar 25;14:RP108477. doi: 10.7554/eLife.108477 (PMC13016605; doi:10.7554/eLife.108477)
Supplement: Figure 3—source data 1. [file elife-108477-fig3-data1.xlsx]

## Sheet: a
WT/WT
33 fps
frame	nanospring length before correction (nm)	theta (rad)
1	114.959	0.269742
2	175.224	1.2469
3	189.377	-0.825177
4	67.7552	0.397342
5	125.226	-0.551945
6	197.264	-0.385627
7	138.243	0.629775
8	231.389	0.926309
9	190.694	-0.942421
10	106.262	0.228383
11	224.245	-0.368293
12	235.771	-0.51774
13	109.398	1.28366
14	163.033	-0.392507
15	173.601	0.299857
16	217.062	-1.3752
17	187.962	0.44842
18	127.418	1.10057
19	258.542	0.683969
20	101.746	0.751685
21	206.075	0.790582
22	142.177	-0.372789
23	242.403	0.870706
24	200.666	0.11778
25	256.522	-0.370607
26	154.841	0.655191
27	264.746	-0.101114
28	232.016	0.677398
29	101.382	0.40216
30	213.487	-0.183024
31	126.387	-0.691173
32	191.017	-0.151186
33	182.038	0.66828
34	215.218	-0.314978
35	148.145	1.49193
36	132.166	-0.176236
37	220.466	0.866824
38	216.167	-1.21467
39	231.288	1.0944
40	179.587	1.33012
41	208.927	0.212946
42	228.089	0.613697
43	267.408	1.47845
44	112.381	-0.512245
45	234.487	0.898976
46	190.268	0.757836
47	204.486	0.366577
48	140.681	0.231043
49	261.098	0.539162
50	158.377	0.859728
51	214.239	1.51189
52	296.814	-0.0969633
53	215.862	0.172744
54	233.643	0.238007
55	275.582	0.639169
56	291.596	-0.143483
57	272.779	0.529401
58	155.609	0.295607
59	141.55	0.596814
60	221.58	1.12764
61	170.69	0.182516
62	99.4373	0.260611
63	292.324	0.903703
64	174.182	0.716853
65	225.317	0.0425509
66	174.688	-1.2323
67	125.491	1.02113
68	299.259	-0.933122
69	235.594	1.01567
70	263.371	0.198314
71	228.902	1.02898
72	198.396	0.392312
73	219.655	-0.45129
74	288.646	1.38255
75	267.649	-1.05554
76	182.823	-1.09434
77	210.449	-0.21409
78	229.703	1.46651
79	201.25	0.721395
80	100.498	-0.862305
81	268.504	1.50127
82	287.986	0.556998
83	175.005	-1.38824
84	109.276	-0.367798
85	250.199	1.10923
86	120.362	-1.09816
87	165.368	0.511449
88	227.017	0.751972
89	275.037	1.17859
90	356.318	0.0661663
91	197.939	1.24439
92	251.784	-1.14985
93	228.081	1.28836
94	240.029	-0.00936851
95	201.8	-0.301315
96	115.318	-1.2828
97	236.812	0.427512
98	101.459	0.0421423
99	179.815	0.000198988
100	218.953	-1.0392
101	171.65	-1.05886
102	211.555	-1.35305
103	203.676	-1.50532
104	228.419	-1.00447
105	304.543	0.876075
106	243.685	0.941124
107	135.612	-0.178761
108	177.527	-0.86199
109	196.571	0.661882
110	130.825	0.57018
111	113.129	-0.243886
112	78.1051	-0.423873
113	196.14	-0.766467
114	148.001	-0.0525942
115	138.874	-0.64998
116	192.147	0.736209
117	111.663	-1.43979
118	188.238	1.38365
119	104.717	0.124433
120	218.529	-0.467897
121	111.975	-0.0219831
122	146.237	-0.206547
123	139.61	-0.0815391
124	74.6117	-0.225844
125	214.39	-0.583368
126	201.11	1.01765
127	201.061	0.749097
128	127.522	-0.277527
129	122.116	0.118148
130	147.268	-0.0692365
131	150.089	-0.171467
132	167.843	-0.550047
133	225.992	-0.458948
134	180.398	0.579802
135	150.572	0.655862
136	176.051	0.143403
137	183.981	-0.0343056
138	118.074	0.183214
139	121.266	-1.34602
140	168.565	0.0386619
141	179.605	-0.91984
142	113.751	0.369663
143	142.459	0.287267
144	197.267	0.396245
145	201.189	0.282295
146	183.079	0.220798
147	193.936	-0.197242
148	214.341	-0.277357
149	161.937	0.00801718
150	177.885	-0.192198
151	195.088	-0.514011
152	237.705	-0.505569
153	95.9931	-0.721274
154	175.012	0.0622436
155	224.719	0.534349
156	208.059	0.232441
157	227.821	-0.200542
158	203.028	0.306798
159	164.286	-0.556677
160	133.143	0.216139
161	179.585	-0.693145
162	103.244	0.2447
163	141.927	0.702665
164	245.727	-0.218425
165	264.958	-0.367456
166	147.388	-0.228652
167	211.115	-0.0690643
168	116.759	-1.54991
169	222.944	-0.529656
170	191.446	0.316097
171	268.322	-0.254456
172	146.628	0.23011
173	186.176	-0.145955
174	190.769	0.100857
175	266.585	0.0354627
176	207.733	0.42527
177	233.733	-0.311225
178	210.889	0.574524
179	197.301	0.114634
180	265.466	-0.0853771
181	245.65	-0.0177708
182	271.724	0.0947201
183	214.33	0.0612004
184	306.19	0.121551
185	340.352	0.231844
186	265.569	0.0720527
187	305.803	0.187711
188	336.884	0.100523
189	336.232	0.17009
190	382.612	0.0572966
191	372.795	0.28191
192	415.046	0.124507
193	448.391	0.202827
194	398.885	0.177999
195	393.693	0.208662
196	399.156	0.261733
197	435.875	0.0973844
198	436.708	0.180724
199	446.975	0.163662
200	416.01	0.222055
201	451.336	0.327902
202	523.434	0.132581
203	536.614	0.139471
204	479.315	0.0820922
205	506.421	0.173547
206	533.826	0.17539
207	490.025	0.126813
208	485.243	0.111669
209	487.621	0.124936
210	545.867	0.118973
211	529.343	0.149475
212	446.87	0.146126
213	514.388	0.0913301
214	466.247	0.0813056
215	401.142	0.0419159
216	496.75	0.115559
217	524.835	0.0686306
218	517.438	0.0384133
219	469.115	0.0756782
220	460.062	0.185192
221	573.781	0.0616348
222	515.046	0.100164
223	520.348	0.166859
224	544.071	0.0999489
225	522.685	0.0871902
226	484.166	0.149092
227	518.843	0.0800876
228	514.549	0.0795238
229	503.517	0.160146
230	507.293	0.127362
231	532.232	0.128648
232	545.796	0.0925321
233	517.581	0.150903
234	473.644	0.170893
235	469.725	0.138516
236	463.555	0.157334
237	473.481	0.101943
238	491.337	0.0945756
239	460.118	0.187551
240	456.101	0.131698
241	470.795	0.0768982
242	545.892	0.0798163
243	561.775	0.194586
244	533.574	0.0633949
245	529.349	0.132106
246	620.64	0.0468498
247	563.451	0.156444
248	495.943	0.106373
249	592.438	0.145576
250	457.218	0.169856
251	561.758	0.0450822
252	462.567	0.0758665
253	488.345	0.103283
254	551.62	0.0523566
255	467.356	0.228615
256	488.659	0.09076
257	490.422	0.125795
258	524.949	0.0970601
259	495.788	0.000964903
260	556.414	0.120339
261	570.98	0.0769959
262	519.503	0.0377197
263	501.509	0.192716
264	509.912	0.211767
265	516.877	0.121985
266	500.691	0.122574
267	505.537	0.139634
268	523.137	0.136114
269	543.4	0.123344
270	540.406	0.0143345
271	567.264	0.0875584
272	534.371	0.13779
273	482.041	0.109939
274	454.745	0.187507
275	475.326	0.261646
276	480.01	0.151184
277	485.249	0.105489
278	452.569	0.180387
279	384.475	0.253763
280	555.632	0.123816
281	528.42	0.0601289
282	513.827	0.145637
283	494.448	0.0295818
284	446.111	0.229963
285	492.287	0.219866
286	494.07	0.109728
287	499.311	0.100655
288	508.589	0.0855958
289	436.887	0.101195
290	471.125	0.103231
291	506.237	0.0845743
292	441.291	0.0578348
293	485.201	0.164614
294	526.276	0.035873
295	480.865	0.0299467
296	485.194	0.142163
297	578.187	0.0640832
298	521.494	0.102782
299	520.342	0.15826
300	479.018	0.0404079
301	477.557	0.132838
302	477.525	0.0807725
303	543.236	0.163605
304	476.712	0.138628
305	541.965	0.106967
306	551.951	0.0687803
307	552.437	0.0694327
308	489.499	0.133872
309	532.486	0.0956569
310	544.901	0.157311
311	497.943	0.0928191
312	511.119	0.15084
313	582.474	0.124972
314	534.657	0.119765
315	537.289	0.105277
316	555.651	0.138976
317	606.587	0.148659
318	551.113	0.148641
319	565.494	0.0870222
320	568.586	0.103586
321	514.461	0.0740745
322	512.918	0.133608
323	476.684	0.108073
324	510.057	0.145073
325	502.481	0.118722
326	500.937	0.186126
327	546.58	0.0602489
328	602	0.160727
329	512.097	0.0587375
330	443.357	0.111368
331	471.243	0.133086
332	508.657	0.0645224
333	485.953	0.127604
334	539.644	0.132509
335	487.954	0.104374
336	553.635	0.106579
337	486.318	0.189777
338	509.841	0.105186
339	495.634	0.0259117
340	475.82	0.171763
341	474.763	0.227899
342	473.262	0.146065
343	491.307	0.171642
344	500.021	0.074942
345	546.776	0.085169
346	489.438	0.137126
347	517.032	0.0877222
348	534.423	0.169341
349	554.382	0.158976
350	508.889	0.0535097
351	553.299	0.0964483
352	532.621	0.210889
353	493.648	0.124767
354	510.88	0.129649
355	505.211	0.130914
356	468.1	0.142598
357	479.378	0.0858164
358	524.15	0.14482
359	536.689	0.195766
360	487.519	0.0700162
361	438.017	0.0861112
362	460.795	0.187247
363	519.281	0.142894
364	458.964	0.170257
365	558.24	0.21655
366	488.471	0.164963
367	506.394	0.121587
368	516.295	0.0877346
369	504.207	0.148353
370	481.254	0.138539
371	498.786	0.155037
372	527.198	0.123681
373	475.442	0.168679
374	457.232	0.154134
375	577.006	0.106003
376	476.19	0.0397081
377	562.42	0.0979243
378	512.598	0.0878164
379	502.645	0.146347
380	499.923	0.132267
381	505.801	0.123238
382	515.309	0.124748
383	485.534	0.0676524
384	466.104	0.113474
385	494.439	0.142925
386	525.617	0.114746
387	498.605	0.0875853
388	469.39	0.159959
389	487.951	0.199227
390	540.023	0.0629293
391	494.143	0.105667
392	464.843	0.161128
393	522.576	0.148093
394	532.442	0.192227
395	538.931	0.132115
396	556.035	0.0985035
397	516.703	0.166953
398	540.051	0.057501
399	498.697	0.138046
400	514.617	0.128596
401	486.682	0.146216
402	494.637	0.150357
403	539.135	0.110998
404	531.52	0.0731824
405	546.781	0.0783451
406	516.982	0.105913
407	492.346	0.0213368
408	501.016	0.169428
409	504.031	0.0880332
410	503.657	0.0919084
411	521.853	0.100618
412	468.72	0.183528
413	520.861	0.169786
414	474.321	0.0909378
415	465.989	0.12886
416	478.652	0.0971137
417	501.518	0.122316
418	421.249	0.0567898
419	481.578	0.226327
420	511.281	0.138399
421	494.59	0.142516
422	484.157	0.0429437
423	496.679	0.0364129
424	446.389	0.13458
425	488.094	0.101905
426	490.401	0.23172
427	500.112	0.164046
428	552.621	0.0622846
429	516.757	0.0937808
430	461.84	0.119735
431	529.608	0.14858
432	485.363	0.00443618
433	517.004	0.0258919
434	465.701	0.175771
435	444.299	0.166875
436	531.622	0.242329
437	440.89	0.176676
438	472.776	0.157456
439	485.149	0.110538
440	480.153	0.0998104
441	443.683	0.214606
442	487.916	0.169598
443	476.394	0.126164
444	499.596	0.170556
445	509.353	0.132067
446	488.463	0.139694
447	417.575	0.159581
448	549.823	0.000294831
449	518.06	0.070628
450	528.132	0.194202
451	520.554	0.161414
452	455.475	0.0951869
453	468.624	0.222922
454	499.165	0.109357
455	521.662	0.203021
456	564.532	0.0838351
457	501.444	-0.016893
458	498.545	0.139407
459	489.603	0.107691
460	502.443	0.14311
461	479.649	0.127849
462	504.152	0.196768
463	517.679	0.0515724
464	551.908	0.0628177
465	481.234	0.115952
466	551.976	0.0838866
467	467.677	0.138144
468	554.324	0.128085
469	520.291	0.166405
470	531.85	0.155493
471	460.559	0.122121
472	476.291	0.115123
473	540.289	0.0938291
474	467.167	0.169028
475	496.024	0.162335
476	565.586	0.13864
477	551.604	0.170944
478	528.272	0.114445
479	517.846	0.109978
480	493.604	0.172819
481	482.805	0.0292162
482	508.977	0.00954525
483	485.47	0.0816469
484	546.336	0.252993
485	478.249	0.0641707
486	509.284	0.101316
487	533.768	0.0493021
488	500.514	0.111248
489	490.031	0.146402
490	498.52	0.0802875
491	485.146	0.166184
492	533.395	0.14171
493	471.506	0.122181
494	480.897	0.133222
495	428.42	0.123681
496	473.369	0.0435659
497	517.525	0.0762033
498	515.186	0.0953821
499	521.712	0.110363
500	528.528	0.131351
501	537.013	0.0975093
502	532.59	0.175566
503	522.787	0.18475
504	502.131	0.0749607
505	525.199	-0.00995144
506	474.005	0.0111168
507	475.164	0.0503446
508	503.375	0.140693
509	486.977	0.0313709
510	519.414	0.103398
511	511.422	0.0646064
512	511.759	0.0219462
513	523.646	0.0293365
514	502.789	0.069514
515	551.058	0.126923
516	511.308	0.0826641
517	498.184	0.0930127
518	526.569	0.096922
519	498.038	0.095174
520	512.103	0.088455
521	490.554	0.204535
522	467.6	0.108486
523	475.036	0.137008
524	509.629	0.119638
525	556.029	0.124678
526	558.794	0.14221
527	558.339	0.0410331
528	510.001	0.16624
529	453.815	0.177682
530	514.048	0.131732
531	505.472	0.127569
532	480.764	0.120795
533	460.084	0.118729
534	463.147	0.11845
535	447.737	0.196787
536	525.572	0.0747547
537	532.426	0.0775283
538	531.798	0.065201
539	498.646	0.0199345
540	416.402	0.149627
541	494.666	0.107529
542	467.948	0.197683
543	531.009	0.0438966
544	494.491	0.0449824
545	476.825	0.0459815
546	454.644	0.0706608
547	507.432	0.135514
548	544.259	0.132182
549	500.339	0.0964236
550	476.371	0.067418
551	413.722	0.0461079
552	468.964	0.0621367
553	536.712	0.1264
554	529.199	0.115049
555	531.334	0.0465527
556	616.175	0.129218
557	498.29	0.0638807
558	531.262	0.0708152
559	505.813	0.0606138
560	489.773	0.126959
561	586.561	0.132691
562	481.509	0.0458772
563	419.988	0.0673148
564	505.988	0.0142349
565	556.878	0.142735
566	558.436	0.163749
567	502.82	0.099782
568	524.053	0.0692436
569	524.201	0.109992
570	558.324	0.13232
571	528.627	0.0769999
572	586.017	0.0905022
573	555.039	0.0564532
574	552.533	0.0703513
575	535.04	0.0941834
576	528.225	0.172669
577	554.632	0.115015
578	585.55	0.109207
579	571.066	0.118519
580	513.154	0.135812
581	517.491	0.10374
582	491.678	0.0398886
583	528.849	0.0939996
584	495.748	0.104692
585	539.107	0.080554
586	515.611	-0.0170447
587	394.773	0.171193
588	454.661	0.169318
589	492.143	0.186994
590	457.435	0.132992
591	493.166	0.0946509
592	445.208	0.227291
593	495.535	0.143945
594	513.223	0.184821
595	491.443	0.150209
596	512.564	0.138386
597	522.615	0.0815608
598	475.327	0.192893
599	548.926	0.204133
600	464.555	0.0846542
601	491.417	0.199307
602	480.812	0.176608
603	515.227	0.171432
604	474.627	0.0938524
605	548.453	0.128402
606	542.736	0.187327
607	516.992	0.251669
608	531.155	0.100796
609	413.456	0.192622
610	423.57	0.154177
611	447.406	0.0995703
612	518.738	0.140685
613	538.813	0.0904909
614	520.716	0.202357
615	481.681	0.105398
616	479.756	0.230364
617	491.455	0.151175
618	514.217	0.0734725
619	438.907	0.146824
620	516.703	0.0725742
621	554.537	0.088886
622	547.145	0.0917169
623	556.019	0.125559
624	502.128	0.155696
625	506.38	0.116014
626	486.878	0.132082
627	456.116	0.155111
628	522.943	0.125978
629	514.182	0.0926484
630	536.603	0.0440705
631	476.882	0.164984
632	495.755	0.120242
633	465.011	0.107868
634	496.471	0.0877777
635	528.135	0.0424976
636	560.281	0.165904
637	517	0.145281
638	502.244	0.0501308
639	478.256	0.210652
640	514.238	0.0337747
641	512.474	0.0452994
642	514.015	0.166418
643	537.426	0.0643848
644	531.485	0.0492809
645	533.877	0.0859036
646	447.399	0.0883294
647	498.777	0.145556
648	537.483	0.0912146
649	538.309	0.142748
650	524.866	0.130618
651	495.969	0.0832915
652	577.27	0.0624428
653	525.142	0.0787712
654	510.41	0.0853297
655	500.947	0.0870725
656	530.676	0.114993
657	499.352	0.126749
658	512.159	0.182629
659	540.052	0.090118
660	514.128	0.18616
661	517.193	0.197233
662	532.138	0.0735401
663	549.736	0.100183
664	517.624	0.100363
665	530.568	0.463564
666	287.822	1.12524
667	153.262	1.51386
668	208.106	-1.5708
669	193.173	1.22838
670	265.99	0.665738
671	137.941	-0.485675
672	202.825	-0.933031
673	156.5	-0.479116
674	190.058	0.984669
675	115.593	0.574542
676	263.737	1.06987
677	228.389	-0.486687
678	175.989	-0.417583
679	180.415	-1.01382
680	175.976	-1.53158
681	213.853	0.783384
682	292.706	0.126381
683	120.618	-0.552762
684	171.42	-1.49548
685	131.003	1.01446
686	203.006	1.28032
687	159.529	0.534204
688	237.866	-0.632631
689	256.532	0.737191
690	225.122	0.0150915
691	236.637	0.879643
692	203.591	0.747494
693	174.935	-1.52494
694	174.026	-1.48541
695	223.4	0.881188
696	104.535	0.43832
697	152.789	1.55285
698	255.02	1.40518
699	218.43	-0.12628
700	260.728	-0.272536
701	131.639	1.05994
702	223.235	-0.614499
703	251.113	-0.538523
704	280.309	0.5107
705	257.516	0.0143729
706	194.78	-1.45724
707	272.754	1.32779
708	180.271	1.37049
709	183.413	1.26985
710	241.979	0.886468
711	196.274	0.234997
712	83.0145	0.996879
713	268.876	0.294715
714	75.4241	1.0756
715	209.808	-1.28229
716	216.973	1.51063
717	221.39	0.971077
718	216.178	1.22377
719	151.693	0.622327
720	172.852	1.06962
721	170.016	0.549952
722	55.473	-1.23003
723	91.7921	-0.560858
724	134.244	0.169065
725	177.99	-1.38758
726	158.92	-1.50294
727	110.797	-1.47968
728	132.701	-1.23181
729	177.776	1.19872
730	243.901	-0.631418
731	223.226	0.708048
732	117.694	-1.2534
733	157.765	-1.34997
734	148.928	1.1492
735	163.089	0.29019
736	113.484	1.51463
737	91.7402	0.828879
738	246.802	-0.00502799
739	146.886	-0.277819
740	123.889	-0.271544
741	200.037	-0.296632
742	138.059	-0.389353
743	191.019	-0.148036
744	218.679	0.00816547
745	210.675	-0.0904148
746	175.251	0.406651
747	261.829	-0.256336
748	199.297	0.440174
749	289.498	0.0864219
750	289.47	-0.0248368
751	302.596	0.146488
752	287.976	0.175092
753	268.907	0.173906
754	330.585	-0.0497664
755	321.366	0.24011
756	351.343	0.132815
757	372.556	0.0569635
758	363.18	0.128226
759	319.408	0.188644
760	269.415	0.211015
761	369.229	0.150606
762	416.024	0.127096
763	400.226	0.274961
764	404.588	0.145217
765	441.063	0.23154
766	418.129	0.192149
767	460.107	0.20366
768	371.467	0.0430054
769	385.426	0.133961
770	437.978	0.0469292
771	403.149	0.0416363
772	457.459	0.107513
773	417.984	0.116452
774	454.102	0.16385
775	413.335	0.120963
776	453.205	0.123578
777	370.899	0.0774348
778	480.226	0.107841
779	466.87	0.162976
780	472.421	0.00702489
781	484.915	0.170774
782	421.648	0.154077
783	434.689	0.0937185
784	458.119	0.242599
785	512.059	0.032373
786	393.852	0.153056
787	481.313	0.150433
788	538.4	0.0445969
789	536.894	0.163809
790	441.683	0.256649
791	493.546	0.0488673
792	437.083	0.225731
793	468.987	0.0558936
794	512.515	0.151756
795	500.766	0.152706
796	495.147	0.0280224
797	523.574	0.149557
798	499.702	0.172012
799	523.445	0.0820205
800	496.58	0.144684
801	556.943	0.0970559
802	533.522	0.121657
803	539.009	0.268093
804	509.914	0.152967
805	482.841	0.0808095
806	475.001	0.0965523
807	525.603	0.0696755
808	561.651	0.137968
809	508.733	0.0861827
810	509.529	0.161715
811	389.909	0.123043
812	520.62	0.196482
813	521.273	0.117817
814	527.357	0.173018
815	507.494	0.101763
816	487.634	0.18839
817	462.048	0.109859
818	528.741	0.213769
819	505.142	0.11354
820	472.338	0.116057
821	464.447	0.144116
822	504.733	0.126741
823	492.221	0.144199
824	556.534	0.0929833
825	559.505	-0.0260992
826	496.475	0.0729004
827	486.617	0.181239
828	514.534	0.167238
829	531.695	0.167978
830	500.155	0.113093
831	498.162	0.13053
832	503.852	0.104393
833	445.765	0.147847
834	523.667	0.200806
835	527.543	0.0669326
836	511.187	0.229241
837	437.155	0.142073
838	450.323	0.251764
839	471.035	0.0769837
840	484.023	0.0912592
841	468.418	0.165426
842	432.515	0.138953
843	480.948	0.227885
844	505.998	0.181671
845	483.291	0.106035
846	507.056	0.110808
847	522.073	0.131207
848	486.462	0.0720249
849	492.323	0.151196
850	470.455	0.20323
851	441.428	0.137601
852	507.476	0.0765959
853	517.087	0.141289
854	531.278	0.0627504
855	487.063	0.0665987
856	441.925	0.134207
857	484.284	0.173139
858	509.7	0.0401995
859	491.069	0.100499
860	453.625	0.0709251
861	526.248	0.14656
862	532.853	0.2114
863	474.548	0.158603
864	528.684	0.0318276
865	457.357	0.136272
866	519.417	0.0598259
867	533.036	0.138254
868	507.622	0.138211
869	512.07	0.171297
870	503.09	0.118153
871	516.275	0.0818153
872	479.31	0.120038
873	493.185	0.0923677
874	509.344	0.144954
875	559.595	0.097486
876	522.295	0.157997
877	510.789	0.11981
878	464.283	0.110368
879	492.791	0.131442
880	483.286	0.0761574
881	521.193	0.114002
882	496.8	0.185105
883	507.087	0.0459269
884	509.806	0.116252
885	536.352	0.115353
886	534.175	0.0566808
887	511.948	0.134713
888	553.961	0.0920682
889	515.204	0.209372
890	486.22	0.13196
891	546.515	0.114876
892	489.567	0.0856766
893	502.21	0.0891978
894	507.91	0.102883
895	529.981	0.137651
896	519.058	0.0644701
897	523.803	0.0745023
898	443.594	0.143437
899	463.891	0.131512
900	507.978	0.188246
901	510.078	0.00344774
902	165.706	1.16546
903	164.385	-0.426433
904	156.931	1.33189
905	226.845	0.797111
906	196.231	-1.25766
907	183.703	-0.606005
908	143.696	-0.245775
909	60.5046	0.840175
910	85.028	1.5708
911	151.312	0.330114
912	161.952	1.15358
913	224.043	1.35594
914	193.115	1.09687
915	252.311	0.809269
916	265.028	0.616238
917	145.974	-0.914485
918	241.426	1.53878
919	172.371	-0.768234
920	121.312	-1.25934
921	285.247	-0.1288
922	75.5942	-1.51624
923	278.93	0.0796144
924	61.4922	0.262252
925	250.823	0.967981
926	287.658	0.267789
927	132.839	0.529199
928	227.65	0.645408
929	252.875	0.857722
930	226.61	0.644311
931	247.849	0.779408
932	225.795	1.31546
933	174.536	0.0899923
934	195.148	-1.11565
935	117.13	0.332854
936	174.937	-1.2276
937	144.102	0.324311
938	250.915	1.22369
939	257.83	0.39473
940	220.253	0.632336
941	197.593	0.898938
942	154.954	-1.46593
943	236.681	-0.138772
944	180.875	0.974449
945	175.522	-1.43936
946	158.501	0.576841
947	175.388	0.728689
948	193.379	0.812175
949	231.458	0.00526124
950	156.093	-0.0382204
951	149.533	1.536
952	199.788	0.953481
953	272.707	0.432647
954	195.964	0.678629
955	214.669	-1.46225
956	204.5	0.457916
957	186.253	-1.16951
958	256.963	1.41011
959	225.328	0.674314
960	277.966	-0.217442
961	231.711	1.24165
962	177.921	1.19113
963	216.838	1.41274
964	302.326	1.34403
965	280.767	-0.171821
966	158.691	0.400306
967	200.941	0.811207
968	229.785	0.77066
969	183.526	0.86849
970	222.857	0.52072
971	233.677	0.532222
972	282.969	-0.0454132
973	91.1152	-1.28851
974	341.538	0.852901
975	205.654	-0.286282
976	285.496	0.147811
977	146.737	0.774019
978	210.483	0.920586
979	168.588	0.436047
980	164.844	-1.43683
981	263.382	0.266593
982	242.674	0.228931
983	298.903	-0.0649708
984	214.777	0.881438
985	241.23	1.05479
986	167.457	1.33537
987	212.248	0.975938
988	51.9806	0.510382
989	214.044	-1.00644
990	127.797	0.798395
991	142.526	-1.32219
992	57.9254	1.44454
993	206.798	0.8843
994	234.688	0.44413
995	131.968	0.853968
996	284.451	1.36798
997	193.095	0.736883
998	249.709	1.2342
999	214.901	0.546256
1000	256.081	-1.30026
1001	150.964	0.975944
1002	200.587	0.413552
1003	124.999	1.12768
1004	175.7	1.00745
1005	249.801	0.230861
1006	299.916	0.416149
1007	136.789	1.19111
1008	80.0459	1.04246
1009	233.039	0.178642
1010	164.413	-0.316648
1011	230.591	-0.907881
1012	306.383	1.36824
1013	200.116	0.343134
1014	213.908	0.583549
1015	183.293	1.27206
1016	160.045	-1.48613
1017	190.502	-1.1997
1018	152.937	0.696751
1019	130.175	0.0124084
1020	172.592	-0.840256
1021	58.6539	-0.780651
1022	148.33	-0.508181
1023	137.638	-0.305192
1024	144.195	-1.28339
1025	156.111	0.682209
1026	156.258	0.0864847
1027	238.985	1.22307
1028	179.565	0.409513
1029	147.314	0.481646
1030	191.919	1.55058
1031	276.178	1.20317
1032	201.788	-0.333784
1033	182.055	0.043221
1034	131.722	0.464562
1035	183.653	-0.231709
1036	213.353	-0.303557
1037	309.286	-0.292717
1038	211.936	-1.4332
1039	270.383	-0.896866
1040	337.251	-0.35367
1041	268.319	0.641578
1042	279.509	0.360546
1043	160.16	0.675337
1044	191.067	0.804492
1045	245.427	1.29172
1046	276.443	0.705067
1047	146.481	1.27474
1048	311.003	0.728148
1049	150.53	1.3615
1050	135.645	1.1358
1051	167.866	0.0495319
1052	205.513	1.13786
1053	242.987	0.626188
1054	186.957	0.396853
1055	193.764	1.54417
1056	274.086	-1.50065
1057	218.714	0.0883334
1058	112.684	1.55482
1059	141.71	0.0260098
1060	248.851	1.35052
1061	277.54	1.14989
1062	124.226	1.1627
1063	266.837	0.943578
1064	129.793	-1.37166
1065	143.121	0.820685
1066	219.443	-0.694216
1067	239.165	-0.78578
1068	165.531	-0.199551
1069	236.206	0.834733
1070	154.325	-0.501043
1071	137.094	1.26239
1072	199.51	0.145053
1073	189.272	0.241212
1074	125.907	-0.237235
1075	238.952	-1.51769
1076	160.74	0.128982
1077	348.732	-0.0659027
1078	244.662	-0.614283
1079	155.092	0.2504
1080	232.519	0.715791
1081	182.728	-0.140484
1082	212.159	1.4574
1083	219.436	0.586264
1084	233.378	-1.3405
1085	236.459	-1.31678
1086	225.707	0.381193
1087	275.99	-0.990807
1088	135.378	0.124694
1089	226.066	0.782092
1090	111.385	1.37806
1091	140.664	-1.39413
1092	275.245	0.367674
1093	165.673	-1.17289
1094	194.764	-0.194273
1095	171.42	-0.0853872
1096	179.881	-1.44725
1097	192.791	1.45175
1098	259.29	1.00098
1099	203.348	1.13659
1100	145.376	1.35498
1101	258.809	-1.11238
1102	174.077	-0.995363
1103	156.948	0.0393828
1104	229.5	0.787918
1105	108.477	1.27308
1106	216.196	-0.224127
1107	224.338	-0.0253417
1108	227.863	-1.35807
1109	309.67	1.36989
1110	119.095	-1.26402
1111	226.75	-0.4721
1112	93.3942	-0.955743
1113	140.472	1.45478
1114	115.319	0.890679
1115	139.828	-0.999602
1116	231.202	0.437385
1117	177.875	1.06989
1118	194.609	1.38476
1119	137.876	1.05765
1120	187.954	0.0331959
1121	195.171	0.234888
1122	221.004	0.684419
1123	91.4017	0.445336
1124	86.6059	1.29692
1125	232.177	0.158315
1126	69.3966	0.744861
1127	262.634	0.817552
1128	264.536	0.86034
1129	192.567	-1.25674
1130	110.909	0.237025
1131	230.344	0.662093
1132	213.563	-0.551165
1133	174.868	1.13166
1134	166.115	0.974016
1135	179.908	-0.0531342
1136	218.196	0.824377
1137	199.541	0.844995
1138	224.264	1.11837
1139	226.195	-0.0507288
1140	186.314	0.594179
1141	232.319	0.935802
1142	297.361	0.619126
1143	315.759	0.0982771
1144	152.469	-1.42392
1145	88.9479	-0.851949
1146	222.687	0.922121
1147	225.713	0.778518
1148	63.3144	0.272389
1149	248.475	1.46315
1150	127.269	-0.208583
1151	260.787	0.475323
1152	152.273	0.742419
1153	176.547	0.460648
1154	153.856	0.188135
1155	157.868	0.507662
1156	201.533	1.33884
1157	158.155	-1.22071
1158	142.521	-0.172433
1159	214.297	0.550352
1160	184.746	0.14948
1161	231.769	0.794263
1162	247.712	-0.119669
1163	276.751	-0.201948
1164	95.3356	0.771807
1165	226.529	0.615775
1166	129.649	0.301619
1167	263.87	0.307264
1168	161.043	0.121838
1169	158.022	-0.0857196
1170	216.651	-1.44896
1171	259.214	0.987455
1172	279.937	0.467852
1173	217.601	0.92052
1174	109.649	-0.8747
1175	190.191	1.19832
1176	257.645	1.22131
1177	300.931	0.842084
1178	181.267	-0.661186
1179	202.748	-0.199809
1180	166.106	1.3467
1181	280.552	0.635286
1182	92.0413	-1.20772
1183	185.424	-0.252692
1184	163.124	0.933595
1185	176.227	-0.430945
1186	260.1	0.608889
1187	262.219	1.47212
1188	152.574	1.34843
1189	118.204	-0.791127
1190	245.256	0.788973
1191	96.3791	-0.139089
1192	220.068	1.29208
1193	204.534	-0.862682
1194	245.376	-1.05579
1195	140.201	1.08235
1196	197.521	1.34654
1197	306.466	-0.562904
1198	188.298	0.855942
1199	240.758	0.356568
1200	230.141	1.07289
1201	181.527	0.800071
1202	196.788	-1.42229
1203	256.007	1.04985
1204	277.488	0.80576
1205	108.195	-0.524997
1206	109.94	-1.47858
1207	248.629	0.795632
1208	248.57	-0.292514
1209	224.139	0.586266
1210	107.839	0.123278
1211	262.292	0.992863
1212	305.952	1.04157
1213	219.456	0.936787
1214	233.808	0.995704
1215	242.886	0.193815
1216	196.86	0.539488
1217	270.773	0.68559
1218	169.71	0.425832
1219	217.718	0.219184
1220	205.532	1.07405
1221	223.592	0.774146
1222	104.131	1.38149
1223	206.691	-0.41598
1224	133.538	1.39334
1225	206.603	0.23367
1226	203.919	0.952756
1227	269.397	0.487654
1228	304.105	-1.01253
1229	219.475	-1.43846
1230	288.254	-1.33727
1231	253.62	-0.615244
1232	198.712	-1.50291
1233	323.785	-0.260561
1234	341.933	0.910713
1235	244.64	0.382225
1236	79.7657	-1.45817
1237	246.064	1.4429
1238	190.499	0.784247
1239	221.438	0.0225828
1240	216.967	-0.0595528
1241	262.353	1.32233
1242	261.587	0.373188
1243	264.228	0.666676
1244	141.16	-0.611474
1245	243.812	-1.46957
1246	232.659	1.11915
1247	179.486	0.465765
1248	213.756	0.3075
1249	190.958	-0.731742
1250	213.417	0.869211
1251	175.528	1.17535
1252	312.895	-1.02297
1253	195.551	0.912438
1254	193.225	-0.0547836
1255	158.399	0.987803
1256	115.022	0.613069
1257	67.3973	-0.157725
1258	295.234	0.765107
1259	299.231	1.00192
1260	228.438	1.33159
1261	204.909	0.137863
1262	204.294	1.09598
1263	188.009	-1.31786
1264	174.705	1.24831
1265	193.523	0.329276
1266	208.149	-1.00132
1267	224.671	0.782754
1268	335.888	0.235891
1269	206.092	-0.752984
1270	251.097	-1.29644
1271	171.628	-0.535992
1272	218.547	-0.264813
1273	197.678	1.14489
1274	138.293	0.229981
1275	195.835	-1.00855
1276	112.721	1.5708
1277	233.056	-0.420571
1278	273.691	0.604464
1279	205.392	0.626715
1280	172.016	0.547295
1281	225.413	-0.835572
1282	278.395	0.991669
1283	253.093	1.08496
1284	262.108	0.850778
1285	90.0207	0.49302
1286	142.509	-0.406881
1287	203.638	0.699625
1288	276.619	0.474448
1289	209.887	0.43467
1290	127.704	1.24481
1291	210.597	-1.48741
1292	250.485	-1.30946
1293	92.2354	-0.961903
1294	208.176	-0.493039
1295	125.623	1.5708
1296	235.666	0.809299
1297	212.468	-1.25844
1298	135.44	1.19158
1299	172.168	0.347155
1300	118.204	0.704098
1301	142.628	-1.30745
1302	208.598	1.08506
1303	228.265	0.322531
1304	125.754	-0.0299177
1305	230.613	1.51126
1306	328.17	0.311149
1307	236.981	-0.202307
1308	151.253	1.1411
1309	110.839	-0.549985
1310	198.936	1.49592
1311	230.168	1.49345
1312	172.216	0.996226
1313	266.455	-1.29772
1314	89.6514	-0.974991
1315	188.575	1.50959
1316	168.265	-1.47762
1317	228.535	1.39428
1318	120.816	-1.14811
1319	182.542	0.577397
1320	245.494	1.37643
1321	100.407	0.169561
1322	328.569	1.22737
1323	164.798	-0.0404572
1324	108.211	-0.265068
1325	211.701	0.916019
1326	187.561	-1.56005
1327	223.498	-1.28165
1328	231.951	1.14211
1329	142.597	0.277075
1330	128.587	0.875633
1331	204.103	0.0257756
1332	128.681	-1.19407
1333	183.222	-1.33427
1334	192.048	1.45011
1335	136.671	-0.371075
1336	186.316	0.452981
1337	161.597	-1.15443
1338	177.508	0.528477
1339	180.764	-1.33638
1340	190.127	-0.377047
1341	165.591	-0.977154
1342	150.223	-1.13396
1343	162.434	-0.429255
1344	73.7915	-0.824664
1345	182.21	0.801185
1346	205.332	-0.0385638
1347	203.137	0.0244596
1348	117.522	0.267621
1349	229.781	0.643165
1350	139.193	0.190796
1351	163.79	0.288173
1352	179.98	0.15339
1353	183.917	0.302369
1354	197.958	0.156405
1355	189.866	0.0894751
1356	247.705	-0.025015
1357	216.2	0.0575522
1358	274.915	0.168358
1359	348.859	-0.0310898
1360	305.961	-0.124194
1361	355.029	0.164596
1362	381.409	0.149784
1363	354.524	0.191877
1364	374.627	0.19074
1365	419.04	0.20358
1366	454.421	0.192771
1367	462.291	0.137397
1368	476.943	0.125465
1369	514.486	0.0825367
1370	388.383	0.104474
1371	450.228	0.225256
1372	419.313	0.149219
1373	483.628	0.109219
1374	504.43	0.118907
1375	457.715	0.231914
1376	414.584	0.159786
1377	427.638	0.153757
1378	402.623	0.11187
1379	442.395	0.127388
1380	390.036	0.294292
1381	361.549	0.260107
1382	404.637	0.380053
1383	399.989	0.291821
1384	398.872	0.422363
1385	446.668	0.259176
1386	477.034	0.183283
1387	440.745	0.269908
1388	472.354	0.230965
1389	462.584	0.205702
1390	413.847	0.32908
1391	409.133	0.163674
1392	467.726	0.220697
1393	419.499	0.312344
1394	407.378	0.304265
1395	466.015	0.162241
1396	421.287	0.288941
1397	451.487	0.313042
1398	414.017	0.305043
1399	438.713	0.180048
1400	450.095	0.307789
1401	434.426	0.262345
1402	409.558	0.267897
1403	436.883	0.258666
1404	449.23	0.185045
1405	476.874	0.147899
1406	395.229	0.0962833
1407	457.479	0.376193
1408	437.997	0.20937
1409	452.287	0.134991
1410	433.25	0.197191
1411	418.162	0.222694
1412	474.841	0.192058
1413	432.792	0.12694
1414	474.764	0.275698
1415	460.177	0.163686
1416	427.981	0.183555
1417	471.55	0.218648
1418	425.35	0.24649
1419	416.344	0.172531
1420	428.035	0.197949
1421	487.845	0.204609
1422	376.942	0.25547
1423	454.825	0.330152
1424	397.111	0.230155
1425	411.092	0.211631
1426	437.385	0.230285
1427	414.697	0.302256
1428	403.211	0.180962
1429	400.384	0.243195
1430	422.951	0.186695
1431	434.207	0.291645
1432	453.072	0.138139
1433	368.493	0.16961
1434	438.268	0.16794
1435	454.624	0.0628666
1436	364.128	-0.00180725
1437	416.82	0.202788
1438	408.475	0.0994666
1439	331.323	0.270429
1440	432.483	0.221831
1441	461.871	0.186738
1442	426.063	0.134746
1443	495.38	0.11767
1444	457.158	0.0346645
1445	406.279	0.178245
1446	435.207	0.146257
1447	460.333	0.0951949
1448	456.225	0.148752
1449	464.748	0.108938
1450	427.024	0.159053
1451	509.088	0.107052
1452	433.3	0.104778
1453	445.346	0.112745
1454	490.834	0.117541
1455	511.094	0.166272
1456	426.906	0.154547
1457	461.24	0.0158307
1458	443.849	0.12753
1459	463.341	0.19705
1460	450.547	0.104896
1461	500.671	0.0989278
1462	470.011	0.0999039
1463	489.246	0.0784057
1464	448.546	0.0449045
1465	466.733	0.158111
1466	527.595	0.149618
1467	518.023	0.0969532
1468	457.612	0.0262355
1469	437.457	0.0863027
1470	488.995	0.0674724
1471	547.483	0.0531735
1472	492.272	0.131842
1473	480.143	0.242758
1474	576.106	0.0676466
1475	457.541	0.0877831
1476	512.35	0.00892056
1477	504.353	0.205239
1478	525.498	0.0811549
1479	492.036	0.0568342
1480	473.772	0.125975
1481	503.521	0.0935437
1482	424.515	0.159225
1483	496.975	-0.00499854
1484	492.274	0.130794
1485	542.831	0.0803143
1486	514.503	0.0425087
1487	456.838	-0.042686
1488	500.515	0.060284
1489	506.679	0.155409
1490	495.005	0.121332
1491	543.687	0.0710682
1492	478.078	0.106745
1493	480.937	0.0970882
1494	486.716	0.0536268
1495	527.413	0.103674
1496	490.709	0.143203
1497	541.675	0.0582027
1498	527.732	0.0412927
1499	475.203	0.191732
1500	546.78	0.142712
1501	536.165	0.00632908
1502	502.423	0.0740181
1503	511.092	0.0427405
1504	523.372	0.175618
1505	517.278	-0.00321939
1506	493.905	0.116456
1507	502.181	0.185081
1508	524.408	0.0533534
1509	509.731	0.0709502
1510	469.641	0.0976886
1511	476.62	0.0640393
1512	514.002	0.156329
1513	514.155	0.0844711
1514	541.57	0.232204
1515	532.149	0.0879718
1516	487.273	0.121039
1517	516.671	0.115015
1518	526.007	0.111065
1519	549.967	0.215232
1520	546.029	0.0338102
1521	511.668	0.0944928
1522	487.635	-0.0058301
1523	522.97	0.0651194
1524	544.987	0.108777
1525	460.828	0.126675
1526	503.788	0.10567
1527	516.152	0.115585
1528	477.297	0.181732
1529	490.04	0.197573
1530	528.784	0.0656825
1531	490.658	0.0534421
1532	549.98	0.143347
1533	541.448	0.149017
1534	529.675	0.186924
1535	436.451	0.0716209
1536	454.703	0.166374
1537	509.928	0.0925137
1538	530.646	0.0776748
1539	455.187	0.00569735
1540	472.603	0.127178
1541	507.771	0.173528
1542	483.073	0.115395
1543	471.477	0.0582127
1544	490.534	0.0503516
1545	464.989	0.178177
1546	479.181	0.171817
1547	506.425	0.104628
1548	488.64	0.17731
1549	495.395	0.239184
1550	444.439	0.192357
1551	444.495	0.258636
1552	468.912	0.187871
1553	469.924	0.11928
1554	422.632	0.114539
1555	459.692	0.107145
1556	455.743	0.202604
1557	485.263	0.0792906
1558	463.311	0.0846273
1559	440.002	0.0554017
1560	488.215	0.145851
1561	462.523	0.0149026
1562	501.978	0.119049
1563	460.103	0.0883761
1564	447.252	0.0871576
1565	467.568	0.117154
1566	486.346	0.164881
1567	482.002	0.118157
1568	486.088	0.0884836
1569	486.295	0.0144765
1570	461.396	0.0685026
1571	478.269	0.100872
1572	469.758	0.182582
1573	472.9	0.216057
1574	510.282	0.0864402
1575	506.511	0.146531
1576	515.167	0.115152
1577	430.509	0.0972932
1578	467.746	0.203914
1579	432.551	0.0620872
1580	493.567	0.022556
1581	479.421	0.129925
1582	540.589	0.178121
1583	514.642	0.0799168
1584	495.724	0.10508
1585	474.568	0.0970877
1586	533.532	0.0870478
1587	495.737	0.0592696
1588	534.806	0.182229
1589	513.258	0.0543672
1590	570.458	0.0490232
1591	523.38	0.0944934
1592	465.196	0.102981
1593	493.172	0.147282
1594	559.039	0.141444
1595	522.679	0.0719379
1596	492.11	0.120649
1597	515.05	0.142235
1598	448.165	0.123901
1599	526.329	0.192338
1600	456.572	0.0945404
1601	482.65	0.188633
1602	463.585	0.104286
1603	541.884	0.168019
1604	517.094	0.0957444
1605	511.477	0.0871009
1606	497.554	0.131662
1607	501.212	0.159953
1608	492.829	0.155084
1609	483.213	0.00145885
1610	492.445	0.126524
1611	519.426	0.0457672
1612	511.692	0.0579737
1613	552.401	0.112534
1614	489.333	0.132212
1615	494.273	0.0162151
1616	539.687	0.106618
1617	523.766	0.201366
1618	505.708	0.0737295
1619	554.486	0.175859
1620	554.974	0.225862
1621	449.294	0.0458059
1622	473.769	0.169003
1623	467.4	0.202976
1624	511.057	0.0916393
1625	477.504	0.0817426
1626	501.075	0.0718324
1627	457.103	0.0996196
1628	494.749	0.0545333
1629	490.062	0.0778701
1630	493.183	0.198047
1631	412.599	0.0880908
1632	456.426	0.0972678
1633	483.166	0.116964
1634	493.922	0.10744
1635	501.824	0.185828
1636	556.303	0.0815351
1637	480.864	0.145934
1638	570.552	0.0994045
1639	555.864	0.0778775
1640	513.877	0.140708
1641	498.419	0.135453
1642	556.134	0.137661
1643	513.244	0.211574
1644	567.517	0.197955
1645	541.217	0.0661741
1646	519.549	0.185677
1647	531.438	0.0604846
1648	555.68	0.0735504
1649	521.565	0.0771106
1650	510.217	0.135977
1651	436.465	0.105005
1652	423.722	-0.118635
1653	546.98	0.0680543
1654	512.352	0.169929
1655	492.827	0.141352
1656	532.283	0.0662437
1657	487.755	0.159943
1658	522.877	0.0436633
1659	453.679	0.225961
1660	470.607	0.0336613
1661	501.555	0.12109
1662	507.735	0.120731
1663	464.137	0.0799201
1664	534.011	0.125541
1665	457.083	-0.00623893
1666	491.083	0.194138
1667	485.003	0.161188
1668	483.613	0.0999579
1669	468.002	0.0616445
1670	475.648	0.19353
1671	458.381	0.128926
1672	488.642	0.0786257
1673	433.435	0.130643
1674	470.024	0.1014
1675	481.369	0.0793897
1676	468.148	0.241562
1677	465.026	0.183923
1678	443.644	0.221135
1679	435.539	0.254287
1680	502.946	0.0521425
1681	483.643	0.124727
1682	472.917	0.158103
1683	477.453	0.0636493
1684	495.893	0.0578525
1685	497.063	0.0837766
1686	521.251	0.170899
1687	438.141	0.100325
1688	466.168	0.110664
1689	473.877	0.11273
1690	475.479	0.187383
1691	435.022	-0.0228432
1692	450.414	0.1249
1693	450.83	0.133518
1694	433.209	0.097637
1695	415.152	0.155211
1696	477.811	0.174247
1697	456.473	0.0642857
1698	495.57	0.079691
1699	464.763	0.207245
1700	447.346	0.149757
1701	495.895	0.102438
1702	447.089	0.197474
1703	480.73	0.110901
1704	474.421	0.108035
1705	466.643	0.17404
1706	508.043	0.127232
1707	405.827	0.0212924
1708	452.873	0.0753345
1709	491.787	0.108331
1710	399.492	0.104227
1711	509.493	0.144473
1712	451.769	0.150868
1713	481.25	0.105051
1714	453.621	0.163589
1715	510.242	0.132028
1716	448.091	0.118545
1717	457.032	0.127328
1718	477.284	0.121376
1719	496.373	0.130627
1720	475.111	0.115842
1721	461.128	0.132973
1722	456.488	0.166866
1723	524.953	0.160734
1724	467.771	0.0354102
1725	480.115	0.145786
1726	503.138	0.143199
1727	528.142	0.155012
1728	568.106	0.102424
1729	465.386	0.193142
1730	460.965	0.0646946
1731	500.181	0.113407
1732	572.719	0.118805
1733	534.502	0.0991609
1734	512.245	0.111854
1735	427.487	0.158375
1736	480.963	0.207612
1737	511.821	0.0946689
1738	497.933	0.124406
1739	518.364	-0.0431728
1740	448.804	0.0843489
1741	519.086	0.106316
1742	525.366	0.0709537
1743	540.16	0.130295
1744	432.738	0.200669
1745	487.921	0.0634395
1746	529.568	0.181859
1747	592.454	0.480635
1748	265.334	0.946452
1749	241.027	0.651232
1750	156.185	1.23091
1751	148.721	0.349373
1752	153.554	-1.44621
1753	288.579	-0.588843
1754	295.228	-0.629865
1755	107.16	0.217033
1756	228.9	1.30049
1757	289.593	-0.0235777
1758	197.194	0.120474
1759	192.119	-0.437696
1760	132.488	-0.582734
1761	109.331	0.179591
1762	128.125	-1.5708
1763	139.19	-0.0822978
1764	153.559	-1.23924
1765	141.429	0.744516
1766	228.192	-0.0230522
1767	256.297	-0.340708
1768	753.603	-1.13702
1769	127.259	-1.5708
1770	225.128	-0.70422
1771	198.266	-1.31338
1772	1033.06	-1.46598
1773	145.648	-1.51553
1774	166.855	1.10559
1775	268.778	1.37898
1776	194.29	1.50255
1777	228.204	-0.601025
1778	228.32	0.876844
1779	153.896	-1.33409
1780	193.852	-0.0119972
1781	176.567	0.600434
1782	131.316	0.379495
1783	134.862	-0.795022
1784	265.719	1.19598
1785	219.474	-0.365991
1786	131.119	0.659035
1787	266.014	-0.802814
1788	185.854	-0.0271723
1789	247.96	-0.0830296
1790	184.186	-0.918298
1791	162.576	-0.450385
1792	256.847	-0.353228
1793	118.629	0.999057
1794	168.616	-0.909803
1795	270.482	-0.279263
1796	170.982	0.317684
1797	206.451	-0.49414
1798	201.355	-0.429452
1799	192.905	-0.687995
1800	224.86	-0.0641048
1801	232.455	0.780149
1802	187.507	-0.646111
1803	261.873	0.411777
1804	155.833	0.327058
1805	225.988	0.331328
1806	197.421	-0.0106902
1807	274.787	0.0797094
1808	114.77	0.564042
1809	195.266	-0.118172
1810	237.854	-0.0630972
1811	278.688	0.167104
1812	225.255	-0.268734
1813	329.221	0.0588424
1814	191.708	-0.0351385
1815	310.058	0.450104
1816	364.776	0.18056
1817	242.35	0.106588
1818	301.954	0.126428
1819	318.354	-0.126113
1820	343.909	0.166225
1821	237.509	-0.00636526
1822	241.652	0.131098
1823	307.984	-0.112693
1824	334.167	0.154622
1825	297.533	0.248837
1826	289.851	0.130955
1827	394.664	0.129868
1828	447.757	0.178093
1829	393.855	0.0035659
1830	377.501	0.268794
1831	429.508	0.0802607
1832	411.698	0.280316
1833	348.862	0.0983849
1834	469.051	0.197465
1835	447.574	0.242949
1836	526.099	0.232126
1837	513.048	0.187036
1838	482.891	0.128967
1839	489.803	0.151142
1840	453.955	0.105534
1841	437.79	0.229943
1842	466.452	0.252024
1843	476.528	0.164172
1844	473.341	0.132159
1845	490.949	0.177247
1846	503.799	0.228655
1847	484.064	0.222714
1848	431.778	0.315384
1849	405.4	0.219134
1850	482.091	0.312591
1851	447.396	0.110527
1852	472.649	0.223431
1853	491.531	0.194095
1854	487.714	0.134213
1855	470.854	0.222632
1856	439.894	0.0583044
1857	480.209	0.227127
1858	456.493	0.180828
1859	433.288	0.12688
1860	517.036	0.132177
1861	474.343	0.218506
1862	455.084	0.238919
1863	488.66	0.197476
1864	464.946	0.179954
1865	460.161	0.0458174
1866	572.795	0.198263
1867	472.895	0.24923
1868	505.144	0.131965
1869	507.988	0.115575
1870	412.802	0.204626
1871	543.681	0.173487
1872	532.908	0.18223
1873	551.696	0.18223
1874	494.889	0.141653
1875	544.273	0.177067
1876	546.599	0.115769
1877	551.762	0.200368
1878	534.596	0.163374
1879	573.546	0.193383
1880	539.598	0.1151
1881	516.666	0.26261
1882	580.244	0.177775
1883	512.415	0.202143
1884	464.045	0.165855
1885	491.105	0.248835
1886	553.871	0.141205
1887	507.572	0.201563
1888	505.59	0.175855
1889	528.66	0.136963
1890	508.007	0.219556
1891	475.184	0.0574356
1892	544.496	0.178263
1893	483.499	0.142107
1894	435.799	0.185139
1895	492.904	0.238056
1896	485.883	0.0763108
1897	537.355	0.172394
1898	503.152	0.214882
1899	453.571	0.141013
1900	490.569	0.135337
1901	469.699	0.00148894
1902	414.366	0.145708
1903	465.767	0.150701
1904	391.579	0.0623559
1905	485.545	0.16629
1906	423.652	0.0598777
1907	414.078	0.198291
1908	529.658	0.0656306
1909	499.318	0.0382241
1910	453.908	0.115923
1911	481.776	0.0889459
1912	458.969	0.235434
1913	402.107	0.0822235
1914	537.7	0.180031
1915	507.008	0.114938
1916	502.339	0.134835
1917	448.14	0.228354
1918	520.541	0.259075
1919	166.432	-0.0111608
1920	210.93	-0.397657
1921	227.375	-0.714287
1922	247.012	0.782602
1923	215.579	-0.307513
1924	101.972	0.0380029
1925	258.362	1.02246
1926	192.04	0.502628
1927	206.502	0.358369
1928	249.685	0.211134
1929	162.399	-0.262725
1930	197.202	0.266588
1931	166.23	-0.990936
1932	181.889	-0.915865
1933	204.035	-0.223446
1934	143.829	0.839755
1935	209.171	0.289523
1936	193.26	-1.5708
1937	86.2817	-0.918783
1938	142.724	-0.580394
1939	203.996	-1.10275
1940	217.521	0.920239
1941	218.311	-0.444507
1942	150.961	-0.0315634
1943	182.193	-1.36677
1944	188.822	-0.880842
1945	287.171	0.0621905
1946	123.408	-1.30489
1947	140.866	-0.893541
1948	168.554	1.11883
1949	163.101	1.36294
1950	215.079	0.716111
1951	277.861	-0.721492
1952	187.518	0.614022
1953	238.04	0.246475
1954	169.989	0.255997
1955	127.408	0.641587
1956	236.78	0.372933
1957	241.408	-0.50085
1958	216.161	0.00587609
1959	240.181	0.38071
1960	256.735	1.26525
1961	245.098	0.158337
1962	209.213	0.18908
1963	207.493	-0.00617562
1964	136.36	1.33348
1965	235.662	-0.61445
1966	153.541	0.375799
1967	169.373	0.943355
1968	191.732	1.1729
1969	199.885	-1.0764
1970	258.494	0.390494
1971	207.79	0.885487
1972	131.803	-0.309378
1973	183.261	0.930683
1974	167.767	1.20106
1975	206.878	-0.607138
1976	224.7	0.120006
1977	124.255	0.137468
1978	207.544	0.0597024
1979	196.334	-0.599069
1980	173.918	0.93395
1981	186.605	0.470175
1982	138.107	1.32961
1983	302.587	-1.41267
1984	90.6997	1.14841
1985	156.711	0.0772126
1986	226.647	-0.129134
1987	229.587	-0.88644
1988	226.822	-0.136574
1989	202.853	-0.67219
1990	194.161	-0.145876
1991	187.752	-0.0510237
1992	91.1849	0.795592
1993	180.561	0.807225
1994	235.354	0.514237
1995	153.212	0.069256
1996	146.421	-1.30813
1997	143.127	-0.360918
[truncated: 1,089 more rows]

## Sheet: b&c&d
w/o PEG			w/ PEG
L_stall (nm)	delta_t[s]		L_stall (nm)	delta_t[s]
571.735	12.09		570.546	7.35
579.468	39.87		571.58	9.03
545.95	10.74		544.246	0.42
542.972	17.97		551.481	12.3
539.733	1.53		356.191	0.3
533.578	60.15		561.51	4.92
527.164	32.73		579.153	18.24
581.917	5.94		579.044	68.25
590.24	2.25		569.469	7.65
521.902	10.08		560.053	3.69
563.4	16.41		568.606	11.43
555.934	4.32		572.056	14.82
506.319	13.47		578.746	5.46
490.925	3.9		561.822	7.38
478.342	11.16		555.461	4.83
487.365	2.28		568.171	5.49
473.063	0.72		546.281	0.3
371.213	1.11		560.465	17.97
518.862	0.87		555.309	2.01
553.133	1.38		568.459	8.58
554.848	5.28		505.557	2.67
564.411	2.19		581.118	0.75
466.781	1.38		527.929	0.6
555.438	10.14		533.756	3.15
473.688	4.59		340.347	1.68
576.507	4.68		546.706	5.28
526.475	3.12		539.281	12.81
543.163	7.17		540.404	31.53
462.632	1.14		581.556	0.18
482.107	9.27		532.867	10.89
495.81	33.69		529.258	15.45
462.062	0.78		543.332	1.95
533.368	9.96		392.325	3.72
484.377	14.85		547.71	13.41
514.532	13.56		469.115	3.81
530.911	32.37		460.303	6.57
498.984	2.25		460.919	1.26
568.057	1.56		483.157	10.83
518.408	3.27		502.51	1.26
566.208	1.38		517.849	1.59
570.031	1.86		561.907	7.02
571.122	0.96		562.216	1.95
535.038	10.77		555.296	11.88
547.306	47.19		520.956	10.17
552.233	22.5		525.499	1.17
601.587	38.43		525.068	5.37
606.988	25.23		537.515	9.84
614.081	17.52		544.473	4.38
593.457	0.45		557.53	3.21
553.888	5.13		548.595	9.99
586.015	23.25		535.697	0.39
474.774	6.15		556.263	14.16
524.027	6.24		553.536	1.74
562.096	15.48		561.832	8.37
533.684	3.27		557.469	6.84
529.221	2.76		577.589	1.71
538.862	5.94		583.777	4.47
487.475	0.51		603.654	4.92
544.305	20.85		493.506	64.86
551.471	1.62		571.771	3.15
552.854	9.99		559.838	6.39
525.035	23.19		564.998	2.97
515.882	3.81		574.11	12.9
549.508	14.1		572.992	1.86
564.898	2.76		559.039	18.06
556.873	12.27		550.524	2.97
557.404	3.69		551.646	1.53
550.489	2.91		576.6	21.42
548.281	38.31		553.617	3.18
510.965	48.75		560.117	2.34
485.344	11.16		559.331	4.14
494.561	1.41		482.273	0.9
464.94	2.52		543.595	5.07
385.969	0.24		556.385	6.9
457.385	2.25		570.822	10.29
456.306	1.86		525.294	2.46
438.402	1.29		519.635	2.61
552.651	5.97		515.959	2.43
506.664	2.58		504.179	11.04
510.771	4.86		508.261	4.26
527.058	4.2		486.439	3.72
532.046	8.1		507.424	2.55
537.034	17.1		513.449	0.96
581.163	2.82		491.103	9.81
575.674	16.41		487.82	2.61
534.107	1.26		482.82	5.52
			532.416	0.63
			492.597	5.85
			494.921	9.93
			506.527	5.91
			481.758	1.65
			441.505	1.47
			459.667	3.84
			540.68	0.84
			558.472	4.35
			561.855	1.23
			483.014	1.14
			517.943	0.51
			559.788	5.4
			558.012	24.48
			545.883	0.48
			562.825	4.71
			549.772	0.45
			576.667	0.3
			328.96	0.33
