# Supplementary material for: Stall force measurement of the kinesin-3 motor KIF1A using a programmable DNA origami nanospring
Source: eLife. 2026 Mar 25;14:RP108477. doi: 10.7554/eLife.108477 (PMC13016605; doi:10.7554/eLife.108477)
Supplement: Figure 4—source data 1. [file elife-108477-fig4-data1.xlsx]

## Sheet: time course
time course data
33 fps	P305L/P305L			P305L/WT			V8M/V8M			V8M/WT			A255V/A255V			A255V/WT
frame	nanospring length before correction (nm)	theta (rad)		nanospring length before correction (nm)	theta (rad)		nanospring length before correction (nm)	theta (rad)		nanospring length before correction (nm)	theta (rad)		nanospring length before correction (nm)	theta (rad)		nanospring length before correction (nm)	theta (rad)
1	211.34	-0.147827		221.684	-0.430924		334.138	0.841956		288.375	0.568383		304.236	0.209446		346.677	-0.84961
2	271.298	-1.48846		322.642	0.0797123		300.997	0.433673		377.706	0.387819		303.829	0.883742		411.349	-0.669706
3	304.28	0.0924992		367.967	1.14951		278.653	-0.38677		533.719	1.54063		120.404	0.0476327		234.336	-1.09272
4	322.71	0.38851		254.706	0.269555		275.771	-0.780361		260.465	-0.466598		250.119	0.321063		254.807	-1.2539
5	325.113	-0.0684341		328.158	-0.141709		296.233	-1.02583		300.005	1.15597		334.979	0.156224		588.693	1.286
6	332.71	-0.746073		288.417	-0.135183		262.838	-0.688615		361.847	-0.513872		254.615	-0.00816567		475.043	1.05798
7	263.065	-1.38572		244.037	0.593844		365.088	0.221172		300.218	-0.593476		306.703	0.360615		248.831	0.701938
8	343.389	-0.283359		249.943	0.00581874		468.058	1.00655		216.082	-0.386		192.239	0.754856		451.496	-0.946534
9	356.007	0.0253722		272.189	1.14865		314.166	0.850447		298.412	1.09009		312.911	-0.850971		394.631	-0.198362
10	206.532	0.145167		397.352	-0.482144		347.85	1.14424		249.17	-0.860216		321.816	0.793374		272.603	0.729707
11	198.954	-1.40671		395.696	-0.891811		260.697	-0.87666		299.639	-1.0201		220.268	1.54946		328.327	-1.33897
12	362.595	-0.417319		249.717	1.41644		211.069	-1.48276		313.254	0.753848		295.652	0.865962		242.154	-1.15748
13	223.703	-0.230795		368.913	1.47026		223.645	-0.524255		326.953	0.795769		224.509	0.93714		452.402	1.35661
14	174.964	-0.28243		147.802	-0.73067		362.48	-0.541297		173.011	0.965608		205.496	-1.2551		371.626	1.28687
15	322.332	-0.713573		305.026	-0.726366		421.197	-0.638646		339.965	0.478023		256.428	0.44297		470.765	-0.713901
16	330.888	-0.856612		263.936	0.711824		405.885	-1.30221		355.925	0.180738		257.018	-1.4032		288.891	0.763375
17	320.63	-1.25545		325.384	-1.18337		425.177	-0.339526		332.267	0.822442		291.134	0.753391		326.929	0.710277
18	351.411	-0.0503941		354.061	1.27303		344.895	-1.06982		326.056	1.37922		208.48	1.05119		206.112	-1.21242
19	317.634	-0.262537		415.637	0.642006		295.446	-0.866806		416.633	-1.31659		267.168	0.201962		294.732	-1.35589
20	294.681	-0.0422692		453.551	0.593407		280.701	0.234777		377.989	-1.34063		202.279	0.302196		376.901	-0.507105
21	279.6	-1.03059		354.613	0.319725		268.425	-0.355188		227.51	1.00275		208.884	0.645348		328.406	-0.404109
22	288.303	-0.0389305		301.707	0.856611		248.535	-0.130921		254.963	0.538759		228.069	0.666274		223.93	-0.0291056
23	131.129	-1.20752		209.616	0.954669		254.321	-0.350017		287.854	1.00703		313.768	0.47674		294.031	-0.428795
24	251.851	0.464875		218.1	0.336484		203.31	1.48001		317.929	-0.0288939		261.712	0.526765		347.602	-0.673447
25	193.377	0.461176		295.061	-0.311155		236.775	1.22201		334.194	0.674152		195.158	-1.45746		335.316	-0.909157
26	220.926	0.133666		209.347	0.120929		244.176	-0.907509		189.932	0.743203		185.269	0.98695		406.157	0.372899
27	207.331	0.794172		371.489	0.844422		339.112	-0.920366		354.994	1.14221		219.11	-1.23096		443.811	0.94088
28	314.147	0.563061		279.265	-0.351929		317.672	0.814185		413.418	0.489222		339.52	0.743608		416.326	0.87743
29	350.659	-0.92791		334.662	-0.0775563		262.795	0.45314		237.038	1.10271		214.825	1.19787		342.588	0.872106
30	123.114	-0.834167		355.368	-0.0736393		397.361	-0.375374		312.502	0.641422		294.966	0.165296		331.626	1.21948
31	341.288	-0.44257		318.174	1.42093		220.653	-1.57055		383.741	-0.0744335		281.174	0.0699458		366.639	1.30541
32	329.861	0.756922		268.908	0.514926		269.099	1.38822		243.669	0.948958		350.061	0.349539		358.303	1.20612
33	153.807	0.997031		199.388	0.585841		305.214	-0.327654		364.286	-1.5708		198.971	0.650262		397.157	1.36418
34	247.693	1.48708		207.868	0.188679		242.148	0.346109		204.531	-0.664164		246.968	0.788393		312.687	1.31922
35	337.303	-0.121873		371.47	-0.168931		135.474	-0.75282		293.63	-1.21279		148.258	1.47856		304.952	-1.3547
36	238.713	-1.49894		305.852	0.0152652		286.433	-1.14718		324.13	0.275869		246.214	1.5708		368.228	-1.44483
37	303.887	1.52152		315.741	0.42887		323.309	0.765654		303.022	-1.50543		236.274	0.228331		329.869	1.51155
38	384.384	-0.870251		339.4	1.04309		271.701	-0.588573		432.957	1.05223		255.294	0.782616		279.493	1.33684
39	323.429	-0.150603		249.91	0.0485978		264.457	-0.0549076		290.74	-1.2985		240.207	1.12064		269.261	-1.15365
40	159.228	-0.729651		370.128	0.983193		279.424	-0.665476		311.536	-1.20176		278.899	0.317127		366.578	-1.4214
41	313.479	-0.42369		370.726	0.539055		309.808	-0.996154		207.982	-1.22926		264.832	0.083769		383.8	-1.47112
42	293.499	-0.131213		232.168	0.848736		330.572	0.0596869		362.341	1.3496		268.845	0.561343		297.294	-1.45941
43	326.019	-0.284666		400.965	0.529155		82.5531	-1.00071		364.04	0.503594		220.596	-1.10519		309.769	-1.15214
44	308.634	-1.34971		174.52	-0.233657		207.276	0.180822		352.977	0.297922		162.837	-0.0488926		333.633	-1.11046
45	226.106	-1.00462		233.131	1.27067		245.861	-0.59686		238.578	0.57873		294.146	0.316082		345.017	-1.09308
46	244.219	0.616819		364.733	1.22028		134.145	0.219063		346.494	0.201189		173.157	0.253702		353.733	-1.17807
47	125.455	0.719812		384.889	0.106158		207.253	0.696563		338.502	-1.43313		150.951	-1.48314		383.408	-1.07469
48	286.037	0.510555		275.473	-0.546759		199.81	1.09423		193.181	1.50029		297.05	0.267623		408.696	-1.17007
49	289.473	-0.253145		203.413	0.266099		371.847	-1.31314		276.041	0.282037		194.341	-0.468341		402.876	-1.17945
50	326.937	-0.977788		327.326	0.54023		278.167	-0.0594503		186.79	0.254229		176.03	0.578881		359.529	-1.26443
51	260.07	-0.950104		418.051	0.220439		276.423	0.978331		260.639	-0.737308		268.239	0.279876		431.419	-1.14296
52	257.714	1.05444		401.217	0.711471		216.128	-1.12767		312.587	-0.924811		262.202	0.935361		156.955	1.5105
53	340.146	0.594429		334.262	-1.52857		470.25	-1.08148		313.068	1.16232		264.856	0.876079		362.091	0.213541
54	241.681	0.407684		301.336	0.0586735		239.684	-0.448922		293.093	1.40859		206.632	0.659772		316.556	0.540918
55	180.984	-0.190185		351.491	0.716613		334.967	-1.12245		251.524	-0.043212		251.868	0.732162		302.042	1.49883
56	93.5266	-0.933807		328.015	-0.182949		269.883	-0.772965		337.235	0.0948559		303.146	-0.349567		298.904	-0.710593
57	383.348	0.693433		274.795	0.919564		246.516	-0.261448		331.317	0.668696		18.7089	0.315527		195.504	-1.53986
58	176.389	0.542698		165.434	0.220518		331.579	-0.0193749		195.493	1.16375		199.735	0.591713		266.195	-0.116352
59	156.346	0.0695902		154.557	-0.128083		247.287	-0.0225618		315.739	-0.977346		263.929	-0.0658545		291.885	0.74975
60	209.167	1.10182		350.688	0.669193		257.274	0.235529		351.621	0.855624		117.703	0.858087		252.512	1.28131
61	329.117	0.695937		352.173	-0.760309		120.256	-0.237734		363.012	0.758032		222.61	0.766007		515.071	-0.0267344
62	254.971	-1.41994		268.494	1.32898		192.151	0.377447		331.076	1.06864		192.615	-0.406276		382.468	-0.823592
63	338.774	-0.623257		393.963	0.886654		283.455	-0.215145		352.81	1.03191		206.368	0.486915		256.168	0.982764
64	143.474	0.13392		319.965	1.26502		248.531	-0.13778		378.452	0.684409		257.422	-0.0266991		248.484	-1.0825
65	341.205	-0.305994		264.001	1.00197		186.164	0.227261		391.697	0.791728		311.859	0.130363		210.07	0.90845
66	205.54	0.174633		347.567	0.987051		182.521	-0.092438		336.961	-0.319122		238.607	0.0582667		406.289	-1.25818
67	205.294	0.890993		175.596	-0.452136		171.468	-0.851945		387.556	0.44979		282.733	-0.353878		308.427	-1.26354
68	356.119	-1.30105		244.137	-0.0250397		163.142	-0.483039		267.303	1.19831		339.253	0.737541		393.078	-1.35433
69	257.666	1.16244		234.306	0.503288		167.269	0.494727		409.774	0.426604		278.68	0.969982		264.045	0.23458
70	199.66	0.699681		238.7	1.21408		141.524	0.532691		207.749	-1.52745		205.142	-0.290447		433.455	0.0220094
71	121.407	1.05171		436.01	-0.720409		142.569	-1.05914		388.531	0.59199		358.094	0.569279		431.034	0.0822043
72	392.667	0.445894		393.145	0.624605		130.465	0.079807		256.568	-0.365698		153.511	1.07049		425.538	-0.0307974
73	233.342	-0.0482485		315.579	1.10247		207.144	-0.237274		268.672	0.146425		364.221	1.12197		411.234	-0.0388256
74	316.318	0.510911		290.585	-0.0956061		149.388	-0.0426943		326.965	0.856964		160.978	0.498724		454.876	0.0537217
75	261.979	-0.0440288		178.748	-0.564834		132.064	-0.560659		241.256	0.450215		176.828	0.268575		544.111	0.0810697
76	140.172	0.654916		139.86	-1.48649		248.462	-0.184072		96.5789	0.965574		170.987	1.16558		514.228	0.0328607
77	328.901	0.32239		280.229	0.502585		180.506	-0.0255192		272.211	0.768631		238.889	-0.237842		488.726	0.122322
78	231.351	-1.07929		298.939	-1.42255		156.875	-0.581534		362.402	1.34305		179.828	0.136401		513.344	0.0224183
79	268.029	-0.412691		418.114	1.08478		188.785	0.124839		448.959	0.960642		268.342	1.03213		504.739	0.0106123
80	292.125	-0.471694		313.946	0.824241		223.762	-0.0425501		287.496	0.76693		184.602	0.612093		468.703	0.0244117
81	256.729	-0.718821		459.732	1.20503		195.394	0.205484		380.821	0.634223		325.533	0.501551		434.213	-0.0844123
82	278.732	-1.48533		453.815	1.1068		285.729	0.0213415		443.392	0.612217		262.596	0.378207		438.568	-0.0168101
83	251.462	-0.0198211		460.735	1.14662		285.327	-0.239954		132.326	-1.22533		204.678	-1.2009		532.081	0.0208558
84	274.308	0.208007		480.358	1.01677		305.897	-0.12647		304.094	1.24895		224.216	0.0365046		481.046	0.0585065
85	280.559	-0.514446		454.734	1.2019		336.427	-0.262648		420.008	0.777533		310.262	0.436793		467.687	0.02409
86	319.389	0.201812		400.979	1.05672		233.448	-0.184818		298.197	-0.985639		269.676	-1.36239		455.924	0.105271
87	332.745	1.02165		441.262	1.18525		200.716	-0.351473		326.66	1.01725		372.238	1.22471		413.622	0.117435
88	231.045	0.512132		455.461	1.16257		235.316	-0.307196		194.881	0.547023		281.544	1.11469		497.796	0.0663189
89	340.079	-0.0027513		411.757	1.14822		317.826	-0.296319		478.083	0.503284		228.542	1.23562		492.576	0.0605604
90	390.442	0.186979		476.776	1.13286		245.463	-0.183781		302.968	0.633045		215.715	0.872021		470.005	0.0444976
91	398.979	-1.53032		477.277	1.09716		221.368	-0.0266571		350.98	0.249834		333.948	-0.686		464.985	0.0768252
92	380.909	-1.15758		467.729	1.09699		229.274	0.198055		255.858	0.82063		168.161	0.0794139		484.841	-0.0159637
93	326.133	-0.381063		455.442	1.13927		272.316	-0.0603548		323.023	0.254327		232.341	0.63604		526.946	0.0851052
94	383.467	-0.655003		435.797	1.05684		222.43	-0.22892		297.826	-0.0303384		186.323	0.546552		460.877	0.0614941
95	249.109	-0.54705		481.409	1.10744		331.598	-0.257077		342.971	0.170419		307.728	0.383793		478.731	0.0206619
96	217.604	-0.232119		470.091	1.03157		236.383	-0.128151		181.04	-0.173036		218.879	0.236043		484.492	0.0817482
97	328.413	0.614936		483.201	1.20442		240.831	-0.226525		274.842	1.19379		300.195	0.55407		447.501	0.0293748
98	345.221	0.326238		458.707	1.22026		183.878	-0.681984		204.903	-1.20964		200.775	1.42151		422.505	-0.0268754
99	257.157	-0.94404		386.897	1.07521		314.874	0.0863988		363.657	1.18067		272.826	0.676766		427.998	0.106526
100	311.818	-0.927875		284.692	-0.944589		281.833	-0.547155		326.086	0.977169		186.343	0.810808		490.999	0.0144004
101	336.646	-1.25354		307.32	-0.595953		373.457	-0.357239		282.252	-1.38448		250.295	0.257963		498.688	0.0106645
102	139.296	-1.37588		350.615	-0.250647		369.389	-0.094977		330.428	0.298501		367.398	0.638753		496.83	0.0376049
103	326.609	0.311563		410.364	-0.444535		369.345	-0.0818159		366.91	1.47625		236.927	0.571449		510.422	0.0367421
104	212.588	-1.36759		332.509	-0.469189		416.017	-0.0193182		322.895	1.48559		275.228	0.710511		473.598	-0.0186567
105	124.116	0.993207		302.661	0.854384		439.176	-0.0538834		444.596	-0.832883		141.531	0.151832		486.994	0.073111
106	259.168	0.0474616		372.674	0.0174109		341.728	-0.19101		537.612	0.419615		195.156	0.683246		474.391	-0.0357496
107	282.171	-0.541075		305.39	0.722927		476.787	-0.0720642		183.23	0.344737		292.185	0.642016		495.456	0.0179853
108	131.135	-0.115613		284.71	0.420974		457.508	-0.118395		474.346	0.28817		138.532	-0.183202		493.198	-0.00596978
109	348.278	-1.31708		300.896	-0.934684		455.053	-0.0897067		182.005	-0.211948		159.901	1.06003		429.544	0.0791601
110	355.679	1.42718		204.984	-0.646359		455.011	-0.116537		417.045	0.637072		210.782	0.797153		446.986	-0.0118668
111	277.583	-0.280782		197.97	0.142499		514.543	-0.161156		373.258	0.278967		190.452	0.395581		493.261	0.0417493
112	149.884	-0.848125		303.155	1.54736		480.772	-0.124134		366.95	0.548474		255.377	1.17734		473.325	-0.0149089
113	266.899	-0.308724		423.047	0.388629		531.232	-0.18273		303.661	0.947181		219.06	0.833235		425.963	-0.014424
114	309.414	-0.273442		293.557	1.00057		486.333	-0.185538		310.944	0.700963		201.363	0.508191		430.893	0.0135393
115	473.867	-1.00905		325.612	-0.818673		490.047	-0.147725		307.798	1.24052		181.784	0.492366		445.187	0.0519058
116	268.28	-0.39103		380.567	0.530996		538.559	-0.227698		291.285	1.02095		160.104	-1.43299		460.31	0.0151739
117	353.787	0.573088		188.563	-0.712371		470.486	-0.164325		478.91	1.14063		332.764	1.37759		481.718	0.0902354
118	302.195	1.11521		325.55	0.038936		437.95	-0.232294		392.965	0.882533		255.219	0.0970524		474.765	0.126558
119	182.331	-0.345317		376.815	-0.360375		449.021	-0.149638		242.139	1.06798		240.336	-0.414141		530.542	0.139853
120	223.318	-0.309132		260.275	-0.608408		475.859	-0.0932211		383.125	1.25078		208.114	-1.28834		537.805	-0.0183488
121	263.703	-1.3603		294.418	0.458769		444.588	-0.142915		457.613	0.228039		274.024	0.0632508		485.581	0.0665384
122	304.148	-1.49199		250.685	-0.446204		451.447	-0.0520426		374.35	0.331539		195.515	-0.00574753		460.846	0.0292309
123	255.944	-0.216841		302.588	1.42927		447.048	-0.154541		298.861	1.06424		154.477	-0.243906		462.769	-0.0193575
124	128.585	-1.42619		241.354	-0.480272		456.167	-0.163336		305.087	1.3847		178.926	-1.37904		507.345	0.109778
125	192.867	-0.969066		296.103	0.359948		469.261	-0.209545		397.962	0.555446		300.979	0.532127		364.294	-0.390579
126	280.956	-0.642676		93.2598	-1.05101		478.816	-0.133538		490.612	1.07566		317.068	1.17573		351.381	0.136931
127	239.545	-0.372405		316.628	-0.264795		541.432	-0.169062		350.649	0.813951		372.421	0.131752		348.387	-0.468584
128	227.9	-0.112264		323.95	1.15116		543.571	-0.0701637		266.269	0.417468		274.821	-0.38392		375.275	-1.16119
129	250.956	-0.84962		139.516	0.481861		501.444	-0.187254		245.724	0.449113		337.885	0.133777		312.562	0.260754
130	214.623	-0.570427		242.223	1.14227		493.046	-0.169214		215.083	-0.795958		241.009	0.504723		193.714	-0.47844
131	275.207	-0.473129		274.446	0.225042		495.573	-0.150116		249.542	0.717539		360.557	0.123154		277.524	-0.768791
132	306.197	-0.298594		186.495	0.110936		506.289	-0.222753		175.012	-0.715754		210.355	-0.132281		338.029	0.524988
133	225.663	-0.15217		378.658	0.549677		502.558	-0.0950881		292.162	-0.464065		326.812	-0.2717		224.654	-0.831087
134	177.758	-0.942691		221.551	0.840195		538.465	-0.211806		373.782	0.317924		247.507	-0.635133		305.753	-0.0903502
135	304.287	-0.746073		292.775	-1.43983		502.065	-0.183275		195.364	1.07688		197.469	0.687312		155.945	-0.755195
136	167.01	-0.210768		409.127	-1.02876		572.441	-0.172034		184.668	0.894219		261.473	0.684835		134.064	0.926694
137	180.004	0.499027		360.205	1.31529		522.075	-0.126386		387.17	1.2611		284.18	0.135859		373.722	0.900144
138	305.033	-1.12452		275.874	-0.364182		503.683	-0.183659		354.437	1.29994		280.083	1.30881		319.626	1.34219
139	197.567	-0.961371		268.399	-0.553684		505.58	-0.200252		305.697	0.896601		302.709	0.251698		228.687	-0.248029
140	351.151	0.276885		371.075	0.882781		468.557	-0.196093		360.857	0.737871		311.615	0.425558		296.575	-0.224315
141	191.134	-0.204602		193.128	0.915194		483.585	-0.0479401		220.853	-0.737492		252.55	0.573766		395.136	-0.888875
142	371.616	-0.573674		241.921	1.20871		535.056	-0.13882		184.088	0.280253		289.011	0.434268		402.432	-0.734288
143	189.499	0.514052		395.39	1.32753		544.865	-0.215371		286.751	1.37347		353.465	0.693618		303.876	-0.31156
144	217.693	-0.222707		277.805	1.34256		504.684	-0.169882		360.283	-0.700244		255.227	1.01793		316.213	-0.970757
145	257.381	0.94786		273.242	0.791622		486.164	-0.247409		423.418	0.366407		211.161	0.348359		219.341	-0.267775
146	364.706	-0.631995		277.727	-0.0148511		514.848	-0.149464		301.79	0.656941		278.165	1.30364		335.989	0.55112
147	176.846	0.141169		263.063	1.49492		478.289	-0.158116		319.093	1.20775		141.521	-1.45552		253.998	0.500905
148	155.16	0.467139		252.75	-0.818836		487.268	-0.243995		485.033	0.677368		183.699	0.783446		411.599	0.193565
149	253.166	-0.53168		422.707	-0.194342		541.899	-0.153899		296.399	0.950939		296.864	0.786247		467.334	-0.856586
150	342.847	-0.586946		369.876	-0.56109		503.598	-0.206332		278.22	0.534177		386.493	0.401409		256.225	0.58936
151	280.607	-0.851185		153.205	0.0774562		541.729	-0.136709		191.386	1.278		408.252	0.046877		261.245	-0.47465
152	199.303	-0.280101		267.796	0.68909		526.288	-0.13808		288.008	1.01446		430.851	-0.0281311		242.923	0.592181
153	299.587	0.0971375		287.869	-1.06571		532.933	-0.110537		287.145	0.252292		375.278	-0.209983		334.315	-1.52528
154	264.544	0.0522504		300.587	-1.16767		508.709	-0.0890168		382.788	1.41208		424.963	-0.235711		309.7	0.395971
155	279.618	0.059743		93.0238	-0.331035		505.788	-0.117941		253.576	0.941104		474.567	-0.108364		305.743	-0.319649
156	300.152	-1.41031		176.842	-0.505783		486.623	-0.124356		322.599	1.31303		514.549	-0.0382881		253.746	-0.313974
157	230.279	0.525124		246.802	-1.05605		497.03	-0.147993		399.684	0.27848		443.431	-0.123867		451.302	-0.790944
158	271.665	-1.04265		261.967	0.712239		501.825	-0.199409		386.011	0.594931		478.194	-0.110122		359.136	-1.13856
159	150.813	0.15852		263.453	-1.27036		498.365	-0.101641		308.63	-0.878321		548.636	-0.0821442		278.441	-0.564297
160	178.322	1.36201		339.406	-0.746513		544.568	-0.144579		308.212	1.36747		487.802	-0.130305		259.721	-0.614868
161	219.545	0.908679		359.349	-0.849249		472.214	-0.120487		402.204	0.939525		527.249	-0.0869072		59.2354	1.35958
162	249.236	-1.12332		199.621	0.131164		477.232	-0.188884		365.127	0.897558		522.427	-0.0202354		206.98	-0.0779881
163	387.843	0.15754		327.884	-0.461087		476.205	-0.154283		132.978	0.860946		502.379	-0.027398		199.582	-1.40812
164	207.122	-0.626641		240.484	0.915027		494.339	-0.239148		379.028	0.853483		583.807	-0.164191		475.056	0.224627
165	281.379	-0.952046		361.685	1.23501		564.602	-0.194076		465.39	0.991021		563.031	-0.0756924		338.989	1.25824
166	245.324	-0.361921		297.334	-1.3967		521.881	-0.212663		397.686	-1.1702		554.324	-0.137027		325.069	0.895534
167	347.762	-0.511454		302.06	-0.834044		485	-0.264229		359.07	1.14902		545.677	-0.124312		258.067	-0.286198
168	313.94	-1.19739		426.545	1.11169		493.516	-0.171757		382.949	1.36011		609.002	-0.0822438		323.812	0.699297
169	110.88	-0.745443		317.433	-0.898291		535.742	-0.140904		451.727	-1.53215		305.287	-0.191314		330.713	0.615163
170	220.399	-0.117994		332.713	0.361321		486.702	-0.156112		411.709	1.35351		313.846	0.832529		274.955	-0.27096
171	251.206	-0.315313		279.77	0.446407		497.337	-0.222876		211.466	0.909101		386.34	0.298302		281.103	-0.476185
172	198.99	0.242593		302.094	-0.0932762		494.511	-0.270051		322.426	1.27751		250.853	-1.25219		320.294	-0.066577
173	236.945	1.04442		238.916	-0.268118		510.724	-0.200676		282.573	1.21496		169.66	-0.98602		397.083	-0.404092
174	256.848	0.0463253		244.922	0.62606		464.745	-0.0769254		507.125	0.989243		348.175	0.609151		273.176	-0.0821853
175	158.499	0.422514		241.403	1.02447		481.468	-0.147972		370.694	0.278641		366.892	0.234262		341.93	1.21201
176	232.83	-1.18088		164.115	-1.53569		543.028	-0.106405		166.019	-0.602606		207.253	-0.960285		324.506	-0.180455
177	232.297	1.30623		242.048	1.38918		550.293	-0.135115		94.2053	-0.800163		137.589	1.39328		315.576	-0.792046
178	281.852	-0.303461		446.826	-0.562797		526.919	-0.134473		211.997	0.00227193		220.517	0.109236		307.904	-0.656836
179	236.553	-0.457835		245.678	-0.58551		541.936	-0.158554		400.668	-0.518022		277.021	-0.159562		263.044	-1.33134
180	311.419	-1.01797		306.636	-0.0375217		511.329	-0.114022		371.246	-1.35483		273.531	0.130708		416.89	1.32529
181	266.895	0.166452		248.734	0.137066		543.885	-0.0996593		424.721	1.29422		352.658	-0.145534		326.992	-1.20999
182	286.916	0.577588		295.765	-1.21599		496.073	-0.163984		364.257	0.599855		362.353	-0.0546499		249.954	-0.745275
183	238.748	-0.303492		289.437	0.666047		504.849	-0.119806		378.43	0.812341		399.776	-0.204728		418.677	0.261193
184	247.602	-1.02505		301.118	0.400979		459.096	-0.151004		329.87	1.38113		380.091	-0.0757313		248.938	0.587156
185	291.202	-0.910016		412.396	-0.493876		485.056	-0.197937		207.305	0.797555		338.274	-0.183423		272.681	-0.398597
186	337.556	-0.294124		163.027	-1.03281		485.267	-0.182671		135.933	-0.698603		409.234	-0.212276		233.722	-0.992861
187	293.54	-0.601561		291.05	-0.729216		467.315	-0.170337		512.401	1.25403		489.817	-0.185034		337.775	-0.222422
188	272.596	1.49975		125.483	-0.167178		473.311	-0.126644		312.738	1.36992		451.318	-0.27534		237.658	-0.909983
189	159.942	1.42695		362.697	-0.637987		517.696	-0.17169		419.324	0.962317		466.631	-0.0728638		284.583	-0.273195
190	470.096	-0.233199		245.074	-0.595536		497.19	-0.210248		370.463	1.2668		430.192	0.042592		307.944	-0.186105
191	274.507	-0.377621		141.206	1.4918		505.143	-0.122493		233.696	1.20299		401.179	-0.048499		441.279	1.39223
192	172.42	-0.10232		258.857	-1.53992		529.441	-0.254405		294.486	0.164258		411.804	-0.106716		159.155	-1.18325
193	94.9413	-0.0628047		475.955	-1.5708		497.153	-0.19458		159.828	0.684314		421.323	-0.184295		287.201	0.532428
194	223.838	-0.336973		304.288	-0.0819068		502.646	-0.162572		152.797	-0.407566		432.528	-0.0782527		307.25	0.316018
195	118.347	-0.332443		395.234	1.49688		543.24	-0.247822		187.708	0.976546		425.432	-0.0811104		513.991	0.448569
196	109.366	-1.08439		287.916	-0.488694		565.877	-0.188672		327.532	1.36941		439.161	0.00808696		337.903	0.384707
197	224.935	0.219645		329.676	-0.0177776		523.975	-0.252668		153.067	0.0206696		379.209	-0.0305878		354.095	-0.563311
198	164.884	-0.815942		300.14	-0.115854		507.152	-0.211881		180.214	1.17549		414.127	-0.0187008		434.217	-0.916466
199	136.149	-1.30681		190.046	-0.654203		485.341	-0.151299		198.778	1.23622		483.435	0.0637936		320.03	-0.912723
200	246.382	-0.247416		423.604	-1.38337		496.377	-0.136197		293.424	-1.37526		425.185	-0.130409		406.987	-1.48221
201	242.45	-0.248139		266.158	-0.473099		547.501	-0.163739		286.531	0.974447		466.594	-0.052571		423.339	1.03453
202	377.843	-0.353517		404.589	-0.47793		491.66	-0.125678		320.585	1.26987		448.278	-0.0537689		310.284	0.245403
203	329.803	-0.773669		333.985	1.20796		484.688	-0.165004		244.327	1.19023		489.368	-0.135303		159.426	-0.22041
204	322.747	-0.191873		222.211	-1.52671		311.971	-0.806116		190.716	0.735239		432.538	0.0300954		320.564	-1.50179
205	385.407	-0.615701		369.752	1.10507		244.506	-1.0759		382.143	0.839607		401.327	-0.280797		142.237	-0.49918
206	187.709	-0.0482486		324.834	0.958215		231.594	-0.56696		167.677	-1.53879		455.526	-0.140784		359.518	1.28864
207	354.962	-0.300918		181.927	1.16412		461.818	-1.0803		313.262	0.603052		493.613	-0.0470435		180.615	0.99637
208	215.458	0.473441		194.863	-0.644701		289.315	-0.518125		266.117	0.416702		487.834	-0.15849		299.413	-0.148629
209	307.691	0.708047		282.028	-0.0695374		153.633	0.122283		363.173	0.151939		504.011	-0.177472		374.648	0.201062
210	211.77	0.00841697		320.489	0.951798		278.433	-1.06846		258.491	-0.642215		519.008	-0.12265		424.703	-1.54668
211	261.707	-1.37182		433.41	1.38837		340.687	-0.588793		299.003	-1.39732		383.197	-0.207449		294.221	0.845558
212	230.828	-0.451814		130.477	0.141732		287.118	-1.13823		288.681	0.414224		209.896	-1.22544		366.249	0.840913
213	442.921	-0.21478		344.529	0.0522469		238.167	0.366467		308.85	0.724767		402.312	0.581871		285.415	1.42692
214	380.735	-0.666763		306.133	0.588184		243.446	-0.094113		330.935	1.31076		242.655	-1.41056		263.42	-0.865419
215	308.22	0.326867		381.838	0.466979		262.895	-1.20502		175.479	1.00998		252.234	-1.25579		353.188	1.39366
216	378.572	0.895537		407.148	1.25176		255.998	-0.423294		278.108	0.732728		232.793	0.787576		290.647	1.12137
217	326.204	0.628309		402.856	1.2171		207.25	-1.10098		415.046	0.932258		304.716	1.12204		307.636	0.985459
218	189.725	1.11112		441.335	1.1485		164.023	-0.559283		243.102	0.46351		300.583	0.736422		448.062	0.00863103
219	194.686	0.135313		442.231	1.21774		216.676	-0.715335		377.663	0.743278		178.093	-0.233801		324.417	-0.267652
220	291.572	0.218807		385.775	1.20597		291.975	-0.0905909		437.277	0.276115		197.702	-0.976342		245.194	-0.422225
221	187.496	-1.52108		378.242	1.17998		191.534	1.20177		286.967	0.486251		371.659	0.135044		297.768	0.238058
222	286.037	-1.3885		420.275	1.18436		475.527	1.44463		331.135	1.31748		252.25	0.777792		473.92	0.155043
223	285.123	-0.102669		412.093	1.27771		361.687	1.5029		241.304	1.32194		294.925	1.30765		375.893	0.832886
224	246.716	-0.0682117		408.388	1.07356		425.872	-1.32648		320.604	0.161514		225.504	-1.19058		329.064	-1.13361
225	286.501	0.793249		342.162	1.15685		441.533	-1.36214		327.847	0.385934		411.117	0.502672		194.617	1.33594
226	265.375	0.292057		414.765	1.08136		208.783	1.38176		101.592	0.990793		280.358	1.02037		256.935	1.03354
227	345.732	0.890258		374.429	1.07531		58.2562	0.170855		143.479	1.17356		250.581	0.315736		306.944	0.465112
228	313.694	-1.49112		411.167	1.12475		317.545	1.54241		264.903	-1.2079		151.04	0.489364		370.952	1.2102
229	249.811	-0.0311867		349.72	1.3283		427.427	-0.731073		371.876	0.671891		280.184	0.197481		369.27	-0.751385
230	215.953	1.36654		417.162	1.13411		391.493	-1.29311		246.232	1.13661		305.101	0.404421		325.31	-1.1157
231	288.612	-0.801298		354.31	1.1643		250.065	-0.959333		287.534	0.676417		287.796	1.41069		291.807	-0.729873
232	350.886	-0.635985		364.455	1.39257		218.7	-1.08473		401.263	0.94189		331.226	0.417508		195.43	-0.0210801
233	323.604	-1.33316		397.466	1.16713		414.677	-0.454674		350.747	1.08788		201.801	-1.56187		512.988	-0.63886
234	239.029	-0.69953		388.897	1.21408		185.59	-0.387434		380.915	-1.17857		248.446	-0.567063		227.261	0.983096
235	282.093	-1.03281		179.21	1.48759		268.028	1.2545		358.526	0.926153		272.945	0.242012		382.275	-0.970078
236	232.706	-1.52942		304.964	-0.688215		297.494	1.1414		309.104	1.23349		278.16	0.582982		448.224	-1.35429
237	233.976	-1.32178		291.047	0.843638		344.731	0.924139		259.013	1.52601		177.049	0.977438		318.528	-0.830012
238	180.682	0.878322		404.183	0.593286		262.465	1.09456		208.414	0.594767		203.648	-1.05062		556.485	-0.789067
239	200.213	0.430876		405.977	0.987863		267.821	-1.09078		311.748	1.16073		229.643	0.0296494		289.442	-1.23477
240	314.122	0.428735		425.468	1.12086		258.083	-1.37977		330.573	-1.44837		342.588	0.47414		277.836	-0.16161
241	238.888	0.627283		392.7	1.0591		268.059	-0.637425		302.852	1.453		247.601	0.791921		331.478	-0.790617
242	323.08	-1.49492		412.994	1.08775		221.745	1.09169		244.038	1.31562		210.72	-0.73435		314.724	1.42819
243	367.642	1.09458		399.927	1.12613		101.651	0.749615		346.861	0.216536		221.597	1.01349		478.949	-0.729074
244	342.823	0.0189584		349.461	1.16255		108.815	-0.0402785		320.754	0.740487		342.626	0.38717		125.123	1.14791
245	226.676	-0.82363		435.855	1.07903		193.303	0.571184		238.955	1.25827		208.743	1.17434		155.01	0.8712
246	295.027	0.56402		448.741	1.19846		303.384	-0.0987892		228.775	0.883172		327.848	0.420558		291.016	-0.364157
247	305.507	-0.375435		403.673	1.15352		339.493	-0.82572		314.925	1.07573		258.159	-0.399401		220.409	0.706226
248	343.293	-0.258607		389.405	1.22324		163.409	-0.735041		339.403	1.32958		121.133	0.594998		345.465	0.500387
249	301.043	-0.395093		433.544	1.09152		250.395	-0.960167		527.842	-1.19663		345.816	-0.987903		236.024	0.65028
250	303.511	-0.951425		456.914	1.30298		224.644	-0.526791		435.631	1.5708		199.298	0.124914		296.786	0.745547
251	361.368	1.50258		448.949	1.12354		331.851	0.406303		184.493	0.878613		224.494	-0.213		243.053	-1.30889
252	258.719	-1.52689		478.372	1.23299		321.164	0.377066		379.188	-0.124252		235.906	0.0663629		256.979	-0.984711
253	375.833	-0.782106		430.16	1.13256		192.966	0.701122		282.081	-0.958419		289.353	0.905961		570.222	-0.582805
254	182.725	-0.777986		360.671	1.17638		173.644	1.22911		126.112	-0.712779		223.41	-0.22484		342.937	-0.381294
255	198.208	-0.728427		418.895	1.10038		219.774	-0.940473		249.136	0.525012		322.712	0.182753		154.962	1.57079
256	289.721	-0.795405		365.241	0.970933		371.581	0.816401		242.115	0.386298		99.0015	-1.32652		355.796	0.855263
257	351.931	-0.924511		339.696	1.11549		240.638	-1.27019		109.643	0.53254		234.437	0.364063		269.991	0.853595
258	217.661	1.10773		455.981	1.19723		394.503	-0.181663		348.267	0.243443		277.888	-0.0600336		290.052	1.3313
259	115.865	-0.847239		80.927	-0.839176		270.413	-0.994526		324.272	-0.862496		302.337	1.47271		516.129	-0.00676648
260	333.748	0.902559		388.131	-0.868129		218.89	0.508095		251.817	-1.53145		136.397	0.528541		344.177	0.466216
261	231.097	0.257267		388.191	-0.359454		329.328	-0.0781509		327.922	0.189604		232.038	0.0524537		395.385	-1.31991
262	284.727	1.0841		274.306	-0.115595		397.183	0.0892721		279.48	-0.29393		290.221	1.21027		71.1574	1.48488
263	373.336	-0.0870133		246.827	-1.25394		239.702	0.0626969		358.827	-1.4887		84.298	0.229501		360.549	-0.732827
264	155.705	0.491358		310.384	-0.798289		367.546	-0.148284		336.382	1.08937		334.821	0.308412		190.044	-1.5197
265	213.852	0.406979		275.229	-1.20626		218.769	1.24075		341.077	0.647773		225.668	0.748817		463.749	0.495847
266	331.012	0.071775		264.513	0.564992		320.073	-1.18363		213.875	-0.795896		299.517	1.19761		243.32	0.85336
267	341.459	0.364418		395.652	-0.545575		336.816	-1.07416		240.324	1.2779		219.353	0.917109		183.341	-1.54172
268	327.237	0.358937		454.621	0.846869		362.018	-0.624017		344.355	1.39749		307.73	0.997557		304.565	-1.24895
269	314.099	0.221334		290.534	0.140206		396.599	-0.706829		318.78	1.21421		333.948	0.151454		123.134	0.499319
270	323.675	0.434139		263.277	1.02995		447.852	1.10685		282.501	-0.626502		200.203	1.39001		471.131	1.26194
271	312.986	0.417696		315.373	0.042892		259.188	0.738284		226.897	-0.312746		269.811	0.420857		228.32	0.300725
272	347.677	0.237355		283.521	-0.464116		283.536	0.777883		264.816	-0.486124		353.477	0.994807		330.81	-0.161174
273	351.698	0.302174		239.963	-0.748823		344.596	-0.194761		266.517	-0.0713966		275.351	0.550158		325.343	-1.12052
274	346.599	0.149812		265.794	-0.900394		389.959	-1.49565		225.063	-1.31695		231.821	1.00281		173.345	-0.2936
275	330.523	0.384784		307.533	-0.0665186		286.711	-0.597297		234.58	0.582504		138.305	0.676082		395.07	1.10095
276	358.287	0.245767		222.699	0.00239807		310.479	0.548369		432.62	1.30693		329.377	0.435787		285.547	-0.948909
277	315.443	-0.0585863		291.576	-0.655205		281.192	1.16812		168.878	0.0057697		238.241	0.653777		380.604	1.17173
278	404.813	0.130485		320.685	-1.54324		147.018	-1.37853		247.599	1.26295		186.486	0.406897		253.291	-0.260821
279	304.598	0.351893		270.137	-1.31296		404.977	1.29539		265.001	1.40166		290.137	0.492184		328.542	-1.30531
280	378.373	0.0778162		340.869	0.456193		267.772	-0.99615		199.11	-1.41926		258.819	0.912949		314.178	0.255629
281	346.883	0.0838172		271.602	1.43462		248.616	1.16092		340.382	0.657519		164.66	0.60553		178.591	0.858258
282	359.598	0.118465		365.161	-0.0287502		252.567	-1.42452		184.552	0.980841		165.902	-0.100139		405.596	-0.533527
283	331.217	0.181403		318.795	-1.5708		428.3	-1.36087		316.311	-1.43386		273.43	1.38349		362.616	-0.45783
284	323.438	0.311855		297.379	-1.03679		407.969	-0.889673		420.888	0.0628083		237.789	0.239038		295.863	1.26116
285	372.429	0.261306		210.709	0.353565		74.7379	0.0796999		240.846	-0.0296017		163.601	1.34335		294.367	-1.02404
286	334.365	0.370475		172.973	0.844446		285.898	-0.872751		113.342	1.35331		171.986	0.715334		217.327	0.828801
287	342.009	0.0478837		339.413	-0.689915		267.274	-0.241791		131.442	-1.27142		168.56	0.736721		213.697	1.12683
288	412.701	0.0870711		345.657	0.695157		222.899	1.25492		289.342	0.391037		267.711	1.06412		450.089	0.165795
289	346.171	0.248478		320.935	-0.462589		183.452	-0.288727		353.348	0.74996		319.667	-0.0550124		481.063	-0.967645
290	291.788	0.301428		179.555	1.49171		218.194	1.39616		453.728	0.791186		143.831	-1.27274		398.139	0.709162
291	277.211	0.339679		228.104	0.653517		347.46	-0.38978		270.715	1.39124		193.387	-1.15364		139.439	0.15026
292	348.404	0.386993		323.15	-0.0751073		334.418	0.547187		326.472	0.421005		208.824	-0.751635		227.433	-0.958084
293	400.06	0.180618		295.311	0.748255		448.566	1.2251		165.787	1.31361		259.631	1.08451		256.664	0.0983762
294	306.83	0.0697853		236.551	-0.560519		248.494	0.465819		246.167	0.984915		227.708	0.15258		331.717	-0.112397
295	345.526	0.0655437		186.93	-0.461576		322.871	-0.343917		263.284	0.382988		233.327	1.00451		471.531	-1.30448
296	337.891	-0.0672893		314.197	1.22078		260.054	-0.600768		306.898	0.43028		240.426	0.930129		317.888	-1.54272
297	283.232	0.111442		357.158	0.969842		402.422	0.418143		361.676	0.325714		281.894	1.31186		82.1616	0.32656
298	346.138	-0.0817213		167.557	-0.594878		374.369	0.0287554		328.998	0.839659		175.027	-0.565188		267.792	-0.591934
299	241.738	-0.309886		356.262	0.720883		214.033	1.32296		264.586	1.23993		197.047	0.660079		250.768	-0.501222
300	335.957	-1.20305		238.762	-0.657242		468.068	1.17513		194.477	-0.463366		205.181	0.218544		329.37	0.144378
301	253.566	-0.914813		234.946	1.55539		258.936	1.56377		318.615	0.96005		172.686	0.854284		360.772	-0.34043
302	257.178	-0.278247		326.186	1.43474		290.727	-0.304216		327.848	-1.48266		250.296	0.146715		218.504	0.186235
303	264.812	1.35834		137.123	-0.210528		391.05	-0.316157		291.959	1.31055		169.102	0.440284		194.707	-0.383367
304	279.865	-1.38908		216.996	-0.429912		334.37	-1.12537		429.647	-0.923782		224.631	-0.119382		367.332	0.617096
305	207.913	-0.767462		335.425	0.646851		179.815	-1.47237		336.411	-1.02738		364.196	0.99967		196.728	-0.373478
306	201.466	-0.412467		241.811	1.21789		281.846	0.526672		356.969	-1.5708		358.542	0.795483		300.049	0.95986
307	226.883	-0.83183		383.818	-1.41579		156.613	1.5708		267.645	1.48449		420.223	1.01183		178.906	-0.023505
308	370.815	0.381246		88.4875	1.11539		178.28	-0.472912		334.686	1.07387		395.131	0.933408		221.026	-1.49349
309	340.452	0.0538883		276.944	-0.650757		559.519	-1.06376		316.465	0.547597		387.367	0.848978		547.81	-0.554313
310	361.956	0.88366		209.494	1.03272		320.11	1.09451		452.984	0.023072		450.622	0.86312		292.5	-0.572445
311	326.679	-0.130533		383.314	0.227624		202.37	-1.31516		373.179	0.754908		415.478	0.85186		314.933	1.48734
312	285.011	-0.664296		185.906	0.928553		207.473	-0.832888		279.694	1.37474		429.207	0.889721		304.423	-0.0800161
313	388.546	-0.262539		307.832	-0.910439		378.622	-0.356945		210.872	-0.849582		430.245	0.746126		418.398	0.111031
314	306.219	-0.271337		315.638	0.902721		368.664	-1.48243		403.757	1.32289		411.064	0.751051		323.946	-1.44129
315	331.358	-0.316358		197.87	0.23905		175.201	-0.618919		294.174	0.808401		470.362	0.74744		173.101	-1.48117
316	200.361	0.16281		163.131	-1.5708		402.451	0.590494		235.946	0.821968		480.782	0.708187		352.952	-0.412451
317	276	0.370063		388.667	0.816886		102.428	0.813939		297.677	1.42071		463.592	0.754497		216.357	0.639035
318	417.549	1.02226		259.918	1.0733		223.613	1.51637		226.762	-0.162762		451.791	0.838689		272.456	0.397573
319	242.901	0.336582		381.255	0.434038		259.08	1.1231		290.336	0.6388		440.235	0.711463		179.933	-0.466536
320	208.745	0.222819		212.252	0.910364		198.133	-1.3458		193.446	-0.561385		456.456	0.845258		324.372	-0.553379
321	310.172	-1.46333		136.082	0.980987		472.458	-0.510631		329.536	-0.874001		416.26	0.701583		165.525	-1.21337
322	274.779	-1.41717		382.42	-1.42228		301.483	-0.248453		493.725	0.764379		469.943	0.56353		238.964	0.961551
323	137.217	1.36013		307.739	-1.22452		223.09	0.8722		161.026	1.50383		443.61	0.74587		472.605	-0.299423
324	266.714	1.33381		262.866	-0.332068		201.523	-0.430723		332.432	0.559709		510.456	0.703383		317.315	-0.375364
325	300.511	0.66948		363.088	0.934077		263.578	1.55021		361.204	-1.05458		524.041	0.641081		250.61	-0.902164
326	362.46	-1.34534		366.071	-0.672335		317.352	0.557849		431.614	1.18863		517.897	0.608318		233.154	0.954345
327	365.026	-1.00521		274.617	0.135258		197.629	0.144819		238.904	-1.04225		509.429	0.58388		189.481	-0.705969
328	242.932	-0.843008		353.461	-1.2488		108.206	0.286818		320.805	0.953591		490.416	0.680671		400.757	1.18507
329	301.804	0.486606		215.293	-1.22356		315.745	0.697521		403.695	1.24754		451.758	0.659112		263.132	1.1995
330	337.197	0.0583001		190.001	0.750487		224.439	0.881736		189.541	-1.20011		489.816	0.747444		376.924	0.442836
331	297.412	-0.977457		349.328	-1.21862		156.328	0.846839		338.438	0.484301		481.599	0.848689		242.199	0.00701521
332	301.811	-0.918703		216.375	0.612539		353.65	-0.760234		233.63	1.08794		455.982	0.76281		414.155	-1.33782
333	337.173	-0.121893		346.861	0.295766		71.4173	-1.55687		256.299	-0.422727		497.785	0.645622		338.328	-1.15923
334	254.237	0.247169		419.852	0.996271		317.676	0.576464		376.746	-0.883658		352.53	0.563554		275.542	1.04268
335	265.739	-0.239895		340.721	-0.0675538		248.533	1.44844		280.972	-1.51923		313.977	-0.436026		156.746	0.868816
336	292.361	-0.46397		329.965	0.808167		209.299	0.157113		313.559	1.12904		275.355	0.774222		316.623	-0.892009
337	260.058	-0.0704556		243.644	-0.360072		429.753	-0.151904		300.965	1.31967		207.418	-1.15251		339.917	0.665037
338	279.629	0.665142		209.092	0.235172		258.544	-0.284835		269.386	1.03216		211.404	0.146379		99.6562	1.19874
339	255.785	1.21736		208.741	-0.574376		336.038	1.10948		227.025	-1.5708		384.683	-0.231356		290.666	-0.618866
340	324.369	0.543229		201.991	-0.790162		304.759	-1.41853		369.299	-0.845599		155.001	-0.251659		299.396	-0.421097
341	247.634	-0.0415803		425.627	-0.824164		356.359	-0.960665		160.225	0.783389		365.312	-0.417683		195.681	-1.29949
342	322.744	0.094141		213.878	-1.26424		227.795	0.231678		147.228	0.339029		299.777	0.646344		429.342	0.467212
343	263.872	0.224554		367.548	0.613693		214.386	1.00035		423.195	0.255251		191.292	-0.479639		535.756	0.593617
344	295.35	-0.923961		284.152	0.977893		168.567	-0.104604		151.392	0.361619		257.018	0.931992		301.298	-0.797253
345	190.842	-0.901622		156.799	-0.156057		201.415	0.999131		200.947	-0.646637		244.404	1.18758		357.657	-1.37159
346	313.714	-0.449792		317.454	-0.614735		67.1126	-0.433392		538.413	1.02265		278.322	1.12457		348.467	1.20696
347	134.558	-0.164942		257.446	-0.222457		171.141	1.15676		515.469	0.995943		237.408	0.72752		271.378	0.190541
348	490.294	-0.491872		322.503	1.30591		294.819	0.139675		346.023	0.535257		251.575	1.04849		241.319	0.400453
349	342.379	-1.45273		317.042	0.643007		323.902	0.950017		267.194	0.986989		236.869	1.33958		380.584	-1.10847
350	226.305	-0.928596		155.435	-0.0469769		239.31	-0.520174		209.485	1.45162		208.728	0.519931		126.458	1.16096
351	261.054	-0.379183		223.728	0.911005		348.783	-0.641515		335.865	-0.854596		165.91	1.25763		209.509	-0.708012
352	242.384	0.692176		252.675	-0.553672		344.744	-0.412917		344.788	-0.661142		134.838	1.32834		147.222	1.2894
353	173.223	1.42414		412.624	-0.855643		192.581	0.229509		361.277	1.10892		186.119	1.50392		143.108	-0.359533
354	159.909	0.582423		338.939	0.597597		454.837	-0.181588		257.446	0.978626		275.509	0.707367		275.376	-0.0821642
355	192.876	-0.0980138		343.567	-0.168244		208.725	0.973869		262.692	-0.74193		287.916	1.15541		310.773	1.25662
356	267.435	-1.47578		317.405	0.0853935		200.154	-1.21821		247.449	0.52603		227.304	0.625273		309.173	-0.303123
357	331.579	-0.439255		404.186	0.576433		213.716	-0.882361		317.647	-0.0805658		89.9612	0.759976		367.849	-1.01117
358	437.474	-0.808516		344.24	0.491936		335.094	1.42157		330.844	0.602018		301.441	0.287361		221.832	0.0253556
359	322.907	-0.706448		270.151	0.457363		173.204	-1.5708		396.822	0.925324		362.058	0.812327		120.484	-1.29142
360	309.231	-0.273412		346.589	-0.305029		197.734	0.409574		305.016	-1.2033		198.399	-0.0200171		108.76	-0.427161
361	216.161	0.382885		343.813	0.171986		176.902	-1.35439		289.127	0.389043		211.648	-0.387598		397.191	1.23009
362	354.36	-0.766634		279.141	0.325228		309.015	-0.656405		161.902	-0.52228		279.96	1.01432		214.4	0.0986309
363	340.761	-0.529528		233.77	0.211839		251.856	-0.734173		307.36	0.932729		202.921	0.0651733		112.657	0.602813
364	179.345	-0.774628		319.517	0.659		249.851	0.0549719		412.449	0.444332		249.119	-1.07897		252.318	0.351887
365	376.379	0.125543		327.179	-1.42549		315.948	0.666503		192.941	-1.38315		96.7161	0.161226		394.875	-0.623625
366	296.854	-0.275179		323.106	-0.424667		163.166	1.07324		150.039	0.791884		279.202	0.659288		308.161	-1.45137
367	355.83	-0.574579		295.998	-1.26678		264.567	-0.709492		266.564	0.93514		214.527	1.01252		238.385	-1.44406
368	259.26	-0.939747		244.037	-0.0189711		446.41	0.451187		399.482	-1.50212		296.231	1.17782		288.21	0.299082
369	229.722	1.40371		277.253	1.06009		270.7	1.16237		374.548	-0.101943		329.615	-0.211396		318.416	-1.14319
370	224.134	-0.80162		130.985	-0.36001		324.105	1.29967		207.686	-1.3143		374.097	0.570597		275.348	1.28439
371	199.818	0.560769		161.225	-1.24703		182.75	1.15191		286.998	0.0386418		224.918	1.07003		461.466	1.24506
372	275.44	-1.07206		268.301	0.848536		192.569	1.47899		412.772	-1.35884		251.435	0.840785		194.147	1.37318
373	410.598	-0.227178		423.55	0.833131		251.408	0.605085		359.723	-0.229672		199.724	-0.130469		332.791	1.24057
374	384.96	-0.109848		379.233	0.160436		314.764	1.11128		216.799	-1.32077		247.227	0.51539		154.328	-0.116957
375	241.54	1.4442		227.914	-0.92063		304.674	0.267323		410.682	0.704448		243.056	-0.003837		303.093	0.391893
376	326.722	0.526399		343.648	0.014408		305.337	-0.992266		537.159	0.499072		206.386	1.4873		281.614	0.480991
377	218.792	-1.20964		320.005	-0.724526		285.671	0.0202229		388.318	0.608849		156.388	1.51146		160.664	0.549432
378	396.367	-0.685143		391.892	-0.681815		381.935	0.251425		240.16	0.736446		267.12	0.438785		205.622	-1.48802
379	297.685	-0.240316		283.872	-1.2729		253.502	-0.718303		360.469	1.22938		256.665	1.2243		212.523	-0.457574
380	278.271	-0.0793642		184.774	0.647628		289.401	-0.577285		370.628	0.559651		168.421	-1.05312		253.043	1.2059
381	271.66	0.727425		231.941	0.293493		349.856	-0.93905		270.471	0.709575		190.331	0.463377		376.376	1.35325
382	416.462	-1.10455		326.026	-0.0345292		244.155	0.364477		383.064	0.68294		276.07	0.560352		407.816	-0.799068
383	241.232	-0.956517		179.384	-0.993953		252.042	-0.905764		374.636	1.03143		182.742	-1.12494		438.055	-0.324473
384	214.855	1.4611		334.441	0.0632962		229.79	-0.126181		320.408	-0.842248		366.323	0.503193		324.327	0.702577
385	216.596	-0.083153		276.884	-0.0760222		546.809	-0.617276		410.001	0.973582		220.195	0.795885		217.266	-1.07844
386	263.184	0.63264		299.272	1.41881		490.232	-0.762328		392.529	0.756293		150.769	-1.5708		226.746	-0.464285
387	198.532	1.07501		312.411	-1.30247		275.973	-0.349535		270.286	-1.2914		275.274	0.954441		325.945	0.358211
388	255.627	-0.893006		226.746	-0.412956		504.745	1.36625		313.23	-1.36043		247.425	0.699363		299.648	0.591648
389	270.35	0.546268		165.39	1.50158		247.192	1.3492		318.107	0.527864		274.383	0.808596		342.043	0.276236
390	276.212	-0.554673		344.962	0.3282		226.545	-1.25889		374.218	0.589257		347.54	0.724067		223.706	0.365891
391	166.467	0.51141		237.352	0.395639		255.475	-1.08051		415.993	-0.657401		312.267	0.137053		324.383	-1.02007
392	282.624	-0.528525		317.077	-0.639497		257.089	-0.0871487		371.967	-0.0853623		212.77	0.471196		239.651	0.306976
393	349.205	-0.789287		281.256	-0.897203		325.21	0.164611		349.553	1.25545		281.753	-0.52177		335.948	0.489999
394	310.883	-0.149852		292.437	0.628452		422.094	0.191376		184.384	-1.24996		278.641	0.287646		291.011	0.00959372
395	326.728	0.626307		206.726	1.0063		343.868	-0.954478		362.853	1.38646		131.161	1.31051		377.073	0.59147
396	241.923	0.296619		198.552	0.901091		336.175	-1.44369		380.395	-0.622912		245.923	0.175071		248.497	1.15104
397	376.848	-0.418791		201.607	-0.799828		306.167	-0.22081		371.661	0.793228		358.328	0.528278		197.873	0.142988
398	228.657	-0.132506		235.021	0.482279		214.386	0.0089064		262.801	-1.21097		299.346	0.949346		281.715	0.258755
399	271.082	-0.119781		398.656	0.919254		320.223	-0.655736		293.778	1.36806		396.341	0.605486		434.43	-1.10394
400	205.502	-0.317984		214.63	-1.10562		188.486	-1.05436		235.129	1.52402		186.714	1.15739		401.257	-0.859031
401	250.682	1.3015		423.75	0.725653		262.148	-1.07472		244.411	0.858649		229.088	0.791624		258.02	1.19122
402	227.907	-1.16966		403.167	0.610845		255.807	1.40722		467.141	0.00824848		249.018	0.0839807		276.995	1.15155
403	172.595	0.565398		314.314	1.15565		243.612	1.52763		262.943	1.14667		111.105	0.308195		576.725	-0.327727
404	231.525	-1.50555		392.579	-1.09612		367.55	-0.522212		484.992	-1.47176		295.152	-1.29874		321.731	-0.401869
405	247.06	0.457353		248.662	-0.318833		431.734	0.120677		340.894	1.39359		253.376	-0.691927		283.912	0.952276
406	334.484	1.15716		348.849	0.74378		299.614	0.00759898		387.95	1.17704		248.204	1.04427		297.319	0.540072
407	313.143	-0.63735		253.137	0.224178		358.562	0.958793		360.501	-0.324125		283.371	0.953041		369.245	-0.522862
408	319.928	0.119279		249.148	0.639305		230.661	0.294884		444.664	-1.39393		223.935	0.0067262		419.381	-0.139144
409	342.478	-1.26327		224.292	-1.4349		298.817	-0.92715		300.005	1.35684		194.691	1.08839		298.059	-0.546635
410	306.314	-0.678541		224.123	-0.470936		433.483	0.47633		392.242	1.55726		310.172	0.685948		291.173	-0.121275
411	343.716	-0.108931		361.956	-1.26617		172.675	0.721081		390.681	0.367878		256.247	1.10928		247.41	1.46429
412	278.032	1.27874		169.223	0.526489		290.272	-0.77927		234.854	-0.405689		338.985	0.829881		370.569	-1.26495
413	272.965	1.17312		74.3016	-0.771422		210.573	-0.172544		305.729	0.956362		193.685	0.295232		334.714	-1.15176
414	361.419	1.2665		321.643	0.175511		538.714	-0.273721		546.461	0.918825		346.873	0.89052		145.707	-1.45873
415	118.646	-0.932618		328.512	-1.25367		550.402	-1.04654		299.458	0.394948		140.697	-0.202454		363.017	1.50572
416	234.293	-0.939593		303.389	-0.100946		288.489	1.39121		372.438	0.346966		214.512	-1.44992		178.81	-0.922001
417	294.654	0.00278505		306.411	-0.625138		371.145	-0.864602		260.099	0.8626		191.581	-0.403613		304.084	0.117307
418	351.243	-0.281838		383.989	-0.754818		193.601	-0.0855718		179.831	-0.987723		255.447	-0.000926056		330.754	0.277211
419	226.253	0.4343		250.392	-0.899284		326.193	-1.15008		431.378	0.564067		176.536	1.4967		367.354	0.309266
420	360.165	-1.56661		222.183	-0.711547		332.787	0.187276		266.979	-1.28261		225.711	0.846583		413.644	0.734154
421	286.787	1.27038		205.713	0.783773		241.433	-1.47724		328.404	-1.26934		234.425	-0.0840327		265	1.49686
422	366.692	-0.0158771		280.102	1.4052		264.788	0.828493		321.923	-0.995886		261.73	-0.353979		227.514	1.5708
423	332.741	-0.324229		280.008	1.48954		306.186	0.711489		149.37	0.857938		233.269	0.497238		354.072	-0.758442
424	316.121	-0.154735		338.312	1.03969		340.34	-0.0140686		357.337	1.27492		211.248	0.657969		331.509	0.595648
425	451.896	-1.15601		374.636	-0.832653		265.971	-1.18246		235.285	1.45969		247.581	0.890998		273.85	-0.597406
426	253.993	-1.54438		309.269	-0.377945		253.438	-0.0903532		296.751	-0.16716		274.75	1.01511		243.083	0.666674
427	252.772	-0.561721		212.836	-0.899812		197.471	1.42849		208.527	-0.548976		306.195	0.268526		289.749	0.548184
428	286.114	-1.2967		338.063	0.792827		247.829	-0.674389		170.738	1.21935		213.983	1.527		271.342	-1.34039
429	227.678	-1.11838		314.179	-0.502952		224.894	0.36566		183.833	0.845757		186.595	0.0608835		394.659	-0.0832793
430	319.364	-1.42625		209.226	0.552746		373.639	-1.11306		242.195	0.36512		147.766	0.448808		326.79	-1.22039
431	320.743	-0.810022		317.486	0.842438		347.206	-0.978312		271.097	1.02949		267.294	-0.0152313		202.674	-0.85401
432	401.689	0.217523		291.322	0.923745		306.728	-0.210408		243.673	1.02467		246.077	1.56177		320.44	-1.34556
433	190.352	1.52086		394.014	0.54544		410.201	-1.24487		382.855	0.642466		273.813	1.40952		258.013	-1.07985
434	368.284	-0.781945		253.425	-0.385359		258.121	-0.18351		146.088	-0.681469		244.096	0.753066		274.862	-0.599868
435	247.413	-0.0957011		237.889	-1.31195		296.745	-0.174276		276.467	-0.877482		285.562	0.970644		336.663	-0.606907
436	566.17	-1.26804		325.91	-0.450958		278.247	0.741064		260.365	-0.0496116		273.434	1.45445		315.239	-0.604702
437	307.325	1.26487		145.174	1.3637		272.672	-1.44751		357.978	0.66582		245.763	0.335866		195.139	0.674476
438	182.081	0.743189		185.502	0.605497		297.057	1.52704		244.037	1.24457		94.9838	-1.44013		278.355	0.116499
439	261.693	0.0669592		346.058	1.32114		215.623	-0.573893		272.89	-1.28185		207.918	1.39538		227.168	0.180211
440	173.168	0.156986		358.94	0.86085		251.49	0.3139		463.732	0.97643		175.312	-0.00681287		197.4	0.801981
441	429.312	-0.6882		379.825	-0.332437		188.747	-1.3325		353.693	-1.41679		250.21	1.0037		253.505	-1.41104
442	110.992	-0.0512211		308.643	-0.048364		250.308	-1.08321		419.306	-1.23491		224.519	-1.3643		355.39	1.16196
443	345.222	0.507299		190.182	0.497301		195.929	-1.24249		448.305	-1.21839		204.895	1.28374		251.133	-0.767107
444	390.498	-0.496196		334.379	-0.280354		205.213	-1.13877		378.063	-1.3316		167.739	1.0544		234.695	-0.400061
445	288.064	0.153389		324.02	-1.48771		333.79	-0.698318		372.662	-1.52525		188.309	1.33717		235.651	0.197931
446	365.428	-0.707924		143.311	-1.46628		144.374	-0.513958		159.28	0.968591		243.527	0.772082		274.628	-0.376902
447	234.282	-0.307977		309.944	-0.0656426		375.759	0.277467		293.052	-0.0997981		306.07	0.461874		128.783	-1.38082
448	171.32	1.36135		208.847	0.736802		162.633	0.669422		281.747	0.877247		329.706	0.672869		210.311	-1.10389
449	89.5824	-1.47419		373.411	1.19253		249.367	-0.964218		278.133	1.01671		349.388	0.403899		337.377	-0.847592
450	349.981	-0.667327		272.414	-1.55266		204.98	-0.799853		186.599	1.33821		323.696	0.663398		237.792	-0.792217
451	282.021	1.1748		322.013	-0.83746		299.84	-1.33646		336.229	1.11553		271.457	0.722299		203.285	-0.82086
452	257.584	-0.297149		281.379	-0.738755		421.978	0.56001		285.154	0.966451		282.346	0.710583		338.576	0.987347
453	351.553	-0.404647		266.267	0.70009		244.482	0.693768		367.812	0.977906		292.186	0.743203		292.152	-1.5708
454	126.438	-0.364143		349.721	0.716657		228.032	-0.571741		297.512	0.602051		273.874	0.629846		168.384	-1.09139
455	273.518	-0.760994		318.062	0.984385		375.244	0.871077		357.918	0.290353		348.146	0.405901		429	-1.22179
456	397.352	-0.722061		346.387	0.0587108		216.139	-0.402794		312.247	1.11558		309.409	0.505272		323.068	-0.889733
457	91.2335	0.336032		259.458	-1.16809		175.222	0.736322		366.21	0.303219		269.132	0.173328		166.753	-1.07898
458	190.067	0.680609		238.923	0.790891		233.599	0.861185		242.142	-0.823714		331.817	0.288955		205.425	0.647723
459	291.759	-0.482023		347.776	1.38275		288.511	-1.06068		122.379	-0.946397		369.189	0.131317		383.699	-1.07994
460	213.954	0.228954		339.598	0.315269		534.054	-1.02475		200.573	0.620621		267.439	0.0804126		363.428	1.14224
461	316.627	-0.859062		251.23	0.953298		282.196	-0.816322		341.249	0.33541		278.682	0.0177039		300.936	0.962495
462	342.905	-0.353586		337.455	1.32378		216.818	-0.981126		496.455	0.555624		277.387	0.490102		409.164	-1.45312
463	278.855	-0.0558999		326.194	-0.251584		225.601	0.773108		270.028	-0.0921028		216.769	0.748191		255.168	-0.615407
464	228.822	-0.898849		372.436	0.631647		154.214	1.07261		296.175	-1.5708		262.161	0.17705		212.342	0.478419
465	329.535	0.808382		103.678	0.369621		202.677	0.44067		303.617	0.700588		264.099	0.486319		306.391	0.217197
466	329.031	-0.719385		283.687	0.652436		371.13	0.568402		255.848	-0.840525		306.61	0.710627		189.816	-0.824046
467	394.781	-0.447398		357.313	1.28278		262.635	-0.972943		353.026	0.359271		248.569	0.683497		273.806	-0.789284
468	112.1	-0.67431		233.629	-0.567583		152.779	-0.370828		317.365	-0.701897		241.979	0.500724		310.719	-0.104916
469	258.528	-1.18723		246.314	-0.23576		271.292	-0.771262		304.226	1.12509		251.62	0.420938		216.111	-0.337976
470	243.099	-0.163766		350.035	1.49977		299.183	-1.36997		190.263	1.48646		303.364	0.30409		382.316	0.491683
471	305.443	0.409614		378.969	0.683879		203.708	1.32475		297.152	-1.3632		294.255	0.64238		394.008	0.917323
472	323.376	-0.913039		294.484	-0.262461		231.74	1.1432		335.613	0.702675		147.218	1.50148		479.406	0.136218
473	311.411	-0.597374		381.772	0.74258		320.726	1.13894		166.443	0.493532		172.288	0.950165		203.172	-0.435756
474	300.816	-1.11804		207.866	0.633833		284.775	-1.38786		205.295	-1.01323		193.35	0.711493		391.084	-0.158616
475	355.396	-0.525065		243.843	1.26362		196.407	-1.27449		387.583	0.569215		326.105	-1.5708		386.913	0.0682614
476	221.628	-0.467802		227.025	-0.763131		335.224	1.36201		333.859	0.486128		237.408	-0.00421807		318.275	-1.40963
477	332.488	-1.27068		372.221	1.10921		193.781	-0.617717		313.71	1.07448		259.166	0.422704		172.377	-0.144887
478	320.664	0.949144		208.55	1.00984		393.806	-0.650569		327.284	1.33541		170.573	0.336597		511.112	-0.471827
479	312.147	-0.209402		369.62	1.27852		400.086	-0.323965		441.31	-1.49139		248.31	-1.5708		173.094	1.10692
480	277.38	-0.654668		297.645	0.918157		268.33	-0.0511832		283.283	0.354696		251.828	1.03192		337.376	0.662549
481	260.128	-0.071308		388.371	0.912472		435.894	-0.590612		312.268	1.53941		114.387	0.98525		211.157	0.593746
482	366.185	0.378954		140.346	-0.413448		174.706	0.307132		182.632	0.266973		342.767	0.238235		299.131	0.403334
483	341.582	0.188059		292.329	1.36714		290.254	0.116281		237.165	-0.114156		364.964	-0.00268083		369.819	0.439768
484	320.614	0.254868		263.376	0.38128		248.072	-0.57164		249.143	-0.499906		354.967	0.0127294		220.576	-0.0311453
485	366.326	0.240189		265.391	1.39677		288.919	1.20136		381.896	0.703257		345.546	-0.248679		215.69	0.976129
486	385.222	0.0770171		337.089	0.870898		299.866	-1.05137		263.699	-1.55858		301.462	-0.103966		369.791	0.0804314
487	353.223	0.146757		346.77	0.679039		271.85	-0.7503		395.837	1.3253		227.019	-1.5708		237.337	-0.914886
488	314.815	0.287626		382.044	0.330331		273.911	0.083647		251.664	-1.44578		250.8	0.670989		226.556	-0.246483
489	323.294	-0.0038096		243.691	0.557484		185.778	0.148782		241.353	-0.964278		314.44	0.240653		383.12	-0.942063
490	329.71	0.208178		334.799	-1.18827		363.722	-1.53942		251.823	-1.39495		297.76	0.789916		410.435	-0.966025
491	406.917	0.277368		370.78	-1.47203		220.812	-1.05267		422.085	-1.09771		215.07	0.0612858		374.05	-1.07932
492	398.166	0.145767		325.106	0.707917		303.745	0.530343		313.838	1.20544		81.6495	0.843385		432.007	-1.05982
493	392.124	0.234978		171.27	0.198816		337.469	-0.571573		331.646	0.992661		270.316	0.531448		485.852	-0.959966
494	334.33	0.348541		317.06	1.17003		297.86	-1.5262		282.06	-0.797696		107.302	-1.08677		458.92	-0.888785
495	368.242	0.0883182		309.23	1.02153		407.301	0.856667		287.585	-0.767987		218.034	0.849292		443.51	-1.04749
496	353.948	0.298048		231.472	-1.37864		197.827	1.48505		289.633	1.26172		171.02	-0.947312		469.332	-0.919012
497	365.212	0.359383		215.805	0.340362		323.836	-0.434494		293.627	1.5043		132.186	0.534367		519.353	-0.888572
498	366.71	0.209796		255.752	-1.16322		270.605	0.920694		251.377	1.21892		248.001	1.49423		457.144	-0.959549
499	355.788	0.295123		211.969	0.460527		474.009	-1.20159		199.052	0.224222		315.325	0.183668		455.658	-0.956883
500	397.406	0.296194		294.07	-0.0303573		365.069	-1.52848		279.38	0.581749		228.072	0.0635858		470.674	-1.09305
501	327.4	0.304969		333.541	0.0331861		312.737	0.556044		218.097	-0.865433		240.425	0.584307		394.21	-1.50001
502	395.885	0.257076		308.401	1.39627		294.983	1.4668		419.303	-0.877582		221.648	0.710526		167.956	-1.03008
503	378.64	0.0181745		201.173	1.11943		246.626	0.333743		338.521	0.0640602		213.532	-0.292062		292.184	-0.840982
504	386.314	0.169685		425.853	0.974152		183.155	0.277568		360.001	-1.37382		204.285	1.28986		371.71	1.53896
505	386.271	0.293483		221.798	-0.599453		343.615	1.34866		294.551	0.927084		304.342	0.482952		282.675	1.26665
506	385.881	0.415951		265.853	-0.956825		204.66	1.05474		402.647	0.182635		316.018	1.37481		215.457	-0.843837
507	345.829	0.120555		222.523	0.792585		315.906	-1.37133		463.046	0.571781		270.318	0.685523		426.034	0.635569
508	404.085	0.232121		374.719	0.425652		316.889	-0.878757		416.12	1.20386		182.586	0.708201		270.885	0.319617
509	381.103	0.268403		271.174	1.09753		323.527	-1.22483		310.778	-1.24282		307.494	0.693845		246.657	0.58981
510	286.63	0.274842		329.608	1.54814		238.211	1.33029		287.23	0.981585		197.427	-1.04302		204.27	-0.876169
511	297.009	-0.423213		212.398	0.941689		200.452	-1.10004		176.944	1.03093		358.769	0.0659688		179.361	-1.26902
512	287.113	-0.454073		352.507	-1.32032		177.55	-0.323818		244.651	-1.02111		248.107	0.9795		320.64	-1.18102
513	350.787	-0.873539		371.8	1.39954		381.807	-1.4987		303.048	1.20549		189.759	0.343606		125.862	-1.49281
514	260.234	-1.47285		185.847	-0.00186389		231.678	-0.636252		186.013	0.881134		308.551	0.555618		199.899	-0.924382
515	289.16	1.0996		300.233	0.962496		230.472	1.4186		282.923	1.18034		194.111	-0.0409987		229.26	0.278521
516	388.323	-0.494729		249.601	0.417813		205.585	-0.37814		324.228	-0.297854		260.502	0.201264		323.612	-1.39738
517	242.548	-0.865343		335.234	-0.666416		239.709	1.19866		268.042	0.354026		151.729	-0.684837		425.068	1.02151
518	377.737	-0.686022		294.848	0.336475		289.344	1.25738		206.752	1.46354		262.74	0.52973		272.265	-1.07283
519	266.689	-0.227279		506.892	1.1687		275.967	-0.152298		234.574	0.697291		322.227	1.27254		467.689	-1.44979
520	309.322	1.08408		318.505	0.459717		231.697	-0.385554		248.529	0.400547		273.909	1.11896		329.06	-0.704029
521	351.082	0.216975		353.74	-0.63856		184.063	0.207387		310.438	0.307858		170.754	-1.50733		248.228	-0.220818
522	208.241	-0.125555		375.135	0.0383296		529.356	0.355318		328.706	1.48985		266.121	0.327218		322.732	-0.863493
523	205.574	-1.2543		386.274	0.0428786		402.907	0.61899		358.641	-0.85512		153.756	-1.0454		495.314	-0.773478
524	389.675	0.760314		325.652	-0.396491		249.507	-0.606767		287.604	0.751617		125.434	0.452959		282.617	-0.996948
525	257.006	-0.229127		392.929	-0.215857		290.435	0.504266		366.928	1.23577		296.663	0.352541		339.173	-0.920387
526	138.493	-1.20513		368.816	0.553066		423.308	-0.882137		343.236	0.103193		282.025	0.881269		230.085	-1.36441
527	210.58	0.746558		363.425	1.43055		191.301	-0.392528		261.958	0.967559		167.927	-0.895509		501.576	-0.0786163
528	164.005	-0.650322		177.614	0.546966		297.521	0.448766		353.629	0.772779		250.221	0.428968		322.445	-1.23401
529	260.871	-0.257453		207.777	1.36905		398.73	-1.07799		229.921	0.564892		164.33	0.707918		339.554	-1.16258
530	189.138	-1.18383		285.579	0.388119		320.972	0.208995		332.125	0.756764		212.06	0.518136		182.814	1.15478
531	251.98	-1.49728		240.294	-0.341181		537.869	1.15174		310.306	1.14422		240.605	0.0398697		357.496	0.282802
532	265.388	-1.40601		268.951	0.626274		357.525	-1.17692		277.748	0.112815		164.747	-0.0825965		274.412	0.424092
533	175.182	0.576655		313.208	0.290374		360.652	-0.392852		297.894	0.943622		266.209	-0.279316		313.448	0.359459
534	280.996	0.544637		367.851	0.306427		93.1026	-0.0646892		339.634	0.975997		309.392	0.99968		190.607	-0.0854168
535	264.386	-0.675451		389.382	0.985861		188.148	-0.891096		320.594	0.521114		333.961	0.212396		716.761	-1.57048
536	177.916	-0.0552731		225.561	-0.949143		364.5	-0.845814		257.986	0.911028		130.991	-1.32605		287.637	-1.46543
537	316.787	-0.334527		245.337	0.536615		348.629	0.913964		256.083	-1.3215		177.959	0.177627		608.774	-0.613608
538	371.966	-0.569778		322.567	1.30872		144.002	-0.891297		253.493	1.31685		343.754	-1.53338		265.464	-0.0536845
539	298.603	-1.01262		264.008	-1.46971		216.716	1.21589		351.027	1.07947		141.801	0.141156		319.593	0.567547
540	339.218	-0.997887		253.611	1.49393		315.191	-0.631682		361.008	0.87013		212.587	-0.142535		342.89	-1.04402
541	320.636	-0.170015		267.752	-0.476062		455.831	0.973426		323.213	-0.355676		228.11	1.38422		215.69	-0.982858
542	257.203	0.892084		303.921	0.848831		199.484	0.573343		363.802	0.781174		260.99	0.208451		384.701	-0.81977
543	227.058	-1.22117		245.337	-0.581984		327.355	-1.38402		265.676	-0.162102		82.9291	0.642657		389.027	0.329328
544	371.966	1.16877		234.107	-0.345733		275.957	0.0248045		431.487	-1.16976		166.464	1.02484		245.508	-1.32461
545	190.188	-0.603614		205.016	-1.4895		363.58	1.38809		403.914	-1.038		198.932	-0.100714		76.6119	0.199108
546	128.292	0.783703		248.468	1.35582		410.6	1.21356		336.367	0.602606		156.509	-0.699856		210.431	-0.569219
547	255.194	-1.01177		249.849	0.322847		281.35	-0.973096		258.082	0.683434		345.51	-1.44569		379.725	-0.308871
548	283.98	-1.27904		366.918	0.697425		376.138	0.307058		291.196	1.13676		271.614	0.855914		178.139	0.966344
549	298.581	-0.119353		352.822	0.738721		182.311	-0.578977		251.933	0.640151		281.531	0.196917		318.553	-0.102176
550	336.166	-0.673652		368.982	1.12292		310.953	1.54472		243.623	1.38694		120.474	0.01499		280.341	-1.07918
551	278.326	-0.618148		463.287	1.17594		442.242	0.263494		353.134	-1.36465		240.134	-0.74214		335.107	-0.805272
552	325.659	-1.08643		413.703	1.06997		380.505	-1.19288		403.972	-0.38077		322.146	0.544012		316.089	-0.284556
553	324.72	-0.768544		442.128	1.16307		247.267	-1.12562		296.832	0.4234		203.179	-1.12456		216.602	-0.771377
554	202.461	0.830844		459.941	1.16196		234.539	0.469599		306.7	-1.39521		265.721	-1.42322		355.574	-0.0397135
555	309.798	-1.0096		457.501	1.19643		251.533	-0.979396		279.205	1.02643		272.271	1.36172		139.938	0.297467
556	231.039	0.185807		420.345	1.04203		306.401	0.725309		191.513	0.271301		312.143	-0.671146		338.589	0.939907
557	351.745	0.0639459		402.603	1.24543		235.276	0.978606		322.757	0.285198		258.426	0.754559		313.873	0.694273
558	282.915	0.882341		467.168	1.18236		146.443	-0.892238		226.878	-1.29456		191.545	0.213053		312.316	-0.97507
559	319.014	-0.750563		453.036	1.12147		90.5117	0.17622		232.269	1.37847		236.717	0.372042		225.348	-0.0342896
560	267.896	-0.802205		435.073	1.2122		292.501	0.470481		300.355	-0.52907		386.996	0.0924039		289.153	-0.231604
561	282.527	-0.680437		420.491	1.05212		307.15	1.25005		334.428	1.09881		154.096	0.759589		298.817	-1.01926
562	296.411	-0.109984		436.37	1.13744		388.676	-0.750275		346.921	-1.07803		208.631	0.129028		350.98	-0.56771
563	357.559	-1.33995		450.548	1.1551		497.24	0.492706		300.614	1.45809		222.671	0.948501		234.074	0.548667
564	282.129	-0.992802		442.745	1.11813		200.759	-0.887502		400.946	-0.744978		299.296	0.81645		348.87	-0.967737
565	379.713	1.45811		438.723	1.09631		188.585	-1.25009		204.511	1.38168		282.674	0.599552		281.653	0.496295
566	248.245	-0.610246		412.525	1.23939		355.14	1.10339		372.857	-0.178988		231.653	-0.462635		298.421	-0.843686
567	281.099	-1.07526		455.32	1.20163		219.167	0.771497		303.933	0.530108		298.038	1.44169		278.698	-0.918526
568	337.041	1.18703		450.52	1.13729		351.225	0.943438		245.938	-1.12884		199.225	0.357877		269.7	1.5708
569	222.241	-1.07435		453.669	1.10069		557.9	-0.865089		148.263	1.15512		193.322	0.461913		459.162	-0.422922
570	214.109	0.870466		460.992	1.12568		327.779	-0.422554		203.452	0.505474		129.043	1.32911		158.557	-1.14884
571	346.279	-1.06466		420.157	1.28005		308.69	1.43745		325.913	0.673665		119.784	-0.553672		216.028	-0.21419
572	311.66	-0.878213		441.666	1.11281		489.265	0.508331		373.95	-0.470404		318.396	0.832864		270.228	-0.323521
573	284.348	-0.0926054		443.082	1.19051		376.415	1.38953		264.101	0.215184		322.102	0.455066		266.374	-0.606898
574	371.039	-0.765979		458.31	1.15166		276.592	-0.779769		178.151	-1.04114		314.43	-0.18755		406.985	-0.81165
575	320.768	-1.23181		445.054	1.11024		223.122	0.326489		164.16	0.90551		207.572	1.22072		260.739	-1.10536
576	158.935	0.139475		428.754	1.10927		313.058	-0.276996		269.786	1.21599		277.943	0.322343		338.493	-1.27508
577	251.551	-1.21896		382.288	1.0798		351.381	1.32386		302.116	-1.42769		341.913	0.407223		430.122	-0.395791
578	320.14	-1.02842		453.669	1.15381		178.607	1.05516		343.998	-0.484912		196.119	1.12077		201.723	-0.600429
579	354.608	1.41178		414.897	1.07014		252.725	-0.310044		287.994	-0.886361		167.52	0.832755		185.62	1.48403
580	376.061	-1.0069		452.036	1.08362		398.926	0.164504		340.303	-1.38062		159.653	-0.95847		271.695	-0.580562
581	245.153	-0.729167		454.508	1.15242		406.299	0.454223		357.016	0.461435		179.211	-0.370168		95.6942	-0.847948
582	377.677	-1.10799		425.431	1.15069		191.298	-0.61404		192.771	0.758122		143.24	0.45473		262.01	-1.38217
583	361.005	-0.958999		480.599	1.09146		148.412	-0.133941		281.959	-0.796204		163.57	-0.318995		333.596	-0.358678
584	259.303	-0.845491		455.294	1.09268		406.774	-0.381688		47.7188	1.5708		125.422	0.371952		256.02	0.415279
585	209.664	0.433557		447.738	1.10573		316.248	1.24343		373.577	0.323404		193.639	-0.0970134		365.783	-0.997621
586	276.986	0.983346		452.279	1.14781		404.116	0.00901292		273.317	0.763985		75.8782	0.0618249		211.497	-1.50849
587	142.322	-0.183721		469.19	1.07673		219.602	-0.229959		211.904	1.09071		300.729	0.153462		209.393	1.52203
588	171.386	0.614367		469.672	1.09003		144.486	-1.23616		212.638	1.34854		391.041	0.263353		217.955	1.13485
589	246.579	0.486442		454.465	1.09811		381.792	0.907567		233.43	-1.07229		268.904	0.201288		113.739	1.5708
590	352.393	-0.706737		419.85	1.16246		245.836	1.01425		420.342	-0.398069		184.68	-0.0723103		140.383	0.372299
591	226.334	-0.423722		464.545	0.995834		286.064	1.5708		322.614	1.04452		352.015	0.0282981		377.554	1.53621
592	285.357	-0.422751		400.252	1.14572		245.647	1.51346		286.31	-0.541516		397.803	0.0205655		256.797	-0.479958
593	328.21	1.5708		455.323	1.02292		252.417	-0.255854		131.346	0.689708		447.197	0.0165427		411.96	-0.807544
594	359.403	0.197811		440.745	1.12565		329.469	-0.049015		262.77	1.16037		455.509	0.0885686		331.952	-0.74582
595	283.873	-0.9162		431.284	1.11143		227.158	1.49017		301.157	-1.5708		383.804	0.733376		294.088	-1.24271
596	214.932	-0.560483		451.784	1.15948		217.043	-0.278177		294.926	1.46403		432.992	0.754827		118.649	0.969648
597	228.305	0.17063		484.235	1.10637		229.934	-0.245342		280.536	0.548699		338.361	0.513611		288.352	-0.82577
598	322.241	1.36889		480.702	1.10909		332.126	0.0670072		240.399	1.17319		324.183	0.544528		300.918	1.30366
599	282.068	1.07886		449.295	1.18831		266.522	0.636276		201.335	0.344413		285.581	-1.4436		273.763	-0.907448
600	274.295	0.3821		433.521	1.11891		192.5	1.41314		182.897	1.05482		223.235	-1.46724		137.189	1.25665
601	228.424	1.5708		432.707	1.14089		214.955	1.45919		228.272	-0.863683		280.242	1.3107		68.1345	0.128566
602	135.59	-0.073852		392.44	1.0889		229.072	-0.74375		250.637	0.166563		373.239	1.2831		424.041	1.1039
603	353.984	-0.334039		433.786	1.05272		333.673	1.08073		287.824	-0.837694		280.121	0.549431		276.207	0.17354
604	328.178	-1.32813		438.11	1.11479		357.426	-1.1168		270.847	1.3341		181.256	1.1141		232.357	0.39873
605	386.639	-0.2118		437.17	1.11966		151.896	0.817937		184.093	1.12812		307.172	0.453075		297.365	1.54827
606	332.05	0.434569		416.343	1.09063		351.635	-1.3421		154.091	1.02573		334.91	-0.023241		389.456	-0.488836
607	355.827	-0.980632		456.434	1.08266		230.388	-0.883436		276.753	-0.286273		304.312	0.0605572		213.371	0.504483
608	315.273	1.48405		442.133	1.11471		424.246	0.422692		261.983	1.11631		210.493	-0.235935		250.576	-1.10148
609	328.128	-0.451896		484.168	1.1523		200.765	0.536684		200.764	1.31006		275.62	0.0498653		237.502	0.391517
610	222.165	-0.503968		437.252	1.06752		393.506	-1.32995		417.13	0.562717		193.82	-0.203793		289.163	-0.110174
611	378.03	-0.256151		445.459	1.16413		137.997	-1.50543		293.234	-1.408		287.491	0.39067		326.265	-0.649974
612	378.734	0.15708		446.95	1.16866		288.741	-0.903232		304.072	1.21357		235.769	0.413494		186.421	-0.814424
613	220.693	-0.32847		470.819	1.05988		309.483	-1.21945		232.788	0.531651		228.945	0.186646		322.127	0.337713
614	293.653	0.815974		463.997	1.27163		260.876	0.733213		330.021	0.81992		148.519	0.867146		329.146	0.276725
615	292.388	0.327732		443.226	1.09233		186.226	0.830988		201.798	-1.23767		187.879	-1.36357		428.442	0.24469
616	293.894	0.498374		469.072	1.09381		180.179	0.879888		225.056	-1.22093		210.541	0.129854		309.055	1.13096
617	311.395	-0.605838		408.165	1.12666		302.793	-0.190443		288.581	1.27316		231.516	0.866142		343.148	-1.12508
618	375.228	1.32271		475.391	1.1556		188.314	0.931658		241.503	0.596744		258.44	0.99735		602.341	1.23875
619	275.826	1.14677		477.154	1.12784		298.148	0.948354		208.005	-0.018581		215.184	0.734775		366.578	-1.43997
620	158.733	-1.29724		475.499	1.12099		227.691	0.0918647		276.708	0.470111		248.529	0.480577		276.358	-1.01171
621	153.209	-0.171219		425.684	1.08294		392.404	-0.769706		254.724	0.0832878		292.083	0.764844		337.22	-1.01748
622	304.629	-0.633107		442.33	1.1577		355.634	0.609903		224.094	-0.836528		190.153	1.2239		184.688	0.200698
623	219.162	-1.10942		472.459	1.12879		275.417	1.37677		202.857	0.801211		226.512	-0.384882		248.87	-0.883079
624	95.2947	-1.19174		448.631	1.08935		314.274	-0.842109		163.489	0.0578459		289.436	-0.629277		364.738	0.913341
625	162.558	0.523618		491.299	1.11893		266.568	0.36308		139.792	0.00805956		104.281	1.25341		237.766	-1.443
626	295.682	0.224517		438.263	1.06784		195.525	1.54608		305.252	-0.893449		192.262	1.24375		320.024	0.943556
627	362.011	0.159632		493.801	1.16232		250.285	0.656899		197.937	-0.124389		200.722	0.447368		215.277	-0.95741
628	202.745	0.968216		465.708	1.05308		523.67	-1.36497		406.599	-1.41625		299.143	-0.924243		266.299	-1.5708
629	237.628	1.47754		475.818	1.06957		206.797	1.19154		338.619	0.520351		163.178	0.422905		264.926	-0.626103
630	165.571	-0.0660844		437.7	1.02619		269.71	0.176763		285.577	0.265163		184.885	0.274577		306.173	-0.60616
631	270.088	-0.827309		480.849	1.10187		277.053	0.618003		277.127	1.52509		83.9118	-0.291765		323.167	0.650958
632	139.374	-1.25983		466.175	1.1265		324.2	-0.747954		211.267	-1.24803		179.215	-0.721666		295.719	-0.120507
633	352.806	-1.44973		450.285	1.02932		307.316	1.35557		200.26	-1.40368		189.852	-0.213436		456.075	-0.430011
634	221.356	0.821489		449.362	1.03918		200.448	0.553466		271.91	0.697646		287.355	0.754243		219.002	0.424261
635	362.035	1.49718		457.69	1.0881		391.767	-0.732787		316.795	1.11581		321.117	0.196592		310.373	-1.29583
636	183.546	0.23198		438.651	1.18201		236.84	0.187657		318.518	0.993647		319.082	0.161458		350.981	-1.07295
637	240.449	-1.56962		475.459	1.11036		291.826	0.348127		318.968	0.641221		276.178	0.699213		277.291	-0.887443
638	246.271	-1.52345		498.284	1.12699		327.696	0.132807		281.672	0.580226		220.612	-1.18093		315.587	0.247468
639	333.678	-0.365957		477.595	1.07805		420.9	0.715876		410.152	-0.996372		231.028	0.843483		230.653	-0.928733
640	253.586	-0.349484		479.642	1.0158		82.9955	0.237233		480.493	-0.205862		305.782	-1.39339		348.987	-1.48289
641	247.982	-0.499613		457.772	1.03562		265.723	-1.49839		327.341	-0.193803		267.432	0.936971		451.597	-0.396652
642	267.681	-1.05682		460.559	1.01279		145.465	-0.143708		228.996	0.183494		131.676	1.30706		142.392	-0.382553
643	317.981	-0.910223		436.767	1.14261		164.336	-0.637583		292.264	1.08439		229.486	0.909421		253.191	-0.649316
644	287.544	1.31686		494.587	1.05446		307.721	0.302693		169.276	1.4452		357.585	0.574694		236.823	-0.679147
645	354.281	-0.464508		471.905	1.07579		255.797	-0.625659		148.148	1.07489		137.025	1.5708		286.948	0.548126
646	432.275	-0.742057		453.963	1.08398		161.273	0.162071		294.036	0.263626		288.353	0.794417		407.873	-0.820324
647	253.29	-0.0788871		461.373	1.1157		269.257	0.3719		276.442	0.990757		286.526	0.546404		283.472	-0.195881
648	286.203	-1.23862		429.68	1.02388		285.793	0.0292266		356.877	-1.46265		263.823	0.311292		487.366	-0.86086
649	355.323	0.456801		477.531	1.06291		283.536	0.623318		270.903	1.51633		222.512	-0.907764		478.63	-0.69897
650	322.2	-0.290176		464.402	1.08075		181.349	-0.962953		166.017	-1.39831		236.958	-1.43331		550.262	-0.439036
651	322.337	-0.375823		448.418	1.09363		257.844	-1.53523		317.861	0.0892526		261.177	1.5708		348.868	-0.139248
652	344.098	-0.406143		451.874	1.12888		168.264	0.435324		412.116	1.35951		125.855	-1.37277		235.915	1.28878
653	215.097	1.52689		439.362	1.13535		414.981	-0.151927		352.272	0.88952		209.665	-0.712788		274.712	-0.296078
654	322.597	-1.47438		447.869	1.05968		157.58	-1.5708		201.461	-0.149741		184.319	1.19573		343.673	0.906457
655	142.961	-0.835448		438.246	1.08074		158.791	-0.867784		389.682	0.158341		318.769	0.623496		715.947	-1.57052
656	189.272	1.34387		476.816	1.08873		124.706	-0.534622		161.004	0.653465		316.23	-1.22656		378.939	1.28275
657	334.451	0.101975		433.635	1.24451		198.016	-0.199394		267.092	-0.78096		202.84	1.49302		183.547	0.727921
658	415.855	-0.0209978		492.268	1.0832		141.541	-1.51381		160.939	0.915346		365.252	-1.38571		307.298	0.983735
659	301.303	0.530957		457.722	1.16384		276.454	-0.759412		257.147	1.35429		364.045	0.271658		264.952	-0.0758133
660	347.376	-0.358491		403.97	1.1537		127.798	0.33999		267.409	1.12068		193.198	0.545159		144.871	-0.757937
661	273.065	-0.508491		460.992	1.05884		245.832	-1.39438		307.8	-1.48951		312.173	-0.338762		291.915	-0.371616
662	258.337	0.47407		412.577	1.05653		232.928	0.556756		186.393	-1.21459		288.814	0.0251919		301.313	-0.329663
663	378.845	-0.670435		470.036	1.10017		491.782	1.40931		180.906	0.910948		177.991	-0.21336		256.058	1.46596
664	393.733	-0.614765		477.773	1.07275		138.195	-1.28271		213.774	1.27671		263.886	1.06588		390.27	0.756253
665	270.711	-0.969064		440.329	1.02941		302.104	-1.51505		352.177	0.416056		372.484	-0.121955		165.826	-0.597925
666	294.159	0.0154315		441.325	1.07508		204.811	-1.2915		282.627	0.710978		130.048	0.0571332		303.78	0.740379
667	183.078	-1.19844		483.039	1.12235		447.062	-1.30021		313.662	-0.026391		234.294	0.812884		188.555	0.775274
668	254.948	-0.479925		456.407	1.00281		343.054	0.267874		213.737	-1.41581		327.763	0.65858		178.463	1.30547
669	229.454	-0.957629		473.938	1.10441		316.334	0.627015		410.383	1.31797		232.093	0.0130899		325.917	-1.07357
670	366.174	-1.22663		442.351	1.12586		264.46	0.8087		284.617	-1.37819		147.96	0.354306		318.853	-0.471451
671	330.68	-1.42873		452.401	1.0195		341.768	1.06817		301.797	0.259713		204.341	0.624319		326.009	0.471859
672	376.034	-0.816946		400.447	1.17092		288.104	1.0035		124.605	0.226171		241.457	-0.0130891		293.931	-0.574524
673	300.48	-1.11568		442.533	1.06985		245.151	1.08915		270.437	-1.16325		235.508	0.381807		372.348	0.19871
674	214.878	1.40029		436.965	1.21396		211.72	-1.39581		362.171	-0.910606		219.689	0.219319		325.338	1.37615
675	326.345	-0.3853		420.421	1.13788		449.059	-0.0967347		349.352	-1.5708		251.047	0.504342		298.575	-0.19202
676	288.933	-0.982524		452.961	1.20691		375.762	-0.538242		300.015	-1.5708		287.338	-0.00372297		341.203	1.13637
677	245.593	-0.308777		410.107	1.12428		305.383	0.352895		228.115	-1.35604		338.194	-0.426197		250.885	-0.532963
678	168.238	-1.08584		455.652	1.19899		153.569	0.639805		336.701	-0.94695		348.138	0.0967417		352.74	1.08208
679	293.889	0.667908		455.17	1.22234		232.398	0.136649		313.986	-1.46941		317.492	-0.213553		385.293	1.29789
680	448.937	-0.925345		396.139	1.20274		315.096	-0.758427		216.703	-1.42132		307.916	-0.101201		236.98	0.804812
681	253.847	-0.942957		386.369	1.07388		372.712	-1.3057		362.982	1.48293		297.209	-0.0557931		305.647	0.201771
682	116.35	1.25534		377.311	1.24609		185.132	1.37799		356.362	-0.788429		348.123	-0.11227		278.72	1.23686
683	204.26	0.796491		455.195	1.13922		392.656	-1.34423		241.434	0.44248		315.094	-0.480342		327.978	0.618241
684	327.227	-0.492192		474.268	1.12833		549.82	0.0130934		334.712	-0.175367		313.132	-0.0850626		250.929	1.49157
685	271.301	-0.789524		442.55	1.06329		103.786	0.424505		227.796	0.847561		334.339	-0.0392095		331.591	0.00830933
686	342.733	-0.827619		461.76	1.16726		230.922	0.820822		224.616	0.81087		412.316	0.0248003		362.696	0.435913
687	245.114	-0.63441		468.381	1.08293		318.754	-0.589959		444.217	-1.02775		446.181	-0.112855		277.298	-0.266299
688	137.071	0.0919008		415.481	1.21934		245.957	1.26584		431.898	-1.29253		416.738	-0.163879		175.747	-1.47704
689	225.768	-0.744781		417.351	1.12531		288.616	0.439085		450.1	-1.27876		427.2	-0.236663		290.634	-0.588294
690	315.626	0.828419		445.208	1.24159		164.189	-0.849684		451.701	-1.31044		403.831	-0.0986484		337.216	-0.466604
691	322.006	0.468559		492.985	1.1313		161.289	-0.287567		459.824	-1.30602		409.138	-0.0562859		371.654	-1.31862
692	141.655	0.153551		463.936	1.14284		360.901	-0.77942		427.177	-1.28127		506.848	-0.163037		339.743	-1.12736
693	285.843	1.18417		407.627	1.18302		138.136	-0.48548		405.862	-1.23401		497.631	-0.109312		317.08	-1.27205
694	304.472	0.197984		458.201	1.10023		269.258	0.408626		443.172	-1.26188		576.79	-0.130433		364.988	-1.3281
695	307.677	-0.84819		461.669	1.16609		333	-0.846195		392.225	-1.25976		562.84	-0.240815		195.029	1.5708
696	439.287	-1.10217		443.453	1.15214		319.511	-1.52163		447.115	-1.10572		540.371	-0.22522		347.55	-0.773634
697	409.648	-1.34425		391.776	1.15369		261.61	0.209135		477.328	-1.32355		518.045	-0.158991		357.352	0.771252
698	340.641	-0.509106		426.506	1.14515		344.263	-0.597505		464.057	-1.2044		499.667	-0.156149		214.608	0.38834
699	115.794	1.09703		435.624	1.17465		139.372	-1.11331		490.372	-1.24605		524.563	-0.220445		333.782	-0.837562
700	320.104	-1.06994		376.409	1.12774		83.1529	-1.26192		427.698	-1.17869		523.185	-0.0752637		356.619	1.53229
701	234.072	0.719718		443.414	1.17635		325.889	-0.197758		459.006	-1.19755		561.097	-0.136503		352.289	0.0142306
702	231.401	0.233429		433.028	1.19427		342.443	0.0241152		442.774	-1.15146		493.653	-0.191267		185.189	-0.0181133
703	301.642	0.373915		468.227	1.1249		329.677	1.17022		453.044	-1.18361		469.125	-0.153121		140.291	-0.330305
704	171.176	1.37805		486.403	1.25468		292.188	-0.499071		494.411	-1.20268		430.615	-0.208112		345.647	-1.54587
705	219.128	-0.540657		433.112	1.12104		216.225	-0.0432086		483.034	-1.25119		488.217	-0.110395		541.358	-0.697633
706	307.483	-0.552215		445.276	1.29231		306.028	1.52083		449.562	-1.13718		131.265	0.895191		273.684	0.680862
707	256.554	0.756842		442.935	1.11659		334.247	1.44239		446.222	-1.29089		269.213	-0.20595		194.892	-0.908605
708	378.865	-0.420229		475.854	1.14469		304.467	0.0980972		502.884	-1.19316		173.939	1.19819		445.901	-0.914599
709	194.033	-0.132772		481.626	1.17543		349.163	0.25584		478.675	-1.21699		290.458	0.61346		133.496	-1.00348
710	329.923	0.206745		419.385	1.08501		292.547	0.802556		414.232	-1.25777		314.912	-0.0856133		249.083	0.721362
711	345.849	0.22087		480.914	1.19367		439.715	1.30697		455.843	-1.20958		377.718	-0.24135		412.148	-0.830895
712	398.206	0.115133		451.846	1.17594		206.822	-0.303371		328.116	1.5708		244.722	0.940633		242.69	-0.336892
713	373.006	0.121421		449.002	1.12768		304.662	-0.308218		230.935	-1.21505		282.999	0.646698		351.031	0.938468
714	319.744	0.206608		433.933	1.13538		236.269	0.309732		343.625	-0.43725		219.817	0.320496		390.396	1.13966
715	377.214	0.213		451.879	1.22048		165.891	0.0365838		196.16	0.842641		143.419	-0.144993		321.642	0.404783
716	307.858	0.321169		430.024	1.22706		387.699	-0.630887		320.921	-1.43444		246.287	-0.0133951		286.723	-0.403284
717	337.56	0.332436		432.27	1.17138		270.495	-0.999258		331.244	-1.33265		317.643	-0.34758		385.127	-1.13751
718	365.491	0.387563		424.487	1.16299		186.838	0.910985		259.016	1.32688		359.356	0.424154		295.284	0.978566
719	421.659	0.301368		444.545	1.11965		311.996	-0.829209		174.177	0.146699		239.381	0.442647		329.514	0.0458047
720	349.715	0.388692		433.589	1.23004		176.302	0.948474		329.029	0.476994		156.121	0.645683		361.538	-0.244567
721	365.732	0.274834		432.011	1.14803		468.543	0.698245		160.313	-0.173119		181.799	-1.39168		397.23	-0.345652
722	310.579	0.252419		445.271	1.02269		224.379	0.269812		306.739	-0.976897		342.207	1.4747		225.655	-1.56579
723	375.427	0.224522		426.684	0.954173		278.329	1.33299		313.356	0.652218		239.049	0.163486		345.279	-0.645548
724	360.219	0.305744		426.453	1.11168		212.904	0.173624		305.321	0.62077		264.832	0.838937		424.032	-0.908463
725	348.97	0.206631		423.398	1.07455		254.993	-0.580635		260.04	-1.25336		268.869	-1.37207		299.528	-0.398834
726	409.271	0.214811		459.133	1.06882		162.116	1.2881		280.823	-0.82027		278.799	0.497501		367.021	0.675261
727	378.9	0.286877		431.536	1.07894		115.765	0.182341		239.594	-0.348234		162.219	-1.43284		277.626	0.601349
728	387.799	0.285863		408.184	1.01396		161.78	-0.39111		313.082	-1.41067		323.632	0.296347		403.592	-1.39391
729	384.685	0.200766		442.712	1.08786		231.306	-0.533767		381.281	-0.793338		379.613	0.353808		344.599	-1.31384
730	400.342	0.189689		488.104	0.965992		256.71	-0.18988		236.814	1.51903		335.391	0.472297		334.85	-0.00815722
731	364.527	0.089052		465.519	1.06756		344.754	1.56913		391.036	1.46701		120.495	0.130961		370.805	0.191843
732	407.722	0.0956146		451.693	1.03126		242.734	-0.687928		307.754	-0.952992		289.129	-1.04974		440.348	-0.884599
733	396.434	0.249737		476.53	1.04842		365.039	-1.47289		298.123	-1.32767		265.764	0.849684		139.562	0.209185
734	212.985	0.452845		405.57	1.07535		301.037	-0.327264		378.766	1.13882		103.01	0.290707		300.033	0.284166
735	328.165	1.21138		462.32	1.18793		309.754	0.729187		150.253	0.789804		164.979	1.29902		409.031	1.16447
736	320.13	0.277065		445.709	1.08679		294.914	0.284142		287.396	0.685038		312.734	0.726881		307.879	0.942079
737	227.434	1.27735		467.442	1.14598		378.583	-0.087465		295.953	-0.606192		331.862	0.375681		256.049	1.00007
738	258.959	-0.17009		440.782	1.09646		297.328	-0.415275		270.206	0.14589		173.153	-0.757723		446.234	-1.22443
739	350.162	-0.492132		453.358	1.14297		433.599	0.398636		210.465	-1.12832		149.067	-0.866281		256.204	0.968976
740	262.92	-0.9605		436.733	1.0454		315.577	0.914002		316.99	-0.385791		201.819	0.605758		340.404	-1.04034
741	304.957	-0.81389		406.745	1.09471		338.497	-1.01789		265.859	-0.0614003		162.553	0.102259		337.551	-0.609173
742	308.002	-0.535636		412.099	1.14625		419.829	0.781896		271.793	-1.25124		277.419	0.544433		211.958	-0.50157
743	295.585	-1.14159		448.27	1.09854		321.798	0.551066		310.014	1.40002		194.616	-0.159479		194.749	1.1282
744	260.383	-0.571837		438.141	1.132		199.883	-0.818267		327.251	0.791914		282.793	-0.0531371		271.363	-1.00899
745	269.572	0.159286		439.714	1.10969		272.9	-0.444515		178.016	0.963408		318.32	0.257624		243.375	-0.693986
746	250.508	-1.50368		446.445	1.11673		139.275	0.975067		206.637	1.48899		340.509	0.27451		284.196	-1.25204
747	284.495	1.02824		452.575	1.09302		186.409	-0.545846		404.666	-1.34248		181.787	0.743857		410.017	-1.41397
748	305.028	0.0687813		467.727	1.12455		251.637	1.30171		297.272	1.42704		165.3	0.676044		384.847	1.55911
749	284.521	-0.479264		511.433	1.03544		322.18	0.495156		322.504	0.741953		260.725	-0.0548875		294.985	-1.22796
750	282.119	-1.1187		413.876	1.0689		263.02	-0.622879		182.885	0.922665		226.975	-0.516623		248.658	1.04463
751	270.805	1.16444		455.809	1.15822		343.244	-0.037915		274.511	-1.36089		368.997	-1.11906		405.562	-1.42724
752	131.795	-0.671654		433.35	1.22196		156.744	1.32472		357.113	-0.721515		169.666	0.430121		259.452	-1.36854
753	155.154	-1.00867		480.357	1.12585		194.311	-0.113207		163.281	1.08886		233.606	0.830376		305.58	-0.878887
754	243.889	-0.986412		476.258	1.13881		264.069	-0.7651		400.874	0.851385		77.2131	0.240611		415.078	-0.682804
755	372.161	-0.583145		476.337	1.08353		166.491	0.0902582		283.926	-0.0453014		256.723	0.745681		159.374	0.432811
756	314.767	-0.341371		440.072	1.17678		246.043	0.620923		467.982	-1.30673		233.947	0.516557		429.466	0.139831
757	227.251	0.671062		410.556	1.08935		214.207	0.776239		437.235	-1.28069		222.527	-1.16516		464.094	-0.588184
758	415.449	0.0256605		405.889	1.15739		396.979	0.0266496		448.913	-1.21346		246.146	0.705235		169.143	-1.3499
759	254.81	1.38866		461.649	1.13844		614.765	-0.850078		458.693	-1.19709		297.408	0.495311		300.18	-0.185406
760	315.668	1.26785		441.944	1.08674		168.971	-0.220603		439.785	-1.29342		147.193	-0.0410702		301.874	1.2888
761	347.491	0.56351		428.368	1.03849		203.72	0.486556		435.762	-1.31255		305.67	1.06046		195.914	0.593262
762	273.144	-0.731191		456.19	1.00404		199.763	0.65965		459.834	-1.17075		131.428	0.203154		369.503	-0.308796
763	275.176	-0.512453		429.72	1.11589		338.556	-1.30427		458.241	-1.23563		346.643	0.0966713		360.025	-0.560745
764	201.171	-0.510415		447.758	1.25417		267.555	1.27221		483.95	-1.28491		269.54	-0.0717319		312.773	-0.550148
765	127.025	-1.36687		448.364	0.968124		339.66	0.274225		445.699	-1.23224		315.865	0.190909		340.963	-0.766185
766	241.868	1.24789		459.51	1.14		240.724	0.857579		442.975	-1.2694		374.344	0.545764		327.275	1.39405
767	315.689	1.13683		489.18	1.08822		566.209	-0.366026		464.957	-1.23859		301.026	1.17237		290.501	0.386913
768	326.61	-0.637928		463.884	1.08762		214.925	-1.01289		444.46	-1.36533		199.863	0.416722		332.46	-0.0291585
769	302.227	0.235301		389.052	1.23375		265.617	-0.89007		487.195	-1.22495		261.595	0.204109		441.854	0.862419
770	296.434	-0.602614		413.596	1.05085		531.197	-0.785677		447.107	-1.22687		291.184	0.23452		427.053	0.988075
771	167.229	-0.45856		412.785	1.03766		277.992	-0.974675		461.392	-1.13545		391.01	-0.372829		240.101	0.369955
772	265.327	0.268249		482.216	1.05848		152.869	-0.762126		528.891	-1.28293		235.053	1.16297		301.346	-0.480538
773	247.583	-0.133045		465.484	1.08863		367.801	0.526816		494.313	-1.28231		208.009	-0.308836		453.808	0.467814
774	244.682	-0.468088		450.183	0.977337		235.313	0.648669		468.203	-1.14735		120.183	0.541853		264.047	-0.896683
775	179.569	-0.429752		425.603	1.12284		209.341	-1.01871		449.553	-1.25549		178.134	0.622157		346.101	0.873809
776	287.997	0.968905		460.186	1.11928		477.738	-0.718464		499.698	-1.20059		212.422	0.499019		258.738	1.35934
777	236.322	-0.506525		474.129	1.2509		312.068	-0.292135		480.953	-1.17582		158.873	0.290257		315.942	1.19939
778	191.924	-1.41674		439.265	1.10511		221.12	0.543941		437.617	-1.11638		333.97	0.976151		269.412	-0.855554
779	227.277	-0.231008		423.345	1.06066		305.1	0.327568		446.448	-1.26474		235.794	-0.425036		283.403	1.06444
780	359.736	-0.861118		422.143	1.0592		249.589	-1.11521		460.915	-1.24415		231.85	0.345939		390.416	0.963689
781	145.95	-0.639564		172.608	-0.743369		153.963	1.28708		458.193	-1.22664		95.7479	-1.3799		424.828	-1.22412
782	380.515	-0.762344		260.742	1.36699		202.329	-0.0137182		451.881	-1.31403		188.475	0.523569		212.919	0.90215
783	247.027	-0.552023		353.646	1.01872		298.509	0.687654		442.612	-1.33126		119.557	0.721103		445.105	-0.584033
784	177.168	-0.199457		213.085	0.438341		222.539	0.126698		432.412	-1.16059		296.898	-0.204646		411.711	-0.791369
785	351.895	-0.754869		251.567	0.471341		247.408	-1.50712		397.767	-1.27178		385.432	0.138485		387.294	-1.21438
786	293.647	-1.51046		246.716	0.426683		345.235	-0.600022		448.516	-1.15663		319.773	0.645343		231.357	-0.253327
787	219.196	0.745925		153.229	0.239249		221.856	-1.13887		459.878	-1.295		270.865	1.5708		442.398	0.402648
788	305.703	-0.622971		228.306	-0.535549		278.268	1.01889		475.977	-1.25552		277.547	0.170931		326.089	-0.612429
789	280.695	0.293672		281.523	-0.340147		303.447	-0.949113		476.668	-1.29268		331.357	0.482878		215.382	-1.51938
790	275.907	0.783567		297.114	0.75238		306.62	0.107721		468.3	-1.3936		225.377	0.186695		293.803	-0.83091
791	100.554	-1.1908		246.477	1.01041		167.846	1.03844		458.891	-1.23618		158.208	0.381507		517.276	0.882654
792	323.675	-0.718457		300.408	0.953425		258.721	0.42995		443.39	-1.27428		291.788	0.399947		140.446	1.11649
793	314.87	0.378666		297.6	-0.0197643		225.53	-1.0366		449.572	-1.40687		354.808	0.169016		125.604	-1.5708
794	221.49	-0.133879		285.86	-1.04615		248.163	0.878578		436.261	-1.35945		295.774	0.33449		285.053	-1.00566
795	236.313	0.703411		327.923	-0.0565605		294.062	0.602075		422.616	-1.15114		185.212	-0.915426		153.483	-0.525051
796	141.74	0.368476		277.34	0.278668		282.505	-0.4967		447.44	-1.28628		249.838	1.08195		313.528	-0.00341634
797	297.156	-0.920912		204.226	0.369628		256.889	0.412179		467.583	-1.32182		255.054	0.215903		424.213	0.809544
798	259.301	-1.26404		500.322	1.15172		277.699	-0.42427		495.293	-1.31576		307.717	0.389631		261.008	1.5708
799	239.622	-0.85748		480.213	1.09291		202.675	-0.723044		417.581	-1.22054		268.915	0.969118		322.893	-0.903213
800	184.706	0.294385		453.946	1.05688		210.549	-0.563002		403.982	-1.24207		251.065	0.971132		299.187	-0.428374
801	316.842	-0.853654		432.898	1.05528		178.298	0.934079		431.886	-1.1579		348.154	-1.0193		394.5	-0.463387
802	296.152	-0.29224		456.194	1.09688		289.486	0.65274		465.918	-1.29113		202.39	0.803691		411.073	1.46988
803	246.477	-0.780263		449.597	1.15141		154.073	-0.6684		432.267	-1.19591		214.705	0.350388		421.083	-0.4776
804	241.415	-0.827294		504.291	1.11608		235.786	0.634608		474.709	-1.40121		319.096	0.409991		302.801	-1.07907
805	239.659	-1.09605		434.571	1.09787		335.807	-1.21218		434.954	-1.16213		275.882	0.429317		321.485	-0.66906
806	290.547	0.803226		475.202	1.15085		240.432	1.30297		445.676	-1.27587		317.206	0.249698		259.532	-0.83552
807	248.652	-0.957099		434.088	1.04381		145.002	0.399563		499.53	-1.29734		343.316	0.771576		280.646	-0.425826
808	386.26	-0.991231		473.697	1.04466		374.422	1.40188		441.261	-1.15822		315.706	0.65758		238.642	-1.52023
809	313.517	-1.45266		459.223	1.07482		397.388	0.362535		186.775	1.26905		226.751	0.18867		481.177	0.71786
810	197.568	1.30708		436.689	0.980942		176.653	-0.849934		292.447	-1.37061		101.792	0.288184		383.289	1.02756
811	203.766	0.562196		406.375	0.997055		382.651	0.558059		94.81	-0.903132		180.26	0.466123		334.846	-1.20849
812	295.73	-0.78455		440.718	0.94342		301.818	-0.579873		407.944	-0.38203		247.688	1.31018		348.08	-0.480599
813	292.61	1.47648		483.863	1.04475		368.731	-0.423487		463.624	-1.21275		147.36	0.418238		307.25	-0.976404
814	381.51	-1.49466		448.863	1.09634		254.101	0.698491		458.391	-1.23258		198.801	-0.94802		327.649	-1.15881
815	236.176	-0.533041		503.872	1.00613		214.287	-0.159003		477.143	-1.25002		264.054	1.56621		282.862	-0.832656
816	237.541	-1.04714		450.628	1.07865		165.377	-0.729795		468.764	-1.23507		317.259	0.163408		327.647	-0.153611
817	211.098	-0.842498		462.829	1.14355		402.856	0.199367		511.778	-1.23334		155.051	0.712878		226.069	-1.33115
818	170.005	0.712911		480.154	1.14976		207.235	1.15511		408.053	-1.08941		174.593	0.297824		324.217	-0.0666292
819	367.75	-0.481697		441.395	1.08449		263.827	-0.896874		455.753	-1.22084		238.784	0.0824286		270.724	-0.395699
820	492.37	-0.289668		479.752	1.07689		447.126	-1.35811		475.505	-1.26617		136.414	-0.698633		291.624	0.838614
821	190.007	0.876524		453.279	1.11777		347.165	-1.5708		416.158	-1.30364		340.967	0.550694		229.013	0.290966
822	165.422	1.12203		464.305	1.06337		273.114	1.51448		456.013	-1.3167		199.301	-1.5708		278.777	-1.45175
823	212.643	-0.136679		514.989	1.13639		222.013	-0.000798431		467.357	-1.31574		168.426	0.733136		264.853	-0.57984
824	273.607	-0.902068		441.302	1.10766		238.059	-1.53623		429.511	-1.12084		292.645	0.564677		412.855	-0.284988
825	193.897	-0.545163		456.708	1.05079		276.085	1.46308		371.96	-1.18844		100.313	-0.340994		142.488	-0.795095
826	276.671	-1.01846		440.706	1.09826		308.014	0.746699		306.415	-0.911143		139.797	-0.688618		284.338	-1.20003
827	319.838	0.996832		433.995	1.01398		265.989	-1.50015		319.242	-0.0183085		257.025	-0.944301		405.607	-0.671916
828	374.681	-0.245941		476.593	1.11465		185.874	0.931848		388.036	-0.489614		309.038	-1.46766		406.9	-0.727343
829	408.019	0.0391695		441.411	1.083		218.385	0.551125		265.353	-0.157048		293.897	-0.683568		141.93	-0.230868
830	298.194	1.38225		418.884	1.14002		378.198	-0.223221		357.062	-0.881388		244.326	-1.33634		163.575	-0.845411
831	217.252	-0.394871		447.784	1.06979		250.089	-0.283841		252.744	0.596511		237.331	-0.637726		224.814	-1.31999
832	294.927	0.815764		448.628	1.0826		323.246	-1.25454		341.438	-0.447959		210.224	0.73314		203.31	0.889508
833	233.46	0.352909		476.748	1.10858		199.43	0.66171		244.331	-0.137001		356.312	-1.50931		304.491	0.977741
834	363.326	0.226884		452.809	1.04148		473.069	1.26458		381.419	1.2265		254.491	1.27796		298.464	-1.20235
835	222.286	0.728583		456.948	1.11329		191.705	0.982681		315.527	0.744623		328.52	-0.847572		349.848	-1.18571
836	317.596	-0.949321		444.97	1.10084		276.616	0.469556		349.347	0.0501438		313.989	-0.912421		369.117	-1.50502
837	280.313	-0.612394		448.227	1.12878		153.846	-1.25033		254.553	-0.333619		410.262	-0.824325		331.398	-0.0577514
838	336.008	-0.737627		451.379	1.09036		209.466	-0.202389		250.541	0.841518		171.269	1.01617		401.786	-0.0719236
839	292.957	-0.506399		483.255	1.06915		334.287	-0.276996		172.695	1.27167		229.908	-1.05641		236.237	-0.385354
840	120.082	0.875743		499.312	1.17006		207.583	-1.3128		337.316	0.729567		293.595	0.449333		244.508	-0.462223
841	308.206	0.534436		459.065	1.06016		197.415	0.835716		228.857	1.05113		133.784	1.21124		431.511	-0.56616
842	347.933	0.287841		427.226	1.16831		347.389	1.38792		371.882	0.579247		272.019	0.0806241		338.189	0.589276
843	329.105	-0.474968		459.82	1.2594		330.349	0.734096		302.088	-1.5708		59.1729	0.0975123		379.427	-0.535817
844	328.731	-0.609419		486.09	1.01277		397.625	0.747827		307.215	-0.542034		194.961	-1.22921		234.524	-1.08414
845	311.66	-0.307347		487.57	1.14472		457.01	1.17829		245.268	0.0190221		355.385	-1.18303		275.38	-1.1834
846	334.258	0.145829		437.518	1.20527		170.742	0.226506		367.114	0.435762		254.101	-1.44141		258.563	-0.208073
847	257.93	-0.209084		483.388	1.0859		174.029	0.683825		185.854	-1.40006		214.714	-1.18108		399.535	0.262762
848	330.806	0.699751		446.299	1.08885		360.384	-0.422136		384.756	-1.39462		128.072	0.922896		486.229	1.42441
849	290.742	0.166806		411.355	1.19816		347.683	-0.403944		306.414	-1.13586		275.382	-1.15954		247.354	1.13729
850	392.781	-0.337452		431.807	1.13792		334.47	-0.33599		378.555	-1.27846		333.436	0.309112		171.221	0.747252
851	324.973	-1.33199		427.11	1.13519		386.727	-0.587075		301.882	-1.03307		279.79	-0.081268		308.712	-0.390035
852	239.099	1.33137		430.146	1.16567		334.93	-0.401761		175.824	-0.372371		291.465	-0.512447		384.332	-0.337896
853	216.316	-0.455554		432.143	1.24516		305.005	-0.16317		335.314	-1.31681		340.702	-0.695562		348.608	-0.293505
854	345.222	-0.604232		400.136	1.11319		330.304	-0.468189		332.548	-1.25742		327.927	-0.544768		256.034	-0.942538
855	354.951	-0.0459737		410.389	1.20591		329.99	-0.57057		483.266	-1.2316		315.32	-0.785653		309.291	0.599714
856	451.662	0.367138		485.139	1.21024		319.076	-0.505482		493.991	-0.630736		204.486	-0.364619		371.471	-0.515146
857	286.561	0.199988		475.662	1.16403		388.449	-0.521375		199.732	0.530201		253.038	-0.447647		153.199	-0.469257
858	363.001	-0.159655		461.29	1.23485		404.509	-0.434197		307.855	0.583152		255.003	-0.975792		169.544	0.00671522
859	291.618	-1.09083		387.168	1.18493		384.378	-0.392653		289.857	0.84731		208.539	-0.192326		426.128	0.228796
860	232.201	-0.832863		450.705	1.1719		349.864	-0.624728		226.78	1.01877		251.129	-0.317378		206.475	-0.943522
861	266.256	0.179682		426.018	1.19951		365.434	-0.331231		274.941	-1.44053		230.46	1.04515		343.606	-0.819875
862	305.08	0.243957		427.408	1.13004		357.655	-0.413569		351.098	-1.40203		258.161	0.798057		368.663	-1.27715
863	231.179	-0.0224291		418.296	1.20911		416.884	-0.291908		344.126	-0.645236		278.453	-0.883367		390.829	-0.647031
864	355.822	-0.709651		459.299	1.16667		417.018	-0.280299		273.636	1.02687		299.635	1.46062		323.141	0.442621
865	249.685	0.372718		451.292	1.04152		446.339	-0.377685		290.874	0.207003		288.179	-1.45244		321.451	-0.655878
866	229.395	-0.966389		446.498	1.13652		419.047	-0.280463		335.775	0.28655		214.435	1.03351		220.04	-0.704648
867	159.869	0.800216		399.808	1.28075		470.797	-0.384107		361.117	0.679048		209.328	0.0868383		226.817	1.07827
868	378.492	-0.575489		310.063	-1.10605		428.201	-0.272626		452.655	0.370039		245.22	-0.716148		320.984	1.02356
869	270.405	-0.0297448		281.886	1.52927		432.977	-0.331272		243.653	0.783416		235.656	0.110878		417.096	-0.510219
870	377.172	-0.0640645		249.56	0.506313		409.67	-0.45117		215.615	-0.334075		201.134	0.878045		585.969	-0.629976
871	190.555	0.190292		305.677	0.362194		443.157	-0.37622		399.248	0.334334		319.825	0.942033		451.551	-0.695665
872	319.257	-0.496213		460.011	-1.33408		442.325	-0.425872		291.107	-1.21879		209.974	0.409166		185.839	1.35041
873	287.011	0.537362		407.397	0.81622		433.492	-0.400936		304.163	0.0895331		123.165	-0.537914		262.403	-0.988208
874	324.113	1.11882		386.046	0.361016		421.983	-0.398836		314.231	0.103674		373.893	0.241102		305.696	-1.19259
875	195.554	-0.932648		343.585	1.01417		451.909	-0.370346		202.71	0.248017		141.401	0.374523		322.297	0.952435
876	483.086	-0.725165		199.797	-1.38492		440.879	-0.329784		310.476	0.0390255		252.142	0.330427		324.625	0.983359
877	392.685	-1.03597		191.467	0.468767		453.054	-0.422762		296.5	0.922682		258.739	-0.0405067		387.784	0.44185
878	313.808	-1.10327		393.349	0.259759		391.484	-0.357991		363.195	0.698795		269.054	0.795591		384.029	-0.874042
879	340.185	-0.498072		320.674	0.841623		447.9	-0.32698		281.376	0.756437		240.689	0.965158		311.641	-0.861025
880	360.701	-0.927239		322.071	0.88526		430.453	-0.463463		273.805	0.67591		231.859	0.771269		345.919	-0.763757
881	351.421	-0.479445		218.312	0.0671627		435.883	-0.2437		213.564	1.45679		399.139	-0.0331247		270.324	-1.0525
882	443.498	0.244775		292.078	0.54582		468.204	-0.343108		337.784	0.438145		334.834	-0.15518		296.495	0.534122
883	190.433	0.914847		350.955	0.812339		448.127	-0.345505		344.584	-1.02718		272.808	-0.0596456		253.577	-1.12853
884	305.994	-0.373314		402.821	0.778182		468.686	-0.305934		254.872	-1.25758		357.028	-0.153844		351.803	-1.49648
885	390.708	-1.09904		122.707	0.246419		464.411	-0.388011		103.539	0.185672		235.8	-0.586147		317.265	-0.1208
886	341.215	-0.795506		216.95	-1.30062		482.274	-0.236453		375.447	0.535108		336.051	-0.245055		296.616	0.193922
887	244.844	-1.53493		304.493	1.11463		451.696	-0.347936		326.949	0.653596		272.277	0.00829614		220.906	0.195207
888	186.854	-0.143072		267.874	-0.756246		474.441	-0.360684		268.458	0.86774		293.16	-1.1545		319.429	-0.662274
889	341.636	1.20007		227.299	-0.500408		455.101	-0.33313		297.858	1.0725		257.226	1.29055		387.645	0.401747
890	292.028	0.673197		325.61	1.20372		416.592	-0.264929		249.083	0.416791		229.305	0.216927		273.589	0.0598431
891	350.175	-0.791239		381.939	1.01132		486.088	-0.317914		318.157	0.799009		162.201	-0.597001		283.334	0.738583
892	301.964	-0.876781		347.266	1.19186		483.98	-0.326795		399.283	0.808879		287.154	-0.968185		190.783	0.449406
893	318.618	1.16056		321.637	-1.56895		475.206	-0.346575		409.213	0.697017		244.724	-0.631547		304.09	1.2024
894	342.091	-1.21474		172.939	-1.02719		485.657	-0.372913		452.905	1.48265		208.371	-0.610541		241.059	0.98855
895	337.746	-0.456546		268.608	-0.801532		509.538	-0.460986		265.144	0.97578		252.655	0.293694		393.375	0.429747
896	403.443	-0.822886		228.305	-1.29785		427.407	-0.390491		299.626	1.16952		324.829	0.306065		321.864	-0.466744
897	123.178	1.25262		374.531	-0.210413		511.524	-0.266189		212.662	1.22089		184.469	1.16694		390.295	-1.11633
898	238.902	-0.0095765		270.916	0.0117301		509.282	-0.353524		311.858	0.671089		220.219	0.862497		349.964	-1.10769
899	310.178	-0.873607		326.733	1.36295		454.276	-0.257018		308.472	0.171465		161.971	1.16204		447.205	-1.08334
900	135.96	0.364785		253.571	-0.0386468		459.645	-0.241825		273.057	1.07234		258.692	-0.228792		296.378	-1.46593
901	262.086	-1.35292		260.405	-1.13091		499.531	-0.37772		233.772	0.52015		254.068	-0.321112		545.468	-1.13461
902	217.699	-0.36891		267.562	0.837389		505.273	-0.249814		289.253	-1.53439		271.317	0.552955		423.097	-1.50991
903	294.328	0.094734		232.876	-1.2711		501.228	-0.340857		310.382	0.551939		130.643	0.62558		178.8	-0.722529
904	237.018	-1.20967		360.527	0.868592		514.228	-0.293233		328.651	1.18307		237.082	0.424151		417.675	-0.749437
905	255.25	-0.80499		274.231	0.675026		533.825	-0.294317		252.072	-1.29397		148.008	-0.684432		346.965	-1.36682
906	143.231	-1.07984		289.867	0.831717		504.208	-0.299403		329.541	1.5708		282.252	0.0345607		493.142	-0.987713
907	191.064	1.2859		419.798	1.09002		494.038	-0.361869		242.669	0.948517		249.41	0.330974		249.558	-1.23735
908	251.087	-0.657673		329.338	-1.1217		493.748	-0.371364		234.878	-0.0296781		231.548	0.764778		258.729	-0.124554
909	229.805	-0.711936		279.681	1.26057		473.175	-0.375219		289.576	-0.835398		307.35	0.606928		270.038	0.0898678
910	284.067	-0.44512		449.708	1.09267		497.521	-0.422052		305.617	1.22064		201.385	1.3507		349.428	0.446029
911	326.409	-0.295777		309.205	0.960721		472.505	-0.319458		335.61	1.21418		211.801	0.0891238		282.226	0.288609
912	392.03	-0.630699		365.958	1.02781		463.768	-0.263708		322.945	0.729479		258.869	0.54835		284.861	-0.0533144
913	161.196	1.46073		231.728	0.814826		474.136	-0.400662		231.82	0.376453		287.555	-0.420261		340.055	-0.499686
914	398.315	0.945589		403.973	0.186358		520.809	-0.296931		278.994	-0.671244		232.528	0.425672		362.486	-0.245297
915	187.243	0.333053		249.48	0.38731		475.502	-0.232307		161.582	-0.0626961		322.765	-0.00585677		201.278	0.464451
916	337.316	-1.097		294.166	-0.881441		450.419	-0.457525		226.199	-0.895388		275.077	0.59131		464.406	0.345952
917	327.185	1.5708		411.886	0.417424		499.309	-0.283058		279.959	1.39565		346.204	0.565797		221.69	1.04332
918	252.64	0.175		338.683	0.48355		476.105	-0.263588		224.296	0.399443		367.539	1.4531		207.027	0.806411
919	218.577	0.66903		316.456	0.972983		500.856	-0.319401		258.175	0.552148		229.275	-0.0797867		106.547	0.340505
920	186.794	-0.43204		290.139	-0.124071		546.85	-0.296777		247.183	-0.849519		250.684	0.95328		249.544	-0.438514
921	224.62	-0.778775		211.318	-0.509663		466.397	-0.285899		187.953	-1.12427		202.352	0.347695		266.175	-0.9687
922	297.936	-0.744586		214.38	0.832878		423.463	-0.302542		258.024	1.3537		170.792	-0.872964		358.555	0.916359
923	221.825	0.739199		260.031	0.551161		479.806	-0.456324		347.739	1.06121		370.103	0.284331		191.007	1.23095
924	343.681	-0.424829		464.777	0.577705		494.5	-0.290293		214.197	-1.44414		287.479	0.130388		346.024	-0.326706
925	184.54	0.590485		268.707	-0.391569		490.281	-0.311914		206.015	0.707762		325.014	0.405073		202.72	0.602355
926	309.903	-0.552076		324.381	-0.64187		530.434	-0.265531		285.608	0.620655		206.688	0.832418		320.439	0.944616
927	331.153	1.36007		244.438	0.175596		481.707	-0.298695		223.256	0.831364		295.498	0.520627		324.811	1.52687
928	311.678	0.517459		210.326	-0.52913		446.505	-0.356409		350.08	1.54985		208.163	-0.487677		305.552	0.611899
929	318.456	0.894295		208.493	0.182935		474.606	-0.327986		369.84	1.27974		370.707	-0.244992		231.167	-1.25683
930	399.294	-0.25513		231.014	-1.16816		461.949	-0.390302		271.276	-1.19677		465.459	-0.131174		301.402	1.39871
931	277.087	-0.207806		366.171	-0.0805546		441.412	-0.380043		200.066	-0.84441		433.469	-0.0927814		446.832	-1.35569
932	231.536	-0.927001		250.944	-1.15258		474.922	-0.273382		199.999	0.677779		313.996	-0.101373		317.983	0.943452
933	348.26	-0.280662		184.768	-0.0674672		497.261	-0.383268		316.957	1.47223		118.003	-1.41445		306.024	-0.424664
934	306.291	-1.37667		387.673	0.638794		541.992	-0.338637		286.155	-1.13586		204.882	-1.1638		211.17	0.104484
935	163.138	-1.10899		206.362	0.40324		543.278	-0.231593		330.363	1.28301		241.75	1.15568		374.621	-0.603548
936	472.97	-1.34926		395.505	0.587563		507.042	-0.193212		285.415	0.202673		214.656	-0.889569		269.352	0.240437
937	268.047	1.16447		384.321	0.706358		528.535	-0.217342		329.172	1.18241		190.92	0.820842		182.07	0.606671
938	252.216	-0.894544		135.816	0.716404		526.194	-0.289359		118.573	1.08452		92.0137	-0.821482		377.61	0.0515153
939	234.787	0.056757		330.018	0.654681		561.947	-0.237539		133.646	-0.160752		293.338	0.921615		306.493	-1.46048
940	176.822	0.448939		291.472	0.502608		570.962	-0.21181		183.853	1.48688		223.733	0.2694		291.185	1.28887
941	340.713	-0.24881		394.403	1.00875		518.07	-0.227546		323.179	0.748568		262.225	-0.831836		386.792	0.582409
942	464.326	-0.0571985		278.803	-0.508701		545.996	-0.251332		252.199	1.43079		284.084	0.629057		251.8	0.599636
943	371.65	-0.383431		352.922	-0.483878		531.022	-0.249094		205.03	0.812176		229.135	0.802283		324.187	-0.445908
944	273.712	-1.12512		226.725	-0.699192		487.622	-0.170071		201.086	1.46132		123.221	0.204771		292.537	-0.863919
945	335.701	-1.00758		251.101	0.104663		350.005	-0.0165519		306.744	0.636808		263.144	0.266484		334.422	-0.984866
946	231.644	1.05437		304.668	1.14967		315.981	-0.0397876		356.099	0.448769		189.617	1.32653		340.53	-0.699567
947	163.575	0.0637963		461.485	1.06217		294.231	-0.743385		127.996	-0.186272		239.229	-0.970744		384.649	-0.531321
948	228.22	-0.490139		401.131	1.00285		109.377	-1.11759		206.769	1.36175		297.31	-1.06395		254.897	1.05625
949	205.122	0.00847507		393.417	1.14829		276.332	-0.945053		93.5719	1.15941		243.476	0.349291		374.327	-0.526139
950	101.389	0.253854		466.197	1.09802		310.403	-1.07532		355.391	1.33862		278.559	1.35414		438.454	-0.729665
951	335.128	0.539904		463.283	1.0831		256.368	1.4247		251.497	0.984865		220.688	0.708827		483.311	-0.16566
952	337.957	-0.503995		421.342	1.09831		359.904	-0.759158		249.913	-1.50055		334.641	0.440005		402.777	-0.249772
953	322.29	0.817143		447.512	1.04516		263.467	1.27745		265.681	0.616342		210.894	0.0877249		431.179	0.465643
954	310.261	-0.651957		454.203	1.14405		217.898	1.09569		341.096	0.937484		169.873	1.14277		244.191	0.666669
955	361.164	-1.02276		463.571	1.03097		515.06	1.17687		295.235	-0.416367		229.25	-0.0163095		279.899	-1.15779
956	329.246	-1.35292		451.309	1.25031		321.731	0.718875		245.144	0.886833		256.951	0.327474		202.618	-0.0688166
957	261.641	-1.11608		433.602	1.06328		242.648	-0.335679		279.242	-1.30339		318.091	1.0195		254.719	-1.39485
958	292.672	0.515414		461.694	1.13035		266.76	0.247308		400.55	0.207297		214.116	-0.45189		325.018	0.403455
959	138.353	0.152345		430.23	1.15335		165.036	-1.20248		253.313	-1.27759		289.08	-1.0045		303.195	-0.172991
960	213.214	-0.334304		515.189	1.24369		295.377	-0.692794		334.889	-1.39134		286.79	0.664467		298.351	-0.387729
961	349.138	-0.840245		470.794	1.10154		478.633	-1.26784		219.304	0.888297		210.188	0.140104		239.333	0.308801
962	362.308	-0.825995		369.632	1.09142		245.903	-1.04001		218.695	1.06257		327.349	0.350989		340.665	0.499199
963	321.282	-0.808281		445.218	1.01822		319.323	-0.466878		247.079	0.498816		386.111	0.206271		323.734	1.19007
964	365.81	-0.413524		487.679	1.09905		277.715	-0.81087		360.005	1.38807		312.316	0.473887		325.637	-0.383938
965	252.968	0.103815		461.982	1.08233		283.667	-0.47345		263.116	0.954694		175.908	0.729434		311.063	-0.918959
966	263.311	-1.32186		449.419	1.09264		290.631	-0.892833		319.713	0.470147		199.975	1.35698		390.302	-0.792531
967	418.989	-0.960083		479.965	1.23795		303.284	-0.0812564		313.404	0.6265		273.266	0.764851		190.394	0.579552
968	383.117	-1.16876		399.589	1.06474		306.036	0.530631		326.73	0.622522		249.82	0.346958		221.353	0.700633
969	328.545	-0.103784		432.98	1.17021		115.331	-0.98172		327.799	-1.55885		265.876	1.28962		163.397	1.21764
970	361.065	-1.12694		437.604	1.11598		288.835	-0.6136		283.774	0.958877		210.764	-0.357384		270.515	0.0195295
971	281.754	-1.55046		426.968	1.00033		284.566	0.460784		295.147	-0.642896		274.192	0.399412		234.919	-0.106305
972	191.775	-0.44785		441.528	1.02668		304.677	0.395323		449.681	-1.40413		314.167	0.793696		370.49	-0.761325
973	391.417	-0.330202		334.704	0.781477		435.283	-0.365705		467.193	-1.13195		359.085	-0.079819		171.49	-1.24116
974	302.861	-0.218304		233.67	-1.28434		268.44	0.9659		428.044	-1.23471		193.042	0.0796869		369.072	-0.0912708
975	261.416	1.04354		298.763	0.797895		351.034	-1.23054		440.873	-1.1454		159.618	0.543381		235.273	0.756878
976	449.388	-0.165599		229.468	0.564361		494.361	-1.06666		440.127	-1.26927		130.216	-1.55379		219.61	-0.455042
977	230.99	-0.41182		206.284	0.48121		300.092	-1.28226		478.183	-1.30072		182.015	0.927546		367.05	-0.599019
978	333.927	-0.325029		264.5	-0.745578		259.33	1.35845		452.184	-1.33938		181.919	0.231392		374.219	-0.719004
979	463.376	0.70597		203.849	-0.703266		296.148	-0.0963181		487.111	-1.33401		259.127	-0.657393		294.826	-1.36435
980	178.128	-0.302218		269.18	-0.483674		251.914	-0.343539		468.18	-1.30298		253.776	-0.772807		362.802	0.933069
981	106.302	1.17497		153.058	0.780321		195.633	-0.5494		438.1	-1.24862		196.777	0.680747		143.201	1.20456
982	304.24	-0.459972		182.321	-1.00428		265.46	0.795553		412.634	-1.30733		335.032	-1.31509		311.098	1.52371
983	355.772	-0.0783122		155.798	-0.411931		391.743	-0.30912		472.504	-1.4109		252.408	0.621497		405.509	-0.343212
984	404.3	0.0583832		192.302	1.22574		230.673	0.242356		448.345	-1.3705		246.557	0.82723		398.625	-0.0872528
985	403.057	-0.896824		273.754	-0.37684		437.355	-0.522339		446.9	-1.1665		240.393	0.339478		197.227	1.55416
986	262.41	-0.402738		249.202	-1.14527		307.946	-1.30853		477.467	-1.30253		248.003	0.619256		410.153	1.30872
987	277.565	-0.528123		347.687	0.938676		206.864	-0.657202		445.437	-1.28759		407.445	0.398447		368.015	1.09571
988	300.222	-0.751548		254.818	0.664619		283.976	-1.09631		489.265	-1.36535		323.284	-0.0924058		347.245	0.606626
989	233.121	-0.675802		241.424	1.01531		240.832	0.57458		479.576	-1.3174		328.527	0.0800677		357.056	0.635252
990	228.939	-0.352119		269.445	1.17724		361.895	-0.636502		446.71	-1.42397		293.032	0.112435		391.007	0.219429
991	350.422	-0.73865		327.235	1.47432		172.209	0.672758		476.041	-1.30421		339.567	0.108537		418.847	-0.118735
992	326.639	-1.47258		334.218	1.4902		271.306	0.153001		479.053	-1.21293		401.019	0.121146		472.702	-0.734063
993	239.29	0.469613		365.757	1.07739		223.119	0.136443		437.515	-1.30318		346.297	0.131792		438.394	-1.04447
994	350.913	-0.817252		299.295	1.5699		326.834	0.331852		450.014	-1.3355		318.745	0.142567		190.755	-1.3916
995	280.931	1.22407		190.936	-1.15402		211.999	-0.309474		431.074	-1.27727		410.239	-0.135316		393.43	-1.18188
996	249.3	1.24356		313.024	0.729282		168.063	-0.444762		431.756	-1.30766		393.2	-0.174583		339.403	-1.41129
997	122.254	-0.016939		325.707	0.557793		190.219	-1.5708		477.653	-1.32394		430.931	-0.0162361		329.626	-0.382055
998	255.064	0.396243		295.449	0.872718		219.28	-0.797781		420.794	-1.36648		484.936	-0.0436882		269.217	-0.288173
999	210.8	0.232791		314.612	0.154457		311.47	-0.924392		449.787	-1.30467		424.772	0.150046		489.477	0.481248
1000	386.454	-0.236789		200.527	0.246322		316.644	-1.13096		466.895	-1.22663		430.914	0.0513099		288.33	0.163995
1001	441.377	-0.545767		214.377	1.089		194.831	1.01267		382.236	-1.29683		415.48	0.0271149		320.718	-0.684583
1002	312.266	-0.891645		409.112	1.5708		209.531	-1.19102		423.989	-1.35802		418.823	0.0916926		290.862	-1.48047
1003	385.562	-0.878135		335.682	1.04696		88.1285	0.489014		198.435	0.649949		441.823	-0.0948667		380.602	1.0507
1004	265.12	0.493244		419.963	1.32345		231.034	-0.696142		376.948	0.986068		449.492	-0.154714		269.164	0.0505709
1005	359.404	0.678338		60.2824	-0.765161		88.7318	-0.0739284		377.775	0.636697		441.137	-0.318782		492.981	-0.625046
1006	279.505	-0.707968		332.399	-0.134248		342.012	-0.220716		285.674	0.880069		466.256	-0.0714911		179.753	0.878312
1007	333.349	-0.683014		322.071	1.0728		145.536	1.4241		350.737	1.5411		416.916	-0.262311		316.14	-0.513909
1008	316.616	-0.462487		206.457	-0.274104		371.483	0.482749		310.886	1.41203		458.572	-0.217766		337.202	-1.19888
1009	267.319	-0.823828		335.48	-0.432193		362.845	0.51053		217.102	0.274688		436.645	-0.10956		324.05	1.38532
1010	411.195	-0.740013		244.716	-0.790116		344.702	0.335568		172.171	-1.31802		483.132	-0.133775		235.636	1.13814
1011	267.245	-1.5708		310.044	1.18404		374.267	-1.48329		186.278	0.952832		521.032	-0.172056		262.283	0.639831
1012	375.396	-0.879314		381.01	-0.437989		114.532	-1.36295		517.664	0.264966		483.755	-0.226133		292.47	0.244237
1013	123.591	1.48976		294.516	-0.0842396		244.556	-0.265322		273.998	0.617446		545.102	-0.17149		460.895	1.20673
1014	195.761	-1.47129		372.073	0.0981305		96.1195	-0.951652		313.241	1.15902		630.6	-0.216948		282.676	-1.49992
1015	204.352	0.570713		340.039	0.847757		200.466	-0.220098		349.506	0.792345		518.407	-0.233006		241.554	0.0528274
1016	184.459	-0.363796		330.424	0.92243		229.539	0.967419		395.897	1.1542		542.667	-0.198852		248.242	-0.892097
1017	161.565	-1.05162		370.739	-0.0317325		204.902	-1.27694		217.424	0.680374		572.879	-0.247292		316.082	-0.522336
1018	186.342	-0.207774		341.235	-0.759615		150.09	0.455131		149.508	1.21722		536.27	-0.18794		285.087	0.574395
1019	396.314	-0.717556		311.974	1.2547		280.922	-0.0546203		194.004	1.39877		530.496	-0.198095		376.453	-0.429426
1020	239.668	-1.10321		257.578	-1.39846		229.254	0.816884		351.229	1.10682		549.465	-0.198741		349.883	-0.848658
1021	185.119	-0.875272		329.465	-0.959244		287.324	-0.068179		300.716	-1.50504		561.091	-0.179136		126.174	1.26659
1022	185.962	0.107342		336.346	0.368373		171.889	0.86512		260.172	0.321268		545.001	-0.151505		232.905	0.821883
1023	136.489	0.400422		299.984	0.878247		269.85	0.214286		352.689	1.30724		521.834	-0.136494		283.272	1.04936
1024	262.308	-0.704599		278.175	1.2962		214.213	0.928163		417.21	1.06631		469.989	-0.110327		233.508	1.15874
1025	295.165	-1.01438		259.164	1.08692		249.635	0.507048		247.364	0.566722		431.164	-0.00745326		163.326	1.142
1026	276.586	-0.545652		159.932	-1.30338		284.336	0.957869		178.146	-0.733584		510.023	0.00272243		356.316	0.871357
1027	183.26	-0.539721		195.669	-0.574326		335.633	1.52455		308.229	0.365051		493.965	-0.186005		421.182	0.915151
1028	195.635	0.742248		334.387	0.566279		156.449	0.168785		221.607	0.403686		272.126	0.164892		268.288	-1.2703
1029	223.937	0.455489		386.947	0.453121		427.212	-0.641841		248.706	1.07329		331.725	0.987198		396.615	0.595745
1030	181.134	-0.222941		321.636	0.235789		307.047	-0.980023		219.179	-0.390515		406.14	0.820157		266.866	-1.51241
1031	281.09	0.164786		286.176	0.308142		222.928	-0.106534		279.968	0.877799		381.564	0.657478		412.324	-0.504903
1032	296.645	0.149146		160.34	1.15465		132.018	1.16157		355.58	0.957204		399.926	0.568053		146.373	-0.877398
1033	347.507	0.85119		297.2	-0.894979		359.638	0.260711		185.022	0.260193		438.077	0.49576		250.142	0.323218
1034	188.299	1.08677		228.363	1.32504		338.888	-0.620728		402.917	-1.54181		428.427	0.398399		265.174	-0.956272
1035	202.569	0.0279428		338.37	-0.0729244		227.622	-0.402531		378.66	1.36059		512.303	0.494939		295.709	0.772171
1036	379.928	-0.606769		327.969	1.13598		345.53	0.381451		329.725	1.43303		489.838	0.358271		339.268	0.449916
1037	523.629	-0.495417		433.508	0.529939		276.691	0.245478		146.716	0.51724		527.894	0.324362		271.977	-0.534279
1038	183.744	0.72728		203.626	-1.51876		226.597	-0.517742		257.947	1.33735		473.703	0.325462		293.807	-1.33131
1039	274.514	0.601644		352.145	-0.104209		235.93	-0.572297		450.479	1.20578		496.361	0.383716		448.04	-0.762867
1040	268.433	-0.124571		313.282	0.3146		279.22	0.0525229		274.207	1.49931		525.371	0.405242		337.026	-0.746487
1041	225.448	-0.255761		273.469	0.524537		289.527	-0.348136		373.527	0.734219		528.028	0.402382		309.896	0.800636
1042	361.775	0.269842		274.643	0.0181757		372.873	0.0463984		284.567	0.277246		548.983	0.443674		236.242	0.643055
1043	147.758	0.477269		295.89	-1.38204		379.118	-0.0820424		231.279	-1.51941		515.874	0.439057		133.706	0.403464
1044	401.719	0.190468		237.088	-1.46834		434.505	-0.163053		242.904	1.37143		510.173	0.481061		340.764	-0.824802
1045	220.373	-0.301116		478.32	0.757116		399.327	-0.0788303		451.13	0.695857		500.43	0.373011		390.186	-1.13881
1046	234.031	-0.557165		307.263	1.28683		429.843	-0.0965859		363.002	0.997506		537.108	0.409018		302.12	0.965905
1047	294.246	0.45728		244.185	1.16294		488.012	-0.240926		316.49	0.786168		500.553	0.403572		390.677	0.841058
1048	216.051	-0.168341		252.503	0.123857		485.621	-0.0831687		338.572	0.730667		476.994	0.416337		348.723	-1.26324
1049	413.352	-0.0784285		358.056	1.19923		495.686	-0.0606531		172.602	1.28126		488.135	0.447682		261.933	0.716955
1050	278.798	-0.350953		317.241	1.03379		485.405	0.034162		197.926	-0.350978		553.825	0.403304		538.558	-1.57078
1051	352.122	-0.838732		264.84	0.904024		560.462	-0.0427212		308.002	0.847552		610.336	0.372958		218.084	1.02111
1052	295.535	0.673194		340.747	1.25396		497.622	0.155569		395.679	-1.42171		567.722	0.360367		161.38	-0.557476
1053	400.546	-1.25527		215.248	1.481		296.424	0.865261		418.82	-1.34115		510.15	0.344238		414.346	-1.24965
1054	242.461	0.403891		319.641	-0.126247		307.551	0.282085		456.49	-1.37446		493.927	0.511902		303.42	-0.611445
1055	328.829	-0.526699		372.454	1.13832		358.061	0.346724		353.124	-1.23863		482.056	0.479332		309.231	-1.17899
1056	263.862	-1.12133		261.14	0.225104		173.315	-1.53018		471.73	-1.39178		514.98	0.440544		360.739	1.21152
1057	239.839	-1.33475		334.947	-0.308541		294.077	1.26156		399.73	-1.21219		527.734	0.367783		387.939	-1.02287
1058	301.782	0.800476		187.019	0.49795		272.018	0.444539		419.414	-1.29888		495.434	0.389713		273.309	0.750508
1059	321.314	1.50044		343.764	0.190009		335.547	0.740877		465.916	-1.46305		510.656	0.426645		229.08	0.049815
1060	253.648	-0.473224		165.266	0.854578		249.332	0.341304		424.784	-1.41815		472.313	0.480777		248.065	1.28847
1061	332.301	-0.240705		389.915	0.0538226		358.745	-1.31067		445.812	-1.36996		507.51	0.39801		374.232	-1.46979
1062	294.459	-0.814568		288.111	-0.292641		313.331	-0.37398		398.964	-1.29688		579.606	0.345857		149.084	-1.3703
1063	239.699	-0.809442		195.372	-1.43065		254.174	0.276615		432.438	-1.47063		461.406	0.319031		143.731	1.06286
1064	288.849	1.27035		335.925	-1.38941		234.073	1.14898		461.649	-1.36204		537.422	0.391481		378.482	0.24414
1065	304.718	-1.11994		142.645	-0.143387		246.26	0.233149		473.634	-1.36551		511.179	0.366882		543.333	-0.0728614
1066	227.897	0.322043		254.081	0.596483		202.661	-0.229549		429.989	-1.38493		497.197	0.449419		361.964	0.786586
1067	217.703	0.879382		367.134	0.05834		320.758	0.675838		448.827	-1.33664		504.735	0.330644		325.731	0.0269405
1068	277.223	-0.176977		382.8	-0.133387		394.275	0.324474		405.484	-1.18963		497.126	0.372851		335.81	-1.46685
1069	493.401	-0.0472692		321.308	0.910652		122.049	-0.0609571		406.621	-1.29543		502.61	0.416173		466.837	1.44057
1070	280.845	1.29446		297.478	-0.921539		145.354	-0.0396452		461.379	-1.36247		547.765	0.377398		340.688	-0.43734
1071	314.18	0.0113747		407.655	0.835675		309.817	-0.986245		411.477	-1.38767		547.93	0.405885		280.427	-0.110329
1072	210.619	0.693059		238.147	0.92383		229.357	0.16017		200.725	-1.41851		597.603	0.383293		250.691	-1.06543
1073	219.941	-0.447631		308.634	0.330581		262.96	1.54338		325.804	1.36879		630.12	0.34876		237.713	-0.295556
1074	267.788	0.85342		307.158	-0.407463		300.763	-0.520196		423.087	1.33356		531.581	0.262584		314.026	1.39791
1075	360.308	1.34745		202.351	0.844393		461.903	-0.0891278		270.763	-1.33361		512.531	0.366165		199.685	0.338155
1076	287.487	-1.03943		242.425	-0.308833		286.034	0.0173018		234.672	1.27276		467.403	0.333315		416.989	-0.778426
1077	218.339	-1.15762		415.52	0.601632		291.295	0.396127		217.882	1.23376		549.482	0.439531		370.145	1.5708
1078	200.212	1.56748		319.967	0.612973		429.469	-1.33898		336.777	0.632287		493.5	0.487033		257.077	0.55762
1079	380.745	-0.251139		283.123	0.547207		391.517	0.384955		357.344	0.282294		338.504	0.647354		372.403	1.03689
1080	242.37	-1.53762		349.695	-1.38831		165.676	0.506621		165.56	-1.507		308.314	-0.0417426		385.135	1.23337
1081	172.335	0.514051		156.138	1.19983		223.605	-1.44272		271.077	-1.00579		119.105	-0.625		315.122	1.06149
1082	233.046	-1.07689		404.084	0.717746		219.712	-0.280993		125.697	-0.185047		216.381	-1.07823		308.543	1.06558
1083	215.691	1.37606		149.183	1.02186		280.022	-0.995637		221.049	0.969926		123.694	0.0357643		381.563	1.0874
1084	233.18	-0.562449		180.329	1.52419		214.931	0.299824		180.336	1.45242		256.192	-0.302294		350.88	1.17432
1085	318.735	-0.104528		264.99	-0.652125		202.247	0.381399		324.883	-1.44473		293.078	0.648753		323.243	1.20708
1086	375.389	-0.507415		249.477	0.873045		257.236	-1.04756		454.046	0.823701		209.296	1.02917		369.818	1.15235
1087	292.756	0.840589		164.284	-0.612828		162.375	0.441336		282.845	0.324513		235.217	0.871579		255.708	1.28103
1088	320.105	1.34585		255.079	0.659932		286.732	0.92279		421.306	0.544268		262.442	0.574835		396.073	1.23651
1089	208.883	0.977684		273.259	1.47047		183.233	-1.47889		199.013	-0.0523373		278.717	-1.3315		419.552	1.21167
1090	283.285	0.599995		237.978	-0.935677		219.171	1.05588		194.264	-0.278222		272.537	0.575982		423.275	0.994891
1091	191.996	0.290172		331.776	1.29597		314.274	0.630323		262.089	0.855016		352.063	-0.584492		372.592	1.06329
1092	209.714	1.42489		233.444	0.281414		323.617	-0.917967		417.955	1.01836		151.309	0.285302		361.731	1.16856
1093	397.898	0.663427		274.645	1.49837		384.525	1.02287		422.454	0.831625		108.569	-1.26381		310.586	1.215
1094	386.203	-0.693572		127.713	0.323261		333.989	0.189736		270.034	0.751694		162.946	-0.108071		230.369	1.12144
1095	434.947	-0.710344		236.857	-0.0840052		303.91	0.882863		378.412	-1.39109		231.263	1.13357		229.064	1.48134
1096	316.729	-0.595422		310.976	1.02733		320.492	0.897278		343.381	-1.44755		287.215	1.03844		423.257	-1.2948
1097	397.547	-0.595265		236.445	0.724246		256.26	-0.533964		251.779	-1.14726		227.313	1.30646		310.473	1.23826
1098	324.525	-0.0555307		441.431	1.18252		479.347	-0.225833		221.168	-1.3522		185.042	1.42791		91.9169	-0.149605
1099	183.16	0.654575		478.529	1.20157		293.539	0.672377		170.457	0.0457384		300.261	1.54288		390.434	-0.602449
1100	245.531	-0.674496		484.647	1.05716		368.692	-1.01602		297.805	-1.01125		167.887	0.942906		342.617	0.256095
1101	333.037	-0.479613		425.267	1.12518		297.766	0.88189		264.462	-0.4629		208.926	1.12386		298.946	0.48198
1102	182.904	1.04318		449.082	1.0346		377.465	1.34885		147.034	-1.52932		161.908	-0.986513		202.731	0.711689
1103	209.084	1.54901		413.622	1.13891		277.261	0.428871		380.187	0.749328		283.969	1.098		193.377	-0.377807
1104	226.833	1.15119		416.568	1.15878		304.776	-0.497152		381.332	0.774374		150.698	-0.0427961		203.555	-1.324
1105	227.77	1.00472		435.349	1.05361		289.988	-1.26838		209	1.02491		334.279	0.453127		233.843	-0.355407
1106	285.132	-0.576055		458.727	1.17437		325.949	-0.0730975		252.645	0.82773		376.691	0.171138		282.514	-1.22006
1107	194.474	-1.16742		460.985	1.09918		211.961	0.083314		227.467	1.32739		236.819	-0.562007		515.512	-0.585934
1108	320.946	-0.50087		469.282	1.14697		109.874	-0.0485184		354.409	1.10336		288.616	0.736058		231.749	-0.413847
1109	333.315	-0.883016		454.627	1.09972		283.287	0.985944		368.592	1.06211		147.766	-0.0463436		236.449	1.48269
1110	229.863	-0.700103		421.825	1.11294		208.467	1.24452		165.348	0.189188		244.146	-0.82776		304.749	1.41342
1111	140.346	-0.618154		433.95	1.14412		281.98	0.960101		225.856	0.551315		176.46	0.362643		467.48	-1.5708
1112	259.793	-0.835386		472.938	1.15595		322.653	0.93305		447.23	-1.52884		258.146	0.994339		361.441	1.5708
1113	328.219	-1.21005		476.374	1.07908		292.963	-1.36527		331.185	1.2992		311.863	0.254183		280.215	-0.670825
1114	211.065	-0.615828		489.637	1.17994		288.558	0.191204		478.769	1.16356		160.613	0.702179		336.315	-0.755547
1115	275.003	-0.703526		478.893	1.07939		165.629	-0.598903		362.737	1.11816		309.978	-0.0751644		285.676	-1.5708
1116	224.088	-0.870237		469.956	1.18457		287.231	-0.953706		235.442	-0.929052		242.617	0.780447		377.839	0.586921
1117	343.648	-0.731758		442.142	1.15103		302.338	-0.38099		283.004	0.969302		274.718	0.994952		263.72	-0.304277
1118	242.655	-0.125383		440.603	1.13445		359.725	0.793938		293.844	0.677139		192.901	-1.38015		411.036	0.0233867
1119	336.163	-0.612863		455.678	1.10153		142.267	-0.358523		373.094	0.79304		158.901	-0.656189		379.199	0.868022
1120	180.196	-0.453175		397.763	1.08942		198.398	-1.0267		227.389	-0.0578696		217.603	-0.565118		311.569	0.466995
1121	302.481	-0.345568		419.548	1.16808		304.39	-0.59447		359.868	0.917065		232.412	0.395025		318.336	-1.04074
1122	326.168	-0.173935		414.084	1.08425		174.155	0.374651		270.463	0.933696		263	1.01278		331.635	0.457713
1123	115.17	-0.0621674		436.224	1.04179		316.147	0.9823		382.035	1.27354		214.829	1.33586		346.609	0.357793
1124	218.202	-0.681197		478.957	1.15832		272.963	1.11993		361.637	1.25765		190.607	0.2708		340.562	0.368596
1125	280.958	1.35552		436.054	1.07223		219.24	0.146617		219.862	0.992356		255.548	-0.744046		264.692	0.619822
1126	359.924	1.33166		478.501	1.08797		380.709	-1.25665		300.589	0.982848		263.573	-0.799911		345.172	-1.37865
1127	272.459	0.725158		480.487	1.08915		356.598	0.201975		229.724	0.329437		249.38	-0.997314		340.29	0.440602
1128	323.651	-1.4768		445.793	1.19103		264.205	-0.694902		204.72	1.19726		202.505	0.494678		243.795	-1.53386
1129	248.963	-1.17293		430.146	1.11491		288.161	-1.13878		167.742	-1.22309		189.647	-1.14099		244.013	1.39565
1130	156.639	-1.31248		474.807	1.10763		266.662	-1.01029		321.921	0.156884		260.017	0.387906		283.437	-0.0813651
1131	360.028	0.031363		441.144	0.99789		364.902	0.0323416		311.918	0.331823		243.83	0.822552		311.413	-1.21563
1132	234.084	-0.855574		505.062	1.12517		258.01	0.0559624		273.19	0.375951		336.165	0.499839		226.053	-0.363444
1133	452.414	-1.15436		479.715	1.03111		354.824	-0.77743		236.854	0.718179		177.636	0.454785		263.813	0.420517
1134	336.307	-0.217056		496.959	1.09774		236.704	-1.50351		231.223	0.594659		308.001	0.4891		299.496	0.999531
1135	244.554	-1.51718		435.671	1.01785		265.755	-0.215781		359.533	-1.54708		310.894	0.209964		210.703	-0.541006
1136	280.54	0.968511		434.493	1.04774		449.506	0.617445		236.676	0.413346		319.026	0.139061		190.244	0.998225
1137	259.246	0.766906		498.885	1.15451		263.215	1.31469		368.043	0.853034		322.525	0.0690518		237.642	-1.31934
1138	284.439	-1.35235		472.157	1.10308		244.488	0.959159		261.535	0.748562		315.244	-0.035446		259.997	-0.613473
1139	323.662	-1.19598		454.223	1.15782		196.704	0.180212		344.127	0.555466		260.951	0.0751295		363.984	1.55277
1140	357.094	0.925197		487.294	1.19966		209.593	0.37429		314.115	-0.0535149		333.553	-0.379532		397.736	-0.943561
1141	332.322	-0.192846		489.965	1.13933		228.156	0.265347		279.414	0.389816		357.327	-0.417658		359.953	-0.972038
1142	241.479	0.327038		431.972	1.11285		269.623	0.25291		334.291	-0.108347		120.552	-1.02173		347.729	0.638408
1143	192.869	1.35027		478.884	1.12072		363.334	-1.07069		321.353	0.98351		244.655	-1.47166		255.616	0.456485
1144	274.376	1.13697		476.917	1.08399		392.977	-0.0776855		151.754	0.485527		270.108	-0.733929		485.664	0.289127
1145	388.894	-0.990179		453.797	1.07173		314.036	0.981958		433.92	0.446159		306.451	-0.604439		251.926	0.739692
1146	238.447	-0.595773		452.217	1.09927		217.4	-0.434429		220.689	0.365261		250.347	0.903749		355.772	-1.49009
1147	298.115	-0.188505		472.268	1.21022		361.734	0.658494		286.236	0.726703		236.253	0.646548		233.15	1.4777
1148	251.293	-1.20234		452.563	1.04383		335.053	-1.39652		180.007	1.04061		238.027	0.641175		349.103	-0.700966
1149	260.965	1.51128		472.441	1.18308		523.258	-1.20835		272.58	0.697214		292.262	0.423358		328.209	-0.543289
1150	278.763	0.606637		459.279	1.06454		424.124	-0.855315		205.804	1.2991		153.73	0.171479		310.387	0.734959
1151	277.717	-1.04957		432.877	1.04972		327.235	-0.399855		139.909	-0.447455		168.483	1.17163		298.08	0.416837
1152	395.932	-0.406685		484.354	1.15483		195.485	-1.23142		464.607	0.0114553		259.617	1.47711		389.488	-0.535509
1153	250.608	-1.09887		458.569	1.06297		232.721	0.679141		426.015	-0.822247		319.184	-0.812526		364.044	0.0943872
1154	275.803	0.0227849		476.304	1.1743		336.977	0.175881		336.764	-0.31871		125.148	0.527984		301.51	-0.056529
1155	397.415	-0.371694		464.352	1.13224		355.107	-0.515613		145.802	-1.21789		186.315	-0.771204		130.417	1.42148
1156	157.016	-1.01263		450.711	1.14546		230.711	1.31491		267.152	1.21887		335.668	-1.00084		265.951	0.641145
1157	326.936	-0.665668		467.391	1.12514		495.825	-0.24031		404.895	0.52852		270.538	-1.55654		341.375	-0.353012
1158	380.313	0.067325		445.701	1.1389		303.29	-0.0404447		284.058	1.26504		250.177	-0.406884		291.412	1.2648
1159	387.38	0.05028		467.096	1.15582		433.028	-1.34177		403.158	0.762267		288.655	0.0607175		432.633	1.32306
1160	328.482	-0.75993		487.535	1.1254		237.834	0.21223		358.253	0.69779		323.135	0.0265538		323.81	-1.4667
1161	327.003	-0.491722		417.233	1.15105		342.971	1.43656		404.131	1.11798		213.307	0.274913		286.465	0.637774
1162	283.3	-0.595075		455.714	1.10107		284.381	-1.04745		297.782	0.600479		298.879	0.343707		303.256	0.473852
1163	448.748	0.554385		434.004	1.11317		248.048	0.0342857		305.46	0.233466		325.16	0.65278		419.54	0.852403
1164	312.511	1.10713		364.265	1.16211		365.014	-0.304424		348.117	0.0774337		335.678	1.28899		411.903	0.910369
1165	204.812	0.405018		246.236	1.53904		369.161	-0.509295		285.543	-0.0411856		259.679	-0.100261		395.375	0.841893
1166	297.462	1.23537		182.589	0.674891		360.263	-0.443778		205.113	1.36645		231.775	-1.01543		373.127	0.88327
1167	460.567	-1.4443		204.993	1.41578		351.754	-0.519958		439.297	-1.28823		265.702	-1.00192		202.979	0.974814
1168	264.135	-0.404724		155.516	0.954206		325.082	-0.26194		446.246	-1.34692		263.809	1.11049		351.795	0.978374
1169	307.506	0.256321		345.708	1.0585		318.021	0.0327055		442.106	-1.36605		109.493	-1.32456		385.442	1.08626
1170	297.333	-0.524927		299.071	0.610807		366.89	0.0336074		466.298	-1.23353		280.838	1.42217		320.069	1.3793
1171	363.704	-1.0362		330.887	0.176877		410.886	-0.068359		400.234	-1.27298		322.089	-0.588996		420.368	1.43618
1172	348.205	-0.524778		271.144	0.0832539		450.606	-0.0578538		364.39	-1.29275		326.722	-0.140412		438.203	1.48821
1173	345.327	-0.924695		360.567	-0.14044		443.899	-0.13761		433.313	-1.29856		361.021	-0.114111		280.962	1.46442
1174	447.365	0.320131		287.141	0.0313779		446.895	-0.122877		462.361	-1.29366		247.545	1.51398		353.464	1.45009
1175	264.218	-0.909464		355.02	0.723341		458.615	-0.131464		500.174	-1.31659		211.682	0.199393		356.197	-1.47433
1176	284.443	-1.5708		357.952	0.920142		423.064	-0.0843067		473.492	-1.22401		242.901	-0.789167		376.822	-1.40236
1177	273.698	-0.383618		235.848	0.523601		429.95	-0.131454		393.552	-1.39089		279.638	0.357627		414.224	-1.40544
1178	233.757	-1.27512		306.681	0.120589		477.153	-0.0917877		431.934	-1.38681		175.236	0.555858		340.858	-1.38043
1179	222.212	0.191473		228.107	-1.05326		414.88	-0.0983318		447.488	-1.19322		167.258	0.117457		382.282	-1.25283
1180	306.589	-0.337166		234.634	1.5708		406.314	-0.116942		434.157	-1.3022		201.022	1.05229		472.44	-1.26615
1181	316.629	-0.602083		250.77	-1.08587		457.228	-0.112352		453.126	-1.21251		325.743	-0.102951		385.77	-1.17646
1182	146.932	0.0593433		266.539	-1.29453		454.46	-0.148228		457.042	-1.30043		282.539	0.514185		361.537	-1.16523
1183	278.954	-0.619917		254.885	0.625229		451.577	-0.178647		440.648	-1.33004		360.604	0.170818		361.006	-1.19441
1184	385.74	-0.766348		283.544	0.559224		462.057	-0.0206352		434.943	-1.29355		400.266	0.0926821		388.836	-1.11004
1185	252.655	-0.584562		287.265	0.190714		432.147	-0.0323382		423.576	-1.35131		307.997	0.0328351		408.971	-1.1605
1186	289.393	-0.106801		284.607	0.429556		456.855	-0.0515171		442.004	-1.35013		368.012	0.238686		402.851	-1.16146
1187	289.581	0.635263		265.566	0.479918		443.234	-0.165048		468.219	-1.20984		368.269	-0.061741		427.208	-1.03539
1188	107.261	0.601344		322.098	0.920096		429.215	-0.17707		437.623	-1.33089		296.955	-0.0757443		430.117	-1.05749
1189	264.356	-0.485722		243.009	0.145177		474.232	-0.139057		477.066	-1.37353		401.37	0.123678		417.588	-1.05924
1190	341.117	-0.898253		347.288	0.56555		467.778	-0.210704		474.191	-1.34163		414.608	0.195129		443.346	-1.00261
1191	233.02	-0.41226		272.28	0.0560622		486.802	-0.14445		478.48	-1.20743		361.988	0.136728		452.147	-0.984307
1192	292.087	-0.0151254		258.18	0.131379		496.626	-0.118141		441.232	-1.27884		325.47	0.100504		444.103	-1.10545
1193	366.826	0.0290785		292.115	0.239927		495.182	-0.117222		460.883	-1.20571		280.99	0.392258		467.716	-1.0613
1194	314.628	-1.17373		256.022	0.396022		463.264	-0.164706		423.45	-1.33332		192.367	0.650657		489.461	-0.992246
1195	220.791	0.385008		291.898	0.622222		488.688	-0.21289		518.237	-1.33339		136.85	-0.474961		471.102	-0.951478
1196	360.891	-0.0254042		231.013	0.843903		495.195	-0.182555		483.124	-1.33549		228.802	0.818619		450.932	-0.904218
1197	373.866	-0.0649695		108.565	0.509638		450.839	-0.167658		293.747	1.44227		214.208	0.101698		470.97	-0.972091
1198	311.824	0.212396		431.644	0.837256		450.397	-0.179043		264.661	0.536225		245.097	0.478024		497.134	-0.980506
1199	341.484	0.167884		268.285	0.454801		452.023	-0.14537		225.327	-1.02018		235.008	0.152557		505.436	-0.953683
1200	297.622	0.0322922		257.616	-1.42338		447.634	-0.111978		298.655	-0.774454		375.297	0.0876515		575.459	-1.02111
1201	271.085	0.182168		176.745	1.41343		465.022	-0.211178		384.504	-1.09929		309.564	0.0809556		505.186	-0.960843
1202	294.47	0.204453		218.728	0.673101		429.602	-0.122738		192.844	0.523243		340.549	-0.222227		481.046	-0.99878
1203	318.375	0.115283		234.123	-0.00416804		450.421	-0.0776251		306.89	-0.549313		403.334	-0.0179654		455.484	-0.853274
1204	365.118	0.0859989		286.058	-1.49535		474.372	-0.0376802		168.246	-0.654562		383.984	-0.0292205		538.707	-1.00502
1205	388.853	0.0531725		341.134	-0.310389		472.284	-0.234773		290.431	1.47685		390.597	0.00730139		505.135	-0.871305
1206	351.124	0.176277		306.28	0.668421		433.97	-0.248637		284.331	0.149435		439.242	-0.198		535.798	-0.896812
1207	374.024	0.156357		265.678	-1.18133		424.126	-0.104082		256.027	0.820461		394.874	-0.23969		483.028	-0.98855
1208	228.716	0.750699		377.323	0.595781		447.665	-0.124271		237.984	1.29096		425.466	-0.221494		500.529	-0.944456
1209	283.725	0.934667		271.048	-1.26064		423.335	-0.0966361		196.705	1.02004		479.532	-0.274305		515.042	-0.930793
1210	235.931	-0.0355488		240.073	-0.448228		408.045	-0.175824		208.14	-1.04764		486.546	-0.248767		509.912	-0.948891
1211	184.628	1.195		282.458	1.39677		455.64	-0.221339		232.636	-0.788795		516.425	-0.186699		477.516	-0.927115
1212	114.766	1.19509		238.879	1.38362		453.49	-0.132065		391.242	0.409045		510.024	-0.179819		527.403	-0.889585
1213	233.293	-0.382574		157.28	-0.930491		418.886	-0.139213		354.784	0.0502353		536.588	-0.121816		525.083	-0.945197
1214	331.48	-0.436637		242.453	0.116036		458.981	-0.103004		228.325	1.04501		456.137	-0.199779		549.377	-0.827307
1215	173.747	0.00507792		313.426	1.07516		462.84	-0.145319		245.831	0.69647		518.384	-0.142904		559.617	-0.922242
1216	213.707	0.522756		120.186	1.18586		444.551	-0.0611891		169.126	0.422615		548.067	-0.256981		560.212	-0.898774
1217	256.312	0.284507		191.383	-0.171711		478.704	-0.0856812		383.456	0.277736		492.863	-0.181903		551.029	-0.848208
1218	492.257	-0.0239944		338.516	-0.155779		521.339	-0.158784		223.884	-1.06543		499.832	-0.135242		502.524	-0.802638
1219	233.727	0.610501		269.574	0.0196049		482.959	-0.178053		234.979	-1.40504		442.413	-0.143385		530.411	-0.851216
1220	357.728	1.1994		290.899	0.953347		544.216	-0.142604		376.801	-0.169606		502.821	-0.259263		522.727	-0.860358
1221	444.328	1.40311		213.357	-0.0899465		492.238	-0.232312		385.093	0.43386		462.864	-0.233726		525.625	-0.759392
1222	176.114	-1.11501		258.609	-0.939481		510.637	-0.158237		366.18	-0.981603		490.788	-0.208459		574.734	-0.89458
1223	311.091	-1.1593		498.366	0.638105		493.22	-0.109539		183.947	1.28079		423.127	0.222582		547.78	-0.839894
1224	304.907	-0.868853		338.945	1.21472		518.104	-0.183621		196.173	0.683465		210.326	1.06318		469.69	-0.956399
1225	336.505	0.894905		283.668	0.839966		484.009	-0.157946		215.319	0.418946		183.265	1.26918		470.351	-0.920055
1226	176.456	0.996834		272.482	0.862599		504.179	-0.110181		283.812	0.625427		293.627	0.570266		525.269	-0.882682
1227	219.81	-0.374063		252.367	1.41615		526.689	-0.206496		181.104	0.964989		276.762	0.621303		497.752	-0.878296
1228	250.135	0.541246		448.556	1.12845		499.717	-0.242494		275.291	1.25219		168.257	1.13021		499.715	-0.967855
1229	240.413	-1.02259		306.124	1.18617		554.005	-0.163524		286.009	-0.573628		106.659	-0.792375		540.986	-0.861756
1230	209.448	0.474821		403.653	-1.49915		498.123	-0.0800594		289.564	1.13451		290.742	-0.228239		546.93	-0.867478
1231	287.694	-1.34654		231.396	1.20157		575.832	-0.14409		406.779	1.46886		192.904	-1.25999		536.95	-0.897462
1232	333.795	-1.20275		308.077	1.54316		554.594	-0.11454		329.079	1.03169		184.236	1.41609		515.331	-0.891725
1233	301.056	1.33303		245.348	1.07535		491.966	-0.243296		311.943	0.00924009		263.086	0.893841		526.781	-0.866873
1234	368.121	-0.392467		335.45	1.09273		523.84	-0.162665		341.348	0.827555		112.257	0.813645		524.856	-0.843036
1235	291.102	1.35344		181.726	1.07696		534.632	-0.180684		245.02	0.956518		277.178	0.677389		467.819	-0.866882
1236	155.618	1.29715		228.156	0.923557		478.731	-0.186564		419.101	0.78352		246.175	-0.257289		493.443	-0.905892
1237	242.102	-0.167909		372.345	1.2905		549.905	-0.177138		244.617	0.591894		286.957	0.0817798		504.295	-0.96083
1238	389.838	-1.06293		306.048	1.00235		498.766	-0.141455		319.219	0.170276		263.693	0.687438		544.912	-0.838787
1239	327.184	-1.39649		342.402	0.681995		464.114	-0.102607		224.892	0.346542		211.401	-1.39341		462.279	-0.868418
1240	231.385	-0.0412883		265.709	0.89012		499.415	-0.188327		319.37	1.37971		229.247	-0.208708		539.873	-0.983271
1241	132.962	-0.607527		291.652	0.622541		498.997	-0.136599		349.154	1.16303		139.712	0.39137		525.323	-0.883601
1242	316	0.0930153		286.676	0.625691		488.795	-0.0969081		305.075	-0.0550193		189.394	-1.49654		549.314	-0.879568
1243	390.103	-0.0213303		244.7	0.626227		484.195	-0.138727		303.198	-0.491603		183.879	-0.710103		505.804	-0.854765
1244	379.331	0.205114		254.963	0.276558		465.998	-0.0640068		159.27	-0.783548		339.218	0.127827		528.995	-0.868953
1245	394.85	0.223732		119.239	-1.01168		506.709	-0.109345		250.104	0.371068		399.477	0.417482		550.978	-0.881922
1246	394.397	0.0642941		175.407	-0.825856		514.152	-0.102826		336.978	1.31691		257.879	0.745204		492.427	-0.903933
1247	402.737	0.00362815		245.073	-0.745332		485.604	-0.0665787		207.028	-0.331843		259.627	0.6526		472.083	-1.0357
1248	313.961	0.220591		178.823	1.36942		516.088	-0.165256		324.563	0.10567		207.316	1.41885		512.256	-0.907113
1249	406.663	0.0184479		204.109	0.875585		529.156	-0.12028		305.062	-0.0127504		231.421	1.00658		501.722	-0.986705
1250	388.086	0.369227		170.113	-1.38809		498.728	-0.0665057		150.871	1.0497		298.914	0.103256		478.691	-0.920482
1251	352.703	0.358524		312.206	0.770261		529.529	-0.140512		481.942	-1.25235		215.304	0.531895		547.197	-0.952006
1252	321.673	0.337064		212.261	1.23534		493.848	-0.239991		231.678	-0.697673		232.807	-0.663333		543.589	-0.889749
1253	345.525	0.3035		210.53	0.22662		491.057	-0.101659		125.738	0.636589		198.873	0.570956		482.618	-0.897002
1254	384.514	0.0167106		146.545	0.34709		481.937	-0.115109		125.501	0.00995916		251.027	0.942469		526.794	-1.01044
1255	337.786	0.156847		224.187	-0.617946		509.303	-0.0734042		386.869	0.790084		177.182	-0.419573		515.506	-0.952883
1256	357.966	0.137392		313.122	1.06425		519.826	-0.132203		456.006	-0.455816		227.571	1.07602		492.391	-0.897599
1257	350.43	0.133034		275.498	-0.624293		466.744	-0.0693684		375.078	1.32297		292.786	-0.0875281		458.045	-0.907242
1258	358.325	0.0573678		311.953	-1.12806		504.565	-0.0805389		231.614	-1.14093		208.961	-1.19799		447.128	-1.00075
1259	362.23	0.302713		104.315	0.887631		476.306	-0.145094		352.794	-0.847168		173.053	0.627981		485.058	-0.919253
1260	459.902	0.155459		338.31	0.199867		489.381	-0.155548		369.952	-1.44505		381.222	0.0912275		464.232	-0.959845
1261	313.704	0.367708		188.634	-0.617292		476.238	-0.0801139		290.568	-1.24921		171.342	-0.148495		506.666	-0.917233
1262	390.769	0.347792		225.93	-0.737035		471.674	-0.104112		467.984	-1.3445		273.293	0.51359		489.851	-1.07162
1263	356.298	0.359711		389.114	-0.856332		484.72	-0.155287		428.429	-1.26387		216.622	0.640651		498.622	-1.00923
1264	398.788	0.249953		251.055	0.204935		480.515	-0.132144		445.065	-1.30461		192.809	-0.0959463		497.875	-0.896824
1265	381.964	0.213397		188.755	0.546834		481.424	-0.327038		450.021	-1.31525		221.999	0.446172		548.683	-0.960786
1266	366.108	0.164786		293.876	0.827548		371.918	-0.0987919		446.91	-1.32109		327.843	0.816583		517.07	-0.83837
1267	302.283	1.08028		251.584	-0.0945575		337.325	-0.946103		393.756	-1.29813		337.723	0.260718		506.758	-0.862102
1268	294.748	-0.219923		287.117	0.478782		196.924	-0.317904		467.859	-1.28167		216.414	0.961651		495.727	-0.948684
1269	288.27	-1.31577		353.18	-0.0746164		401.253	-0.410161		446.444	-1.3192		329.141	-0.378519		500.932	-1.02897
1270	214.779	0.740157		363.448	1.55462		215.315	-0.255016		450.019	-1.21534		351.298	-0.522405		448.687	-0.948553
1271	153.625	0.616593		190.792	-0.0653483		280.217	-1.32307		426.888	-1.12442		309.407	-1.23995		516.56	-0.952303
1272	194.816	-0.168091		276.005	-0.53746		245.224	1.32785		446.08	-1.20911		280.975	1.51789		355.275	-0.829148
1273	449.801	-1.07137		364.218	0.982166		309.996	-0.324545		473.716	-1.26201		297.957	1.23201		359.544	-0.446677
1274	333.22	0.861227		278.775	1.08607		322.208	-1.00397		485.69	-1.3314		231.613	-1.4602		270.853	0.774247
1275	223.362	-0.835674		204.994	0.585242		331.899	-0.947397		465.127	-1.32376		234.513	-0.480237		262.048	-1.39256
1276	352.315	0.72076		236.061	1.31482		213.569	1.20306		426.621	-1.30975		285.543	-1.14818		376.511	-0.754713
1277	233.344	0.741985		316.508	0.385761		247.446	-0.80757		486.053	-1.29935		178.875	-0.399379		355.418	-0.724222
1278	249.576	0.574541		221.355	-0.374725		274.142	0.884595		414.562	-1.1704		363.242	1.5708		364.042	1.07783
1279	365.675	-0.364009		379.064	0.142364		306.374	-0.394748		435.668	-1.28722		214.297	1.07699		333.904	0.322121
1280	207.971	-1.24127		215.192	-0.363774		277.838	0.108338		491.504	-1.2414		244.567	1.29668		331.389	1.193
1281	216.956	0.295891		286.1	0.0325958		404.866	1.01485		439.489	-1.18545		113.174	0.179696		193.278	0.900699
1282	255.224	1.15721		142.214	0.192789		353.844	0.759652		401.88	-1.21791		273.474	-0.0746427		286.369	-1.08127
1283	263.016	-0.125794		261.731	1.16991		315.549	0.637733		447.799	-1.21354		321.554	0.632712		371.902	0.403516
1284	268.083	-0.260183		239.673	0.594368		423.651	0.410789		474.666	-1.18495		247.044	-0.793536		267.591	-1.40337
1285	405.601	1.04276		356.955	1.53547		190.271	-0.570474		435.491	-1.26486		111.225	0.480904		333.192	-0.517855
1286	278.438	-0.778285		348.467	-1.48323		373.311	0.538953		403.934	-1.27994		265.307	1.29388		340.969	-0.976176
1287	284.709	-0.882607		340.725	-0.120872		191.239	0.664525		459.949	-1.3376		204.847	-0.595292		324.313	-1.52796
1288	264.793	-0.25924		275.241	-1.5708		287.483	0.283014		495.828	-1.30372		197.094	0.0557328		287.987	-0.747542
1289	249.762	0.102382		925.849	-0.971595		390.93	0.412705		434.414	-1.19901		163.604	-0.0532027		714.161	-1.5705
1290	410.434	0.828431		121.737	-1.30206		303.921	-0.871038		440.295	-1.26956		225.975	0.478945		264.759	-0.870136
1291	155.906	-0.345192		72.7873	-0.069336		299.329	0.556791		312.909	-0.608085		314.866	1.44277		303.86	-0.557146
1292	316.953	1.27014		325.263	-0.530163		357.438	-0.438497		425.961	-0.244899		278.633	0.806303		370.286	-0.788938
1293	395.226	0.828063		185.323	-0.148153		264.145	-1.0142		264.189	0.664259		155.725	0.53554		293.056	-1.40085
1294	345.858	0.480925		204.466	-0.351929		337.456	-0.53219		256.74	1.10502		223.098	1.0064		351.013	0.451729
1295	347.825	0.49396		314.339	0.194976		305.189	-0.880104		347.538	-0.94757		181.992	-0.67067		380.237	-0.915445
1296	165.366	1.08244		248.069	-1.36229		405.471	-0.271945		321.734	0.746936		219.362	0.199455		291.291	-0.174716
1297	305.108	0.105954		304.716	0.792521		235.851	-1.32702		313.612	-0.510506		231.855	0.0246588		335.035	0.496964
1298	411.443	-0.21662		271.504	-0.598742		72.0813	1.17365		164.592	1.5708		126.911	0.353449		471.764	0.327067
1299	278.287	1.42524		126.051	-1.12064		296.549	-0.847676		265.799	0.193551		240.929	-0.164564		311.251	0.00470348
1300	292.746	-0.617633		249.685	1.48961		241.139	-1.24853		298.864	0.545379		292.27	-0.859867		200.963	-0.685786
1301	226.865	-0.782578		333.612	1.07977		263.887	0.119306		307.617	0.613325		199.669	1.30547		411.618	-0.43136
1302	227.301	0.228859		187.496	1.13153		394.92	0.282225		297.035	0.188988		249.782	-0.987691		366.45	-0.49243
1303	213.717	-0.463298		391.026	0.965059		257.823	-1.11756		330.784	0.430377		231.142	-0.960131		256.958	0.543238
1304	284.7	0.124978		341.916	0.701734		293.582	-1.51422		299.059	1.11471		296.21	0.919595		179.934	0.491096
1305	347.149	-0.771111		375.281	0.676882		215.304	0.270389		517.664	1.4587		236.245	0.0468324		429.186	1.07353
1306	235.504	0.0861747		148.902	1.15017		254.227	0.642218		506.521	1.08532		351.3	0.490401		255.375	-1.08102
1307	145.761	1.3329		371.143	0.606809		335.408	1.49303		278.155	1.39178		264.049	-0.212389		431.129	-0.785757
1308	340.759	0.388193		335.566	0.638804		236.293	-0.0167689		267.506	-0.922191		91.0943	-0.854581		308.842	1.38226
1309	333.907	-0.638803		144.756	-1.35732		276.602	0.0806754		196.514	0.252624		154.431	1.02968		365.149	-1.54757
1310	456.43	-0.100228		222.544	-1.15862		163.653	0.410339		368.542	1.38415		160.979	0.460878		302.151	0.0075066
1311	339.35	-0.817152		265.403	-1.25393		349.639	1.54893		114.499	-1.07114		187.124	0.737931		234.692	0.745222
1312	300.875	-1.28282		124.734	-1.26466		301.467	-0.550917		239.711	1.41284		240.841	-0.449985		349.829	0.0407921
1313	301.273	-1.22358		291.887	0.526181		384.204	1.42449		290.294	1.03123		281.511	-1.24762		394.696	0.340125
1314	192.355	0.989827		202.023	0.944712		230.998	0.631256		124.914	0.249297		250.782	-0.163431		316.395	-0.645806
1315	200.628	0.627689		423.414	-1.1044		308.836	0.250181		298.874	0.60734		344.88	0.36896		440.588	0.192266
1316	184.217	-0.495255		257.993	1.55087		288.77	-0.48537		209.607	-0.694533		159.406	0.583524		379.086	0.126395
1317	194.677	-1.07995		195.564	-0.970102		279	-0.807592		233.78	1.50472		267.319	1.39485		279.886	0.550004
1318	226.558	1.13105		351.045	0.993264		218.675	0.228335		286.505	-1.07641		370.122	1.42148		444.858	0.256934
1319	229.736	-1.13405		286.147	0.955061		275.768	1.32284		222.632	1.17192		300.099	1.52016		483.283	-0.00843458
1320	276.066	-0.731403		150.518	0.902648		226.045	0.100535		324.736	1.09246		217.94	-0.434753		446.082	-1.09892
1321	187.913	0.27096		305.525	0.299832		222.061	-1.24985		317.985	0.0836877		115.674	-1.12711		203.366	0.316924
1322	307.451	1.25544		366.464	0.192946		342.245	1.07577		257.78	1.56612		296.425	0.623844		344.407	1.49267
1323	254.309	1.04405		242.279	-0.402119		339.476	-0.150848		310.775	0.475868		325.404	-0.759161		447.536	-1.35236
1324	289.643	-0.617258		341.923	0.701742		477.997	-0.514329		231.832	1.45173		185.009	-1.48924		279.818	0.00272956
1325	273.782	-0.317857		303.819	0.832473		274.987	-0.79452		386.444	1.18416		347.091	1.4989		390.154	-0.954088
1326	113.956	-1.16983		235.533	1.5708		232.589	1.18896		179.142	0.945239		291.394	0.927074		98.4356	-0.637102
1327	312.059	-0.526583		187.941	-0.185186		295.168	-0.712489		233.252	0.917399		258.56	1.29898		240.241	-0.636743
1328	275.64	-0.40983		281.932	0.35354		203.349	-0.523335		152.128	0.464451		266.657	0.776545		272.102	0.421076
1329	77.0321	-0.260187		163.157	0.843722		341.847	-1.31867		282.212	0.743181		191.909	0.339488		218.962	-0.668145
1330	364.494	-0.271059		312.225	0.566962		171.747	-0.968159		278.695	-0.31642		286.319	0.28852		359.607	-0.560354
1331	202.705	-1.23276		161.147	1.5708		176.435	0.194824		165.437	-1.25082		273.489	0.120807		390.674	-0.0501827
1332	449.075	-0.481669		320.505	0.886095		255.109	-0.168865		212.937	0.723655		93.445	1.22743		376.044	-0.26295
1333	214.382	-0.957298		232.481	0.343028		337.848	-0.264016		224.726	1.43185		213.708	-1.24452		356.512	-0.199641
1334	348.803	0.18235		387.513	1.21021		225.883	0.203407		339.741	0.534402		379.556	-1.53178		478.877	-0.0538801
1335	263.174	-0.185435		434.741	1.13364		247.709	0.389908		285.016	1.52574		186.752	0.149332		384.01	-0.156806
1336	146.345	-1.25022		431.104	1.18298		331.551	0.559241		205.832	-0.194556		198.591	-0.756214		404.222	-0.099366
1337	301.153	-0.151599		387.465	1.2163		259.775	-0.951464		274.322	-0.754525		240.03	0.378708		492.076	-0.0374238
1338	286.43	0.354502		215.155	-1.407		304.652	-0.880111		342.54	1.41216		197.405	-0.172919		422.744	-0.0180828
1339	336.739	0.462981		398.93	0.597275		237.188	0.48991		202.834	-1.30366		277.239	0.412946		444.951	-0.0572841
1340	323.041	-0.58875		243.72	-0.538282		230.481	-0.706002		183.815	1.46815		339.101	0.245815		454.95	-0.129407
1341	164.698	0.327706		110.055	-0.318869		329.968	0.526096		230.244	0.17123		381.202	-0.0463505		503.249	-0.0815866
1342	206.839	-0.64891		241.932	0.326867		240.897	1.29788		272.294	-0.847139		358.119	-0.089973		494.838	-0.0292747
1343	374.936	-0.694343		332.313	0.113407		218.742	0.71622		239.982	-1.06636		457.312	-0.0374008		517.066	-0.0229464
1344	348.83	0.205053		317.082	0.562432		444.985	1.0691		319.638	-1.26615		454.818	-0.121921		500.01	-0.0653682
1345	308.933	0.631529		278.365	0.134694		236.303	0.481358		170.37	1.14898		384.22	-0.255976		473.175	-0.0194085
1346	301.747	0.797658		444.293	0.938711		197.19	0.695515		265.207	1.48822		370.494	-0.0158282		392.035	-0.0561427
1347	251.404	0.680741		230.439	1.17798		344.093	-0.181594		363.213	1.03197		238.32	-1.54368		337.389	0.29771
1348	231.38	-0.94521		199.119	-1.51229		292.284	1.15246		234.386	1.52758		337.309	1.08537		406.132	-0.504562
1349	338.538	-0.0849778		226.66	1.28586		360.536	1.22437		337.558	1.38029		299.635	1.28614		157.114	0.905807
1350	147.617	-1.03109		353.218	-1.19041		365.73	0.252842		237.41	-0.00520824		215.561	-1.18191		248.763	0.400345
1351	271.637	1.18971		298.496	0.4451		329.296	0.480081		221.402	1.37801		241.183	0.257286		477.925	-0.64116
1352	152.847	-1.49515		271.643	0.658591		444.779	-1.31157		279.454	1.28838		322.912	0.270053		385.522	1.00285
1353	308.104	-1.56694		375.473	-0.162871		274.953	-0.134863		343.589	-0.960241		239.804	0.529021		296.098	0.614087
1354	337.881	-1.32367		224.407	0.287586		301.47	-0.800277		277.545	-1.35996		192.344	1.21519		484.218	-0.104021
1355	241.3	-0.391213		193.492	-0.193055		175.335	-1.31409		269.685	-1.19422		101.748	-1.4048		386.797	0.507905
1356	188.157	0.93348		345.229	0.77111		127.732	0.155716		185.231	0.371444		233.638	-0.658914		244.793	-1.43713
1357	265.193	0.395016		237.941	1.38893		231.847	0.471012		205.842	-1.15746		273.361	1.2664		346.976	0.814532
1358	137.963	0.389201		197.027	0.245803		275.241	0.36272		233.101	-1.0373		161.428	1.11434		384.968	1.08991
1359	250.793	-0.859691		299.897	0.780442		271.536	-1.27416		306.328	1.0456		162.305	1.34975		156.017	-1.5708
1360	197.497	0.269251		219.709	-0.153559		365.731	-0.989071		275.61	-1.06631		252.326	-1.49676		269.773	-0.739404
1361	239.159	0.161623		216.436	-0.173612		138.65	-0.989954		238.331	-1.08924		167.721	-1.46513		334.107	-0.54781
1362	348.971	-0.190946		378.447	-1.2509		316.099	-1.03274		168.099	0.111356		265.929	1.2663		290.564	-0.269289
1363	246.543	0.259448		137.367	0.436057		183.512	-0.529037		327.466	0.86338		207.599	-0.678701		226.627	0.528418
1364	276.71	1.39233		306.17	0.331756		101.521	1.18832		266.506	1.13109		291.525	1.08938		297.28	0.203857
1365	375.8	0.624782		242.711	0.589835		195.96	-0.331306		250.617	0.531747		247.935	1.39709		269.997	-0.876242
1366	179.917	-1.31492		311.897	0.352613		255.58	-1.45707		386.311	-0.345465		285.975	1.28915		97.5224	1.38376
1367	197.439	0.527772		252.458	1.20905		264.129	-1.0496		255.729	0.237806		221.205	-0.633655		241.218	0.333515
1368	294.438	0.286425		319.739	1.54162		454.08	-1.05001		279.232	1.06176		323.252	0.449694		403.993	-0.227018
1369	201.586	0.259257		375.766	-0.891408		245.98	-0.566941		328.825	1.04372		352.419	-1.27242		377.392	-0.0549972
1370	195.059	1.43559		239.658	0.736533		263.018	0.683404		239.237	0.113565		323.68	0.174986		181.137	0.427064
1371	317.565	-1.33081		315.765	-1.00836		298.574	0.178783		270.16	0.0670893		321.334	0.278169		374.235	-0.860275
1372	139.89	1.25397		226.829	0.0172611		96.1579	-0.699773		223.257	-1.41846		318.091	-0.483417		299.434	-0.045576
1373	325.584	1.07565		150.423	-0.0711259		307.143	0.776019		149.381	-0.284097		311.614	1.03524		382.275	0.415452
1374	258.995	0.755801		252.033	0.146366		309.964	-0.410211		270.193	0.274544		166.567	0.602832		257.667	1.02218
1375	349.449	0.19951		125.149	0.839134		285.873	-0.412857		252.09	1.35839		241.26	1.19929		190.079	-1.34782
1376	306.832	-1.02719		420.356	1.14001		226.108	0.801869		304.344	0.534858		243.117	0.668339		319.014	-1.42042
1377	292.024	0.00819494		416.38	1.06494		128.208	0.00359832		420.978	1.27893		215.267	-0.644377		256.347	0.524786
1378	312.266	0.0564264		454.555	1.06271		239.107	-0.857952		222.266	0.632603		176.695	-0.22746		264.843	-1.54739
1379	298.865	-0.302888		453.451	1.08938		228.217	0.0995096		298.232	0.545453		304.354	1.0909		462.611	1.06005
1380	152.871	0.959732		444.575	1.10106		272.29	0.486137		259.571	-0.269227		353.871	-1.52727		217.075	0.295385
1381	295.389	-0.407414		457.612	1.06842		297.907	-0.46723		409.285	1.2775		359.401	-0.156722		366.208	-1.30868
1382	154.686	1.48951		472.608	1.1608		314.262	-0.52555		248.022	0.780263		364.72	-0.742921		485.88	-0.351963
1383	440.15	0.0324153		440.287	1.06732		225.994	-0.958388		277.349	-1.28907		277.892	-0.505558		367.345	-1.29974
1384	357.215	0.164123		446.034	1.25094		258.204	-0.161064		415.627	-1.18403		239.172	0.0272101		490.4	-0.404811
1385	230.243	-0.620586		436.783	1.13619		279.753	-0.258099		229.752	0.295279		260.463	-0.846582		290.681	-0.806599
1386	344.639	0.702319		460.23	1.14204		164.507	-0.776768		323.346	-1.45777		175.9	-0.419949		309.335	-0.265037
1387	311.285	1.46827		394.99	1.06325		306.666	-1.03742		170.416	1.45675		227.923	-1.11892		260.223	1.2906
1388	202.016	0.729826		451.214	1.15155		219.85	-0.652155		247.27	0.410748		213.127	-0.279793		214.667	0.710905
1389	171.278	0.334734		444.079	1.09592		226.821	-0.413527		235.808	0.505742		154.283	0.494326		296.072	-0.390349
1390	328.61	1.06401		514.961	1.20058		173.347	-0.432879		275.601	-0.110381		219.928	-0.0847373		221.326	1.19869
1391	278.247	-1.33014		437.839	1.0991		318.217	1.28992		180.162	0.333842		124.281	1.17498		212.966	-0.446673
1392	284.951	0.450686		484.652	1.04471		224.492	-1.5306		270.97	1.47357		194.253	0.792408		417.194	-0.851244
1393	295.767	-0.745568		453.272	1.09974		158.07	-0.379311		124.021	1.1705		298.115	-1.5708		268.833	0.783388
1394	288.472	0.214855		343.397	1.01774		382.87	-0.321352		292.056	1.00281		182.341	0.265442		274.003	0.0238608
1395	425.959	0.0663704		218.802	1.28913		556.948	0.331709		277.614	1.32663		333.758	-0.358013		490.101	0.806721
1396	265.934	-0.895002		286.997	1.25411		272.984	0.839023		210.23	-0.168701		223.147	-0.879398		212.019	0.928219
1397	241.221	-0.524136		177.761	-0.74098		362.068	1.44223		213.891	-0.310873		265.295	1.29426		334.621	-0.924399
1398	187.622	0.340541		168.762	0.527849		318.711	1.42287		351.089	-0.830608		319.228	-1.50823		265.822	-0.750672
1399	333.538	-0.0905481		331.623	1.12521		363.926	-0.905908		327.95	0.536051		321.805	1.03136		355.75	1.06279
1400	252.602	-0.627322		165.862	0.681158		255.459	-0.163295		301.566	-1.24309		298.378	0.552661		277.386	1.20211
1401	264.017	0.802778		255.078	0.595764		432.585	-1.21657		296.024	-0.806802		346.834	-1.54725		240.554	-0.672171
1402	282.492	-0.581414		213.212	-1.12604		391.48	-0.715159		434.981	1.46232		318.069	1.17711		363.509	-1.41462
1403	257.363	-1.34993		277.824	-1.32431		314.685	-0.882921		327.351	1.10544		185.086	-0.244163		98.8102	1.12132
1404	421.538	-0.166343		225.583	-1.1158		131.375	-1.19933		275.683	0.564023		233.469	0.730076		145.045	1.39484
1405	240.569	-0.479873		267.365	0.497105		194.048	1.1592		267.311	0.967805		310.801	1.17992		289.78	0.85102
1406	171.911	-0.0918721		320.184	1.49182		263.867	1.33064		344.896	-1.13526		308.729	0.660324		346.431	0.386918
1407	95.5251	-0.744702		295.27	0.581824		236.182	-0.255003		263.931	1.00131		246.747	0.648898		37.5262	1.27775
1408	390.551	-0.257613		131.898	1.08947		155.404	-1.26877		78.9645	-0.280935		147.072	-1.31002		404.763	0.320307
1409	253.446	-1.06463		172.541	-0.993038		169.729	0.793771		337.236	1.21325		231.469	1.06416		275.136	0.591176
1410	209.049	-0.463165		275.273	-0.860246		205.616	-0.997989		245.533	0.507282		203.493	0.547353		396.058	0.367343
1411	281.598	-0.152993		338.583	0.215189		338.14	-0.606717		209.786	-0.364441		307.193	0.100193		230.088	-0.308794
1412	147.541	1.52335		352.339	0.840612		214.885	-0.773627		202.25	-0.707608		303.915	0.665736		298.624	-0.892116
1413	266.434	0.2821		285.4	0.968719		324.826	-0.362903		253.387	1.00163		373.43	0.452997		249.061	-0.966286
1414	283.897	-0.827556		238.357	-1.23662		245.482	-1.0833		111.702	-0.793941		200.242	-1.2028		153.766	0.0609995
1415	239.495	-0.578024		191.28	-1.35184		235.371	-1.01618		234.189	-0.482239		154.538	0.470132		373.087	0.789576
1416	223.077	-0.298675		312.179	1.54698		433.718	1.29072		297.086	-0.699701		218.256	-0.792967		368.726	-0.839909
1417	396.825	-0.0995807		372.204	-0.793066		225.77	-1.3257		169.58	-0.707177		349.571	-1.17192		375.533	-0.860063
1418	246.857	0.320078		316.586	-0.784663		233.455	0.953451		98.4344	0.218864		266.557	1.23113		279.959	1.11345
1419	295.527	-0.212045		290.919	-1.07682		338.382	0.094583		325.516	0.516508		156.723	-1.32948		283.749	-0.871551
1420	244.325	-0.305337		265.77	-0.436037		366.317	-1.55756		293.568	0.933261		277.732	0.780267		331.038	0.325273
1421	223.847	0.830464		350.035	-0.972979		230.072	-0.219314		248.325	-1.03766		204.906	-1.56393		332.72	1.13076
1422	353.883	-1.12936		300.952	-1.39706		330.471	-0.956739		253.479	-1.37222		358.588	0.217262		266.532	1.17965
1423	132.249	-0.428232		144.507	-0.0675384		186.349	0.262243		186.97	1.28743		344.279	0.895593		368.948	-0.269645
1424	152.014	-1.44268		182.796	0.751688		316.983	0.064862		315.302	-1.56446		256.751	0.324785		342.63	-0.618205
1425	263.504	0.850414		242.282	0.855305		265.737	0.158576		344.949	1.17846		173.577	-0.468796		362.781	-0.674004
1426	354.415	-0.0764673		177.216	-1.43516		308.741	-0.214426		153.828	-1.45347		284.645	-1.32597		236.736	0.0211127
1427	351.817	-0.573923		278.413	-0.879977		213.546	1.43946		305.876	1.00815		129.098	-0.583441		207.379	-0.718201
1428	355.922	-0.407949		405.021	0.786243		198.667	1.02862		89.351	0.454466		265.426	-0.221949		371.521	-0.205177
1429	250.38	-0.580756		467.662	0.653742		207.219	-0.394342		222.224	1.34377		263.177	0.729399		265.781	-0.0400582
1430	242.014	-1.39326		94.1953	0.178486		259.809	1.12289		238.955	1.23682		294.94	1.35143		304.885	-0.926819
1431	373.702	-0.719327		255.809	0.129222		289.43	-0.494994		315.277	-0.742681		412.311	-0.904309		390.61	-1.42614
1432	266.565	-1.15541		117.207	0.759986		155.561	-0.904749		317.064	1.01299		274.539	-1.10157		421.664	-0.453904
1433	279.645	-0.335629		320.972	0.471346		381.202	-1.11823		214.482	0.39631		338.816	-1.17327		264.264	0.747248
1434	411.286	-0.723645		220.143	0.301393		306.25	-0.682412		267.747	-1.25464		353.269	0.617722		255.173	-1.04747
1435	336.654	-0.806715		276.443	1.41672		347.257	1.21167		241.515	0.918137		234.253	-1.13188		290.327	1.41441
1436	357.894	-0.353978		223.728	-1.22592		278.972	0.863411		225.399	1.14092		292.032	-1.0692		391.467	-1.15191
1437	424.435	-0.743781		365.537	0.0550689		323.758	0.263747		276.686	0.482152		375.282	-0.100356		219.084	0.00503646
1438	219.705	0.00516932		189.3	0.310625		171.053	1.46019		374.906	0.605491		348.387	0.512969		374.701	1.0129
1439	297.759	-0.0442514		284.065	0.563088		97.0176	0.717596		265.532	-1.03049		222.822	0.515772		352.933	1.03896
1440	396.42	0.603995		267.927	-0.175041		253.786	-0.614054		332.954	1.49169		356.657	0.43515		323.054	0.570016
1441	382.971	0.701215		116.807	-1.3753		276.12	0.82614		302.69	1.45963		178.088	1.18187		311.132	1.34641
1442	214.035	1.4011		214.879	-0.451568		237.65	0.779687		249.075	1.55994		184.051	-0.363014		622.167	-1.10118
1443	258.557	-1.46291		374.864	0.439414		295.594	0.655146		280.366	-0.320223		247.15	-1.36119		302.404	-0.713727
1444	311.638	-0.0466432		370.462	0.939612		172.324	0.211013		244.725	0.173947		146.965	0.928748		322.08	0.931555
1445	373.948	-0.184154		91.8202	1.5708		303.02	0.433356		246.994	-0.385709		334.476	-0.0628403		290.668	0.408517
1446	219.205	-0.0536044		272.423	-1.27549		114.4	-1.23187		158.009	0.931393		285.037	-1.21244		279.463	-1.51387
1447	317.846	-1.38696		230.843	-0.881451		276.136	1.51805		289.904	0.478114		228.763	-0.781197		366.015	-1.13762
1448	185.92	0.728335		214.354	0.331689		292.801	-1.38729		300.632	1.21096		227.265	-0.871314		330.924	-1.17484
1449	334.797	1.07214		299.726	0.939154		158.785	1.27026		303.09	1.28056		303.301	0.10221		338.358	-1.41411
1450	315.032	-1.36505		277.721	-0.0683386		248.598	1.26145		313.824	0.389121		281.1	-0.981341		339.743	-0.788932
1451	281.59	0.119959		280.931	-0.869223		248.599	-0.533105		233.603	1.41683		291.098	1.03276		164.128	1.28172
1452	240.817	1.27688		286.74	-0.13189		229.155	-1.43217		281.601	0.253396		283.593	0.688751		316.353	0.47792
1453	130.395	0.440093		356.918	0.263631		239.977	0.264861		386.588	0.485762		377.578	0.558089		263.384	-1.02059
1454	261.177	-0.985985		216.295	0.888861		341.392	-1.27094		215.131	1.46383		138.808	-0.186574		134.7	0.304098
1455	187.546	-0.409913		268.793	-0.0661788		199.391	-0.941917		292.035	-1.23736		310.045	-0.444773		378.08	-1.47404
1456	279.022	-1.28017		363.803	1.03913		85.9131	0.156145		166.39	0.86831		372.954	-1.1203		369.611	0.914289
1457	343.578	-0.81831		472.075	1.18051		252.755	-0.543618		350.067	-1.54039		262.271	1.5708		343.365	-0.843648
1458	225.177	1.46531		445.421	1.17717		215.984	1.07488		257.516	-1.07163		341.218	-1.55224		522.206	-0.587705
1459	256.905	0.539762		462.68	1.18114		256.201	-0.861462		200.139	0.704975		304.766	1.34495		340.34	0.362741
1460	220.874	-1.35939		458.657	1.13918		281.296	0.349548		330.387	0.0402177		340.77	0.144185		449.443	0.828208
1461	284.42	0.380518		467.689	1.15695		157.844	-0.00411206		360.371	1.05157		322.985	0.701303		234.065	0.938193
1462	372.629	-0.52908		418.439	1.09485		181.587	-0.333538		440.644	-1.32922		307.988	-1.00479		404.266	-0.806044
1463	278.87	0.154139		415.896	1.10238		196.426	-0.939121		494.509	-1.18959		470.351	-1.33034		716.694	-1.57053
1464	135.778	-0.916327		451.962	1.1123		364.841	0.737736		474.406	-1.27013		357.752	-1.28995		367.188	0.527454
1465	338.291	0.427201		418.585	0.961602		138.756	1.10313		445.833	-1.36468		307.558	-1.48642		264.731	0.99866
1466	387.729	0.298702		481.306	1.16861		345.005	0.328985		473.503	-1.28171		338.911	-1.38774		217.069	-0.423474
1467	327.051	0.599195		434.606	1.16019		341.219	0.623086		464.65	-1.3369		283.797	-1.48826		308.527	-1.41131
1468	364.642	0.3475		453.146	1.04971		268.377	-0.94212		456.173	-1.24214		299.325	1.29515		265.941	0.288208
1469	415.989	0.267873		503.365	1.17397		313.799	0.683112		450.175	-1.37717		328.686	-1.56389		274.961	-0.25281
1470	448.928	0.155589		426.628	1.0826		214.317	-1.13175		452.127	-1.34431		308.01	0.913264		258.178	0.171258
1471	449.716	0.0444113		464.096	1.12257		367.482	1.30908		454.216	-1.22048		278.503	1.31045		338.835	0.383114
1472	369.382	0.239505		441.889	1.05469		290.779	-0.456085		377.95	-1.29919		248.314	1.2574		242.846	1.06627
1473	340.059	0.426895		435.639	1.15115		159.078	-1.14569		439.085	-1.27072		205.351	0.20687		260.417	0.160131
1474	374.379	-0.0829991		457.449	1.10954		273.571	-0.953655		380.352	-1.28138		309.801	1.1872		258.428	-0.407161
1475	402.541	0.0471246		448.881	1.12215		174.433	0.615638		439.636	-1.24026		389.885	1.14024		483.697	-0.970521
1476	318.343	0.0359725		450.71	1.13247		216.588	-0.172248		456.417	-1.28544		395.786	1.01921		326.712	0.823887
1477	343.988	0.190827		475.272	1.16255		274.069	1.5708		415.914	-1.27998		416.047	0.773527		230.953	0.531909
1478	325.509	0.096012		483.734	1.13978		297.767	0.658171		468.639	-1.14534		363.939	0.648512		351.168	0.729083
1479	340.563	0.350639		449.532	1.1218		172.561	-0.555689		452.636	-1.16023		334.693	0.77742		239.267	1.2269
1480	389.563	0.0396427		483.27	1.15242		387.744	1.50926		449.739	-1.20968		411.272	0.642526		177.328	-1.51778
1481	400.314	-0.0184983		438.025	1.11048		284.918	0.765671		446.918	-1.17693		341.813	0.640911		215.444	-0.148337
1482	414.75	0.0622467		472.501	1.03986		195.789	-0.811586		454.375	-1.24099		342.174	0.906121		385.121	-1.25451
1483	356.417	-0.180005		456.284	1.17044		336.539	-1.05472		302.19	-1.27314		403.487	0.59883		300.783	-1.00833
1484	398.821	0.17197		480.679	1.16033		137.671	-1.23308		265.869	0.0966331		389.068	0.858176		314.814	0.143229
1485	377.365	0.214616		499.401	1.12327		204.495	-0.888385		355.966	0.717974		343.941	1.23626		227.234	-0.80236
1486	442.223	0.267815		472.542	1.18755		215.358	-0.064656		325.25	-0.34579		315.314	0.3702		309.024	-1.02496
1487	368.222	0.148656		447.547	1.09965		430.159	-0.0364181		344.113	-1.34291		290.366	-1.40351		318.693	-0.643104
1488	358.14	0.141397		499.059	1.06735		272.269	-1.44185		220.693	-0.625902		276.684	0.991725		382.602	-0.873521
1489	388.511	0.159958		445.271	1.09797		308.071	-0.928135		154.931	-0.639682		250.346	-0.743887		421.551	0.833897
1490	380.448	0.17462		463.313	1.16498		306.612	-1.35887		233.795	0.692		219.248	-0.117126		303.603	1.34503
1491	317.129	0.113969		440.733	1.16119		307.57	-0.340617		228.054	-0.245643		198.592	0.613111		304.723	0.53786
1492	435.518	0.200732		491.687	1.01678		245.622	0.62144		295.067	0.750482		291.307	0.482923		510.772	0.0616883
1493	413.194	0.0658145		435.271	1.19028		214.144	-0.00652228		368.597	1.22522		115.964	1.20728		420.674	-0.687628
1494	411.183	0.171413		436.534	1.15621		323.416	0.702975		327.024	0.570545		238.2	1.29161		188.335	-1.13532
1495	396.63	0.159677		435.037	1.21125		316.589	-1.13941		399.336	0.816101		243.389	0.594631		408.478	1.49666
1496	387.059	0.3053		488.988	1.14616		155.37	-1.40611		262.554	0.687476		161.296	1.09795		486.195	-1.0822
1497	393.211	0.354412		477.922	1.12904		154.312	-0.694614		305.911	1.18274		128.364	-0.450195		216.948	0.378917
1498	380.526	0.258865		466.795	1.14891		128.754	0.137575		268.283	1.48404		262.575	-1.10216		293.945	0.301795
1499	368.35	0.206957		454.155	1.10044		359.937	-1.26529		433.742	-1.17085		296.603	-0.845602		322.097	0.736695
1500	360.765	0.385736		441.413	1.1065		197.97	-0.763026		473.049	-1.26755		244.796	-0.822013		343.458	-0.608585
1501	352.862	0.172603		461.548	1.09679		393.77	-0.459096		497.849	-1.3371		229.949	0.678841		361.321	0.449101
1502	366.096	0.350039		464.227	1.06111		176.622	1.38939		496.866	-1.28402		262.121	0.527066		298.484	-1.42951
1503	361.841	0.361254		423.379	1.13179		253.028	-0.773491		453.56	-1.26307		239.509	-0.428821		393.606	-1.56262
1504	410.337	0.320161		503.581	1.17063		434.32	-1.41814		488.203	-1.43354		304.144	0.511781		314.744	-0.262651
1505	345.715	0.193846		444.013	1.14599		327.773	-1.34737		430.634	-1.16884		253.105	0.468641		262.592	0.90965
1506	416.491	0.197432		451.296	1.20701		79.6377	0.666355		460.776	-1.20683		228.966	1.5708		162.318	-1.31637
1507	386.95	0.182651		459.696	1.11964		363.956	-1.12216		478.937	-1.29896		421.523	0.492826		319.441	-0.615293
1508	370.049	0.335605		461.6	1.12061		280.511	1.11671		449.051	-1.32186		267.787	0.982603		406.992	-0.428129
1509	322.357	0.324771		470.375	1.16099		161.813	0.736151		474.545	-1.32389		198.91	-1.18091		467.226	-1.07245
1510	376.914	0.151417		458.119	1.01625		218.531	1.23616		481.285	-1.27341		209.471	-0.192483		324.439	-0.583482
1511	331.559	0.353808		481.955	1.13511		373.705	0.212321		446.569	-1.328		348.001	-1.37252		246.338	-0.290843
1512	402.107	0.15407		447.244	1.05388		498.664	1.30101		478.266	-1.28045		304.522	-0.278515		411.187	1.00175
1513	401.43	0.0855744		485.002	1.07193		256.95	-1.00883		459.591	-1.32261		344.32	-1.35773		369.423	0.953739
1514	427.822	0.222652		456.232	1.16794		157.98	-0.458203		454.544	-1.30826		289.191	0.970652		194.348	0.735401
1515	450.025	0.163314		445.806	1.07875		295.461	-0.388502		437.56	-1.46476		280.526	1.21732		281.767	0.642687
1516	373.963	0.321405		450.967	1.22895		177.387	0.235139		444.646	-1.32796		263.406	0.265603		318.399	-0.314551
1517	388.718	0.546191		425.643	1.16911		52.0256	1.10575		500.554	-1.33791		332.284	1.53005		311.943	-0.875115
1518	234.787	0.206967		482.284	1.20269		226.683	-0.801674		432.882	-1.26297		216.085	0.505106		303.766	-1.35904
1519	381.832	-0.0563218		455.544	1.18091		342.136	-0.742089		407.943	-1.12228		274.929	-0.647151		253.651	-0.943807
1520	449.146	-0.168922		451.582	1.10689		214.79	0.40231		425.946	-1.23383		372.253	1.22865		394.375	0.336942
1521	351.117	-0.736731		438.704	1.08201		332.777	-0.939553		474.229	-1.24266		173.22	1.01454		328.542	-0.376744
1522	268.299	-0.279172		456.338	1.00867		253.029	0.412262		442.786	-1.20368		200.06	1.54832		315.641	1.17049
1523	350.675	-0.933757		470.454	1.14104		159.281	-1.02957		453.043	-1.10995		352.567	0.733742		288.917	-0.838769
1524	262.918	-1.16904		447.554	1.15485		183.468	-0.949369		492.777	-1.19048		298.278	0.692298		392.062	-1.12925
1525	324.819	-0.920317		430.356	1.15066		363.225	-0.266591		455.043	-1.2731		320.236	0.429178		319.26	-0.755719
1526	213.056	0.281752		483.934	1.08891		290.829	0.0874882		487.888	-1.25659		228.543	1.24362		289.823	0.025578
1527	392.21	-0.292256		487.711	1.10632		374.992	-0.172477		475.087	-1.23736		257.172	0.941307		343.943	-0.265116
1528	350.991	-0.39321		467.427	1.1234		329.948	-0.334957		480.237	-1.15234		298.334	0.110254		356.221	-1.01433
1529	428.339	-0.0927855		434.279	1.22407		317.72	-1.04406		388.364	-1.51217		338.333	-0.19843		289.659	0.984209
1530	228.721	-1.43061		446.734	1.09093		228.504	-0.956106		265.397	-1.42836		360.651	0.157803		178.459	1.50555
1531	217.303	0.832763		464.838	1.21451		109.544	-1.03698		251.722	-1.30618		418.951	-0.0168308		424.721	-0.938323
1532	366.996	-0.937798		451.563	1.14017		436.065	-0.754701		363.722	0.34041		292.317	0.0172016		335.093	1.40405
1533	326.421	-1.27454		434.19	1.19312		450.13	0.0698386		222.729	-0.736236		451.576	0.00212344		528.516	1.57078
1534	189.716	0.411242		420.376	1.13489		289.989	1.5708		472.95	0.607754		401.295	-0.314083		289.863	1.51007
1535	190.747	-1.53619		424.737	1.22056		298.085	0.997759		347.529	-0.341211		394.079	-0.26647		275.695	0.846776
1536	236.001	-0.946596		446.697	1.18025		346.064	0.6396		447.082	1.05171		412.479	-0.360233		409.753	-1.47134
1537	300.658	0.292337		451.009	1.10292		257.129	-1.05069		304.874	-0.643623		376.166	-0.129023		400.538	1.56646
1538	291.983	0.893302		476.531	1.12886		354.347	-1.15141		256.428	0.396684		434.409	-0.365143		358.187	-0.555655
1539	270.828	-1.0415		458.484	1.03341		253.443	-1.37106		326.102	1.5424		436.795	0.0049692		404.498	-0.492227
1540	294.847	-0.900442		272.952	-1.5708		207.516	0.910819		334.7	-0.513712		481.023	-0.176351		220.616	-1.02272
1541	412.279	-0.85641		292.564	0.115625		436.768	-1.16368		329.991	0.330934		492.489	-0.213356		332.141	-1.35583
1542	416.593	-0.835849		165.546	-0.12927		254.619	0.89688		237.849	0.358174		486.104	0.0545204		213.982	-0.49906
1543	274.064	-0.819928		272.494	-0.407887		172.307	0.24675		317.083	-0.730675		504.812	-0.0957584		220.6	-1.05883
1544	275.595	0.206597		339.596	1.4126		256.953	-0.836375		227.537	-1.36902		486.885	-0.167201		305.201	-0.819075
1545	321.344	-0.542596		220.08	0.987096		372.194	-0.959496		298.708	0.130979		510.888	-0.210652		63.9632	-0.762146
1546	185.233	0.0282381		366.27	1.14894		437.724	-0.475751		354.337	-0.760051		512.635	-0.102002		273.086	1.40274
1547	305.696	0.668133		218.411	0.855718		445.579	-0.831055		221.456	0.574116		537.871	-0.217659		259.609	-0.561216
1548	281.24	-0.85216		286.044	0.631712		348.373	-0.671252		434.005	-0.0726236		606.015	-0.0592048		478.381	1.26399
1549	280.041	-1.08351		330.273	0.933738		159.52	-0.6292		244.679	0.413093		523.503	-0.161744		154.34	-1.44837
1550	264.412	0.656899		289.992	1.04469		538.841	-0.289153		304.108	0.409211		512.978	-0.10181		310.569	-0.0292341
1551	333.372	0.186397		257.817	0.164559		372.98	0.22089		212.593	0.454071		497.6	-0.0944333		335.886	-0.0366116
1552	298.438	-0.391303		280.863	-0.249266		316.15	-1.17232		243.136	0.993863		481.924	-0.0837839		367.198	1.2157
1553	521.593	-0.811464		302.25	0.977648		294.661	0.366168		341.041	1.04474		564.898	-0.0568662		265.358	-0.414816
1554	355.081	-1.23635		309.225	0.932843		316.884	-1.25374		188.327	0.953235		553.159	-0.120218		212.74	-0.953755
1555	187.669	-0.800053		156.476	1.00808		319.234	-1.21118		355.073	0.750607		571.16	-0.156704		229.153	-0.0887997
1556	329.29	-1.23168		350.133	0.971985		180.517	-0.453367		152.62	1.09915		556.287	-0.087695		274.901	0.563088
1557	236.053	-0.753386		216.153	1.10102		382.664	-1.211		390.535	0.134011		563.152	-0.0687427		208.684	0.10938
1558	276.509	-0.95742		469.478	-1.26107		377.199	-0.0460959		381.73	0.482357		550.204	-0.145246		316.031	0.388842
1559	211.17	-1.43123		277.425	0.431163		430.783	-1.49236		312.568	0.34882		524.744	-0.135804		324.513	1.19825
1560	206.278	-0.448888		336.062	0.944108		384.068	0.985363		361.917	0.595651		561.441	-0.116216		419.631	-0.685944
1561	270.742	0.0505023		332.515	1.0468		141.156	-0.776198		447.867	-1.16354		614.329	-0.12446		243.908	-0.265524
1562	343.431	-0.306215		318.186	0.738699		238.602	1.01512		319.681	0.814911		535.724	-0.0369347		271.289	-0.0260666
1563	193.503	-0.0010532		223.25	0.787698		147.269	0.825376		248.066	-1.46672		522.12	-0.0657252		366.676	0.261448
1564	395.036	-0.046097		259.039	0.925579		362.435	-1.20527		361.619	0.327565		556.255	-0.037443		307.727	-0.386478
1565	254.194	-1.05425		241.24	0.613578		217.077	-0.645767		344.767	0.55621		570.745	-0.0876318		333.936	0.513737
1566	361.241	-1.01556		268.224	0.146054		242.187	0.34389		92.8001	1.08528		520.721	-0.137269		356.72	-0.0866024
1567	331.419	1.38461		216.269	0.831326		213.231	0.0189169		244.727	-0.363451		512.929	-0.142461		351.942	0.54376
1568	168.857	-0.0677647		204.898	-1.5708		300.659	1.54512		220.553	-1.06689		560.952	-0.170685		411.085	0.414554
1569	178.749	-1.31346		250.668	0.973576		244.786	0.0632041		287.726	1.5708		541.082	-0.171578		269.958	-0.665155
1570	182.556	-0.427781		297.33	1.48568		252.464	0.165438		234.605	1.0055		536.604	-0.174124		273.438	0.763949
1571	244.527	1.33788		256.019	-0.770646		308.869	-0.628167		420.335	1.0744		534.64	-0.186839		277.609	0.818432
1572	243.758	0.00569838		166.544	-0.731806		269.721	-1.11981		306.787	1.29106		505.553	-0.193154		396.722	0.605533
1573	213.514	-0.400122		350.888	0.575836		272.024	-1.03255		172.375	1.52607		498.793	-0.142423		232.084	-0.439291
1574	268.564	-0.516685		391.451	-1.36087		286.47	-1.28832		350.986	0.548817		500.919	-0.177678		412.924	-0.412491
1575	268.073	0.922461		260.442	0.911212		148.948	-0.0730891		397.855	0.685675		612.391	-0.153795		284.493	-0.820914
1576	249.751	-0.435136		263.759	0.157132		342.381	-0.33144		370.164	1.26271		580.558	-0.092612		399.744	-0.800575
1577	332.96	-0.490992		278.64	-0.0062613		349.714	-0.319865		252.745	1.4716		423.246	-0.139893		356.965	-0.533445
1578	178.769	-1.35744		258.475	0.275465		295.658	-0.642671		322.298	1.31979		250.562	-0.352332		297.61	0.864188
1579	257.475	-0.626414		275.72	0.221128		435.494	-1.3688		354.519	-0.354203		173.32	0.608556		352.417	-1.25257
1580	355.758	0.449412		394.112	0.612451		451.862	-1.55565		284.493	-0.280815		335.435	0.761896		244.034	-0.301854
1581	236.116	-0.949841		188.523	-1.43041		251.713	1.06758		323.12	-1.5708		297.266	0.536807		363.271	-0.787846
1582	203.404	-0.874694		372.122	-0.650009		257.25	0.8045		255.65	-0.297665		237.718	0.613271		267.566	-0.412777
1583	340.67	0.00149425		343.584	0.16726		231.444	0.779364		292.652	0.011043		287.826	0.419118		240.278	-0.706927
1584	163.097	1.48428		302.849	0.907844		395.518	-0.392401		88.5728	0.631292		117.564	0.782019		489.066	1.08122
1585	300.064	0.162878		298.664	0.748817		274.738	-0.978047		263.496	-0.305112		278.415	0.680816		306.863	-1.56997
1586	171.24	0.857861		396.526	1.00012		307.891	-0.782565		283.373	0.534122		106.95	0.342811		329.472	1.32117
1587	437.801	-0.481111		260.369	0.565186		414.696	-1.20053		305.576	-1.4024		169.244	0.660259		359.956	0.647054
1588	398.37	-0.776435		280.054	0.16315		266.963	-1.2418		183.309	-1.07175		258.025	-0.337794		267.63	0.306333
1589	178.013	-0.0343297		248.582	0.751526		326.018	0.97049		373.184	-0.156337		216.845	0.680648		255.439	-0.188311
1590	183.794	1.04797		356.258	1.08626		321.067	-0.868983		365.314	-1.10407		215.569	-0.381255		271.662	1.41119
1591	284.364	1.5708		263.723	0.125753		347.007	-1.06204		284.968	1.43985		365.431	-0.298587		313.228	0.0979168
1592	292.175	-0.969904		275.684	0.845348		242.576	-1.33618		239.255	-0.749224		233.086	-0.89474		451.638	-0.120692
1593	314.36	-0.899912		288.057	0.368545		311.045	0.814045		194.153	0.814321		228.533	0.329094		293.519	-0.499865
1594	291.34	-0.108731		237.557	1.02521		141.857	-0.165039		395.211	0.654739		359.692	0.740505		454.324	-0.981452
1595	217.567	-0.656543		265.088	0.460542		240.946	0.688327		355.767	1.35191		390.374	0.2613		118.702	1.5708
1596	470.277	-0.722841		253.101	-1.46322		292.041	1.13328		318.841	0.612591		287.617	0.215782		315.312	-0.513898
1597	349.878	-1.02103		83.171	1.11823		318.101	-1.01312		277.343	0.595995		363.476	0.311811		396.729	-0.154508
1598	273.341	0.904798		446.65	1.11331		332.744	-0.695773		291.563	-1.42925		233.914	0.200583		231.879	1.01838
1599	306.716	0.729456		313.858	0.122666		298.576	-1.33168		207.57	0.995516		292.767	0.514559		324.839	-0.172179
1600	240.529	0.338943		349.099	1.02187		187.841	0.266566		251.174	-1.16338		106.903	-0.206779		337.992	-0.709807
1601	381.032	-0.636208		196.263	1.21996		279.157	0.955518		232.716	0.920265		371.916	0.172583		293.856	-0.697166
1602	340.475	0.621591		177.595	0.808621		208.467	-0.713353		304.769	1.19068		173.173	0.283251		310.94	1.17687
1603	379.839	1.41707		301.388	0.76166		268.6	-1.06369		353.539	-1.53601		241.961	0.00418407		716.372	-1.5705
1604	270.701	-0.445768		256.871	0.443854		348.757	-0.683866		217.65	0.748126		247.93	0.679765		378.191	-0.680703
1605	154.423	1.53636		224.964	-0.219379		415.569	1.4998		360.61	-1.39062		400.341	0.449154		200.316	1.23052
1606	297.154	-0.909719		255.536	-0.103073		244.49	-0.200587		96.9397	0.00289433		178.493	0.261057		309.819	1.24933
1607	298.494	-0.91039		171.906	1.34158		296.121	-0.224737		285.322	0.744677		259.124	0.983116		387.55	-0.777039
1608	348.333	-0.876451		255.484	-0.139675		367.706	-1.09359		214.928	0.601066		309.891	0.994358		369.266	-0.876759
1609	134.714	0.438659		224.826	-0.951264		174.141	0.186198		338.15	0.87505		204.731	1.18727		193.517	-1.53997
1610	167.102	0.263272		181.382	-1.34271		214.657	-0.653391		387.939	-0.982803		196.839	0.838722		248.854	-0.00142476
1611	337.286	0.249685		337.508	0.74772		202.088	0.237963		450.464	-0.756801		144.652	0.37289		91.7209	-0.735854
1612	249.361	-0.0826685		227.524	0.433378		95.8771	-1.19788		326.997	-1.50566		256.67	-0.599071		156.867	0.216808
1613	272.132	-1.11819		155.388	0.750955		386.139	-0.736978		360.245	1.41924		161.735	0.621583		292.365	0.519661
1614	278.014	-0.567978		279.021	-0.378103		399.311	-0.553093		333.088	1.07452		205.033	1.37053		350.806	0.0200091
1615	386.299	-0.961243		281.593	-0.693502		155.217	1.5708		398.928	1.13213		357.669	0.62593		138.627	0.365194
1616	302.026	-1.20464		153.95	0.244674		251.016	0.163532		178.367	0.82917		164.551	0.362692		275.446	-0.395572
1617	284.759	1.42578		410.623	0.584056		194.468	-1.09072		299.945	0.634414		237.481	-0.918806		365.865	0.584817
1618	209.228	-0.136		350.264	-1.35035		301.067	0.986522		212.556	1.18044		284.484	-1.22105		329.989	-1.0486
1619	275.019	-1.16549		296.905	-0.980578		291.106	-0.52928		280.307	-1.09578		190.903	0.637255		226.755	1.52722
1620	383.992	1.40142		286.865	0.655855		123.318	0.476204		140.415	0.19527		197.017	0.440115		303.816	-1.06501
1621	490.546	-0.586754		236.536	0.21479		209.722	-1.302		361.537	1.04685		286.774	1.17664		351.242	0.435975
1622	276.086	-0.763434		358.312	1.52114		256.534	1.48568		178.839	0.581112		235.603	0.450764		381.331	0.100138
1623	120.412	-0.973705		222.241	-0.659956		230.285	-0.566644		202.302	0.342103		196.409	0.655276		382.73	0.284413
1624	300.278	0.339177		321.97	-0.422719		293.747	0.184354		237.883	0.629873		130.575	-0.632241		406.976	0.0879218
1625	267.734	0.480224		262.418	0.786347		325.362	0.700886		342.353	1.07584		175.499	0.408899		305.797	0.086891
1626	298.641	-0.0477877		201.447	0.831161		307.076	-0.159293		264.483	1.02622		125.354	0.822566		341.48	0.157498
1627	237.199	-0.676428		295.384	-0.829723		514.739	-1.04554		312.804	1.15605		222.88	1.35467		336.492	0.244384
1628	295.283	-0.368114		263.99	-0.0510848		265.685	0.791265		399.785	-1.05167		218.9	0.805707		272.149	0.218903
1629	308.651	-0.960815		186.987	1.28403		217.045	1.15193		325.02	-1.08946		201.628	0.259688		258.185	0.224302
1630	385.065	-0.196828		314.677	0.631504		390.096	-0.999059		143.714	-1.4319		169.914	0.735257		291.715	0.193779
1631	283.736	-1.08535		313.457	-0.840428		292.181	-0.272052		350.533	0.627045		218.78	1.4143		312.504	0.277657
1632	198.337	1.16195		198.219	0.378808		450.846	-0.421826		288.152	0.51617		102.654	0.521967		234.486	0.218172
1633	387.948	-1.0194		164.008	1.14093		252.027	0.721301		261.082	0.686788		156.405	1.5708		281.996	-0.25934
1634	262.725	-0.751518		217.171	1.5708		535.741	-0.791547		370.89	0.856377		256.397	1.31829		262.037	-0.363011
1635	284.043	-0.843043		305.11	0.76831		323.599	-0.476938		223.453	0.731845		251.024	0.69014		256.177	0.297456
1636	107.135	-0.135352		242.386	0.992608		230.878	0.792457		295.098	1.21396		178.543	-0.970454		380.297	0.784653
1637	92.4262	0.762783		216.649	-1.47773		239.988	1.28151		244.408	0.860876		154.405	-0.985718		400.81	0.768525
1638	183.303	0.613869		342.772	1.42733		322.775	0.897274		400.784	-0.753613		294.873	0.885352		322.223	0.235263
1639	250.095	-0.176508		251.573	0.709051		266.115	1.00465		202.544	-0.524024		165.504	0.325021		339.144	0.988337
1640	351.038	0.35108		209.346	0.45221		254.594	0.525288		218.688	1.37831		361.063	0.561914		457.396	1.08797
1641	388.152	0.240946		294.404	-0.697082		232.639	0.0604637		228.943	0.912946		254.315	0.320473		406.383	-0.024734
1642	340.423	0.227695		325.635	0.083927		345.008	0.44979		312.572	1.01017		151.591	0.708523		356.079	-0.730024
1643	318.172	0.0599916		232.577	-0.0735939		254.569	-1.06455		264.989	1.01506		275.339	0.0171178		331.876	-1.48663
1644	330.148	0.198992		141.293	-1.3429		324.175	1.00095		262.523	1.5708		188.731	1.41306		209.506	1.12221
1645	312.011	0.12908		245.792	0.760492		382.578	-0.687419		391.038	-0.807864		266.916	0.548229		463.13	1.2818
1646	377.776	0.118369		195.093	0.98212		170.401	-0.762792		246.826	0.194868		298.455	1.40831		235.909	0.646663
1647	409.113	0.387175		383.496	0.884947		387.112	0.422365		171.653	0.67843		101.966	-1.24079		304.896	0.0279039
1648	357.356	0.550055		309.672	-0.00113258		221.856	-1.43725		301.635	0.463364		237.586	0.503691		324.516	-0.116351
1649	363.092	0.375552		164.329	-1.5708		150.616	1.31717		284.112	-0.0839033		266.998	-1.09693		277.122	-0.936524
1650	359.913	0.340469		317.031	1.2295		304.714	0.421492		235.035	-0.411248		176.724	1.10503		402.402	-1.07499
1651	415.714	0.498165		311.105	-1.16114		308.104	0.307561		299.567	0.370681		282.314	0.584066		449.375	-1.07846
1652	404.628	0.221302		139.597	0.834721		340	-0.368791		345.827	0.255738		94.1848	-0.607495		248.432	-1.19306
1653	302.806	0.324979		288.236	0.261818		353.031	0.534386		272.46	0.909654		180.419	1.07724		410.188	-0.654853
1654	365.794	0.116734		55.1682	1.37353		234.528	0.734935		250.753	0.796072		351.14	0.738302		265.744	1.26016
1655	381.897	0.0287659		408.543	-0.678703		128.572	1.35125		246.002	0.126193		187.551	0.668007		230.182	1.52375
1656	317.959	0.159677		309.422	1.21997		160.332	1.00542		281.571	-1.05429		262.479	-0.0405989		197.778	-0.227973
1657	384.565	0.298427		260.171	1.08148		210.065	1.28885		323.979	1.19341		286.87	0.580681		369.407	0.455409
1658	425.781	0.242088		275.679	0.579048		148.602	-0.39913		316.978	-0.531959		235.14	0.608402		356.412	0.692239
1659	318.74	0.287446		186.785	-0.10396		228.55	-1.40806		477.086	-0.408624		252.881	0.0470004		319.958	-1.25147
1660	412.882	0.401715		238.088	0.731597		209.368	1.00415		279.532	0.715171		229.372	-1.18306		225.276	-0.0990776
1661	402.226	0.168842		291.759	0.0812117		308.32	0.396263		317.924	-0.144428		327.588	1.45048		340.338	-0.766964
1662	355.548	0.0353629		129.264	-0.9871		135.795	0.725112		340.614	0.295272		292.13	-1.2171		222.841	-0.60782
1663	316.45	0.528258		316.645	-0.143687		312.325	1.4148		242.384	0.583681		246.781	1.42692		261.321	-0.374323
1664	383.441	0.453497		276.809	0.268128		301.766	0.351808		251.478	0.0235525		179.232	0.702403		527.987	1.57079
1665	345.693	0.292156		250.972	-1.05966		316.289	-0.814537		223.27	-0.759181		190.027	1.32522		316.8	-0.551603
1666	393.075	0.476238		372.417	-0.0925111		395.245	-0.249344		222.548	-0.237393		191.062	-0.890534		294.318	1.0717
1667	341.39	0.300882		264.087	-0.45153		250.937	0.194193		343.869	0.566231		157.051	-1.4193		270.718	-1.36842
1668	348.052	0.182779		221.525	-0.542424		299.178	0.348421		378.649	-0.661202		239.837	-1.05528		417.326	-1.32298
1669	354.025	0.192956		205.717	-1.46745		342.115	-0.196729		309.074	-0.601487		339.818	0.230397		247.38	0.323089
1670	348.682	0.1014		263.836	0.704464		326.907	-1.0427		251.571	0.241128		250.652	-0.560604		254.64	0.0895743
1671	414.906	0.185533		324.722	0.43667		294.848	0.954513		326.757	0.06327		190.74	-0.41117		313.487	0.283177
1672	368.153	0.100249		266.905	0.765862		140.031	1.12749		336.194	-0.642841		284.186	1.20644		279.314	-0.823179
1673	437.895	0.241821		227.3	-0.332487		321.524	-0.998276		340.788	0.233658		289.727	0.489089		288.074	-0.760761
1674	342.92	0.513913		230.643	0.258951		473.896	-0.477741		224.461	-1.37977		224.129	-0.510698		289.321	0.201049
1675	311.808	0.324504		265.819	-1.1544		446.24	-0.993573		158.166	-1.41817		234.216	0.33435		537.387	-1.12163
1676	367.542	0.0673819		225.181	0.0775859		196.041	0.488012		424.588	-1.23511		268.693	-0.311027		324.46	1.22546
1677	401.932	0.140809		356.239	1.28703		243.114	-0.54749		125.393	1.1537		304.554	-0.101807		341.343	1.13493
1678	434.881	0.153907		303.695	1.07142		244.378	0.722461		352.372	-0.133133		221.672	1.1778		326.84	0.990064
1679	435.072	0.0738725		77.5186	-0.859971		469.8	-1.24182		396.802	0.628498		140.335	1.53205		398.447	-0.987927
1680	423.364	-0.0074108		186.346	-1.3814		386.269	1.26546		222.003	0.726741		262.581	0.0095386		273.746	-0.254436
1681	403.461	0.108514		298.891	1.01367		279.578	-0.215515		377.521	1.46809		231.743	1.05393		336.38	1.28117
1682	391.56	0.0673154		188.607	-1.2565		213.061	-0.258432		463.403	-1.03799		274.685	1.48669		380.568	1.04707
1683	419.138	0.316465		309.191	0.837387		253.816	-1.25933		319.965	-0.800427		267.32	-0.510614		418.24	-0.984964
1684	395.51	0.123257		246.868	0.483316		277.839	-1.41241		241.038	-0.131075		207.655	0.839471		225.048	-0.786298
1685	372.349	0.22596		240.599	0.455677		277.862	-0.224052		419.469	0.301631		212.362	0.328212		369.654	-1.27805
1686	438.96	0.342194		181.43	-0.130588		400.522	-0.187299		279.85	-0.185851		290.171	-0.319245		241.828	0.206911
1687	415.964	0.489285		145.716	0.671669		179.424	-0.85686		388.486	-0.871014		266.549	-1.5708		199.104	0.217988
1688	380.25	0.211272		196.759	0.418306		366.722	-1.20928		271.398	-0.910675		330.414	0.160775		375.572	0.42489
1689	360.031	0.304069		401.69	-1.06647		206.714	-1.03771		313.875	-0.60704		275.503	0.12264		113.156	-0.0850459
1690	302.612	0.71397		243.048	0.223838		209.656	0.543697		293.742	0.243781		291.323	0.418278		444.859	1.00699
1691	250.263	-1.46674		338.2	0.548168		283.878	0.433097		313.164	0.617176		330.569	0.215372		301.838	-0.0374423
1692	303.042	0.0522191		373.179	1.16851		377.473	1.2433		373.514	0.431876		269.306	0.166687		343.112	-0.49264
1693	367.041	-0.172208		248.439	-1.5708		179.573	-0.0698682		334.874	1.53776		209.755	0.798017		389.119	1.0315
1694	383.894	0.409845		338.673	0.412483		252.469	-1.3197		346.455	0.0799345		84.7004	1.15939		264.077	-1.13396
1695	334.677	-0.562485		412.64	-0.32476		204.203	-1.21955		350.325	-0.839253		288.458	0.291064		515.804	-0.48133
1696	323.647	-0.223399		405.243	0.0320036		173.272	-1.41114		245.771	-1.37306		191.991	0.842245		299.622	-1.49966
1697	138.842	1.2358		310.386	-0.0231679		339.536	-1.05397		320.213	1.27024		310.761	1.12755		386.651	1.35678
1698	161.332	0.775758		250.5	0.548555		104.821	0.450296		408.998	-1.36686		212.59	-0.410744		259.484	-0.609617
1699	341.716	0.634142		241.582	1.46246		305.436	-0.719008		277.382	-1.11586		232.857	0.828008		358.982	-1.03226
1700	396.581	0.0828012		397.73	0.506859		258.627	-0.606822		485.289	-0.981197		192.549	1.26387		238.066	-0.404664
1701	173.161	1.112		114.146	1.02259		281.983	-0.580222		433.866	0.0660194		305.994	0.281107		260.493	1.16153
1702	1095.09	0.862537		321.18	0.753881		304.732	-0.526292		344.906	-1.40588		247.484	0.81782		134.042	-0.239736
1703	380.856	-1.40984		341.589	0.676635		310.77	-0.421183		353.214	-1.23144		236.814	0.116429		288.098	-0.776745
1704	267.018	-0.139858		243.521	0.171177		334.927	-0.540125		238.665	-0.0499778		287.432	-1.38438		392.661	-0.400337
1705	61.3244	-0.479119		271.208	-1.25423		327.138	-0.282044		276.717	0.339065		200.036	0.888923		471.191	1.36929
1706	261.943	0.134359		173.283	0.601723		413.965	-0.147347		323.113	-1.27245		198.036	0.227825		229.809	-1.03198
1707	239.523	0.628216		304.476	1.15052		354.12	-0.478499		305.78	1.47512		191.57	0.833934		388.435	-0.232514
1708	184.258	0.500499		309.307	0.694357		371.896	-0.46927		337.303	1.36304		340.69	0.430483		502.571	0.0370949
1709	264.086	1.35938		237.665	-0.541804		401.645	-0.318718		235.863	-0.152395		231.394	-0.312106		392.392	-0.638135
1710	223.65	-1.05277		310.513	-1.50587		374.244	-0.383016		266.609	-0.326674		287.936	0.632335		325.449	-0.404394
1711	186.806	0.0504721		255.221	-0.481189		425.596	-0.186542		344.608	-0.536992		156.894	-0.39433		211.713	-0.617812
1712	337.335	-0.799645		288.278	-0.827969		430.311	-0.200415		222.208	0.153318		125.043	0.772622		364.727	-0.0687514
1713	298.879	-0.423478		331.036	0.607087		441.563	-0.227802		244.646	0.98491		239.89	-1.54059		460.644	-0.555978
1714	88.1678	1.15001		404.616	-0.261699		440.484	-0.165043		305.704	-1.17614		124.987	-0.0625648		177.685	-1.14093
1715	297.426	-0.576226		305.312	0.724268		464.848	-0.222513		323.464	0.569371		250.675	0.733889		211.086	1.22778
1716	364.299	1.21682		107.337	0.947071		496.782	-0.163532		379.897	0.557022		336.997	0.392299		306.565	1.01745
1717	327.77	1.0625		210.772	0.375		464.466	-0.177459		340.43	-0.325076		388.97	0.598527		390.611	-1.0648
1718	169.309	1.24965		282.63	1.2393		507.341	-0.254156		358.81	-1.17514		159.987	0.448654		382.894	-0.565714
1719	274.925	0.587765		375.652	0.526935		522.355	-0.0507122		295.518	-0.878744		286.869	0.836742		386.783	-0.54765
1720	160.617	-1.50552		331.006	0.218432		483.214	-0.189034		371.934	-0.0727881		341.361	0.196424		410.081	-0.474711
1721	282.954	0.788809		376.992	-1.52501		504.537	-0.140369		365.943	0.13758		199.878	0.85274		285.275	-1.32375
1722	276.456	-0.580619		302.04	-0.435551		511.088	-0.150824		212.974	-0.311767		224.698	0.545868		308.029	0.619936
1723	324.526	-1.08284		212.951	0.655831		520.256	-0.157209		151.257	-1.05368		199.876	-0.203808		215.459	-0.854374
1724	295.307	-1.48943		358.575	0.371072		471.38	-0.202917		339.476	0.0159809		432.094	0.438193		351.908	-0.661988
1725	343.475	-0.574709		280.129	1.43393		498.329	-0.16759		303.501	-1.07195		240.399	-0.146035		385.727	-0.831086
1726	257.542	-0.689027		184.922	0.61803		533.095	-0.140937		263.4	1.09343		260.843	0.631516		416.048	1.21353
1727	350.098	-1.43159		182.357	-0.891533		384.19	-0.324358		217.855	-0.467681		184.573	0.0841428		324.177	0.587079
1728	254.944	-1.06886		381.537	-0.00331268		462.059	-0.224406		144.641	-0.842819		199.329	-0.0134327		226.05	0.309476
1729	103.543	1.48108		170.154	0.744686		441.908	-0.294885		247.424	1.20835		327.402	-0.362142		285.104	-1.35044
1730	283.574	-1.21262		157.736	-0.0679948		481.704	-0.270928		384.952	-0.502648		281.338	-0.453223		135.586	1.29738
1731	322.064	-0.839438		323.109	-0.429336		486.639	-0.167883		472.621	0.0261439		422.516	-0.48583		339.934	-1.28552
1732	320.233	0.147367		273.693	-0.348033		536.961	-0.218223		345.811	-0.0736245		320.799	-0.42538		716.502	-1.57054
1733	274.581	0.0334042		258.121	-0.245848		440.913	-0.151824		199.784	-0.342344		330.942	-0.714681		293.04	-1.19922
1734	307.735	-1.29036		267.145	1.30741		480.262	-0.259579		333.18	0.248828		255.265	0.62355		411.566	0.618441
1735	207.134	-0.889575		164.181	-0.509797		474.146	-0.152729		285.053	-1.26749		131.729	0.433204		382.067	-0.743782
1736	279.991	0.952771		268.226	1.38732		450.448	-0.187569		255.157	-1.27207		178.901	-1.23431		277.818	0.169023
1737	162.866	-0.127844		195.739	-1.48919		492.527	-0.26991		249.004	-1.42067		126.536	0.00963717		314.911	-1.30285
1738	91.8548	-1.27782		225.887	-0.509859		498.282	-0.240339		139.167	-1.5708		198.444	-0.762905		362.649	-0.788592
1739	288.61	-0.816181		224.799	-0.0823608		520.748	-0.222552		340.416	-1.27947		285.561	0.032438		325.697	-0.644021
1740	308.915	-0.442076		303.126	1.3367		477.815	-0.121112		353.059	1.29021		246.523	-0.740337		427.912	-1.34043
1741	339.066	-0.402857		278.766	0.605849		525.441	-0.219018		287.428	0.232047		305.303	0.13234		344.457	-1.00782
1742	277.597	-0.705287		214.911	-0.935913		530.91	-0.206748		400.627	-0.264381		338.739	1.23451		313.645	-1.50084
1743	353.685	-0.142759		239.656	0.360447		539.59	-0.145671		369.512	0.513338		125.775	-1.02323		375.235	0.279011
1744	250.082	0.748427		285.229	0.19348		535.783	-0.147375		217.575	1.32739		210.443	-0.807494		236.965	-1.04519
1745	282.594	0.0147422		295.306	0.172014		521.587	-0.184635		337.006	-1.27491		189.085	-0.255324		111.773	0.378276
1746	280.304	1.37702		293.092	0.453619		526.258	-0.210613		408.836	0.491663		341.433	0.924221		235.088	-1.12189
1747	257.986	1.24375		300.246	0.768397		518.58	-0.202801		366.916	1.07269		206.798	-1.47376		328.74	-0.322605
1748	297.448	0.343903		286.25	0.256756		487.015	-0.202609		333.577	-0.78802		209.416	-1.12586		469.539	0.199878
1749	307.857	-1.08565		183.44	-1.21125		531.081	-0.242864		239.299	-0.626153		305.054	0.255803		367.752	0.675509
1750	330.689	-0.911766		292.642	1.24812		543.462	-0.200537		284.367	-1.15049		181.453	-0.00498264		390.013	-0.984
1751	250.825	1.22165		234.18	-0.240889		505.885	-0.16049		272.269	0.245277		338.678	0.754856		350.734	-1.18163
1752	275.839	-0.0396376		326.695	0.315412		507.665	-0.229476		277.194	1.32404		210.569	0.659045		324.189	-1.32462
1753	188.82	0.334218		229.256	0.198656		539.005	-0.119212		303.154	-0.82893		181.417	-0.707039		247.788	-0.596922
1754	379.223	-0.664797		212.587	-0.194054		486.995	-0.238629		236.386	-1.40825		288.121	0.286114		430.706	-0.776831
1755	194.718	-0.0735047		304.879	0.398933		505.754	-0.164704		304.065	-0.637627		236.578	0.47318		294.98	1.07541
1756	313.494	0.750625		283.602	-0.359766		459.447	-0.119849		200.776	1.07252		306.942	0.543403		419.929	0.951496
1757	302.307	-1.5708		334.359	-0.466		514.166	-0.211066		318.811	0.281842		314.262	1.38658		460.998	0.5266
1758	298.637	0.30773		309.618	-0.278426		493.733	-0.157585		191.954	-1.41129		364.793	0.75567		356.268	-0.730726
1759	268.809	0.52487		243.869	0.399175		504.635	-0.182859		150.017	0.280042		263.493	0.18194		282.255	0.874213
1760	290.327	-1.26053		53.8039	-0.167853		554.206	-0.177634		181.113	0.466368		367.427	0.706236		715.453	-1.57047
1761	190.461	-0.675073		166.643	0.656093		565.045	-0.200678		348.485	0.592499		375.119	0.384057		298.551	-0.0725938
1762	299.593	0.284863		294.052	0.667313		499.951	-0.190393		115.758	-0.800612		288.964	0.540561		216.131	0.992288
1763	327.161	-0.678362		353.415	1.19341		511.23	-0.24499		276.135	0.655589		228.066	0.966984		345.134	1.5708
1764	259.257	-1.18889		250.821	-0.145498		522.261	-0.137956		253.814	-0.324826		219.514	-0.0436261		326.493	-1.5708
1765	87.3159	0.907988		395.625	0.210756		470.777	-0.271351		380.991	0.130298		312.176	0.453401		239.281	-1.25079
1766	324.259	0.504433		318.787	0.429599		491.509	-0.19283		212.934	-0.632454		200.221	0.0305555		268.981	-1.16398
1767	429.456	-0.376339		226.589	0.884641		499.006	-0.178588		317.157	-0.372802		343.731	0.527316		292.919	-1.5708
1768	231.166	-1.17483		362.635	0.419322		450.751	-0.233918		354.581	0.869495		271.301	-0.869352		396.594	-0.769153
1769	341.01	-1.30982		323.013	1.14664		480.987	-0.105077		386.749	1.20507		243.294	-0.47784		242.206	-0.828452
1770	353.122	0.227733		241.513	-0.996344		493.286	-0.206479		243.741	1.54521		261.061	0.346461		331.748	0.424901
1771	122.596	-0.0989563		440.135	0.386229		512.299	-0.114079		336.529	-1.35503		200.651	1.243		375.97	0.412841
1772	274.341	1.04899		365.553	0.931492		482.94	-0.302216		206.599	0.886827		327.802	0.969577		335.188	1.19971
1773	250.029	0.912588		462.229	0.312769		503.383	-0.216961		279.247	0.0221192		110.657	0.440778		161.542	0.513343
1774	267.182	0.860558		249.691	-0.033921		525.264	-0.189395		303.151	0.730928		287.253	0.516331		416.451	-0.342884
1775	279.004	-0.023764		289.314	1.30832		472.341	-0.163021		257.7	-1.559		186.822	1.01212		206.943	-0.706024
1776	236.765	-0.942303		209.446	-0.527684		523.683	-0.216457		141.427	0.595282		261.033	0.724876		376.708	-0.746079
1777	339.243	-0.666982		261.371	0.901814		556.336	-0.178117		289.087	1.32132		147.215	-1.21765		390.916	-1.16269
1778	264.542	1.16884		290.139	-0.097359		505.808	-0.10465		307.975	-0.831381		229.651	-1.20057		271.481	-1.18107
1779	310.515	1.38985		181.481	0.730685		520.183	-0.176292		193.944	-1.27855		263.027	0.778351		388.986	-1.5708
1780	219.471	0.382959		295.104	-0.23015		525.666	-0.170153		365.766	1.46426		103.983	0.468641		349.088	-1.5708
1781	236.195	1.45752		244.527	1.03498		496.141	-0.104657		199.884	-0.770855		224.158	0.0376775		361.564	-0.767247
1782	210.948	-1.02921		174.928	0.372672		480.844	-0.172258		189.328	1.49203		290.744	1.19561		362.274	-0.42346
1783	521.33	-0.424587		417.206	-0.119506		488.816	-0.139742		390.515	-1.27258		402.816	-1.44948		181.063	0.00380784
1784	218.302	-1.30962		160.223	-1.37498		532.797	-0.224724		283.745	0.223114		133.054	-0.135098		336.191	0.409561
1785	371.338	0.592182		211.095	0.0960849		493.951	-0.173577		304.158	1.01233		283.781	-1.28518		345.698	0.3366
1786	271.467	-0.166175		254.874	0.197615		478.122	-0.202331		360.249	1.34411		243.695	-0.403751		320.842	0.733713
1787	184.727	-0.986708		168.137	-0.11232		480.994	-0.145844		380.248	-1.09504		308.946	0.350361		150.467	-1.53489
1788	412.054	-0.569791		291.219	0.588275		443.368	-0.180125		423.037	1.50308		303.453	0.396909		121.736	-0.545664
1789	337.534	-0.126567		112.138	1.2958		438.76	-0.124989		148.986	1.41575		220.502	-0.351476		279.476	0.0690727
1790	207.876	0.559409		254.534	0.179286		524.792	-0.188755		306.772	1.37511		223.547	-1.5708		364.407	-0.607933
1791	273.614	-1.22844		349.817	-1.02528		491.779	-0.124537		343.385	0.69569		156.985	0.383613		414.433	0.333619
1792	391.878	-1.3872		125.483	0.508972		526.524	-0.132912		372.3	1.5708		299.079	1.05364		222.005	-0.553701
1793	295.42	0.439383		309.535	0.539762		525.742	-0.155766		340.723	-1.0763		189.096	1.5708		281.211	1.32526
1794	408.481	-0.794921		388.354	0.496233		511.448	-0.189252		335.397	1.09967		265.582	0.827848		420.112	-0.979939
1795	358.164	-0.275883		286.39	0.901858		512.54	-0.102667		244.139	1.19572		262.742	1.14076		648.841	-0.898461
1796	262.528	0.136445		252.63	1.12531		522.061	-0.0470691		358.177	-1.19404		314.64	1.54211		332.012	-1.43462
1797	319.185	0.854827		296.789	0.518265		514.584	-0.185425		218.795	-0.879812		210.262	0.769183		265.773	-1.00599
1798	418.624	-0.96348		312.504	-0.0556947		479.409	-0.225337		196.348	-0.96525		264.522	0.53664		276.891	-1.35842
1799	426.822	-0.657965		179.49	-1.51059		531.179	-0.218392		381.759	1.25422		200.437	0.777944		282.72	-0.305794
1800	198.436	-0.183		303.262	-0.194519		565.619	-0.190659		298.989	1.17189		236.496	1.10172		361.575	-0.308441
1801	82.0842	-1.5708		255.474	-0.900609		483.045	-0.235753		240.859	-0.325504		275.589	0.56994		251.888	-0.304124
1802	217.393	1.08462		297.741	-1.49619		539.691	-0.163663		441.316	-0.632487		381.342	-0.273397		310.752	-1.12368
1803	293.85	-1.39904		354.132	0.284727		477.846	-0.234575		385.569	0.763002		242.736	1.26367		386.019	-0.579249
1804	251.898	-0.986088		125.118	0.987064		497.931	-0.149237		344.62	0.4431		279.013	-1.4303		296.997	0.34733
1805	321.151	0.981896		259.758	-0.124317		468.927	-0.164847		222.033	1.25126		224.585	1.39844		472.249	-1.01954
1806	166.091	-1.43554		209.084	1.15934		509.511	-0.080398		118.714	-0.394284		337.73	0.309339		378.462	-1.02755
1807	178.619	1.5304		281.968	0.448423		507.04	-0.162302		360.939	-0.490218		378.214	0.444072		275.002	-0.530601
1808	368.37	-0.633831		180.138	0.433063		485.166	-0.160407		388.844	-0.724513		255.41	0.887422		421.659	0.923272
1809	224.367	-0.643958		255.237	0.339165		559.503	-0.141363		455.914	-0.552625		436.121	1.45181		248.737	-0.858957
1810	277.729	-0.778934		231.587	0.357496		515.634	-0.153497		291.023	0.30114		131.178	1.4499		306.236	-0.27478
1811	376.103	-0.726035		232.818	0.981884		521.272	-0.188224		372.105	-1.47097		228.192	-0.413089		131.61	0.62494
1812	253.818	-0.198449		264.172	-0.933231		567.602	-0.155411		185.182	0.561216		280.069	-1.01719		334.653	0.296776
1813	161.836	0.145225		79.6983	0.36226		519.291	-0.127542		302.571	0.255768		114.184	-0.369764		446.916	1.10344
1814	248.937	-1.27539		196.548	0.0112734		495.945	-0.187823		402.75	-0.18175		199.927	1.15804		332.394	-1.05977
1815	213.321	0.0995569		298.416	-1.55027		496.104	-0.188107		348.681	1.41308		327.438	0.581148		183.222	-1.53369
1816	184.563	0.313886		239.419	1.06979		468.128	-0.152964		258.435	0.775336		320.505	0.986563		239.367	0.368081
1817	320.825	0.421493		329.906	0.744332		487.64	-0.16086		230.992	-0.744149		417.839	-1.44174		204.491	0.253064
1818	327.936	0.576475		232.454	1.05324		502.337	-0.194229		269.072	-1.07837		362.557	1.04725		399.451	0.36407
1819	197.302	0.183166		267.064	-0.926678		511.578	-0.279935		218.626	1.15953		243.578	0.847357		325.174	0.1113
1820	225.657	1.1645		162.912	0.589798		494.202	-0.277014		264.069	0.828319		166.672	0.191555		285.657	-0.990536
1821	323.866	0.83483		349.579	-0.546162		465.191	-0.224725		236.507	-1.31001		222.434	-0.280083		605.174	-1.43438
1822	232.621	0.66044		290.508	1.23118		470.482	-0.264564		263.522	1.39994		219.064	0.0122829		349.213	-1.27738
1823	200.065	-0.570856		159.912	1.2226		546.512	-0.224792		301.945	-1.25077		359.451	0.511567		364.212	-0.788809
1824	339.776	-0.467368		270.599	0.500419		541.914	-0.11835		375.07	0.643576		234.459	1.16279		301.673	0.64881
1825	333.894	-1.06215		322.844	-1.31544		508.505	-0.132452		269.141	1.30325		292.455	0.525151		160.623	-1.17769
1826	309.512	-0.174435		332.498	1.04977		529.534	-0.0937358		268.61	-1.19365		308.825	0.983307		453.276	-0.617135
1827	291.294	-1.14579		279.395	0.988213		477.394	-0.0496165		294.814	0.715429		299.38	1.38633		192.053	1.28483
1828	162.965	-1.15056		264.409	0.178554		496.604	-0.163314		216.281	-0.328719		343.975	0.98425		355.733	0.912407
1829	169.769	-0.973289		125.499	-0.542211		507.359	-0.0564557		249.903	0.889007		252.971	0.176332		314.501	0.269325
1830	162.861	0.697379		80.2626	-1.48452		552.553	-0.179567		291.516	1.21881		175.895	0.57047		268.076	0.526448
1831	209.128	-0.0688303		358.246	0.623271		522.275	-0.155142		369.77	-1.03364		187.264	-0.925037		235.124	-1.08092
1832	293.016	-0.124252		293.237	0.318005		514.168	-0.0968367		367.073	0.481125		258.293	1.33025		459.65	1.48919
1833	134.764	0.368066		289.103	0.665323		528.711	-0.126931		212.587	0.988247		257.431	-0.00772295		315.756	1.32882
1834	302.931	0.300742		329.629	-0.467448		536.473	-0.0471219		269.7	1.1911		369.278	-1.37721		277.175	-1.46159
1835	225.807	0.657347		292.421	0.385286		523.217	-0.0130089		245.312	1.09953		341.659	-1.3776		329.562	0.732144
1836	169.162	-1.15213		234.92	1.25603		523.854	-0.0337081		241.512	0.752911		303.654	-0.685137		206.918	1.04788
1837	279.391	-1.55374		351.862	0.444579		505.453	-0.149191		360.111	0.587142		251.97	-0.0429639		375.209	-1.25828
1838	154.403	-1.34743		217.651	-0.314936		501.525	-0.0940187		346.641	-1.53155		404.351	-0.305877		374.852	-0.919913
1839	237.002	1.56979		187.845	0.923401		533.287	-0.0641076		472.819	0.627864		285.328	-0.299269		497.782	-0.497404
1840	251.523	0.229778		231.68	-0.287467		514.233	-0.161493		292.115	0.831433		280.936	0.437003		401.025	-0.44975
1841	247.037	-1.25484		308.542	0.907803		479.704	-0.171167		189.774	-0.230852		178.795	-0.593429		295.992	-0.658536
1842	139.91	-0.27371		250.738	-0.474938		489.7	-0.0987199		248.344	1.40923		392.951	0.0870481		407.148	0.0382181
1843	393.9	0.131053		168.766	-0.635959		457.693	-0.167869		179.449	1.46892		271.821	0.191646		213.673	-0.192104
1844	309.769	0.282932		397.478	-0.388964		473.351	-0.146419		225.826	0.938401		330.519	-1.49884		361.292	0.415444
1845	239.579	-1.51855		256.867	0.922208		371.728	0.415643		253.847	-0.207748		278.138	1.33896		196.637	0.441513
1846	445.513	0.625679		336.081	0.308796		251.276	0.383845		290.266	0.107799		220.349	0.5933		127.081	-1.16066
1847	128.724	0.337684		229.811	-0.620754		473.228	0.574761		289.943	0.885365		206.804	0.204805		390.367	-0.608001
1848	261.542	0.510852		262.267	-1.21534		379.82	0.764075		219.347	1.32123		185.134	-0.755926		329.303	0.764949
1849	311.239	-0.214598		213.807	0.628932		119.892	0.600166		136.222	-1.16777		390.02	0.452763		162.541	-1.16133
1850	272.632	-0.350331		264.265	0.976981		553.82	0.880605		312.62	1.3267		192.39	1.55755		236.137	-0.867623
1851	292.958	0.13909		358.058	0.544617		607.089	0.754226		297.136	1.29		239.4	-1.48667		350.785	-1.0518
1852	453.311	-0.308001		335.018	0.679744		457.972	0.630221		255.296	1.04726		199.382	0.784051		206.654	-0.720368
1853	157.129	1.50675		222.825	-0.0587197		542.938	0.932947		235.112	1.35855		174.957	-0.103714		257.505	-1.13161
1854	293.475	-0.215588		358.895	0.175072		742.234	1.14168		386.482	-1.02073		58.3036	0.845825		428.821	1.38079
1855	362.132	-0.146469		271.3	1.30138		610.935	0.911517		356.674	-0.0849571		165.994	0.637451		302.603	0.972237
1856	213.529	0.0920531		350.555	0.759215		743.182	1.2769		248.588	-0.00883333		211.912	0.789589		363.261	0.570359
1857	344.157	0.620424		130.595	0.728444		508.041	0.87135		183.877	-0.302489		338.04	-0.0932924		321.04	0.927898
1858	168.24	0.334143		286.104	0.609543		500.607	0.701796		277.898	1.36893		290.936	1.52175		245.464	-0.480909
1859	154.943	-0.647395		225.952	0.977506		484.182	1.13005		254.075	1.50432		160.753	-0.954392		326.252	-0.969844
1860	272.357	0.360287		233.773	1.27899		579.92	0.552565		325.008	0.730342		235.14	-0.378984		245.439	1.32463
1861	259.558	1.12985		385.267	1.14274		620.566	0.863105		330.936	0.99828		144.974	0.247047		193.143	0.191911
1862	190.463	0.10742		192.328	1.35051		671.77	0.972898		338.117	1.03701		232.128	0.289782		339.088	-0.436912
1863	273.205	-0.190854		345.665	0.421164		627.349	0.784299		174.651	-1.17099		296.967	-0.0602953		209.567	1.44589
1864	196.06	-0.655258		111.774	0.316653		356.788	1.17117		364.763	1.48117		303.42	0.179073		200.114	0.263574
1865	269.937	1.27306		332.985	-0.88011		518.773	1.22586		151.126	0.0336023		257.195	0.455655		336.812	-0.218775
1866	253.833	0.575276		301.645	0.47308		496.246	0.997614		308.923	0.604984		311.529	0.441845		223.744	-0.402644
1867	301.531	0.251079		303.314	-0.0236454		395.263	0.709594		165.417	0.0456151		145.772	0.736164		289.947	0.599905
1868	345.869	-0.632187		228.274	0.954806		193.948	0.53672		174.055	-0.255805		264.117	0.106004		361.855	-0.558037
1869	269.339	-1.35837		319.282	0.891404		359.496	0.66522		193.81	-1.29112		141.814	-1.35832		358.936	-0.578627
1870	303.148	-0.416438		241.317	0.426339		492.702	0.774322		234.818	-0.736718		287.61	1.16861		364.829	-0.113682
1871	179.875	-0.444829		299.626	0.0596111		496.426	0.758019		210.783	-0.1596		212.573	0.366702		200.567	1.00633
1872	339.336	0.467285		143.745	1.36458		183.176	0.963746		314.164	0.222964		235.699	-0.257258		382.221	-0.32906
1873	332.945	-0.472113		299.197	1.5708		216.932	1.4		250.406	1.03235		242.181	0.380374		377.22	-1.13703
1874	195.737	0.058773		302.538	1.42697		311.009	0.639927		165.325	-0.673745		236.299	-0.775221		304.755	0.227272
1875	303.561	-0.829587		336.531	1.14992		276.269	0.832053		380.702	0.727174		337.914	-0.754661		381.824	-0.214163
1876	240.414	0.284884		284.427	-0.413887		334.673	1.16661		218.165	0.579705		409.781	-0.323712		386.241	0.715549
1877	327.42	-0.864363		223.636	-0.287592		225.909	0.335002		368.646	-0.0471822		303.319	0.165163		259.4	-0.562543
1878	130.756	-0.395749		199.014	-0.185324		474.417	1.36954		254.886	1.04138		260.502	-1.25199		263.561	-1.1783
1879	310.215	1.05532		149.179	-1.41446		412.22	0.891632		327.31	1.49841		198.356	-1.53318		106.282	0.72306
1880	189.608	-0.603791		333.695	-0.40435		399.81	0.777944		342.401	1.34018		266.602	0.907632		149.197	0.728526
1881	270.836	-1.12576		288.884	1.26159		193.094	0.0265421		266.948	-1.19627		320.099	1.07245		257.877	0.893177
1882	231.892	0.871532		227.63	-0.442518		276.25	1.04329		242.348	1.46288		172.528	1.46539		148.907	-0.104715
1883	199.64	-1.15947		177.848	1.15831		242.148	-0.245883		262.393	1.48569		301.639	1.08762		262.899	0.390591
1884	328.961	-1.2182		318.405	0.107956		285.05	-0.576899		268.515	0.739547		139.353	0.672225		276.405	-0.656876
1885	192.203	1.24361		236.888	-0.992572		169.285	0.580684		224.686	1.34672		261.659	-1.21418		329.953	-0.543419
1886	147.683	-1.13738		151.613	-1.35374		224.885	1.08398		339.433	0.756632		277.248	-1.36129		190.775	0.131061
1887	312.156	-0.188983		111.741	0.02831		151.78	1.13129		246.418	0.21836		229.341	1.4303		307.524	0.994285
1888	204.78	1.34451		126.019	-1.32871		160.923	-1.10215		338.923	0.783793		252.817	-0.778426		393.701	0.172146
1889	439.553	-1.15999		225.787	0.351131		255.195	-0.610691		365.642	0.711317		308.871	1.05121		490.28	-1.43018
1890	191.106	-0.832287		310.508	0.846885		253.16	1.05753		332.613	1.22654		243	1.41104		268.573	-1.3391
1891	351.912	-0.602847		417.26	0.110451		177.227	-0.501895		258.787	1.52786		326.391	0.278728		271.67	-0.453812
1892	266.688	-0.948362		308.813	0.211317		297.522	0.65439		285.759	-0.671854		331.996	0.929327		217.423	-1.5708
1893	244.948	0.975377		196.269	0.628496		262.473	-0.473559		261.915	0.90484		360.054	1.54476		225.139	0.248822
1894	388.104	0.624534		290.46	0.280272		127.238	-0.673264		167.581	-0.0281088		153.128	1.35418		399.689	-0.223161
1895	281.032	0.261859		321.333	0.752066		204.03	0.723171		321.868	-0.362638		370.961	0.313519		330.071	-0.82198
1896	163.77	1.33351		388.889	0.493653		323.878	1.1673		195.055	-1.38071		365.253	1.44904		304.319	-0.210465
1897	287.166	-1.09006		235.824	0.489173		250.722	0.65715		320.599	0.719289		127.605	0.120868		408.069	0.475839
1898	270.154	-0.478998		103.87	0.164613		224.275	-1.14036		369.194	1.23274		250.785	0.79935		379.088	-0.611018
1899	189.614	-0.685057		304.022	-0.931847		208.283	1.41898		317.074	1.47022		250.689	0.561625		220.598	-1.35359
1900	168.186	-0.297196		264.619	-0.574276		556.374	0.246232		248.264	0.907842		265.735	0.244492		254.909	-1.44862
1901	204.613	-0.778731		228.545	-0.222681		302.441	0.673194		295.749	0.879156		293.945	-0.235583		351.091	0.633549
1902	404.455	-1.0631		156.21	-0.517758		370.037	-0.475177		285.273	0.378946		330.309	-1.25172		316.124	1.1247
1903	259.457	1.23675		242.236	1.17208		256.098	1.54019		247.499	-0.961244		332.454	-0.797564		305.357	-1.02136
1904	337.283	0.704685		269.859	-0.925529		327.801	0.574774		158.103	-0.658991		378.087	0.257881		225.673	0.373023
1905	360.174	-0.639749		259.386	-0.908985		247.176	-0.365537		310.055	0.573705		202.187	-1.46681		326.393	-0.515024
1906	315.239	-1.47269		166.534	-0.699877		259.695	1.05557		232.64	0.449093		48.5087	1.50041		195.88	-1.4892
1907	361.054	0.0177289		175.039	-0.0955817		207.727	0.704817		149.353	-1.46508		171.861	-0.76776		205.086	0.472544
1908	167.465	-0.0579188		302.943	1.09968		351.27	1.27293		255.68	1.45338		266.283	1.35513		405.688	-0.00958771
1909	250.862	-0.641249		235.021	1.38608		359.033	0.682677		282.068	-1.09541		299.244	0.661695		432.164	-0.164727
1910	322.886	0.922632		311.702	-1.1977		362.572	1.20864		337.961	1.30723		346.815	0.348264		372.72	0.654412
1911	240.901	0.587721		284.116	-0.313512		463.123	-0.155669		351.003	0.597107		252.545	0.66423		284.26	0.667796
1912	137.087	1.53231		261.519	0.578177		160.961	0.98514		370.906	0.665577		246.427	0.713832		325.721	-0.111477
1913	364.711	-0.756578		88.562	1.51854		260.179	-1.36495		304.4	0.506424		317.816	-1.34018		253.016	0.890707
1914	116.728	0.793699		342.668	-0.195364		305.776	1.37775		358.732	0.727349		203.843	1.08967		165.226	-0.675482
1915	212.573	-1.50381		197.577	-0.124088		131.325	-0.265927		254.213	-1.50598		276.155	-0.220028		233.114	-1.5708
1916	350.035	0.134801		310.014	-0.752896		220.03	-1.5708		396.727	0.843842		277.316	1.44321		367.588	1.47652
1917	166.851	-1.48622		238.85	-0.677235		431.75	-0.109714		337.466	-0.81187		430.458	0.264522		289.623	-0.919117
1918	199	0.641119		148.619	-0.396398		265.972	-1.34989		297.242	-1.26301		285.148	-1.23262		208.561	0.665848
1919	339.596	-0.824313		342.335	-0.45108		464.429	-0.133176		253.484	0.184047		231.889	-0.163771		342.028	-0.0183033
1920	313.789	-0.712021		258.253	0.675554		507.094	0.615746		168.348	-1.43024		302.872	-0.323313		334.996	1.15883
1921	114.029	0.282925		327.379	0.572609		257.291	-0.678442		405.968	1.06321		182.981	0.791973		315.214	-0.955302
1922	321.649	0.720387		291.943	0.516006		333.202	0.19318		429.291	1.51995		175.14	0.937461		345.228	-0.522095
1923	347.876	0.379334		157.228	-0.0279605		379.786	0.861923		306.477	1.18374		317.207	0.527288		175.161	1.41808
1924	255.586	-1.35824		207.744	1.27844		241.683	1.46655		378.261	0.718653		230	1.47838		224.587	-0.109938
1925	320.667	-0.240007		209.589	0.701268		318.124	-1.07051		279.186	-1.08571		426.616	1.43699		333.866	1.00473
1926	181.233	-1.06771		250.517	-0.430636		263.821	0.285648		393.775	1.23504		238.467	0.744042		239.48	1.10811
1927	124.597	-0.374594		211.018	1.0218		173.796	0.828051		366.735	1.08036		342.907	1.41982		407.648	-0.866169
1928	235.311	1.00466		242.705	-1.3331		230.198	1.41747		186.47	0.661518		359.312	-0.646027		278.06	0.300464
1929	278.858	-0.664299		190.146	0.386342		264.331	0.657663		320.558	-0.756087		408.625	-0.928409		401.85	-0.459657
1930	203.337	-0.898477		183.663	1.45119		316.256	0.395868		355.468	0.93029		401.88	-1.01185		713.149	-1.57047
1931	335.382	-1.11085		188.647	-1.51606		253.069	0.13108		363.897	1.3034		406.688	-0.959818		110.891	0.752915
1932	210.007	-1.36171		346.166	0.946458		358.883	0.333684		306.849	0.543023		367.439	-1.05599		397.085	-0.791642
1933	158.644	1.48642		191.201	-0.210317		343.028	-0.23138		288.906	0.33315		255.31	1.48077		293.214	-0.720934
1934	317.282	-0.724486		296.915	1.38337		232.806	0.432879		177.155	-1.35881		301.572	1.12384		193.601	1.53861
1935	413.895	-0.697585		185.117	0.0164904		163.007	1.17153		365.291	1.35324		299.609	0.309841		320.984	-1.27584
1936	382.25	-0.344077		231.428	-0.207128		448.619	-1.06102		252.008	0.988233		300.972	0.656878		261.827	-1.01188
1937	148.449	-0.631332		213.609	0.54462		251.886	1.50069		323.521	0.479807		239.462	0.551332		312.781	0.947394
1938	280.141	0.506706		327.186	-1.1188		262.696	1.4801		231.126	0.869924		233.052	-1.22016		464.069	1.05572
1939	316.723	-0.130752		214.601	-0.00968592		235.049	0.998025		202.37	-0.5908		348.408	-1.22259		303	-1.1895
1940	294.455	-0.344006		283.729	-0.159		249.468	1.0769		336.692	0.876354		328.858	-1.06074		326.761	-1.16858
1941	379.94	-0.334481		286.925	0.203203		503.519	0.090163		394.675	0.533821		148.927	-0.776949		176.744	-1.44096
1942	255.929	-0.864715		119.073	0.102078		235.543	1.19631		472.787	0.287722		314.958	0.219939		102.887	-0.162583
1943	174.489	0.0546989		186.275	1.41252		298.208	0.91862		262.962	-0.836072		233.033	1.5708		409.6	-1.2839
1944	368.636	-0.591612		181.635	-0.575632		460.585	-0.501425		241.095	0.844766		67.4374	0.481626		216.961	1.45087
1945	339.892	-1.13923		301.926	0.619521		274.644	1.11412		199.637	-0.538439		370.584	0.972108		314.019	0.235572
1946	320.817	-0.243575		256.438	-0.955133		338.385	0.190072		252.346	-1.44725		238.714	1.34146		350.886	-1.2447
1947	288.829	-0.394674		312.534	-0.544467		238.966	0.191304		339.155	1.15967		386.549	-1.52924		349.329	-0.731164
1948	327.88	1.5543		234.875	0.8276		456.234	-0.223107		292.867	-0.146855		254.606	1.35084		352.147	-0.466876
1949	379.324	-0.70883		252.46	-0.404638		146.973	1.5708		225.37	0.458232		304.935	1.13636		316.928	-1.01356
1950	254.34	-0.878148		227.097	0.582448		139.187	-0.517749		354.312	1.20458		290.835	0.596918		263.848	1.18
1951	242.353	-1.01345		272.694	0.0785238		374.957	1.48575		215.044	1.20189		304.076	1.32957		180.43	-0.872594
1952	203.139	0.494706		250.312	-0.463489		207.586	1.40845		415.512	0.561565		357.057	1.45076		350.633	1.56043
1953	296.744	-1.30904		258.946	-0.204849		223.25	-0.317822		364.28	0.292348		417.959	-1.48875		243.931	1.39273
1954	438.523	1.30423		264.232	-0.0475672		309.238	1.11277		290.076	1.01143		289.602	-0.0137887		263.398	0.482482
1955	249.407	-1.50279		229.81	0.17656		413.884	0.912887		352.94	1.18654		306.396	-0.455178		247.085	-0.0787321
1956	336.885	-1.27025		346.123	-0.153338		229.47	0.146652		291.863	0.974526		147.934	0.763822		181.266	-0.734725
1957	468.118	0.249369		339.671	0.685678		281.378	0.576698		326.582	0.89291		286.045	0.693916		451.645	0.889127
1958	156.792	0.366203		256.627	-0.952256		328.227	-1.24001		236.207	1.14063		162.754	0.34641		426.952	-0.918726
1959	110.726	0.399821		148.686	-1.43057		213.693	-0.331479		368.908	1.18289		349.042	0.544409		385.797	-1.09882
1960	153.284	-0.73136		209.586	-0.701034		166.346	-0.228652		317.481	-0.485052		243.441	1.20567		715.774	-1.57048
1961	319.302	0.45453		171.52	-1.5708		149.571	1.18024		372.774	1.11822		314.416	0.190933		273.592	-0.743599
1962	341.484	-0.650898		313.164	0.967692		263.057	0.0564477		275.192	0.408699		332.615	-0.0302639		258.205	-0.423782
1963	364.765	-0.898841		158.722	-0.857063		352.588	1.28468		227.205	0.913423		391.012	0.0111219		349.268	-0.405212
1964	377.56	0.994229		129.126	-1.54721		376.888	0.863094		153.726	-0.386143		367.561	0.220872		300.75	-0.813316
1965	225.392	-0.184707		232.591	0.373042		229.099	0.285926		343.811	0.591368		249.418	0.365372		453.635	-0.20639
1966	345.148	-1.01319		354.644	-0.344262		209.931	-0.862328		260.491	0.455776		333.554	-1.00469		252.488	0.698432
1967	323.225	-0.72014		388.01	-1.56402		341.636	0.824709		182.47	-1.18438		290.283	-1.02741		269.83	1.44272
1968	132.524	-0.239776		265.7	-0.247817		223.425	0.39325		321.766	0.114869		273.442	0.0164337		394.499	-1.54818
1969	315.588	-0.726901		345.269	-1.07581		339.774	-1.1801		310.543	-0.495632		283.441	0.889		361.338	1.06697
1970	268.835	-0.610513		183.881	0.39516		245.204	1.03524		357.88	0.648275		293.805	0.371345		83.5301	0.931595
1971	196.848	0.0379304		253.717	1.21251		318.527	0.690523		284.942	0.622188		187.05	-0.171498		383.049	-1.03966
1972	296.351	-0.0405481		299.59	0.181304		204.162	1.18316		405.779	0.483227		351.977	0.126497		408.512	0.441686
1973	392.19	1.1324		286.658	0.885126		265.332	0.480931		270.015	1.36974		273.754	-1.07766		440.815	-0.44453
1974	259.789	1.03806		203.701	0.851827		264.733	0.277295		283.178	1.28013		253.675	0.129144		153.959	-0.0560098
1975	185.057	1.43902		335.499	1.39743		371.501	0.469116		281.991	1.3953		292.467	1.02904		310.635	1.42874
1976	322.817	0.949481		195.559	1.30351		228.266	0.523801		243.253	1.06428		261.988	-1.08175		341.843	-0.605306
1977	283.84	-0.93023		276.074	0.38133		298.464	1.09036		388.185	0.595276		322.401	1.52795		377.911	-1.12063
1978	238.436	0.790279		268.637	0.742773		278.811	-0.579818		213.876	0.39493		308.975	-0.633141		317.112	1.42108
1979	300.698	-0.854637		210.237	0.096093		115.821	1.2923		260.153	0.0696591		226.492	1.1542		327.898	1.41253
1980	418.626	-0.469688		385.524	0.0896669		361.547	1.03704		397.641	0.630292		242.238	1.33549		335.793	-0.63639
1981	236.801	0.328236		163.885	0.42429		284.492	0.594614		366.007	1.07115		275.978	0.353495		211.525	-0.525871
1982	372.493	-0.348076		227.597	-1.5708		351.488	-0.802238		321.513	1.38496		209.465	-1.1576		254.233	-1.10158
1983	98.355	1.00707		330.327	-1.35036		366.175	-0.339624		353.921	0.437482		105.231	1.25662		281.647	-1.21106
1984	232.623	0.273741		281.16	-0.284662		457.401	1.36169		365.714	0.995856		343.373	-0.0128616		237.608	-0.88181
1985	316.45	1.41898		335.686	0.849307		259.696	-1.34488		134.717	0.84724		251.561	-0.700138		271.105	0.147258
1986	236.039	0.419687		264.114	-0.177638		147.911	-0.45601		318.726	0.644909		152.299	1.01194		115.735	0.787554
1987	199.833	1.52282		152.4	-0.290029		384.283	-0.998999		359.595	-1.3605		353.453	1.07812		268.487	-1.3262
1988	349.766	-0.687301		345.571	0.965737		424.43	0.684255		279.173	0.288404		175.302	1.5708		515.19	-0.772685
1989	217.675	1.5708		208.419	0.570572		310.501	0.253002		284.534	0.816605		318.31	-0.221715		568.158	-0.890968
1990	289.211	-1.48156		302.544	-0.596713		230.054	0.37602		388.878	0.609941		128.261	-0.00255741		321.222	-0.657661
1991	241.687	0.0612116		189.211	0.896042		374.127	1.26592		425.557	0.842294		244.667	-0.595196		421.36	-0.839909
1992	220.537	1.14093		285.322	-0.257462		550.626	1.03822		314.86	0.211725		336.523	0.129591		274.857	-1.50167
1993	301.888	-1.09742		186.687	-0.541854		295.304	-0.149922		231.654	0.967006		72.2512	0.429348		212.704	0.000616691
1994	258.817	-0.241724		297.192	-0.707654		255.688	0.213188		102.368	0.766761		318.894	0.471773		341.961	-0.985026
1995	263.657	1.41579		301.487	-0.462707		342.132	-1.28218		262.458	-1.5708		329.454	0.305528		456.688	-0.224686
1996	218.439	-0.915964		208.821	-0.3446		286.958	0.900911		374.981	0.23825		236.79	0.194188		362.399	-0.558461
1997	174.441	-0.0019481		310.063	0.146377		179.896	1.00273		222.354	0.219603		213.72	0.220468		380.871	-0.244213
[truncated: 669 more rows]
