# Supplementary material for: Stall force measurement of the kinesin-3 motor KIF1A using a programmable DNA origami nanospring
Source: eLife. 2026 Mar 25;14:RP108477. doi: 10.7554/eLife.108477 (PMC13016605; doi:10.7554/eLife.108477)
Supplement: Figure 5—source data 1. [file elife-108477-fig5-data1.xlsx]

## Sheet: L_stall
L_stall (nm)
	WT/WT	P305L/P305L	P305L/WT	V8M/V8M	V8M/WT	A255V/A255V	A255V/WT
n	86	58	41	95	61	83	40
	571.735	366.806	446.811	349.744	441.906	519.88	518.512
	579.468	400.151	384.814	403.734	435.547	546.525	509.729
	545.95	384.091	424.884	483.555	448.911	425.831	501.263
	542.972	397.247	446.658	490.494	411.289	430.994	514.62
	539.733	282.633	452.539	466.583	478.004	448.108	467.394
	533.578	297.62	449.441	475.527	448.723	456.274	507.4
	527.164	414.969	457.15	505.341	459.497	482.291	474.1
	581.917	379.845	450.457	507.012	452.115	452.787	469.71
	590.24	413.686	456.29	494.689	434.752	467.296	487.5
	521.902	300.132	464.276	500.183	471.109	436.863	503.652
	563.4	307.109	459.593	434.513	444.028	487.585	538.85
	555.934	302.068	449.974	441.434	438.538	471.502	520.224
	506.319	400.044	443.249	437.814	366.098	468.851	483.329
	490.925	317.918	417.699	454.902	385.993	525.417	510.591
	478.342	314.793	344.523	497.862	381.288	512.567	494.179
	487.365	293.745	341.525	471.639	438.481	519.17	489.31
	473.063	344.369	339.055	474.937	385.095	546.533	510.426
	371.213	366.014	346.189	498.379	412.343	532.919	486.729
	518.862	363.747	370.838	511.029	443.723	530.107	515.608
	553.133	382.05	346.623	519.184	446.686	535.738	501.68
	554.848	376.076	378.614	481.086	414.699	534.408	466.563
	564.411	380.523	338.037	538.377	412.663	571.752	487.253
	466.781	377.1	340.338	488.91	437.353	576.727	468.397
	555.438	366.889	313.214	529.232	444.133	562.037	481.194
	473.688	397.532	363.951	528.643	431.714	553.607	519.841
	576.507	362.45	327.223	513.146	465.852	493.101	545.42
	526.475	354.725	333.516	512.448	445.036	348.831	522.803
	543.163	291.507	366.961	521.45	440.668	467.222	506.907
	462.632	365.916	323.309	467.405	441.564	474.777	500.016
	482.107	309.515	339.718	520.945	462.326	540.553	513.269
	495.81	313.194	336.282	516.859	471.975	529.577	487.732
	462.062	334.698	343.981	509.254	454.654	558.77	457.231
	533.368	326.804	323.849	523.889	465.76	571.551	472.967
	484.377	320.747	303.879	333.268	470.626	508.159	435.335
	514.532	298.948	345.027	536.762	475.748	509.924	493.856
	530.911	335.4	338.357	540.667	472.219	468.217	453.661
	498.984	302.086	346.482	524.005	403.027	484.751	471.672
	568.057	382.063	345.498	459.533	471.818	503.638	471.165
	518.408	389.794	351.985	478.175	372.33	461.353	453.349
	566.208	281.579	341.937	470.184	456.779	422.409	469.079
	570.031	305.559	406.306	353.943	453.291	549.097
	571.122	306.211		437.383	455.182	467.41
	535.038	358.05		419.338	458.367	491.552
	547.306	307.551		481.362	434.207	488.001
	552.233	364.15		427.689	449.449	458.369
	601.587	354.785		343.377	448.729	468.639
	606.988	379.449		519.46	431.593	492.723
	614.081	386.967		515.311	459.03	470.432
	593.457	309.201		504.677	446.299	489.062
	553.888	326.536		482.77	462.366	494.053
	586.015	352.649		349.988	453.239	583.545
	474.774	492.512		410.694	432.881	517.589
	524.027	430.375		507.257	452.044	592.784
	562.096	442.492		533.225	448.501	577.836
	533.684	379.326		526.59	446.093	558.305
	529.221	375.193		531.795	472.141	539.54
	538.862	426.161		503.357	420.284	486.959
	487.475	266.75		537.339	455.102	446.85
	544.305			500.992	450.381	436.52
	551.471			510.057	402.858	464.668
	552.854			531.267	430.238	495.247
	525.035			482.227		521.003
	515.882			517.881		508.401
	549.508			528.986		536.038
	564.898			527.671		508.707
	556.873			542.503		528.602
	557.404			544.665		491.949
	550.489			543.255		522.075
	548.281			535.835		488.173
	510.965			540.087		487.038
	485.344			512.585		481.069
	494.561			485.766		513.322
	464.94			529.645		506.982
	385.969			533.944		554.422
	457.385			553.321		582.37
	456.306			500.885		534.268
	438.402			498.922		477.225
	552.651			523.353		479.677
	506.664			520.897		497.915
	510.771			521.335		501.136
	527.058			527.064		513.444
	532.046			501.934		480.989
	537.034			526.408		507.94
	581.163			480.778
	575.674			424.998
	534.107			402.64
				431.761
				419.707
				431.308
				440.097
				499.879
				344.314
				492.555
				351.239
				505.351

## Sheet: delta_t
delta_t (s)
	WT/WT	P305L/P305L	P305L/WT	V8M/V8M	V8M/WT	A255V/A255V	A255V/WT
n	86	58	41	95	61	83	40
	12.09	0.3	0.24	0.99	0.3	1.53	1.56
	39.87	0.63	0.15	0.63	1.14	4.56	1.05
	10.74	0.27	0.3	0.78	6.12	0.42	0.69
	17.97	0.72	6.6	1.05	8.34	2.04	7.2
	1.53	0.84	1.77	1.29	7.56	3.63	0.45
	60.15	0.57	0.48	2.79	3.57	2.34	5.19
	32.73	0.18	1.65	2.76	3.87	1.29	2.04
	5.94	0.18	0.3	14.22	0.6	0.57	1.86
	2.25	0.3	2.19	1.59	9.54	4.92	1.98
	10.08	0.24	0.96	7.02	7.2	0.24	0.6
	16.41	0.9	7.8	0.93	4.11	7.2	4.38
	4.32	2.01	0.75	2.52	5.1	0.18	3.15
	13.47	0.24	0.18	0.45	6.9	1.05	1.17
	3.9	1.41	2.61	0.33	12.9	1.86	2.31
	11.16	1.74	0.54	2.61	6.6	21.09	1.35
	2.28	2.94	0.51	2.37	3.54	2.58	1.38
	0.72	0.6	0.96	2.58	6.09	0.99	3.45
	1.11	0.57	0.15	3.75	25.11	6.27	0.75
	0.87	0.42	0.21	2.25	8.64	4.44	4.32
	1.38	1.35	0.63	0.75	0.51	6.87	3.18
	5.28	1.2	0.15	0.78	1.26	2.82	0.3
	2.19	0.48	0.21	1.02	0.15	14.13	4.11
	1.38	0.84	0.66	0.63	0.96	3.6	4.77
	10.14	0.24	0.21	1.68	9.75	1.86	1.29
	4.59	0.21	0.24	1.11	0.72	9.72	2.16
	4.68	2.4	0.63	2.25	15.75	3.48	1.68
	3.12	0.84	0.24	4.08	0.81	1.17	1.8
	7.17	0.12	0.96	7.14	0.24	6.33	0.69
	1.14	1.2	0.3	0.27	0.33	10.08	0.81
	9.27	2.67	0.15	1.77	4.11	2.1	0.21
	33.69	0.48	0.24	18.42	0.18	7.29	0.75
	0.78	0.57	0.63	21.54	0.3	1.86	0.27
	9.96	0.48	1.65	20.37	0.66	2.82	2.07
	14.85	0.54	0.18	0.48	4.92	6.48	1.23
	13.56	0.3	0.9	11.19	0.33	16.44	0.45
	32.37	0.21	0.39	0.33	8.1	4.17	0.45
	2.25	0.72	0.36	7.8	9.33	16.23	0.45
	1.56	0.21	0.36	15.18	0.15	4.26	3.15
	3.27	4.08	0.36	0.57	0.18	3.06	0.21
	1.38	1.74	0.15	1.02	2.97	1.86	0.21
	1.86	1.14	0.54	1.02	0.48	2.04
	0.96	0.33		0.54	1.35	2.61
	10.77	0.51		7.59	0.6	0.33
	47.19	1.59		4.29	0.3	1.62
	22.5	0.99		3.96	0.42	0.33
	38.43	1.98		0.51	0.39	0.24
	25.23	0.18		5.28	0.24	0.87
	17.52	0.24		1.41	0.66	1.11
	0.45	0.12		1.8	4.38	0.66
	5.13	0.45		1.32	0.27	1.02
	23.25	0.78		0.27	1.11	6.51
	6.15	0.3		1.23	0.39	1.11
	6.24	0.51		1.56	0.3	20.49
	15.48	3.51		2.64	0.21	18.66
	3.27	0.3		0.75	0.15	1.92
	2.76	0.24		0.36	0.21	0.66
	5.94	0.45		0.81	0.15	0.72
	0.51	2.55		0.27	0.21	0.36
	20.85			1.02	1.23	0.39
	1.62			0.51	19.02	0.51
	9.99			1.92	5.07	0.66
	23.19			1.32		1.11
	3.81			0.84		0.15
	14.1			1.32		0.9
	2.76			1.56		0.51
	12.27			1.89		0.27
	3.69			0.87		0.42
	2.91			0.87		0.24
	38.31			0.45		2.13
	48.75			2.7		2.07
	11.16			1.05		1.68
	1.41			0.27		1.62
	2.52			1.38		2.01
	0.24			1.62		1.92
	2.25			3.03		4.83
	1.86			4.05		1.02
	1.29			0.27		1.14
	5.97			3.24		1.26
	2.58			2.61		3.99
	4.86			9.72		0.51
	4.2			5.46		4.08
	8.1			0.87		1.41
	17.1			6		5.73
	2.82			0.54
	16.41			1.68
	1.26			3.81
				0.21
				1.56
				0.18
				0.45
				22.2
				0.75
				16.32
				1.32
				1.8
